# Supplementary material
Source: PubMed Central journal article supplement (PMC7805340)
Supplement: advancesADV2020003265C-suppl1.pdf [file advancesADV2020003265C-suppl1.pdf]

# ASH ISTH NHF WFH Guidelines on the Diagnosis of Von Willebrand Disease

## Supplement 1: Panel and Systematic Review Team Membership

**Table:** Panel Members

|    |                    |                                  |
|----|--------------------|----------------------------------|
| 1  | Paula D. James     | Clinical Co-Chair                |
| 2  | Reem A. Mustafa    | Methods Co-Chair                 |
| 3  | Nathan T. Connell  | Clinical Vice-Chair              |
| 4  | Barbara Ameer      | Patient Representative           |
| 5  | Jorge Di Paola     | Pediatric Hematologist           |
| 6  | Jeroen Eikenboom   | Hematologist, Vascular Medicine  |
| 7  | Nicolas Giraud     | Patient Representative           |
| 8  | Sandra Haberichter | Scientist                        |
| 9  | Vicki Jacobs-Pratt | Patient Representative           |
| 10 | Barbara Konkle     | Hematologist                     |
| 11 | Claire McLintock   | Hematologist, Obstetric Medicine |
| 12 | Simon McRae        | Hematologist                     |
| 13 | Robert Montgomery  | Pediatric Hematologist           |
| 14 | James S. O'Donnell | Hematologist                     |
| 15 | Nikole Scappe      | Patient Representative           |
| 16 | Robert Sidonio Jr. | Pediatric Hematologist           |
| 17 | Francesca Stufano* | Scientist                        |

\*Did not participate after March 2019

**Table:** Systematic Review Team

|    |                  |                        |
|----|------------------|------------------------|
| 1  | Reem A. Mustafa  | Principal Investigator |
| 3  | Mohamad A. Kalot | Research Fellow        |
| 4  | Nedaa Husainat   | Research Fellow        |
| 5  | Omar Abughanimeh | Researcher             |
| 6  | Abdalla Alayli   | Researcher             |
| 7  | Osama Diab       | Researcher             |
| 8  | Ahmad Dimassi    | Researcher             |
| 9  | Bader Madoukh    | Researcher             |
| 10 | Aref Qureini     | Researcher             |
| 11 | Sammy Tayiem     | Researcher             |
