# Supplementary material
Source: PubMed Central journal article supplement (PMC7805340)
Supplement: advancesADV2020003265C-suppl5.pdf [file advancesADV2020003265C-suppl5.pdf]

# Supplement 5 EtDs for the ASH ISTH NHF WFH Guidelines on the Diagnosis of von Willebrand Disease

## Questions 1 and 2

3%

20%

50%

Question 3

Question 4

Question 5

Question 6

Question 7

Question 8

Question 9

Question 10

### Question 1 and 2 (3%)

#### Should a bleeding assessment tool be used to diagnose patients suspected of having von Willebrand Disease?

|                               |                                                                                                                                                                                                                                                                                                                                                                                                                                                                                                                                                                                                       |
|-------------------------------|-------------------------------------------------------------------------------------------------------------------------------------------------------------------------------------------------------------------------------------------------------------------------------------------------------------------------------------------------------------------------------------------------------------------------------------------------------------------------------------------------------------------------------------------------------------------------------------------------------|
| <b>POPULATION:</b>            | Patients suspected of von Willebrand Disease                                                                                                                                                                                                                                                                                                                                                                                                                                                                                                                                                          |
| <b>INTERVENTION:</b>          | Bleeding Assessment Tool                                                                                                                                                                                                                                                                                                                                                                                                                                                                                                                                                                              |
| <b>PURPOSE OF THE TEST:</b>   | Identify patients with VWD                                                                                                                                                                                                                                                                                                                                                                                                                                                                                                                                                                            |
| <b>ROLE OF THE TEST:</b>      | Identify patients with VWD                                                                                                                                                                                                                                                                                                                                                                                                                                                                                                                                                                            |
| <b>LINKED TREATMENTS:</b>     | Desmopressin, Tranexamic acid, Factor replacement                                                                                                                                                                                                                                                                                                                                                                                                                                                                                                                                                     |
| <b>ANTICIPATED OUTCOMES:</b>  | BATs – False positive, BATs – False negative, BATs – True positive, BATs – True negative Major bleeding, transfusion and treatment, blood loss, gastrointestinal bleeding, symptom severity, minor bleeding, mortality.                                                                                                                                                                                                                                                                                                                                                                               |
| <b>SETTING:</b>               | Outpatient                                                                                                                                                                                                                                                                                                                                                                                                                                                                                                                                                                                            |
| <b>PERSPECTIVE:</b>           | Clinical recommendation – population perspective                                                                                                                                                                                                                                                                                                                                                                                                                                                                                                                                                      |
| <b>BACKGROUND:</b>            | Von Willebrand disease (VWD) is the most common inherited bleeding disorder known in humans: while estimated to affect between 0.1 and 1% of the general population, many are never diagnosed. Assessment of the severity of bleeding symptoms is challenging because of the difficulties in reporting subjective bleeding symptoms in a consistent way. The importance of the problem arises from the necessity of assessing the bleeding history to limit the need for unnecessary laboratory testing and also to avoid false-positive cases that are possible when diagnosing VWD. (Pathare, 2018) |
| <b>SUBGROUPS:</b>             | This recommendation addresses patients with a VWD pretest probability of 3%, corresponding to the population of patients typically evaluated for suspected VWD because of a personal history of abnormal prolonged aPTT.                                                                                                                                                                                                                                                                                                                                                                              |
| <b>CONFLICT OF INTERESTS:</b> | <p>ASH conflict of interest declaration and management policies were applied, and the following panel members were voting panel members (determining the direction and strength of the recommendation): Sandra Haberichter, Jeroen Eikenboom, Barbara Konkle, Robert Sidonio Jr, Simon McRae, Robert Montgomery, James O'Donnell, Claire McLintock, Barbara Ameer, Nicolas Giraud, Nikole Scappe, Vicki Jacobs-Pratt, Paula James, Nathan Connell.</p> <p>No panel members recused as a result of risk of conflicts of interest.</p>                                                                  |

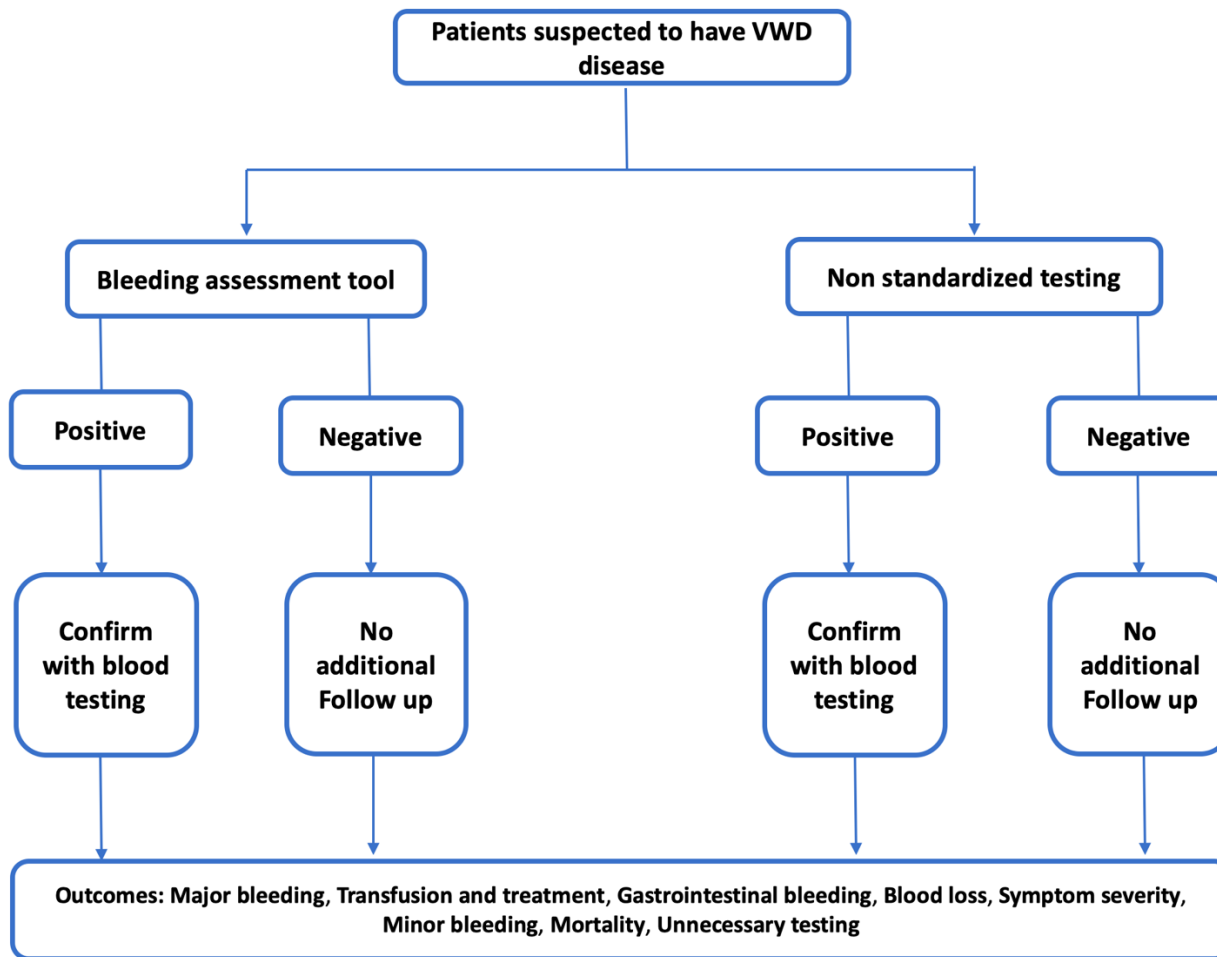

**ASSESSMENT**

| Problem                                                                                                                                                                                                                                               |                                                                                                                                                                                                                                                                                                                                                            |                                                                                                                 |
|-------------------------------------------------------------------------------------------------------------------------------------------------------------------------------------------------------------------------------------------------------|------------------------------------------------------------------------------------------------------------------------------------------------------------------------------------------------------------------------------------------------------------------------------------------------------------------------------------------------------------|-----------------------------------------------------------------------------------------------------------------|
| Is the problem a priority?                                                                                                                                                                                                                            |                                                                                                                                                                                                                                                                                                                                                            |                                                                                                                 |
| JUDGEMENT                                                                                                                                                                                                                                             | RESEARCH EVIDENCE                                                                                                                                                                                                                                                                                                                                          | ADDITIONAL CONSIDERATIONS                                                                                       |
| <ul style="list-style-type: none"> <li><input type="radio"/> No</li> <li><input type="radio"/> Probably no</li> <li><input type="radio"/> Probably yes</li> <li><input checked="" type="radio"/> Yes</li> <li><input type="radio"/> Varies</li> </ul> | <p>Von Willebrand disease (VWD) is the most common inherited bleeding disorder known in humans: while estimated to affect between 0.1 and 1% of the general population, many are never diagnosed. Assessment of the severity of bleeding symptoms is challenging because of the difficulties in reporting subjective bleeding symptoms in a consistent</p> | <p>This question was judged to be a priority among many candidate questions to address in these guidelines.</p> |

|              |                                                                                                                                                                                                                                                   |  |
|--------------|---------------------------------------------------------------------------------------------------------------------------------------------------------------------------------------------------------------------------------------------------|--|
| ○ Don't know | way. The importance of the problem arises from the necessity of assessing the bleeding history to limit the need for unnecessary laboratory testing and also to avoid false-positive cases that are possible when diagnosing VWD. (Pathare, 2018) |  |
|--------------|---------------------------------------------------------------------------------------------------------------------------------------------------------------------------------------------------------------------------------------------------|--|

**Test accuracy**  
How accurate is the test?

| JUDGEMENT | RESEARCH EVIDENCE | ADDITIONAL CONSIDERATIONS |
|-----------|-------------------|---------------------------|
|-----------|-------------------|---------------------------|

| <ul style="list-style-type: none"> <li>○ Very inaccurate</li> <li>○ Inaccurate</li> <li>● Accurate</li> <li>○ Very accurate</li> <li>○ Varies</li> <li>○ Don't know</li> </ul> | <p>Pooled sensitivity across 7 cohort studies with 112 patients was 0.75 (95% CI: 0.66 to 0.83)</p> <p>Pooled specificity across 7 cohort studies with 863 patients was 0.54 (95% CI: 0.29 to 0.77)</p> <table border="1" data-bbox="449 565 1276 1390"> <thead> <tr> <th data-bbox="449 565 636 808">Outcome</th> <th data-bbox="636 565 812 808">Study design</th> <th data-bbox="812 565 1041 808">Test accuracy CoE</th> <th data-bbox="1041 565 1276 808">Effect per 1000 patients/year for pre-test probability of 3%</th> </tr> </thead> <tbody> <tr> <td data-bbox="449 808 636 932">True positives</td> <td data-bbox="636 808 812 1101" rowspan="2">cross-sectional (cohort type accuracy study)</td> <td data-bbox="812 808 1041 1101" rowspan="2">⊕⊕⊕⊕<br/>HIGH</td> <td data-bbox="1041 808 1276 932">23 (20 to 25)</td> </tr> <tr> <td data-bbox="449 932 636 1101">False negatives</td> <td data-bbox="1041 932 1276 1101">7 (5 to 10)</td> </tr> <tr> <td data-bbox="449 1101 636 1224">True negatives</td> <td data-bbox="636 1101 812 1390" rowspan="2">cross-sectional (cohort type accuracy study)</td> <td data-bbox="812 1101 1041 1390" rowspan="2">⊕⊕⊕○<br/>MODERATE<sup>a</sup></td> <td data-bbox="1041 1101 1276 1224">523 (284 to 744)</td> </tr> <tr> <td data-bbox="449 1224 636 1390">False positives</td> <td data-bbox="1041 1224 1276 1390">447 (226 to 686)</td> </tr> </tbody> </table> | Outcome                       | Study design                                                 | Test accuracy CoE | Effect per 1000 patients/year for pre-test probability of 3% | True positives | cross-sectional (cohort type accuracy study) | ⊕⊕⊕⊕<br>HIGH | 23 (20 to 25) | False negatives | 7 (5 to 10) | True negatives | cross-sectional (cohort type accuracy study) | ⊕⊕⊕○<br>MODERATE <sup>a</sup> | 523 (284 to 744) | False positives | 447 (226 to 686) | <p>The studies assess Bleeding Assessment Tools (BATs) versus non-BATs and do not compare BATs with non-standardized testing.</p> <p>The panel judged the test accuracy to be accurate for patients with a pretest probability of 3% corresponding to the population of patients typically evaluated for suspected VWD because of a personal history of abnormal laboratory blood testing.</p> |
|--------------------------------------------------------------------------------------------------------------------------------------------------------------------------------|-----------------------------------------------------------------------------------------------------------------------------------------------------------------------------------------------------------------------------------------------------------------------------------------------------------------------------------------------------------------------------------------------------------------------------------------------------------------------------------------------------------------------------------------------------------------------------------------------------------------------------------------------------------------------------------------------------------------------------------------------------------------------------------------------------------------------------------------------------------------------------------------------------------------------------------------------------------------------------------------------------------------------------------------------------------------------------------------------------------------------------------------------------------------------------------------------------------------------------------------------------------------------------------------------------------------------------------------------------------------------------------------------------------------------------|-------------------------------|--------------------------------------------------------------|-------------------|--------------------------------------------------------------|----------------|----------------------------------------------|--------------|---------------|-----------------|-------------|----------------|----------------------------------------------|-------------------------------|------------------|-----------------|------------------|------------------------------------------------------------------------------------------------------------------------------------------------------------------------------------------------------------------------------------------------------------------------------------------------------------------------------------------------------------------------------------------------|
| Outcome                                                                                                                                                                        | Study design                                                                                                                                                                                                                                                                                                                                                                                                                                                                                                                                                                                                                                                                                                                                                                                                                                                                                                                                                                                                                                                                                                                                                                                                                                                                                                                                                                                                                | Test accuracy CoE             | Effect per 1000 patients/year for pre-test probability of 3% |                   |                                                              |                |                                              |              |               |                 |             |                |                                              |                               |                  |                 |                  |                                                                                                                                                                                                                                                                                                                                                                                                |
| True positives                                                                                                                                                                 | cross-sectional (cohort type accuracy study)                                                                                                                                                                                                                                                                                                                                                                                                                                                                                                                                                                                                                                                                                                                                                                                                                                                                                                                                                                                                                                                                                                                                                                                                                                                                                                                                                                                | ⊕⊕⊕⊕<br>HIGH                  | 23 (20 to 25)                                                |                   |                                                              |                |                                              |              |               |                 |             |                |                                              |                               |                  |                 |                  |                                                                                                                                                                                                                                                                                                                                                                                                |
| False negatives                                                                                                                                                                |                                                                                                                                                                                                                                                                                                                                                                                                                                                                                                                                                                                                                                                                                                                                                                                                                                                                                                                                                                                                                                                                                                                                                                                                                                                                                                                                                                                                                             |                               | 7 (5 to 10)                                                  |                   |                                                              |                |                                              |              |               |                 |             |                |                                              |                               |                  |                 |                  |                                                                                                                                                                                                                                                                                                                                                                                                |
| True negatives                                                                                                                                                                 | cross-sectional (cohort type accuracy study)                                                                                                                                                                                                                                                                                                                                                                                                                                                                                                                                                                                                                                                                                                                                                                                                                                                                                                                                                                                                                                                                                                                                                                                                                                                                                                                                                                                | ⊕⊕⊕○<br>MODERATE <sup>a</sup> | 523 (284 to 744)                                             |                   |                                                              |                |                                              |              |               |                 |             |                |                                              |                               |                  |                 |                  |                                                                                                                                                                                                                                                                                                                                                                                                |
| False positives                                                                                                                                                                |                                                                                                                                                                                                                                                                                                                                                                                                                                                                                                                                                                                                                                                                                                                                                                                                                                                                                                                                                                                                                                                                                                                                                                                                                                                                                                                                                                                                                             |                               | 447 (226 to 686)                                             |                   |                                                              |                |                                              |              |               |                 |             |                |                                              |                               |                  |                 |                  |                                                                                                                                                                                                                                                                                                                                                                                                |

|  |                                                                                                                                                                                                                                       |  |
|--|---------------------------------------------------------------------------------------------------------------------------------------------------------------------------------------------------------------------------------------|--|
|  | <p>a. The heterogeneity measurement I2 is 98% and the point estimates of specificity are not homogenous which cannot be explained by the setting or risk of bias a priori</p> <p>Refer to the Appendix at the end of the document</p> |  |
|--|---------------------------------------------------------------------------------------------------------------------------------------------------------------------------------------------------------------------------------------|--|

**Desirable Effects**  
How substantial are the desirable anticipated effects?

| JUDGEMENT                                                                                                                                                                                                                                                                                    | RESEARCH EVIDENCE                                                                                                                                                                                                                                                                                                                                                                                                                                                                                                                                                                                                                                                                                                                                                                                                                                                                                                                                                                                                                                                                                                                                                              | ADDITIONAL CONSIDERATIONS                                                                                                                                                                                                                                                                                                                                                                                                                                                                                                                                             |
|----------------------------------------------------------------------------------------------------------------------------------------------------------------------------------------------------------------------------------------------------------------------------------------------|--------------------------------------------------------------------------------------------------------------------------------------------------------------------------------------------------------------------------------------------------------------------------------------------------------------------------------------------------------------------------------------------------------------------------------------------------------------------------------------------------------------------------------------------------------------------------------------------------------------------------------------------------------------------------------------------------------------------------------------------------------------------------------------------------------------------------------------------------------------------------------------------------------------------------------------------------------------------------------------------------------------------------------------------------------------------------------------------------------------------------------------------------------------------------------|-----------------------------------------------------------------------------------------------------------------------------------------------------------------------------------------------------------------------------------------------------------------------------------------------------------------------------------------------------------------------------------------------------------------------------------------------------------------------------------------------------------------------------------------------------------------------|
| <ul style="list-style-type: none"> <li><input type="radio"/> Trivial</li> <li><input type="radio"/> Small</li> <li><input type="radio"/> Moderate</li> <li><input checked="" type="radio"/> Large</li> <li><input type="radio"/> Varies</li> <li><input type="radio"/> Don't know</li> </ul> | <p><b>True Positive:</b> These are patients who have VWD and who received preventive and appropriate treatment. They benefit from decreasing the risk of bleeding with treatment and they suffer the side effects of treatment.</p> <p><b>True Negative:</b> These are patients who did not have VWD and who were correctly identified as not having the disease. They will appropriately not receive treatment for VWD and not suffer the side effects of treatment.</p> <p><b>False Negative:</b> These are patients who have VWD but the diagnosis was missed and will be sent home without appropriate treatment. They face the risks of prolonged and heavy bleeding due to not receiving treatment.</p> <p><b>False Positive:</b> These are individuals who do not have VWD but they will be labeled as potentially having a bleeding disorder by the BATs. Most of these patients will be reassured of not having VWD when they get additional blood testing. These patients may benefit from the treatment if they have other bleeding disorders, but they will also suffer the side effects of treatment.</p> <p>Refer to the Appendix at the end of the document</p> | <p>The benefit of a BAT is to identify patients who have VWD, who will be missed without this tool in the clinic. Using a BAT will allow for the quantification of bleeding symptoms in patients.</p> <p>The panel considered not missing a patient with VWD as the most important desirable effect, in addition to identify patients in a timely manner, in the appropriate center and to decrease unnecessary blood testing. BATs are educationally beneficial for patients and clinical experts and provides validation for patients about having the disease.</p> |

**Undesirable Effects**  
How substantial are the undesirable anticipated effects?

| JUDGEMENT | RESEARCH EVIDENCE | ADDITIONAL CONSIDERATIONS |
|-----------|-------------------|---------------------------|
|-----------|-------------------|---------------------------|

|                                                                                                                                                           |                                                                                                                                                                                                                                                                                                                                                                                                                                                                                                                                                                                                                                                                                                                                                                                                                                                                                                                                                                                                                                                                                                                                                                                |  |
|-----------------------------------------------------------------------------------------------------------------------------------------------------------|--------------------------------------------------------------------------------------------------------------------------------------------------------------------------------------------------------------------------------------------------------------------------------------------------------------------------------------------------------------------------------------------------------------------------------------------------------------------------------------------------------------------------------------------------------------------------------------------------------------------------------------------------------------------------------------------------------------------------------------------------------------------------------------------------------------------------------------------------------------------------------------------------------------------------------------------------------------------------------------------------------------------------------------------------------------------------------------------------------------------------------------------------------------------------------|--|
| <ul style="list-style-type: none"> <li>○ Large</li> <li>○ Moderate</li> <li>● Small</li> <li>○ Trivial</li> <li>○ Varies</li> <li>○ Don't know</li> </ul> | <p><b>True Positive:</b> These are patients who have VWD and who received preventive and appropriate treatment. They benefit from decreasing the risk of bleeding with treatment and they suffer the side effects of treatment.</p> <p><b>True Negative:</b> These are patients who did not have VWD and who were correctly identified as not having the disease. They will appropriately not receive treatment for VWD and not suffer the side effects of treatment.</p> <p><b>False Negative:</b> These are patients who have VWD but the diagnosis was missed and will be sent home without appropriate treatment. They face the risks of prolonged and heavy bleeding due to not receiving treatment.</p> <p><b>False Positive:</b> These are individuals who do not have VWD but they will be labeled as potentially having a bleeding disorder by the BATs. Most of these patients will be reassured of not having VWD when they get additional blood testing. These patients may benefit from the treatment if they have other bleeding disorders, but they will also suffer the side effects of treatment.</p> <p>Refer to the Appendix at the end of the document</p> |  |
|-----------------------------------------------------------------------------------------------------------------------------------------------------------|--------------------------------------------------------------------------------------------------------------------------------------------------------------------------------------------------------------------------------------------------------------------------------------------------------------------------------------------------------------------------------------------------------------------------------------------------------------------------------------------------------------------------------------------------------------------------------------------------------------------------------------------------------------------------------------------------------------------------------------------------------------------------------------------------------------------------------------------------------------------------------------------------------------------------------------------------------------------------------------------------------------------------------------------------------------------------------------------------------------------------------------------------------------------------------|--|

**Certainty of the evidence of test accuracy**  
 What is the overall certainty of the evidence of test accuracy?

| <b>JUDGEMENT</b>                                                                                                                               | <b>RESEARCH EVIDENCE</b>                                                                                                                                                                                                                                                                                                                                                                                                                                                           | <b>ADDITIONAL CONSIDERATIONS</b>                                                                                                                                                                                                                                                                                                         |
|------------------------------------------------------------------------------------------------------------------------------------------------|------------------------------------------------------------------------------------------------------------------------------------------------------------------------------------------------------------------------------------------------------------------------------------------------------------------------------------------------------------------------------------------------------------------------------------------------------------------------------------|------------------------------------------------------------------------------------------------------------------------------------------------------------------------------------------------------------------------------------------------------------------------------------------------------------------------------------------|
| <ul style="list-style-type: none"> <li>○ Very low</li> <li>○ Low</li> <li>● Moderate</li> <li>○ High</li> <li>○ No included studies</li> </ul> | <p>The risk of bias assessed using the QUADAS tool is not serious. Additionally, the articles addressed the PICO question directly and the results were precise. However, the point estimates of specificity are not homogenous which was not explained by the setting or risk of bias a priori. This gives an overall high certainty of evidence for sensitivity and moderate certainty of evidence for specificity.</p> <p>Refer to the Appendix at the end of the document.</p> | <p>The data presented in the studies consider mostly women. It is important also to consider BATs in the pediatric population, as children might have a negative bleeding score due to lack of adequate bleeding challenges. The bleeding score may become positive with age. Men are more likely to have a negative bleeding score.</p> |

**Certainty of the evidence of test's effects**  
 What is the overall certainty of the evidence for any critical or important direct benefits, adverse effects or burden of the test?

| <b>JUDGEMENT</b> | <b>RESEARCH EVIDENCE</b> | <b>ADDITIONAL CONSIDERATIONS</b> |
|------------------|--------------------------|----------------------------------|
|------------------|--------------------------|----------------------------------|

|                                                                                                                                                |                                                                                                               |  |
|------------------------------------------------------------------------------------------------------------------------------------------------|---------------------------------------------------------------------------------------------------------------|--|
| <ul style="list-style-type: none"> <li>○ Very low</li> <li>○ Low</li> <li>○ Moderate</li> <li>○ High</li> <li>● No included studies</li> </ul> | <p>There are no relevant test effects since the intervention is a questionnaire and not an invasive test.</p> |  |
|------------------------------------------------------------------------------------------------------------------------------------------------|---------------------------------------------------------------------------------------------------------------|--|

**Certainty of the evidence of management's effects**  
 What is the overall certainty of the evidence of effects of the management that is guided by the test results?

| JUDGEMENT                                                                                                                                      | RESEARCH EVIDENCE | ADDITIONAL CONSIDERATIONS                                                                                                                                                                                                                                                                                                                                                                                                                     |
|------------------------------------------------------------------------------------------------------------------------------------------------|-------------------|-----------------------------------------------------------------------------------------------------------------------------------------------------------------------------------------------------------------------------------------------------------------------------------------------------------------------------------------------------------------------------------------------------------------------------------------------|
| <ul style="list-style-type: none"> <li>○ Very low</li> <li>○ Low</li> <li>○ Moderate</li> <li>○ High</li> <li>● No included studies</li> </ul> |                   | <p>Despite the lack of included studies, there is <b>variability and inconsistency</b> in what happens to patients during their diagnostic journey.</p> <p>Early detection of mild disease may help in management, especially in women who face additional bleeding challenges during reproductive years.</p> <p>Patients in the primary care setting (pre-test probability 3%) who are not recognized as having VWD will not be treated.</p> |

**Certainty of the evidence of test result/management**  
 How certain is the link between test results and management decisions?

| JUDGEMENT                                                                                                                                      | RESEARCH EVIDENCE | ADDITIONAL CONSIDERATIONS                                                                                                                                                                                                                                                                                                                                                                                                                      |
|------------------------------------------------------------------------------------------------------------------------------------------------|-------------------|------------------------------------------------------------------------------------------------------------------------------------------------------------------------------------------------------------------------------------------------------------------------------------------------------------------------------------------------------------------------------------------------------------------------------------------------|
| <ul style="list-style-type: none"> <li>○ Very low</li> <li>○ Low</li> <li>○ Moderate</li> <li>○ High</li> <li>● No included studies</li> </ul> |                   | <p>The diagnosis of VWD is challenging and requires the performance of multiple laboratory tests, that will also determine the type of the disease. There are some limitations in laboratory diagnostic tests as well as overlapping nonspecific mild bleeding symptoms between healthy individuals and VWD patients.</p> <p>Conducting a Bleeding Assessment Tool will guide the healthcare provider to perform laboratory tests for VWD.</p> |

**Certainty of effects**  
 What is the overall certainty of the evidence of effects of the test?

| JUDGEMENT                                                                   | RESEARCH EVIDENCE                                        | ADDITIONAL CONSIDERATIONS |
|-----------------------------------------------------------------------------|----------------------------------------------------------|---------------------------|
| <ul style="list-style-type: none"> <li>○ Very low</li> <li>● Low</li> </ul> | <p>Refer to the Appendix at the end of the document.</p> |                           |

| <ul style="list-style-type: none"> <li>○ Moderate</li> <li>○ High</li> <li>○ No included studies</li> </ul>                                                                                                                                                      |                          |                                                                                                                                                                                                                                                                                                                                                                                                                                                                                                                                                                                                                                                                                                                                                                                                                                                                                                                                                                                                                                                                                                                                                                                                                                                                                                                                                                                                                                                                                                                                                                                                                             |
|------------------------------------------------------------------------------------------------------------------------------------------------------------------------------------------------------------------------------------------------------------------|--------------------------|-----------------------------------------------------------------------------------------------------------------------------------------------------------------------------------------------------------------------------------------------------------------------------------------------------------------------------------------------------------------------------------------------------------------------------------------------------------------------------------------------------------------------------------------------------------------------------------------------------------------------------------------------------------------------------------------------------------------------------------------------------------------------------------------------------------------------------------------------------------------------------------------------------------------------------------------------------------------------------------------------------------------------------------------------------------------------------------------------------------------------------------------------------------------------------------------------------------------------------------------------------------------------------------------------------------------------------------------------------------------------------------------------------------------------------------------------------------------------------------------------------------------------------------------------------------------------------------------------------------------------------|
| <b>Values</b><br>Is there important uncertainty about or variability in how much people value the main outcomes?                                                                                                                                                 |                          |                                                                                                                                                                                                                                                                                                                                                                                                                                                                                                                                                                                                                                                                                                                                                                                                                                                                                                                                                                                                                                                                                                                                                                                                                                                                                                                                                                                                                                                                                                                                                                                                                             |
| <b>JUDGEMENT</b>                                                                                                                                                                                                                                                 | <b>RESEARCH EVIDENCE</b> | <b>ADDITIONAL CONSIDERATIONS</b>                                                                                                                                                                                                                                                                                                                                                                                                                                                                                                                                                                                                                                                                                                                                                                                                                                                                                                                                                                                                                                                                                                                                                                                                                                                                                                                                                                                                                                                                                                                                                                                            |
| <ul style="list-style-type: none"> <li>○ Important uncertainty or variability</li> <li>○ Possibly important uncertainty or variability</li> <li>● Probably no important uncertainty or variability</li> <li>○ No important uncertainty or variability</li> </ul> |                          | <p>Patients place high value on being heard, not having their diagnosis missed, and having guidance on appropriate management.</p> <p>Patients value the clarity and precise questions provided by the BATs. They benefit from the standardized and objective way of obtaining bleeding data and would expect the use of non-standardized testing to be poorly received due to the perception of being less reliable.</p> <p>Moreover, patients appreciate their direct input into the collection of personal medical history for making or confirming a diagnosis. Patients think of BATs as similar to surveys given to patients for other diagnoses in internal medicine or family medicine. On the other hand, although BATs are useful adjunct, patients may feel that their story is devalued if reduced entirely to a questionnaire. Since the answers in a structured questionnaire are less subtle than in open questions, patients may prefer an open discussion with the healthcare provider, rather than only a structured questionnaire that may not account for all their bleeding symptoms. Patients might want to know that blood tests are negative even if they have a negative bleeding score, especially if they were told they have VWD, bringing a concern of underdiagnosis or overtreatment; so patients may value a blood test more than BATs for confirmation of diagnosis, regardless of the bleeding score. Finally, privacy and security of sensitive health data are concerns to some patients with online BATs, however there is no universal online BAT that is currently administered.</p> |
| <b>Balance of effects</b>                                                                                                                                                                                                                                        |                          |                                                                                                                                                                                                                                                                                                                                                                                                                                                                                                                                                                                                                                                                                                                                                                                                                                                                                                                                                                                                                                                                                                                                                                                                                                                                                                                                                                                                                                                                                                                                                                                                                             |



**Does the balance between desirable and undesirable effects favor the intervention or the comparison?**

| JUDGEMENT                                                                                                                                                                                                                                                                                                      | RESEARCH EVIDENCE                                        | ADDITIONAL CONSIDERATIONS                                                                                                                                                        |
|----------------------------------------------------------------------------------------------------------------------------------------------------------------------------------------------------------------------------------------------------------------------------------------------------------------|----------------------------------------------------------|----------------------------------------------------------------------------------------------------------------------------------------------------------------------------------|
| <ul style="list-style-type: none"> <li>○ Favors the comparison</li> <li>○ Probably favors the comparison</li> <li>○ Does not favor either the intervention or the comparison</li> <li>○ Probably favors the intervention</li> <li>● Favors the intervention</li> <li>○ Varies</li> <li>○ Don't know</li> </ul> | <p>Refer to the Appendix at the end of the document.</p> | <p>There is an increasing need to use validated, standardized and sensitive bleeding questionnaires to assist in the determination of both the presence and severity of VWD.</p> |

**Resources required**  
How large are the resource requirements (costs)?

| JUDGEMENT                                                                                                                                                                                                                      | RESEARCH EVIDENCE | ADDITIONAL CONSIDERATIONS                                                                                                                                                                                                                                           |
|--------------------------------------------------------------------------------------------------------------------------------------------------------------------------------------------------------------------------------|-------------------|---------------------------------------------------------------------------------------------------------------------------------------------------------------------------------------------------------------------------------------------------------------------|
| <ul style="list-style-type: none"> <li>○ Large costs</li> <li>○ Moderate costs</li> <li>○ Negligible costs and savings</li> <li>● Moderate savings</li> <li>○ Large savings</li> <li>○ Varies</li> <li>○ Don't know</li> </ul> |                   | <p>No additional financial resources are required to administer BATs, except time (including training/educating the provider to administer BATs), which is important in the clinical setting. Doing BATs in this population would lead to net moderate savings.</p> |

**Certainty of evidence of required resources**  
What is the certainty of the evidence of resource requirements (costs)?

| JUDGEMENT | RESEARCH EVIDENCE | ADDITIONAL CONSIDERATIONS |
|-----------|-------------------|---------------------------|
|-----------|-------------------|---------------------------|

|                                                                                                                                                |  |  |
|------------------------------------------------------------------------------------------------------------------------------------------------|--|--|
| <ul style="list-style-type: none"> <li>○ Very low</li> <li>○ Low</li> <li>○ Moderate</li> <li>○ High</li> <li>● No included studies</li> </ul> |  |  |
|------------------------------------------------------------------------------------------------------------------------------------------------|--|--|

**Cost effectiveness**  
Does the cost-effectiveness of the intervention favor the intervention or the comparison?

| <b>JUDGEMENT</b>                                                                                                                                                                                                                                                                                                        | <b>RESEARCH EVIDENCE</b> | <b>ADDITIONAL CONSIDERATIONS</b> |
|-------------------------------------------------------------------------------------------------------------------------------------------------------------------------------------------------------------------------------------------------------------------------------------------------------------------------|--------------------------|----------------------------------|
| <ul style="list-style-type: none"> <li>○ Favors the comparison</li> <li>○ Probably favors the comparison</li> <li>○ Does not favor either the intervention or the comparison</li> <li>○ Probably favors the intervention</li> <li>○ Favors the intervention</li> <li>○ Varies</li> <li>● No included studies</li> </ul> |                          |                                  |

**Equity**  
What would be the impact on health equity?

| <b>JUDGEMENT</b>                                                                                                                                                                                                 | <b>RESEARCH EVIDENCE</b> | <b>ADDITIONAL CONSIDERATIONS</b>                                                                                                                                                                                                                                                                 |
|------------------------------------------------------------------------------------------------------------------------------------------------------------------------------------------------------------------|--------------------------|--------------------------------------------------------------------------------------------------------------------------------------------------------------------------------------------------------------------------------------------------------------------------------------------------|
| <ul style="list-style-type: none"> <li>○ Reduced</li> <li>○ Probably reduced</li> <li>○ Probably no impact</li> <li>● Probably increased</li> <li>○ Increased</li> <li>○ Varies</li> <li>○ Don't know</li> </ul> |                          | <p>BATs are generally available for all patients, which might help patients receive equitable care.</p> <p>More work has been done with BATs in English language than other languages, although the ISTH-BAT has been translated and is available in German, Italian, Norwegian and Spanish.</p> |

| Acceptability                                                                                                                                                                                                                                                                                   |                   |                                                                                                                                                                                                                                                                                                                                                                                                                                                                                                                                                                                                                                                                                                                                                                                                                                                                                                                                                                                                                                                                                                                                                                                                                                                                                                                           |
|-------------------------------------------------------------------------------------------------------------------------------------------------------------------------------------------------------------------------------------------------------------------------------------------------|-------------------|---------------------------------------------------------------------------------------------------------------------------------------------------------------------------------------------------------------------------------------------------------------------------------------------------------------------------------------------------------------------------------------------------------------------------------------------------------------------------------------------------------------------------------------------------------------------------------------------------------------------------------------------------------------------------------------------------------------------------------------------------------------------------------------------------------------------------------------------------------------------------------------------------------------------------------------------------------------------------------------------------------------------------------------------------------------------------------------------------------------------------------------------------------------------------------------------------------------------------------------------------------------------------------------------------------------------------|
| Is the intervention acceptable to key stakeholders?                                                                                                                                                                                                                                             |                   |                                                                                                                                                                                                                                                                                                                                                                                                                                                                                                                                                                                                                                                                                                                                                                                                                                                                                                                                                                                                                                                                                                                                                                                                                                                                                                                           |
| JUDGEMENT                                                                                                                                                                                                                                                                                       | RESEARCH EVIDENCE | ADDITIONAL CONSIDERATIONS                                                                                                                                                                                                                                                                                                                                                                                                                                                                                                                                                                                                                                                                                                                                                                                                                                                                                                                                                                                                                                                                                                                                                                                                                                                                                                 |
| <ul style="list-style-type: none"> <li><input type="radio"/> No</li> <li><input type="radio"/> Probably no</li> <li><input type="radio"/> Probably yes</li> <li><input checked="" type="radio"/> Yes</li> <li><input type="radio"/> Varies</li> <li><input type="radio"/> Don't know</li> </ul> |                   | <p>BATs are generally accepted by all patients. The panel thinks that BATs are usually less acceptable in the primary care setting due to the type of relationship between the primary care physician and their patient, which makes the questionnaire less likely to be completed.</p>                                                                                                                                                                                                                                                                                                                                                                                                                                                                                                                                                                                                                                                                                                                                                                                                                                                                                                                                                                                                                                   |
| Feasibility                                                                                                                                                                                                                                                                                     |                   |                                                                                                                                                                                                                                                                                                                                                                                                                                                                                                                                                                                                                                                                                                                                                                                                                                                                                                                                                                                                                                                                                                                                                                                                                                                                                                                           |
| Is the intervention feasible to implement?                                                                                                                                                                                                                                                      |                   |                                                                                                                                                                                                                                                                                                                                                                                                                                                                                                                                                                                                                                                                                                                                                                                                                                                                                                                                                                                                                                                                                                                                                                                                                                                                                                                           |
| JUDGEMENT                                                                                                                                                                                                                                                                                       | RESEARCH EVIDENCE | ADDITIONAL CONSIDERATIONS                                                                                                                                                                                                                                                                                                                                                                                                                                                                                                                                                                                                                                                                                                                                                                                                                                                                                                                                                                                                                                                                                                                                                                                                                                                                                                 |
| <ul style="list-style-type: none"> <li><input type="radio"/> No</li> <li><input type="radio"/> Probably no</li> <li><input type="radio"/> Probably yes</li> <li><input type="radio"/> Yes</li> <li><input checked="" type="radio"/> Varies</li> <li><input type="radio"/> Don't know</li> </ul> |                   | <p>BATs might be less feasible in the primary care setting because of the need for additional resources (ie: time) when administering the questionnaire although this varies depending on the setting.</p> <p>With minimal training, the BATs may be administered by any healthcare professional (usually nursing staff or clinicians); self-administered versions are also available for patients to complete unassisted. The healthcare professional should be very familiar with bleeding disorders to tease out information from the patient who may not realize that they have more symptoms than they appreciate. If administered by clinicians, the tool needs to have minimal risk of interpretation errors such as subjective judgment differences between clinicians. The Self-BAT minimizes the errors using lay terms without complex definitions and criteria.</p> <p>The data are collected through paper or electronic record after face to face or phone interview. Currently, paper-based is the most used way of collecting the data, computer-assisted BATs to rapidly pass through negative domains would be useful while taking into consideration the resource implications.</p> <p>It usually takes 10-20 minutes to complete the BAT, but may take up to 30 minutes depending on the version.</p> |

|  |  |                                                                                                                                                                                                                                                                                                                                                                                                                                                                                                                                                                                                                                                                                                                                                                                                                                                                                                                              |
|--|--|------------------------------------------------------------------------------------------------------------------------------------------------------------------------------------------------------------------------------------------------------------------------------------------------------------------------------------------------------------------------------------------------------------------------------------------------------------------------------------------------------------------------------------------------------------------------------------------------------------------------------------------------------------------------------------------------------------------------------------------------------------------------------------------------------------------------------------------------------------------------------------------------------------------------------|
|  |  | <p>Time use may have a feasibility implication, but the panel felt BATs are often quicker than unstructured history for bleeding symptoms. BATs become time-consuming specifically when administered by the nursing staff seeing a large volume of patients. The question tackles using BATs in secondary care. The primary screening would have been already performed by the primary care provider. This means that the incidence of bleeding problems is increased and the ability of the BATs alone to exclude a bleeding problem is limited (like d-dimer for thrombosis). The current BATs (e.g. ISTH, Self BAT, PBQ, etc) were not developed to serve primarily as a diagnostic tool, but to stratify patients in large cohort studies. Although a normal bleeding score and negative screening tests mean that no additional testing is needed, a normal bleeding score is not enough to rule out the diagnosis.</p> |
|--|--|------------------------------------------------------------------------------------------------------------------------------------------------------------------------------------------------------------------------------------------------------------------------------------------------------------------------------------------------------------------------------------------------------------------------------------------------------------------------------------------------------------------------------------------------------------------------------------------------------------------------------------------------------------------------------------------------------------------------------------------------------------------------------------------------------------------------------------------------------------------------------------------------------------------------------|

#### SUMMARY OF JUDGEMENTS

|                                                          | JUDGEMENT       |             |                 |               |  |        |                            |
|----------------------------------------------------------|-----------------|-------------|-----------------|---------------|--|--------|----------------------------|
| <b>PROBLEM</b>                                           | No              | Probably no | Probably yes    | <b>Yes</b>    |  | Varies | Don't know                 |
| <b>TEST ACCURACY</b>                                     | Very inaccurate | Inaccurate  | <b>Accurate</b> | Very accurate |  | Varies | Don't know                 |
| <b>DESIRABLE EFFECTS</b>                                 | Trivial         | Small       | Moderate        | <b>Large</b>  |  | Varies | Don't know                 |
| <b>UNDESIRABLE EFFECTS</b>                               | Large           | Moderate    | <b>Small</b>    | Trivial       |  | Varies | Don't know                 |
| <b>CERTAINTY OF THE EVIDENCE OF TEST ACCURACY</b>        | Very low        | Low         | <b>Moderate</b> | High          |  |        | No included studies        |
| <b>CERTAINTY OF THE EVIDENCE OF TEST'S EFFECTS</b>       | Very low        | Low         | Moderate        | High          |  |        | <b>No included studies</b> |
| <b>CERTAINTY OF THE EVIDENCE OF MANAGEMENT'S EFFECTS</b> | Very low        | Low         | Moderate        | High          |  |        | <b>No included studies</b> |

|                                                     | JUDGEMENT                            |                                               |                                                          |                                         |                                |               |                     |
|-----------------------------------------------------|--------------------------------------|-----------------------------------------------|----------------------------------------------------------|-----------------------------------------|--------------------------------|---------------|---------------------|
| CERTAINTY OF THE EVIDENCE OF TEST RESULT/MANAGEMENT | Very low                             | Low                                           | Moderate                                                 | High                                    |                                |               | No included studies |
| CERTAINTY OF EFFECTS                                | Very low                             | <b>Low</b>                                    | Moderate                                                 | High                                    |                                |               | No included studies |
| VALUES                                              | Important uncertainty or variability | Possibly important uncertainty or variability | <b>Probably no important uncertainty or variability</b>  | No important uncertainty or variability |                                |               |                     |
| BALANCE OF EFFECTS                                  | Favors the comparison                | Probably favors the comparison                | Does not favor either the intervention or the comparison | Probably favors the intervention        | <b>Favors the intervention</b> | Varies        | Don't know          |
| RESOURCES REQUIRED                                  | Large costs                          | Moderate costs                                | Negligible costs and savings                             | <b>Moderate savings</b>                 | Large savings                  | Varies        | Don't know          |
| CERTAINTY OF EVIDENCE OF REQUIRED RESOURCES         | Very low                             | Low                                           | Moderate                                                 | High                                    |                                |               | No included studies |
| COST EFFECTIVENESS                                  | Favors the comparison                | Probably favors the comparison                | Does not favor either the intervention or the comparison | Probably favors the intervention        | Favors the intervention        | Varies        | No included studies |
| EQUITY                                              | Reduced                              | Probably reduced                              | Probably no impact                                       | <b>Probably increased</b>               | Increased                      | Varies        | Don't know          |
| ACCEPTABILITY                                       | No                                   | Probably no                                   | Probably yes                                             | <b>Yes</b>                              |                                | Varies        | Don't know          |
| FEASIBILITY                                         | No                                   | Probably no                                   | Probably yes                                             | Yes                                     |                                | <b>Varies</b> | Don't know          |

#### TYPE OF RECOMMENDATION

|                                                |                                                     |                                                                          |                                                 |                                                   |
|------------------------------------------------|-----------------------------------------------------|--------------------------------------------------------------------------|-------------------------------------------------|---------------------------------------------------|
| Strong recommendation against the intervention | Conditional recommendation against the intervention | Conditional recommendation for either the intervention or the comparison | Conditional recommendation for the intervention | <b>Strong recommendation for the intervention</b> |
|------------------------------------------------|-----------------------------------------------------|--------------------------------------------------------------------------|-------------------------------------------------|---------------------------------------------------|

|   |   |   |   |   |
|---|---|---|---|---|
| ○ | ○ | ○ | ○ | ● |
|---|---|---|---|---|

## CONCLUSIONS

### Recommendation

In patients with a low probability of VWD (e.g. evaluation triggered by a prolonged aPTT), the panel recommends using a bleeding assessment tool (BAT) as an initial screening test to determine who needs specific blood testing over non-standardized clinical assessment.  
(Strong recommendation based on moderate certainty in the evidence)

#### Remarks:

- This recommendation addresses patients with a low VWD pretest probability (~3%), corresponding to those typically seen in the primary care setting.
- The quality of non-standardized clinical assessment will vary among the users of these guidelines.
- Specific blood testing for VWD refers to VWF:Ag, VWF activity and FVIII:C.

### Justification

The guideline panel determined that there is moderate certainty in the evidence for a net health benefit from using BATs over no BATs in patients suspected of VWD with a history of abnormal blood laboratory results. Other EtD criteria were generally in favor of using BATs so that the desirable consequences were greater than the undesirable consequences.

### Subgroup considerations

### Implementation considerations

### Monitoring and evaluation

## Research priorities

- Studies regarding pediatric use of BATs.
- Studies regarding BATs use in adolescent males and females.

## APPENDIX

### 1. Risk of Bias:

| Author           | Year | Patient Selection Risk of bias | Index test Risk of bias | Reference test Risk of bias | Flow and timing Risk of bias |
|------------------|------|--------------------------------|-------------------------|-----------------------------|------------------------------|
| Bowman, M.       | 2008 | Low                            | Low                     | Low                         | Low                          |
| Bowman, M.       | 2009 | Low                            | Low                     | Low                         | Low                          |
| Deforest, M.     | 2015 | Low                            | Low                     | Low                         | Low                          |
| Malec, L. M.     | 2016 | Low                            | Low                     | Low                         | Low                          |
| Marcus, P. D     | 2011 | Low                            | Low                     | Low                         | Low                          |
| Bidlingmaier, C. | 2012 | Low                            | Low                     | Low                         | Low                          |
| Philipp, C. S.   | 2008 | Moderate                       | Moderate                | Low                         | Low                          |
| Faiz, A.         | 2017 | High                           | Low                     | Moderate                    | Low                          |
| Belen, B.        | 2015 | High                           | Low                     | Low                         | Low                          |
| Mittal, N.       | 2015 | High                           | Moderate                | High                        | Low                          |
| Pathare, A.      | 2018 | High                           | Moderate                | Low                         | Low                          |
| Bujnicki, H. C.  | 2011 | High                           | Moderate                | High                        | Low                          |
| Rodeghiero, F.   | 2005 | High                           | Moderate                | Moderate                    | Low                          |

### 2. Test Accuracy Results

| ID  | Author           | Year | Study Design            | Number of patients | TP | FN | FP | TN | Sens  | Low CI | Up CI | Spec  | Low CI | Up CI | Prevalence |
|-----|------------------|------|-------------------------|--------------------|----|----|----|----|-------|--------|-------|-------|--------|-------|------------|
| 629 | Bidlingmaier, C. | 2012 | Cohort with DTA results | 100                | 18 | 5  | 11 | 66 | 0.783 | 0.572  | 0.907 | 0.857 | 0.76   | 0.919 | 23%        |

|     |                 |      |                         |      |    |    |     |      |       |       |       |       |       |       |     |
|-----|-----------------|------|-------------------------|------|----|----|-----|------|-------|-------|-------|-------|-------|-------|-----|
| 795 | Bowman, M.      | 2008 | Cohort with DTA results | 217  | 7  | 0  | 28  | 182  | 0.937 | 0.461 | 0.996 | 0.865 | 0.812 | 0.905 | 3%  |
| 620 | Bowman, M.      | 2009 | Cohort with DTA results | 151  | 5  | 1  | 31  | 114  | 0.833 | 0.369 | 0.977 | 0.786 | 0.712 | 0.845 | 3%  |
| 488 | Deforest, M.    | 2015 | Cohort with DTA results | 64   | 7  | 2  | 40  | 15   | 0.778 | 0.421 | 0.944 | 0.273 | 0.172 | 0.404 | 14% |
| 446 | Malec, L. M.    | 2016 | Cohort with DTA results | 193  | 32 | 15 | 96  | 50   | 0.681 | 0.536 | 0.798 | 0.342 | 0.27  | 0.423 | 22% |
| 681 | Marcus, P. D    | 2011 | Cohort with DTA results | 104  | 7  | 1  | 67  | 29   | 0.875 | 0.463 | 0.983 | 0.302 | 0.219 | 0.401 | 8%  |
| 135 | Philipp, C. S.  | 2008 | Cohort with DTA results | 146  | 10 | 2  | 107 | 27   | 0.833 | 0.523 | 0.958 | 0.201 | 0.142 | 0.278 | 8%  |
| 146 | Faiz, A.        | 2017 | Case Control            | 53   | 21 | 5  | 19  | 8    | 0.808 | 0.613 | 0.918 | 0.296 | 0.156 | 0.49  | 27% |
| 407 | Belen, B.       | 2015 | Case Control            | 84   | 46 | 0  | 15  | 17   | 0.989 | 0.851 | 0.999 | 0.53  | 0.363 | 0.691 | 25% |
| 710 | Mittal, N.      | 2015 | Case Control            | 1316 | 34 | 1  | 36  | 1245 | 0.971 | 0.823 | 0.996 | 0.972 | 0.961 | 0.98  | 3%  |
| 673 | Pathare, A.     | 2018 | Case Control            | 96   | 33 | 13 | 8   | 42   | 0.717 | 0.572 | 0.828 | 0.84  | 0.711 | 0.918 | 48% |
| 585 | Bujnicki, H. C. | 2011 | Case control            | 160  | 75 | 5  | 4   | 76   | 0.937 | 0.858 | 0.974 | 0.95  | 0.874 | 0.981 | 50% |
| 260 | Rodeghiero, F.  | 2005 | Case Control            | 341  | 81 | 2  | 45  | 213  | 0.976 | 0.909 | 0.994 | 0.826 | 0.774 | 0.867 | 25% |

| Studies                                     | Estimate (95% C.I.)         | TP/(TP + FN)  |
|---------------------------------------------|-----------------------------|---------------|
| Bowman, M. (C, MCMDM-1) 2008                | 0.938 (0.461, 0.996)        | 7/7           |
| Bowman, M., (C, PBQ) 2009                   | 0.833 (0.369, 0.977)        | 5/6           |
| Deforest, M., A., (C, Self BAT) 2015        | 0.778 (0.421, 0.944)        | 7/9           |
| Malec, L. M., (C, Composite score) 2016     | 0.681 (0.536, 0.798)        | 32/47         |
| Marcus, P. D., (C, Modified Vicenza) 2011   | 0.875 (0.463, 0.983)        | 7/8           |
| Philipp, C. S. (C, Questionnaire) 2008      | 0.833 (0.523, 0.958)        | 10/12         |
| Bidlingmaier, C. (C, ISTH Child BS) 2012    | 0.783 (0.572, 0.907)        | 18/23         |
| <b>Overall (I<sup>2</sup>=0 %, P=0.698)</b> | <b>0.752 (0.661, 0.826)</b> | <b>86/112</b> |

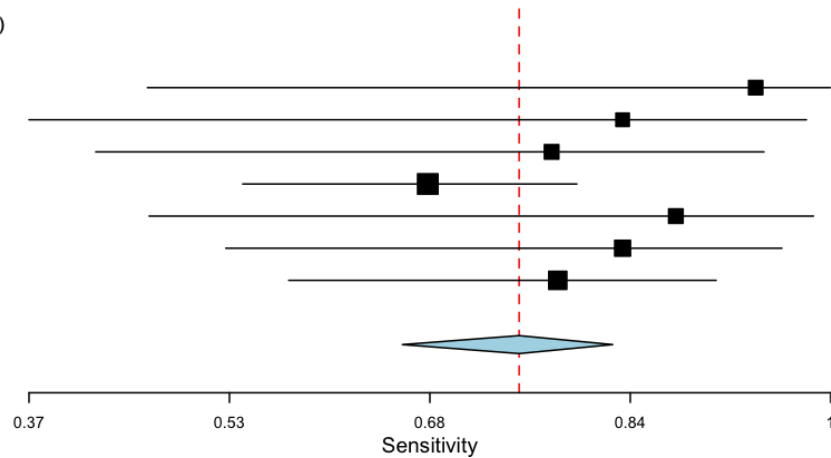



| Studies                                            | Estimate (95% C.I.)         | TN/(FP + TN)   |
|----------------------------------------------------|-----------------------------|----------------|
| Bowman, M. (C, MCMDM-1) 2008                       | 0.865 (0.812, 0.905)        | 182/210        |
| Bowman, M., (C, PBQ) 2009                          | 0.786 (0.712, 0.845)        | 114/145        |
| Deforest, M., A., (C, Self BAT) 2015               | 0.273 (0.172, 0.404)        | 15/55          |
| Malec, L. M., (C, Composite score) 2016            | 0.342 (0.270, 0.423)        | 50/146         |
| Marcus, P. D., (C, Modified Vicenza) 2011          | 0.302 (0.219, 0.401)        | 29/96          |
| Philipp, C. S. (C, Questionnaire) 2008             | 0.201 (0.142, 0.278)        | 27/134         |
| Bidlingmaier, C. (C, ISTH Child BS) 2012           | 0.857 (0.760, 0.919)        | 66/77          |
| <b>Overall (I<sup>2</sup>=9744 %, P&lt; 0.001)</b> | <b>0.539 (0.293, 0.767)</b> | <b>483/863</b> |

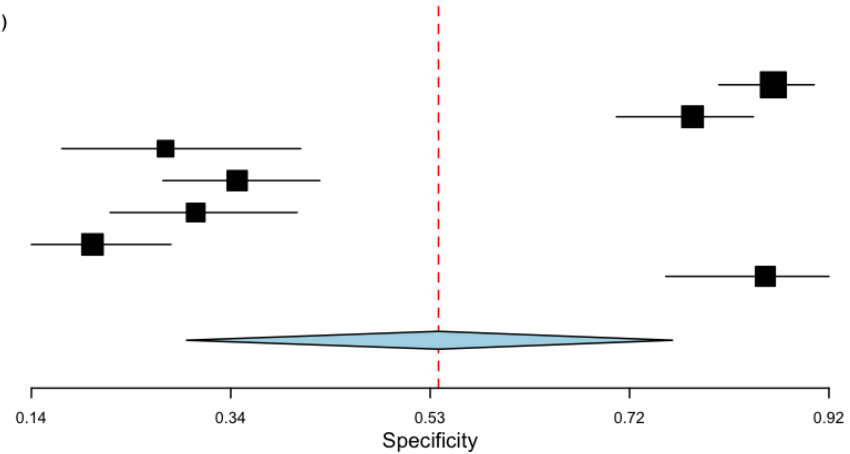

### 3. Outcomes:

- For overall population
  - Evidence profile:

|             |                             |
|-------------|-----------------------------|
| Sensitivity | 0.75 (95% CI: 0.66 to 0.83) |
| Specificity | 0.54 (95% CI: 0.29 to 0.77) |

|             |    |     |     |
|-------------|----|-----|-----|
| Prevalences | 3% | 20% | 50% |
|-------------|----|-----|-----|

| Outcome                                                                | No of studies (No of patients) | Study design                                 | Factors that may decrease certainty of evidence |              |               |             |                  | Effect per 1,000 patients tested        |                                          |                                          | Test accuracy CoE |
|------------------------------------------------------------------------|--------------------------------|----------------------------------------------|-------------------------------------------------|--------------|---------------|-------------|------------------|-----------------------------------------|------------------------------------------|------------------------------------------|-------------------|
|                                                                        |                                |                                              | Risk of bias                                    | Indirectness | Inconsistency | Imprecision | Publication bias | pre-test probability of 3% <sup>b</sup> | pre-test probability of 20% <sup>c</sup> | pre-test probability of 50% <sup>d</sup> |                   |
| <b>True positives</b> (patients with suspected patients)               | 7 studies<br>112 patients      | cross-sectional (cohort type accuracy study) | not serious                                     | not serious  | not serious   | not serious | none             | 23 (20 to 25)                           | 150 (132 to 165)                         | 376 (331 to 413)                         | ⊕⊕⊕⊕<br>HIGH      |
| <b>False negatives</b> (patients incorrectly classified as not having) |                                |                                              |                                                 |              |               |             |                  | 7 (5 to 10)                             | 50 (35 to 68)                            | 124 (87 to 169)                          |                   |

| Outcome                                                                               | No of studies (No of patients) | Study design                                 | Factors that may decrease certainty of evidence |              |                      |             |                  | Effect per 1,000 patients tested        |                                          |                                          | Test accuracy CoE |
|---------------------------------------------------------------------------------------|--------------------------------|----------------------------------------------|-------------------------------------------------|--------------|----------------------|-------------|------------------|-----------------------------------------|------------------------------------------|------------------------------------------|-------------------|
|                                                                                       |                                |                                              | Risk of bias                                    | Indirectness | Inconsistency        | Imprecision | Publication bias | pre-test probability of 3% <sup>b</sup> | pre-test probability of 20% <sup>c</sup> | pre-test probability of 50% <sup>d</sup> |                   |
| suspected patients)                                                                   |                                |                                              |                                                 |              |                      |             |                  |                                         |                                          |                                          |                   |
| <b>True negatives</b> (patients without suspected patients)                           | 7 studies<br>863 patients      | cross-sectional (cohort type accuracy study) | not serious                                     | not serious  | serious <sup>a</sup> | not serious | none             | 523 (284 to 744)                        | 431 (234 to 614)                         | 270 (147 to 384)                         | ⊕⊕⊕○<br>MODERATE  |
| <b>False positives</b> (patients incorrectly classified as having suspected patients) |                                |                                              |                                                 |              |                      |             |                  | 447 (226 to 686)                        | 369 (186 to 566)                         | 230 (116 to 353)                         |                   |

*Explanations*

- a. The point estimates of specificity are not homogenous which was not explained by the setting or risk of bias a priori .
- b. Typically seen in patients investigated for VWD because of a personal history of abnormal laboratory test (e.g., increased PTT).
- c. Typically seen in patients investigated for VWD because of a personal history of bleeding symptoms (e.g., mucocutaneous bleeding). - Quiroga, 2007.
- d. Typically seen in in patients investigated for VWD as a first degree relative for a patient with VWD.

- For a pre-test probability of 3%, which is typically seen in patients investigated for VWD because of a personal history of abnormal laboratory test (e.g., increased PTT):

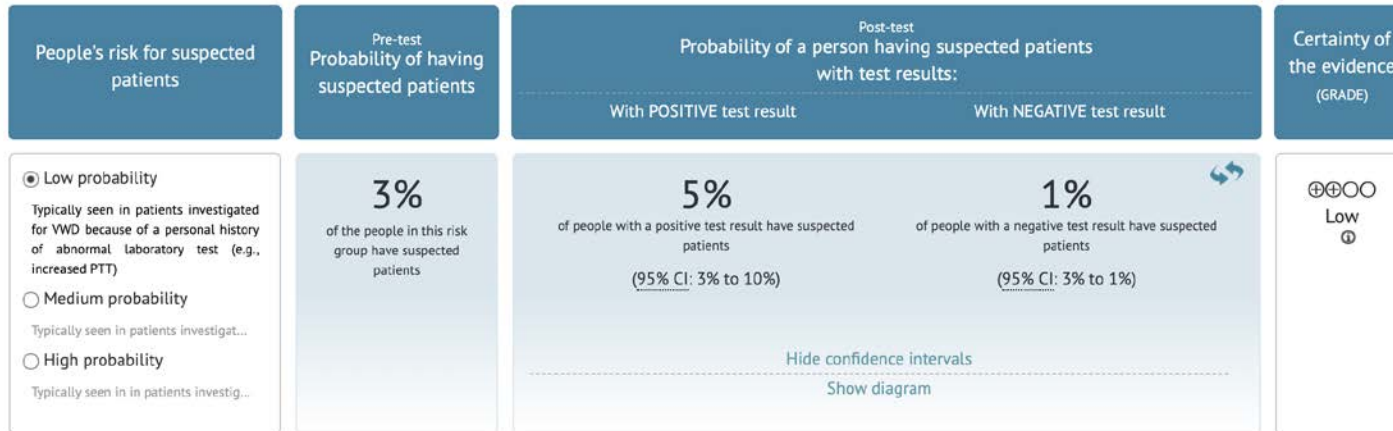

- . Out of 100 people with a positive BAT, **5** would actually have VWD and **95** would not have VWD
- . Out of 100 people with a negative BAT, **1** would actually have VWD and **99** would not have VWD

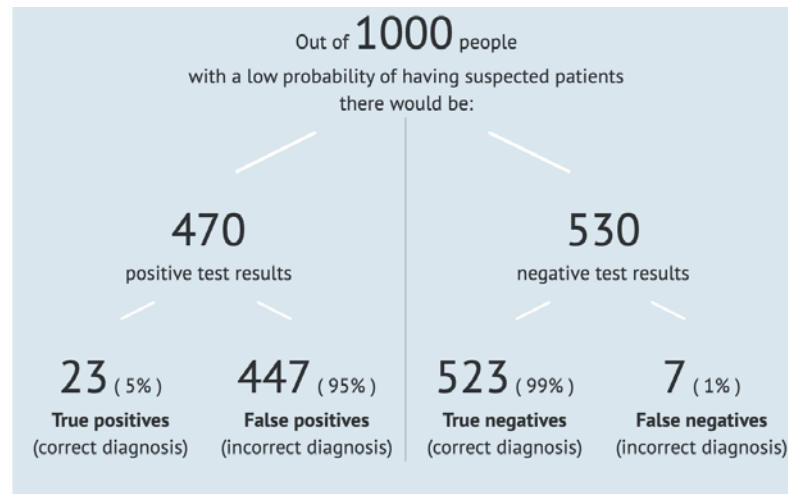

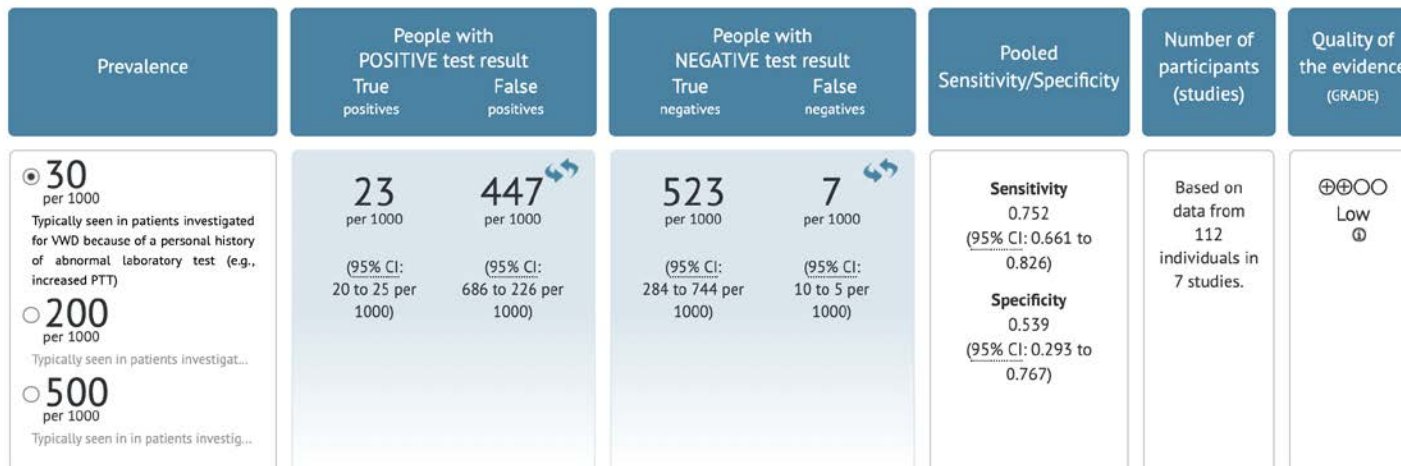

- . 470 out of 1000 people tested with BAT will have a "positive" test result: 23 of these will have VWD (true positive), However, 447 of these people will not have VWD, even though their test result was positive (false positive).
- . 530 out of 1000 people tested with BAT will have a "negative" test result. 523 of these will not have VWD (true negative). However, 7 of these people will actually have VWD, even though their test result was negative (false negative).

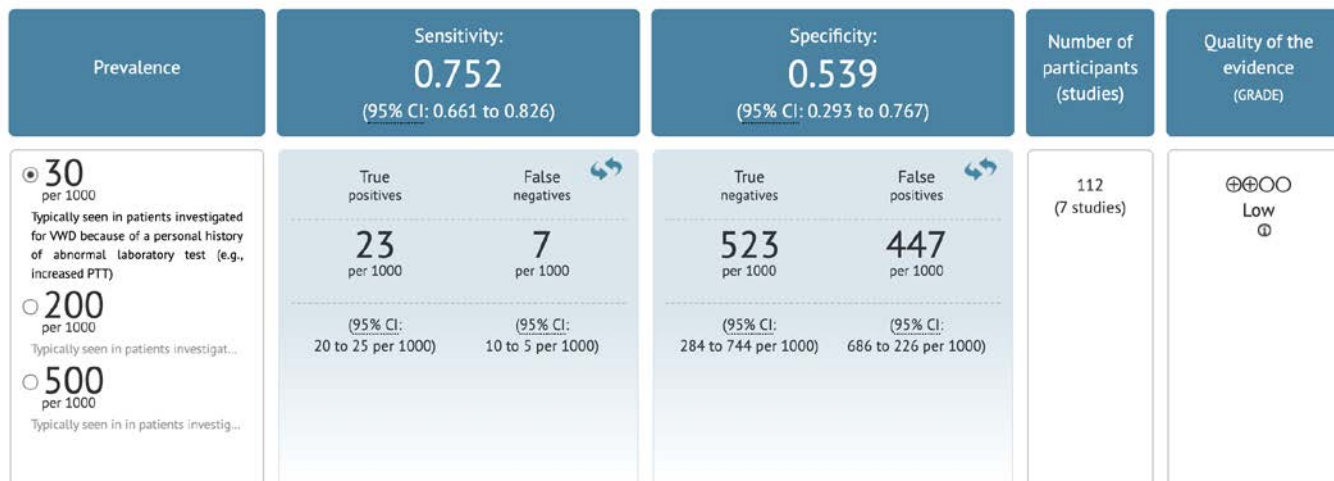

- . 30 people (out of 1000 people in the Low probability group) have (as yet undetected) VWD. Of the 1000 people who take Bleeding Assessment tool test: 23 people will be correctly identified as having VWD (true positives). However, 7 people with VWD will remain undetected; their "negative" BAT results will be incorrect (false negatives).
- . 970 people (out of 1000 people in the Low probability group) do not have VWD. Of the 1000 people who take the Bleeding Assessment tool test: 523 of these people will be correctly identified as not having VWD (true negatives). However, 447 people will be incorrectly identified; their "positive" test results will suggest they have VWD (false positives).

- For the pre-test probability of 20%, which is typically seen in patients investigated for VWD because of a personal history of bleeding symptoms (e.g., mucocutaneous bleeding), and the pre-test probability of 50%, which is typically seen in in patients investigated for VWD as a first degree relative for a patient with VWD, the interactive summary of findings can be accessed using the following link:

[https://gdt.gradeapro.org/presentations/#/isof/isof\\_c5b33e22-a646-4654-9f09-b820aff36c5c-1569520689536? k=eump67](https://gdt.gradeapro.org/presentations/#/isof/isof_c5b33e22-a646-4654-9f09-b820aff36c5c-1569520689536? k=eump67)

## References:

1. Pathare A, Al Hajri, F., Al Omrani, S., Al Obaidani, N., Al Balushi, B., Al Falahi, K. Bleeding score in type 1 von Willebrand disease patients using the condensed MCMDM-1 vWD validated questionnaire. *International Journal of Laboratory Hematology*. 2018;40(5):515-520.
2. A. S. K. Faiz A, Guo, S., Murphy, S., Philipp, C. S. Screening of female family members of von Willebrand disease patients: utility of a modified screening tool in a high-risk population. *Haemophilia* 2017;23(5):736-742.
3. Malec LM, Moore, C. G., Bennett, C. M., Yee, D. L., Kerlin, B. A., Witmer, C. M., Kulkarni, R., Gupta, S., Gunawardena, S., Kouides, P. A., Brown, D., Ragni, M. V. Validation study of the composite score to identify von Willebrand disease in children. *Journal of Pediatric Hematology/Oncology*. 2016;38(2):139-140.
4. Mittal N, Naridze, R., James, P., Shott, S., Valentino, L. A. Utility of a Paediatric Bleeding Questionnaire as a screening tool for von Willebrand disease in apparently healthy children. *Haemophilia*. 2015;21(6):806-811.
5. Deforest M, Grabell, J., Albert, S., Young, J., Tuttle, A., Hopman, W. M., James, P. D. Generation and optimization of the self-administered bleeding assessment tool and its validation as a screening test for von Willebrand disease. *Haemophilia*. 2015;21(5):e384-e388.
6. Belen B, Kocak, U., Isik, M., Keskin, E. Y., Oner, N., Sal, E., Kaya, Z., Yenicesu, I., Gursel, T. Evaluation of Pediatric Bleeding Questionnaire in Turkish Children with von Willebrand Disease and Platelet Function Disorders. *Clinical and Applied Thrombosis/Hemostasis*. 2015;21(6):565-569.
7. Bidlingmaier C, Grote, V., Budde, U., Olivieri, M., Kurnik, K. Prospective evaluation of a pediatric bleeding questionnaire and the ISTH bleeding assessment tool in children and parents in routine clinical practice. *Journal of Thrombosis and Haemostasis*. 2012;10(7):1335-1341.
8. Marcus PD, Nire, K. G., Grooms, L., Klima, J., O'Brien S, H. The power of a standardized bleeding score in diagnosing paediatric type 1 von Willebrand's disease and platelet function defects. *Haemophilia*. 2011;17(2):223-227.
9. Bujnicki HC, Sidonio, R. F., Kempton, C., Kouides, P. A., Kulkarni, R., Nugent, D. J., Yee, D. L., Moore, C. G., Ragni, M. V. Screening for von Willebrand disease in children: a case-control study. *J Thromb Haemost*. 2011;9(5):1086-1089.
10. Bowman M, Riddel, J., Rand, M. L., Tosetto, A., Silva, M., James, P. D. Evaluation of the diagnostic utility for von Willebrand disease of a pediatric bleeding questionnaire. *Journal of Thrombosis and Haemostasis*. 2009;7(8):1418-1421.
11. Tosetto A, Castaman, G., Rodeghiero, F. Evidence-based diagnosis of type 1 von Willebrand disease: A Bayes theorem approach. *Blood*. 2008;111(8):3998-4003.
12. Philipp CS, Faiz, A., Dowling, N. F., Beckman, M., Owens, S., Ayers, C., Bachmann, G. Development of a screening tool for identifying women with menorrhagia for hemostatic evaluation. *American Journal of Obstetrics and Gynecology*. 2008;198(2):163.e161-163.e168.
13. Bowman M, Mundell, G., Grabell, J., Hopman, W. M., Rapson, D., Lillicrap, D., James, P. Generation and validation of the Condensed MCMDM-1VWD Bleeding Questionnaire for von Willebrand disease. *Journal of Thrombosis and Haemostasis*. 2008;6(12):2062-2066.
14. Tosetto A, Rodeghiero, F., Castaman, G., Goodeve, A., Federici, A. B., Batlle, J., Meyer, D., Fressinaud, E., Mazurier, C., Goudemand, J., Eikenboom, J., Schneppenheim, R., Budde, U., Ingerslev, J., Vorlova, Z., Habart, D., Holmberg, L., Lethagen, S., Pasi, J., Hill, F., Peake, I. A quantitative analysis of bleeding symptoms in type 1 von Willebrand disease: Results from a multicenter European study (MCMDM-1 VWD). *Journal of Thrombosis and Haemostasis*. 2006;4(4):766-773.
15. Rodeghiero F, Castaman, G., Tosetto, A., Batlle, J., Baudo, F., Cappelletti, A., Casana, P., De Bosch, N., Eikenboom, J. C., Federici, A. B., Lethagen, S., Linari, S., Srivastava, A. The discriminant power of bleeding history for the diagnosis of type 1 von Willebrand disease: an international, multicenter study.[Erratum appears in *J Thromb Haemost*. 2006 Apr;4(4):925]. *J Thromb Haemost*. 2005;3(12):2619-2626.

**Question 1 and 2 (20%)**

| Should a bleeding assessment tool be used to diagnose patients suspected of having von Willebrand Disease? |                                                                                                                                                                                                                                                                                                                                                                                                                                                                                                                                                                                                       |
|------------------------------------------------------------------------------------------------------------|-------------------------------------------------------------------------------------------------------------------------------------------------------------------------------------------------------------------------------------------------------------------------------------------------------------------------------------------------------------------------------------------------------------------------------------------------------------------------------------------------------------------------------------------------------------------------------------------------------|
| <b>POPULATION:</b>                                                                                         | Patients suspected of von Willebrand Disease                                                                                                                                                                                                                                                                                                                                                                                                                                                                                                                                                          |
| <b>INTERVENTION:</b>                                                                                       | Bleeding Assessment Tool                                                                                                                                                                                                                                                                                                                                                                                                                                                                                                                                                                              |
| <b>PURPOSE OF THE TEST:</b>                                                                                | Identify patients with VWD                                                                                                                                                                                                                                                                                                                                                                                                                                                                                                                                                                            |
| <b>ROLE OF THE TEST:</b>                                                                                   | Identify patients with VWD                                                                                                                                                                                                                                                                                                                                                                                                                                                                                                                                                                            |
| <b>LINKED TREATMENTS:</b>                                                                                  | Desmopressin, Tranexamic acid, Factor replacement                                                                                                                                                                                                                                                                                                                                                                                                                                                                                                                                                     |
| <b>ANTICIPATED OUTCOMES:</b>                                                                               | BATs – False positive, BATs – False negative, BATs – True positive, BATs – True negative Major bleeding, transfusion and treatment, blood loss, gastrointestinal bleeding, symptom severity, minor bleeding, mortality.                                                                                                                                                                                                                                                                                                                                                                               |
| <b>SETTING:</b>                                                                                            | Outpatient                                                                                                                                                                                                                                                                                                                                                                                                                                                                                                                                                                                            |
| <b>PERSPECTIVE:</b>                                                                                        | Clinical recommendation – population perspective                                                                                                                                                                                                                                                                                                                                                                                                                                                                                                                                                      |
| <b>BACKGROUND:</b>                                                                                         | Von Willebrand disease (VWD) is the most common inherited bleeding disorder known in humans: while estimated to affect between 0.1 and 1% of the general population, many are never diagnosed. Assessment of the severity of bleeding symptoms is challenging because of the difficulties in reporting subjective bleeding symptoms in a consistent way. The importance of the problem arises from the necessity of assessing the bleeding history to limit the need for unnecessary laboratory testing and also to avoid false-positive cases that are possible when diagnosing VWD. (Pathare, 2018) |
| <b>SUBGROUPS:</b>                                                                                          | This recommendation addresses patients with a VWD pretest probability of 20%, the typical incidence of VWD in patients referred because of a history of abnormal bleeding symptoms, with or without abnormal laboratory blood tests (including the pediatric population).                                                                                                                                                                                                                                                                                                                             |
| <b>CONFLICT OF INTERESTS:</b>                                                                              | ASH conflict of interest declaration and management policies were applied, and the following panel members were voting panel members (determining the direction and strength of the recommendation): Sandra Haberichter, Jeroen Eikenboom, Barbara Konkle, Robert Sidonio Jr, Simon McRae, Robert Montgomery, James O'Donnell, Claire McLintock, Barbara Ameer, Nicolas Giraud, Nikole Scappe, Vicki Jacobs-Pratt, Paula James, Nathan Connell.<br><br>No panel members recused as a result of risk of conflicts of interest.                                                                         |



**ASSESSMENT**

| <b>Problem</b><br>Is the problem a priority?                                                                                                                                |                                                                                                                                                                                                                                                                                                                                                              |                                                                                                          |
|-----------------------------------------------------------------------------------------------------------------------------------------------------------------------------|--------------------------------------------------------------------------------------------------------------------------------------------------------------------------------------------------------------------------------------------------------------------------------------------------------------------------------------------------------------|----------------------------------------------------------------------------------------------------------|
| JUDGEMENT                                                                                                                                                                   | RESEARCH EVIDENCE                                                                                                                                                                                                                                                                                                                                            | ADDITIONAL CONSIDERATIONS                                                                                |
| <input type="radio"/> No<br><input type="radio"/> Probably no<br><input type="radio"/> Probably yes<br><input checked="" type="radio"/> Yes<br><input type="radio"/> Varies | Von Willebrand disease (VWD) is the most common inherited bleeding disorder known in humans: while estimated to affect between 0.1 and 1% of the general population, many are never diagnosed. Assessment of the severity of bleeding symptoms is challenging because of the difficulties in reporting subjective bleeding symptoms in a consistent way. The | This question was judged to be a priority among many candidate questions to address in these guidelines. |



|                                  |                                                                                                                                                                                                                                          |  |
|----------------------------------|------------------------------------------------------------------------------------------------------------------------------------------------------------------------------------------------------------------------------------------|--|
| <input type="radio"/> Don't know | importance of the problem arises from the necessity of assessing the bleeding history to limit the need for unnecessary laboratory testing and also to avoid false-positive cases that are possible when diagnosing VWD. (Pathare, 2018) |  |
|----------------------------------|------------------------------------------------------------------------------------------------------------------------------------------------------------------------------------------------------------------------------------------|--|

**Test accuracy**  
How accurate is the test?

| JUDGEMENT                                                                                                                                                                                                                         | RESEARCH EVIDENCE                                                                                                                                                                                                                                                                                                                                                                                                                                                                                                                                                                                                                                                                                                                                                                                                                                                                                                                                                                                                                                                                                                                                                                            | ADDITIONAL CONSIDERATIONS     |                                                               |                   |                                                               |                |                                              |              |                  |                 |               |                |                                              |                               |                  |                 |                  |                                                                                                                                                                                                                                                                                                                                                                                                                                            |
|-----------------------------------------------------------------------------------------------------------------------------------------------------------------------------------------------------------------------------------|----------------------------------------------------------------------------------------------------------------------------------------------------------------------------------------------------------------------------------------------------------------------------------------------------------------------------------------------------------------------------------------------------------------------------------------------------------------------------------------------------------------------------------------------------------------------------------------------------------------------------------------------------------------------------------------------------------------------------------------------------------------------------------------------------------------------------------------------------------------------------------------------------------------------------------------------------------------------------------------------------------------------------------------------------------------------------------------------------------------------------------------------------------------------------------------------|-------------------------------|---------------------------------------------------------------|-------------------|---------------------------------------------------------------|----------------|----------------------------------------------|--------------|------------------|-----------------|---------------|----------------|----------------------------------------------|-------------------------------|------------------|-----------------|------------------|--------------------------------------------------------------------------------------------------------------------------------------------------------------------------------------------------------------------------------------------------------------------------------------------------------------------------------------------------------------------------------------------------------------------------------------------|
| <input type="radio"/> Very inaccurate<br><input checked="" type="radio"/> Inaccurate<br><input type="radio"/> Accurate<br><input type="radio"/> Very accurate<br><input type="radio"/> Varies<br><input type="radio"/> Don't know | <p>Pooled sensitivity across 7 cohort studies with 112 patients was 0.75 (95% CI: 0.66 to 0.83)<br/>         Pooled specificity across 7 cohort studies with 863 patients was 0.54 (95% CI: 0.29 to 0.77)</p> <table border="1" data-bbox="531 565 1308 1114"> <thead> <tr> <th>Outcome</th> <th>Study design</th> <th>Test accuracy CoE</th> <th>Effect per 1000 patients/year for pre-test probability of 20%</th> </tr> </thead> <tbody> <tr> <td>True positives</td> <td rowspan="2">cross-sectional (cohort type accuracy study)</td> <td rowspan="2">⊕⊕⊕⊕<br/>HIGH</td> <td>150 (132 to 165)</td> </tr> <tr> <td>False negatives</td> <td>50 (35 to 68)</td> </tr> <tr> <td>True negatives</td> <td rowspan="2">cross-sectional (cohort type accuracy study)</td> <td rowspan="2">⊕⊕⊕○<br/>MODERATE<sup>a</sup></td> <td>431 (234 to 614)</td> </tr> <tr> <td>False positives</td> <td>369 (186 to 566)</td> </tr> </tbody> </table> <p>a. The heterogeneity measurement I<sup>2</sup> is 98%, and the point estimates of specificity are not homogenous which cannot be explained by the setting or risk of bias a priori</p> <p>Refer to the Appendix at the end of the document</p> | Outcome                       | Study design                                                  | Test accuracy CoE | Effect per 1000 patients/year for pre-test probability of 20% | True positives | cross-sectional (cohort type accuracy study) | ⊕⊕⊕⊕<br>HIGH | 150 (132 to 165) | False negatives | 50 (35 to 68) | True negatives | cross-sectional (cohort type accuracy study) | ⊕⊕⊕○<br>MODERATE <sup>a</sup> | 431 (234 to 614) | False positives | 369 (186 to 566) | <p>The studies assess Bleeding Assessment Tools (BATs) versus non-BATs and do not compare BATs with non-standardized testing. The panel judged the test accuracy to be inaccurate for patients with a pretest probability of 20%, the typical incidence of VWD in patients referred because of a personal history of abnormal bleeding symptoms, with or without abnormal laboratory blood tests (including the pediatric population).</p> |
| Outcome                                                                                                                                                                                                                           | Study design                                                                                                                                                                                                                                                                                                                                                                                                                                                                                                                                                                                                                                                                                                                                                                                                                                                                                                                                                                                                                                                                                                                                                                                 | Test accuracy CoE             | Effect per 1000 patients/year for pre-test probability of 20% |                   |                                                               |                |                                              |              |                  |                 |               |                |                                              |                               |                  |                 |                  |                                                                                                                                                                                                                                                                                                                                                                                                                                            |
| True positives                                                                                                                                                                                                                    | cross-sectional (cohort type accuracy study)                                                                                                                                                                                                                                                                                                                                                                                                                                                                                                                                                                                                                                                                                                                                                                                                                                                                                                                                                                                                                                                                                                                                                 | ⊕⊕⊕⊕<br>HIGH                  | 150 (132 to 165)                                              |                   |                                                               |                |                                              |              |                  |                 |               |                |                                              |                               |                  |                 |                  |                                                                                                                                                                                                                                                                                                                                                                                                                                            |
| False negatives                                                                                                                                                                                                                   |                                                                                                                                                                                                                                                                                                                                                                                                                                                                                                                                                                                                                                                                                                                                                                                                                                                                                                                                                                                                                                                                                                                                                                                              |                               | 50 (35 to 68)                                                 |                   |                                                               |                |                                              |              |                  |                 |               |                |                                              |                               |                  |                 |                  |                                                                                                                                                                                                                                                                                                                                                                                                                                            |
| True negatives                                                                                                                                                                                                                    | cross-sectional (cohort type accuracy study)                                                                                                                                                                                                                                                                                                                                                                                                                                                                                                                                                                                                                                                                                                                                                                                                                                                                                                                                                                                                                                                                                                                                                 | ⊕⊕⊕○<br>MODERATE <sup>a</sup> | 431 (234 to 614)                                              |                   |                                                               |                |                                              |              |                  |                 |               |                |                                              |                               |                  |                 |                  |                                                                                                                                                                                                                                                                                                                                                                                                                                            |
| False positives                                                                                                                                                                                                                   |                                                                                                                                                                                                                                                                                                                                                                                                                                                                                                                                                                                                                                                                                                                                                                                                                                                                                                                                                                                                                                                                                                                                                                                              |                               | 369 (186 to 566)                                              |                   |                                                               |                |                                              |              |                  |                 |               |                |                                              |                               |                  |                 |                  |                                                                                                                                                                                                                                                                                                                                                                                                                                            |

**Desirable Effects**  
How substantial are the desirable anticipated effects?

| JUDGEMENT                                                                                                                                                 | RESEARCH EVIDENCE                                                                                                                                                                                                                                                                                                                                                                                                                                                                                                                                                                                                                                                                                                                                                                                                                                                                                                                                                                                                                                                                                                                                                              | ADDITIONAL CONSIDERATIONS                                                                                                                                                                                                                                                                                                                                                                                                                                                                                                                                                    |
|-----------------------------------------------------------------------------------------------------------------------------------------------------------|--------------------------------------------------------------------------------------------------------------------------------------------------------------------------------------------------------------------------------------------------------------------------------------------------------------------------------------------------------------------------------------------------------------------------------------------------------------------------------------------------------------------------------------------------------------------------------------------------------------------------------------------------------------------------------------------------------------------------------------------------------------------------------------------------------------------------------------------------------------------------------------------------------------------------------------------------------------------------------------------------------------------------------------------------------------------------------------------------------------------------------------------------------------------------------|------------------------------------------------------------------------------------------------------------------------------------------------------------------------------------------------------------------------------------------------------------------------------------------------------------------------------------------------------------------------------------------------------------------------------------------------------------------------------------------------------------------------------------------------------------------------------|
| <ul style="list-style-type: none"> <li>○ Trivial</li> <li>● Small</li> <li>○ Moderate</li> <li>○ Large</li> <li>○ Varies</li> <li>○ Don't know</li> </ul> | <p><b>True Positive:</b> These are patients who have VWD and who received preventive and appropriate treatment. They benefit from decreasing the risk of bleeding with treatment and they suffer the side effects of treatment.</p> <p><b>True Negative:</b> These are patients who did not have VWD and who were correctly identified as not having the disease. They will appropriately not receive treatment for VWD and not suffer the side effects of treatment.</p> <p><b>False Negative:</b> These are patients who have VWD but the diagnosis was missed and will be sent home without appropriate treatment. They face the risks of prolonged and heavy bleeding due to not receiving treatment.</p> <p><b>False Positive:</b> These are individuals who do not have VWD but they will be labeled as potentially having a bleeding disorder by the BATs. Most of these patients will be reassured of not having VWD when they get additional blood testing. These patients may benefit from the treatment if they have other bleeding disorders, but they will also suffer the side effects of treatment.</p> <p>Refer to the Appendix at the end of the document</p> | <p>The benefit of a BAT is to identify patients who have VWD, who will be missed without this tool in the clinic. Using a BAT will allow for the quantification of bleeding symptoms in patients.</p> <p>The panel considered not missing a patient with VWD as the most important desirable effect, in addition to identify patients in a timely manner, in the appropriate center and to decrease unnecessary blood testing.</p> <p>BATs are educationally beneficial for patients and clinical experts and provides validation for patients about having the disease.</p> |

**Undesirable Effects**  
How substantial are the undesirable anticipated effects?

| JUDGEMENT                                                                                                                                                 | RESEARCH EVIDENCE                                                                                                                                                                                                                                                                                                                                                                                                                                                                                                                                                                                                                                                                                                                                                                                                                                                                                                                                                                                                         | ADDITIONAL CONSIDERATIONS |
|-----------------------------------------------------------------------------------------------------------------------------------------------------------|---------------------------------------------------------------------------------------------------------------------------------------------------------------------------------------------------------------------------------------------------------------------------------------------------------------------------------------------------------------------------------------------------------------------------------------------------------------------------------------------------------------------------------------------------------------------------------------------------------------------------------------------------------------------------------------------------------------------------------------------------------------------------------------------------------------------------------------------------------------------------------------------------------------------------------------------------------------------------------------------------------------------------|---------------------------|
| <ul style="list-style-type: none"> <li>○ Large</li> <li>● Moderate</li> <li>○ Small</li> <li>○ Trivial</li> <li>○ Varies</li> <li>○ Don't know</li> </ul> | <p><b>True Positive:</b> These are patients who have VWD and who received preventive and appropriate treatment. They benefit from decreasing the risk of bleeding with treatment and they suffer the side effects of treatment.</p> <p><b>True Negative:</b> These are patients who did not have VWD and who were correctly identified as not having the disease. They will appropriately not receive treatment for VWD and not suffer the side effects of treatment.</p> <p><b>False Negative:</b> These are patients who have VWD but the diagnosis was missed and will be sent home without appropriate treatment. They face the risks of prolonged and heavy bleeding due to not receiving treatment.</p> <p><b>False Positive:</b> These are individuals who do not have VWD but they will be labeled as potentially having a bleeding disorder by the BATs. Most of these patients will be reassured of not having VWD when they get additional blood testing. These patients may benefit from the treatment if</p> |                           |

|  |                                                                                                                                                             |  |
|--|-------------------------------------------------------------------------------------------------------------------------------------------------------------|--|
|  | <p>they have other bleeding disorders, but they will also suffer the side effects of treatment.</p> <p>Refer to the Appendix at the end of the document</p> |  |
|--|-------------------------------------------------------------------------------------------------------------------------------------------------------------|--|

**Certainty of the evidence of test accuracy**  
 What is the overall certainty of the evidence of test accuracy?

| <b>JUDGEMENT</b>                                                                                                                                                                                                                                              | <b>RESEARCH EVIDENCE</b>                                                                                                                                                                                                                                                                                                                                                                                                                                                           | <b>ADDITIONAL CONSIDERATIONS</b>                                                                                                                                                                                                                                                                                                         |
|---------------------------------------------------------------------------------------------------------------------------------------------------------------------------------------------------------------------------------------------------------------|------------------------------------------------------------------------------------------------------------------------------------------------------------------------------------------------------------------------------------------------------------------------------------------------------------------------------------------------------------------------------------------------------------------------------------------------------------------------------------|------------------------------------------------------------------------------------------------------------------------------------------------------------------------------------------------------------------------------------------------------------------------------------------------------------------------------------------|
| <ul style="list-style-type: none"> <li><input type="radio"/> Very low</li> <li><input type="radio"/> Low</li> <li><input checked="" type="radio"/> Moderate</li> <li><input type="radio"/> High</li> <li><input type="radio"/> No included studies</li> </ul> | <p>The risk of bias assessed using the QUADAS tool is not serious. Additionally, the articles addressed the PICO question directly and the results were precise. However, the point estimates of specificity are not homogenous which was not explained by the setting or risk of bias a priori. This gives an overall high certainty of evidence for sensitivity and moderate certainty of evidence for specificity.</p> <p>Refer to the Appendix at the end of the document.</p> | <p>The data presented in the studies consider mostly women. It is important also to consider BATs in the pediatric population, as children might have a negative bleeding score due to lack of adequate bleeding challenges. The bleeding score may become positive with age. Men are more likely to have a negative bleeding score.</p> |

**Certainty of the evidence of test's effects**  
 What is the overall certainty of the evidence for any critical or important direct benefits, adverse effects or burden of the test?

| <b>JUDGEMENT</b>                                                                                                                                                                                                                                              | <b>RESEARCH EVIDENCE</b>                                                                                      | <b>ADDITIONAL CONSIDERATIONS</b> |
|---------------------------------------------------------------------------------------------------------------------------------------------------------------------------------------------------------------------------------------------------------------|---------------------------------------------------------------------------------------------------------------|----------------------------------|
| <ul style="list-style-type: none"> <li><input type="radio"/> Very low</li> <li><input type="radio"/> Low</li> <li><input type="radio"/> Moderate</li> <li><input type="radio"/> High</li> <li><input checked="" type="radio"/> No included studies</li> </ul> | <p>There are no relevant test effects since the intervention is a questionnaire and not an invasive test.</p> |                                  |

**Certainty of the evidence of management's effects**  
 What is the overall certainty of the evidence of effects of the management that is guided by the test results?

| <b>JUDGEMENT</b> | <b>RESEARCH EVIDENCE</b> | <b>ADDITIONAL CONSIDERATIONS</b> |
|------------------|--------------------------|----------------------------------|
|                  |                          |                                  |

|                                                                                                                                                |  |                                                                                                                                                                                                                                                                                                                                                                                                                                        |
|------------------------------------------------------------------------------------------------------------------------------------------------|--|----------------------------------------------------------------------------------------------------------------------------------------------------------------------------------------------------------------------------------------------------------------------------------------------------------------------------------------------------------------------------------------------------------------------------------------|
| <ul style="list-style-type: none"> <li>○ Very low</li> <li>○ Low</li> <li>○ Moderate</li> <li>○ High</li> <li>● No included studies</li> </ul> |  | <p>Despite the lack of included studies, there is <b>variability and inconsistency</b> in what happens to patients during their diagnostic journey. Early detection of mild disease may help in management, especially in women who face additional bleeding challenges during reproductive years.</p> <p>Patients in the primary care setting (pre-test probability 3%) who are not recognized as having VWD will not be treated.</p> |
|------------------------------------------------------------------------------------------------------------------------------------------------|--|----------------------------------------------------------------------------------------------------------------------------------------------------------------------------------------------------------------------------------------------------------------------------------------------------------------------------------------------------------------------------------------------------------------------------------------|

**Certainty of the evidence of test result/management**  
How certain is the link between test results and management decisions?

| JUDGEMENT                                                                                                                                      | RESEARCH EVIDENCE | ADDITIONAL CONSIDERATIONS                                                                                                                                                                                                                                                                                                                                                                                                               |
|------------------------------------------------------------------------------------------------------------------------------------------------|-------------------|-----------------------------------------------------------------------------------------------------------------------------------------------------------------------------------------------------------------------------------------------------------------------------------------------------------------------------------------------------------------------------------------------------------------------------------------|
| <ul style="list-style-type: none"> <li>○ Very low</li> <li>○ Low</li> <li>○ Moderate</li> <li>○ High</li> <li>● No included studies</li> </ul> |                   | <p>The diagnosis of VWD is challenging and requires the performance of multiple laboratory tests, that will also determine the type of the disease. There are some limitations in laboratory diagnostic tests as well as overlapping nonspecific mild bleeding symptoms between healthy individuals and VWD patients. Conducting a Bleeding Assessment Tool will guide the healthcare provider to perform laboratory tests for VWD.</p> |

**Certainty of effects**  
What is the overall certainty of the evidence of effects of the test?

| JUDGEMENT                                                                                                                                      | RESEARCH EVIDENCE                                        | ADDITIONAL CONSIDERATIONS |
|------------------------------------------------------------------------------------------------------------------------------------------------|----------------------------------------------------------|---------------------------|
| <ul style="list-style-type: none"> <li>○ Very low</li> <li>● Low</li> <li>○ Moderate</li> <li>○ High</li> <li>○ No included studies</li> </ul> | <p>Refer to the Appendix at the end of the document.</p> |                           |

**Values**  
Is there important uncertainty about or variability in how much people value the main outcomes?

| JUDGEMENT | RESEARCH EVIDENCE | ADDITIONAL CONSIDERATIONS |
|-----------|-------------------|---------------------------|
|           |                   |                           |

|                                                                                                                                                                                                                                                                  |  |                                                                                                                                                                                                                                                                                                                                                                                                                                                                                                                                                                                                                                                                                                                                                                                                                                                                                                                                                                                                                                                                                                                                                                                                                                                                                                                                                                                                                                                                                                                                                                                                               |
|------------------------------------------------------------------------------------------------------------------------------------------------------------------------------------------------------------------------------------------------------------------|--|---------------------------------------------------------------------------------------------------------------------------------------------------------------------------------------------------------------------------------------------------------------------------------------------------------------------------------------------------------------------------------------------------------------------------------------------------------------------------------------------------------------------------------------------------------------------------------------------------------------------------------------------------------------------------------------------------------------------------------------------------------------------------------------------------------------------------------------------------------------------------------------------------------------------------------------------------------------------------------------------------------------------------------------------------------------------------------------------------------------------------------------------------------------------------------------------------------------------------------------------------------------------------------------------------------------------------------------------------------------------------------------------------------------------------------------------------------------------------------------------------------------------------------------------------------------------------------------------------------------|
| <ul style="list-style-type: none"> <li>○ Important uncertainty or variability</li> <li>○ Possibly important uncertainty or variability</li> <li>● Probably no important uncertainty or variability</li> <li>○ No important uncertainty or variability</li> </ul> |  | <p>Patients place high value on being heard, not having their diagnosis missed, and having guidance on appropriate management. Patients value the clarity and precise questions provided by the BATs. They benefit from the standardized and objective way of obtaining bleeding data and would expect the use of non-standardized testing to be poorly received due to the perception of being less reliable. Moreover, patients appreciate their direct input into the collection of personal medical history for making or confirming a diagnosis. Patients think of BATs as similar to surveys given to patients for other diagnoses in internal medicine or family medicine. On the other hand, although BATs are useful adjunct, patients may feel that their story is devalued if reduced entirely to a questionnaire. Since the answers in a structured questionnaire are less subtle than in open questions, patients may prefer an open discussion with the healthcare provider, rather than only a structured questionnaire that may not account for all their bleeding symptoms. Patients might want to know that blood tests are negative even if they have a negative bleeding score, especially if they were told they have VWD, bringing a concern of underdiagnosis or overtreatment; so patients may value a blood test more than BATs for confirmation of diagnosis, regardless of the bleeding score. Finally, privacy and security of sensitive health data are concerns to some patients with online BATs, however there is no universal online BAT that is currently administered.</p> |
|------------------------------------------------------------------------------------------------------------------------------------------------------------------------------------------------------------------------------------------------------------------|--|---------------------------------------------------------------------------------------------------------------------------------------------------------------------------------------------------------------------------------------------------------------------------------------------------------------------------------------------------------------------------------------------------------------------------------------------------------------------------------------------------------------------------------------------------------------------------------------------------------------------------------------------------------------------------------------------------------------------------------------------------------------------------------------------------------------------------------------------------------------------------------------------------------------------------------------------------------------------------------------------------------------------------------------------------------------------------------------------------------------------------------------------------------------------------------------------------------------------------------------------------------------------------------------------------------------------------------------------------------------------------------------------------------------------------------------------------------------------------------------------------------------------------------------------------------------------------------------------------------------|

|                                                                                                             |                                 |                                         |
|-------------------------------------------------------------------------------------------------------------|---------------------------------|-----------------------------------------|
| <p><b>Balance of effects</b></p>                                                                            |                                 |                                         |
| <p>Does the balance between desirable and undesirable effects favor the intervention or the comparison?</p> |                                 |                                         |
| <p><b>JUDGEMENT</b></p>                                                                                     | <p><b>RESEARCH EVIDENCE</b></p> | <p><b>ADDITIONAL CONSIDERATIONS</b></p> |

|                                                                                                                                                                                                                                                                                                                |                                                          |                                                                                                                                                                                  |
|----------------------------------------------------------------------------------------------------------------------------------------------------------------------------------------------------------------------------------------------------------------------------------------------------------------|----------------------------------------------------------|----------------------------------------------------------------------------------------------------------------------------------------------------------------------------------|
| <ul style="list-style-type: none"> <li>○ Favors the comparison</li> <li>● Probably favors the comparison</li> <li>○ Does not favor either the intervention or the comparison</li> <li>○ Probably favors the intervention</li> <li>○ Favors the intervention</li> <li>○ Varies</li> <li>○ Don't know</li> </ul> | <p>Refer to the Appendix at the end of the document.</p> | <p>There is an increasing need to use validated, standardized and sensitive bleeding questionnaires to assist in the determination of both the presence and severity of VWD.</p> |
|----------------------------------------------------------------------------------------------------------------------------------------------------------------------------------------------------------------------------------------------------------------------------------------------------------------|----------------------------------------------------------|----------------------------------------------------------------------------------------------------------------------------------------------------------------------------------|

**Resources required**  
How large are the resource requirements (costs)?

| <b>JUDGEMENT</b>                                                                                                                                                                                                               | <b>RESEARCH EVIDENCE</b> | <b>ADDITIONAL CONSIDERATIONS</b>                                                                                                                                                                                                                                                                                                |
|--------------------------------------------------------------------------------------------------------------------------------------------------------------------------------------------------------------------------------|--------------------------|---------------------------------------------------------------------------------------------------------------------------------------------------------------------------------------------------------------------------------------------------------------------------------------------------------------------------------|
| <ul style="list-style-type: none"> <li>○ Large costs</li> <li>● Moderate costs</li> <li>○ Negligible costs and savings</li> <li>○ Moderate savings</li> <li>○ Large savings</li> <li>○ Varies</li> <li>○ Don't know</li> </ul> |                          | <p>No additional financial resources are required to administer BATs, except time (including training/educating the provider to administer BATs), which is important in the clinical setting. However, not blood testing patients with a 20-50% pretest probability will lead to additional costs if a diagnosis is missed.</p> |

**Certainty of evidence of required resources**  
What is the certainty of the evidence of resource requirements (costs)?

| <b>JUDGEMENT</b>                                                                                                                               | <b>RESEARCH EVIDENCE</b> | <b>ADDITIONAL CONSIDERATIONS</b>                                                                                                                                                                                                                                                                                                |
|------------------------------------------------------------------------------------------------------------------------------------------------|--------------------------|---------------------------------------------------------------------------------------------------------------------------------------------------------------------------------------------------------------------------------------------------------------------------------------------------------------------------------|
| <ul style="list-style-type: none"> <li>○ Very low</li> <li>○ Low</li> <li>○ Moderate</li> <li>○ High</li> <li>● No included studies</li> </ul> |                          | <p>No additional financial resources are required to administer BATs, except time (including training/educating the provider to administer BATs), which is important in the clinical setting. However, not blood testing patients with a 20-50% pretest probability will lead to additional costs if a diagnosis is missed.</p> |

**Cost effectiveness**

Does the cost-effectiveness of the intervention favor the intervention or the comparison?

| JUDGEMENT                                                                                                                                                                                                                                                                                                                                                                                                                                                                      | RESEARCH EVIDENCE                                                                                                                                                                                                                                                                                                                                                                                                                                                                                                                                                               | ADDITIONAL CONSIDERATIONS |
|--------------------------------------------------------------------------------------------------------------------------------------------------------------------------------------------------------------------------------------------------------------------------------------------------------------------------------------------------------------------------------------------------------------------------------------------------------------------------------|---------------------------------------------------------------------------------------------------------------------------------------------------------------------------------------------------------------------------------------------------------------------------------------------------------------------------------------------------------------------------------------------------------------------------------------------------------------------------------------------------------------------------------------------------------------------------------|---------------------------|
| <ul style="list-style-type: none"> <li><input type="radio"/> Favors the comparison</li> <li><input checked="" type="radio"/> Probably favors the comparison</li> <li><input type="radio"/> Does not favor either the intervention or the comparison</li> <li><input type="radio"/> Probably favors the intervention</li> <li><input type="radio"/> Favors the intervention</li> <li><input type="radio"/> Varies</li> <li><input type="radio"/> No included studies</li> </ul> | <p>In a Markov decision analytic model taking a societal perspective and costs expressed in 2007 US dollars, the cost of testing adolescents with menorrhagia for VWD was \$1790, versus \$1251 for not testing for VWD. The effectiveness of not testing in quality-adjusted life-years (QALYs) gained (14.237 QALYs) was similar to the VWD testing strategy (14.246 QALYs). Compared with not testing for VWD, screening for VWD had an incremental cost-effectiveness ratio of \$62 791 per QALY, a value typically considered economically reasonable (Sidonio, 2010).</p> |                           |

**Equity**

What would be the impact on health equity?

| JUDGEMENT                                                                                                                                                                                                                                                                                                                                                               | RESEARCH EVIDENCE | ADDITIONAL CONSIDERATIONS                                                                                                                                                                                                                                                                        |
|-------------------------------------------------------------------------------------------------------------------------------------------------------------------------------------------------------------------------------------------------------------------------------------------------------------------------------------------------------------------------|-------------------|--------------------------------------------------------------------------------------------------------------------------------------------------------------------------------------------------------------------------------------------------------------------------------------------------|
| <ul style="list-style-type: none"> <li><input type="radio"/> Reduced</li> <li><input type="radio"/> Probably reduced</li> <li><input type="radio"/> Probably no impact</li> <li><input checked="" type="radio"/> Probably increased</li> <li><input type="radio"/> Increased</li> <li><input type="radio"/> Varies</li> <li><input type="radio"/> Don't know</li> </ul> |                   | <p>BATs are generally available for all patients, which might help patients receive equitable care.</p> <p>More work has been done with BATs in English language than other languages, although the ISTH-BAT has been translated and is available in German, Italian, Norwegian and Spanish.</p> |

**Acceptability**

Is the intervention acceptable to key stakeholders?

| JUDGEMENT                                                                                                                                                                                                                                                                                       | RESEARCH EVIDENCE | ADDITIONAL CONSIDERATIONS                                                             |
|-------------------------------------------------------------------------------------------------------------------------------------------------------------------------------------------------------------------------------------------------------------------------------------------------|-------------------|---------------------------------------------------------------------------------------|
| <ul style="list-style-type: none"> <li><input type="radio"/> No</li> <li><input type="radio"/> Probably no</li> <li><input type="radio"/> Probably yes</li> <li><input checked="" type="radio"/> Yes</li> <li><input type="radio"/> Varies</li> <li><input type="radio"/> Don't know</li> </ul> |                   | <p>BATs are generally accepted by all patients referred to the hematology clinic.</p> |

**Feasibility**

Is the intervention feasible to implement?

| JUDGEMENT                                                                                                                                                           | RESEARCH EVIDENCE | ADDITIONAL CONSIDERATIONS                                                                                                                                                                                                                                                                                                                                                                                                                                                                                                                                                                                                                                                                                                                                                                                                                                                                                                                                                                                                                                                                                                                                                                                                                                                                                                                                                                                                                                                                                                                                              |
|---------------------------------------------------------------------------------------------------------------------------------------------------------------------|-------------------|------------------------------------------------------------------------------------------------------------------------------------------------------------------------------------------------------------------------------------------------------------------------------------------------------------------------------------------------------------------------------------------------------------------------------------------------------------------------------------------------------------------------------------------------------------------------------------------------------------------------------------------------------------------------------------------------------------------------------------------------------------------------------------------------------------------------------------------------------------------------------------------------------------------------------------------------------------------------------------------------------------------------------------------------------------------------------------------------------------------------------------------------------------------------------------------------------------------------------------------------------------------------------------------------------------------------------------------------------------------------------------------------------------------------------------------------------------------------------------------------------------------------------------------------------------------------|
| <ul style="list-style-type: none"> <li>○ No</li> <li>○ Probably no</li> <li>○ Probably yes</li> <li>○ Yes</li> <li>● <b>Varies</b></li> <li>○ Don't know</li> </ul> |                   | <p>BATs might be less feasible in the primary care setting because of the need for additional resources (ie: time) when administering the questionnaire although this varies depending on the setting.</p> <p>With minimal training, the BATs may be administered by any healthcare professional (usually nursing staff or clinicians); self-administered versions are also available for patients to complete unassisted. The healthcare professional should be very familiar with bleeding disorders to tease out information from the patient who may not realize that they have more symptoms than they appreciate. If administered by clinicians, the tool needs to have minimal risk of interpretation errors such as subjective judgment differences between clinicians. The Self-BAT minimizes the errors using lay terms without complex definitions and criteria. The data are collected through paper or electronic record after face to face or phone interview. Currently, paper-based is the most used way of collecting the data, computer-assisted BATs to rapidly pass through negative domains would be useful while taking into consideration the resource implications. It usually takes 10-20 minutes to complete the BATs, but may take up to 30 minutes depending on the version. Time use may have a feasibility implication, but the panel felt BATs are often quicker than unstructured history for bleeding symptoms. BATs become time-consuming specifically when administered by the nursing staff seeing a large volume of patients.</p> |



|  |  |                                                                                                                                                                                                                                                                                                                                                                                                                                                                                                                                                                                                                                                                         |
|--|--|-------------------------------------------------------------------------------------------------------------------------------------------------------------------------------------------------------------------------------------------------------------------------------------------------------------------------------------------------------------------------------------------------------------------------------------------------------------------------------------------------------------------------------------------------------------------------------------------------------------------------------------------------------------------------|
|  |  | <p>The question tackles using the BATs in secondary care. The primary screening would have been already performed by the primary care provider. This means that the incidence of bleeding problems is increased and the ability of the BATs alone to exclude a bleeding problem is limited (like d-dimer for thrombosis). The current BATs (e.g. ISTH, Self-BAT, PBQ, etc.) were not developed to serve primarily as a diagnostic tool, but to stratify patients in large cohort studies. Although a normal bleeding score and negative screening tests mean that no additional testing is needed, a normal bleeding score is not enough to rule out the diagnosis.</p> |
|--|--|-------------------------------------------------------------------------------------------------------------------------------------------------------------------------------------------------------------------------------------------------------------------------------------------------------------------------------------------------------------------------------------------------------------------------------------------------------------------------------------------------------------------------------------------------------------------------------------------------------------------------------------------------------------------------|

#### SUMMARY OF JUDGEMENTS

|                                                   | JUDGEMENT       |                   |                 |               |  |        |                            |
|---------------------------------------------------|-----------------|-------------------|-----------------|---------------|--|--------|----------------------------|
| PROBLEM                                           | No              | Probably no       | Probably yes    | Yes           |  | Varies | Don't know                 |
| TEST ACCURACY                                     | Very inaccurate | <b>Inaccurate</b> | Accurate        | Very accurate |  | Varies | Don't know                 |
| DESIRABLE EFFECTS                                 | Trivial         | <b>Small</b>      | Moderate        | Large         |  | Varies | Don't know                 |
| UNDESIRABLE EFFECTS                               | Large           | <b>Moderate</b>   | Small           | Trivial       |  | Varies | Don't know                 |
| CERTAINTY OF THE EVIDENCE OF TEST ACCURACY        | Very low        | Low               | <b>Moderate</b> | High          |  |        | No included studies        |
| CERTAINTY OF THE EVIDENCE OF TEST'S EFFECTS       | Very low        | Low               | Moderate        | High          |  |        | <b>No included studies</b> |
| CERTAINTY OF THE EVIDENCE OF MANAGEMENT'S EFFECTS | Very low        | Low               | Moderate        | High          |  |        | <b>No included studies</b> |

|                                                     | JUDGEMENT                            |                                               |                                                          |                                         |                         |               |                     |
|-----------------------------------------------------|--------------------------------------|-----------------------------------------------|----------------------------------------------------------|-----------------------------------------|-------------------------|---------------|---------------------|
| CERTAINTY OF THE EVIDENCE OF TEST RESULT/MANAGEMENT | Very low                             | Low                                           | Moderate                                                 | High                                    |                         |               | No included studies |
| CERTAINTY OF EFFECTS                                | Very low                             | <b>Low</b>                                    | Moderate                                                 | High                                    |                         |               | No included studies |
| VALUES                                              | Important uncertainty or variability | Possibly important uncertainty or variability | <b>Probably no important uncertainty or variability</b>  | No important uncertainty or variability |                         |               |                     |
| BALANCE OF EFFECTS                                  | Favors the comparison                | <b>Probably favors the comparison</b>         | Does not favor either the intervention or the comparison | Probably favors the intervention        | Favors the intervention | Varies        | Don't know          |
| RESOURCES REQUIRED                                  | Large costs                          | <b>Moderate costs</b>                         | Negligible costs and savings                             | Moderate savings                        | Large savings           | Varies        | Don't know          |
| CERTAINTY OF EVIDENCE OF REQUIRED RESOURCES         | Very low                             | Low                                           | Moderate                                                 | High                                    |                         |               | No included studies |
| COST EFFECTIVENESS                                  | Favors the comparison                | <b>Probably favors the comparison</b>         | Does not favor either the intervention or the comparison | Probably favors the intervention        | Favors the intervention | Varies        | No included studies |
| EQUITY                                              | Reduced                              | Probably reduced                              | Probably no impact                                       | <b>Probably increased</b>               | Increased               | Varies        | Don't know          |
| ACCEPTABILITY                                       | No                                   | Probably no                                   | Probably yes                                             | <b>Yes</b>                              |                         | Varies        | Don't know          |
| FEASIBILITY                                         | No                                   | Probably no                                   | Probably yes                                             | Yes                                     |                         | <b>Varies</b> | Don't know          |

#### TYPE OF RECOMMENDATION

|                                                |                                                            |                                                                          |                                                 |                                            |
|------------------------------------------------|------------------------------------------------------------|--------------------------------------------------------------------------|-------------------------------------------------|--------------------------------------------|
| Strong recommendation against the intervention | <b>Conditional recommendation against the intervention</b> | Conditional recommendation for either the intervention or the comparison | Conditional recommendation for the intervention | Strong recommendation for the intervention |
|------------------------------------------------|------------------------------------------------------------|--------------------------------------------------------------------------|-------------------------------------------------|--------------------------------------------|

## CONCLUSIONS

### Recommendation

In patients with an intermediate probability of VWD (e.g. referred to a hematologist), the panel suggests against using a bleeding assessment tool (BAT) as an initial screening test to decide if specific blood testing is warranted, and rather performing specific blood testing in conjunction with the administration of a BAT for the diagnosis of VWD.

(Conditional recommendation based on moderate certainty in the evidence)

#### Remarks:

- This recommendation addresses patients with an intermediate VWD pretest probability (~20%) corresponding to those typically referred for hematology evaluation because of an abnormal personal bleeding history or abnormal initial laboratory tests (e.g. prolonged aPTT) (including the pediatric population).
- Beyond their utility as a screening test in the primary care setting, BATs can be used in the referral setting to assess and document the severity of bleeding.
- Specific blood testing for VWD refers to VWF:Ag, VWF activity and FVIII:C.

### Justification

The guideline panel determined that there is moderate certainty in the evidence for a net health benefit from using BATs and blood testing over BATs in patients suspected of VWD with a history of abnormal bleeding. Other EtD criteria were generally in favor of using blood testing so that the desirable consequences were greater than the undesirable consequences. This recommendation would also benefit patients with bleeding disorders other than VWD.

### Subgroup considerations

### Implementation considerations

### Monitoring and evaluation

## Research priorities

- Studies regarding pediatric use of BATs.
- Studies regarding BATs use in adolescent males and females.

### APPENDIX

#### 1. Risk of Bias:

| Author           | Year | Patient Selection Risk of bias | Index test Risk of bias | Reference test Risk of bias | Flow and timing Risk of bias |
|------------------|------|--------------------------------|-------------------------|-----------------------------|------------------------------|
| Bowman, M.       | 2008 | Low                            | Low                     | Low                         | Low                          |
| Bowman, M.       | 2009 | Low                            | Low                     | Low                         | Low                          |
| Deforest, M.     | 2015 | Low                            | Low                     | Low                         | Low                          |
| Malec, L. M.     | 2016 | Low                            | Low                     | Low                         | Low                          |
| Marcus, P. D     | 2011 | Low                            | Low                     | Low                         | Low                          |
| Bidlingmaier, C. | 2012 | Low                            | Low                     | Low                         | Low                          |
| Philipp, C. S.   | 2008 | Moderate                       | Moderate                | Low                         | Low                          |
| Faiz, A.         | 2017 | High                           | Low                     | Moderate                    | Low                          |
| Belen, B.        | 2015 | High                           | Low                     | Low                         | Low                          |
| Mittal, N.       | 2015 | High                           | Moderate                | High                        | Low                          |
| Pathare, A.      | 2018 | High                           | Moderate                | Low                         | Low                          |
| Bujnicki, H. C.  | 2011 | High                           | Moderate                | High                        | Low                          |
| Rodeghiero, F.   | 2005 | High                           | Moderate                | Moderate                    | Low                          |

## 2. Test Accuracy Results

| ID  | Author           | Year | Study Design            | Number of patients | TP | FN | FP  | TN   | Sens  | Low CI | Up CI | Spec  | Low CI | Up CI | Prevalence |
|-----|------------------|------|-------------------------|--------------------|----|----|-----|------|-------|--------|-------|-------|--------|-------|------------|
| 629 | Bidlingmaier, C. | 2012 | Cohort with DTA results | 100                | 18 | 5  | 11  | 66   | 0.783 | 0.572  | 0.907 | 0.857 | 0.76   | 0.919 | 23%        |
| 795 | Bowman, M.       | 2008 | Cohort with DTA results | 217                | 7  | 0  | 28  | 182  | 0.937 | 0.461  | 0.996 | 0.865 | 0.812  | 0.905 | 3%         |
| 620 | Bowman, M.       | 2009 | Cohort with DTA results | 151                | 5  | 1  | 31  | 114  | 0.833 | 0.369  | 0.977 | 0.786 | 0.712  | 0.845 | 3%         |
| 488 | Deforest, M.     | 2015 | Cohort with DTA results | 64                 | 7  | 2  | 40  | 15   | 0.778 | 0.421  | 0.944 | 0.273 | 0.172  | 0.404 | 14%        |
| 446 | Malec, L. M.     | 2016 | Cohort with DTA results | 193                | 32 | 15 | 96  | 50   | 0.681 | 0.536  | 0.798 | 0.342 | 0.27   | 0.423 | 22%        |
| 681 | Marcus, P. D     | 2011 | Cohort with DTA results | 104                | 7  | 1  | 67  | 29   | 0.875 | 0.463  | 0.983 | 0.302 | 0.219  | 0.401 | 8%         |
| 135 | Philipp, C. S.   | 2008 | Cohort with DTA results | 146                | 10 | 2  | 107 | 27   | 0.833 | 0.523  | 0.958 | 0.201 | 0.142  | 0.278 | 8%         |
| 146 | Faiz, A.         | 2017 | Case Control            | 53                 | 21 | 5  | 19  | 8    | 0.808 | 0.613  | 0.918 | 0.296 | 0.156  | 0.49  | 27%        |
| 407 | Belen, B.        | 2015 | Case Control            | 84                 | 46 | 0  | 15  | 17   | 0.989 | 0.851  | 0.999 | 0.53  | 0.363  | 0.691 | 25%        |
| 710 | Mittal, N.       | 2015 | Case Control            | 1316               | 34 | 1  | 36  | 1245 | 0.971 | 0.823  | 0.996 | 0.972 | 0.961  | 0.98  | 3%         |
| 673 | Pathare, A.      | 2018 | Case Control            | 96                 | 33 | 13 | 8   | 42   | 0.717 | 0.572  | 0.828 | 0.84  | 0.711  | 0.918 | 48%        |
| 585 | Bujnicki, H. C.  | 2011 | Case control            | 160                | 75 | 5  | 4   | 76   | 0.937 | 0.858  | 0.974 | 0.95  | 0.874  | 0.981 | 50%        |
| 260 | Rodeghiero, F.   | 2005 | Case Control            | 341                | 81 | 2  | 45  | 213  | 0.976 | 0.909  | 0.994 | 0.826 | 0.774  | 0.867 | 25%        |

| Studies                                     | Estimate (95% C.I.)         | TP/(TP + FN)  |
|---------------------------------------------|-----------------------------|---------------|
| Bowman, M. (C, MCMDM-1) 2008                | 0.938 (0.461, 0.996)        | 7/7           |
| Bowman, M., (C, PBQ) 2009                   | 0.833 (0.369, 0.977)        | 5/6           |
| Deforest, M., A., (C, Self BAT) 2015        | 0.778 (0.421, 0.944)        | 7/9           |
| Malec, L. M., (C, Composite score) 2016     | 0.681 (0.536, 0.798)        | 32/47         |
| Marcus, P. D., (C, Modified Vicenza) 2011   | 0.875 (0.463, 0.983)        | 7/8           |
| Philipp, C. S. (C, Questionnaire) 2008      | 0.833 (0.523, 0.958)        | 10/12         |
| Bidlingmaier, C. (C, ISTH Child BS) 2012    | 0.783 (0.572, 0.907)        | 18/23         |
| <b>Overall (I<sup>2</sup>=0 %, P=0.698)</b> | <b>0.752 (0.661, 0.826)</b> | <b>86/112</b> |

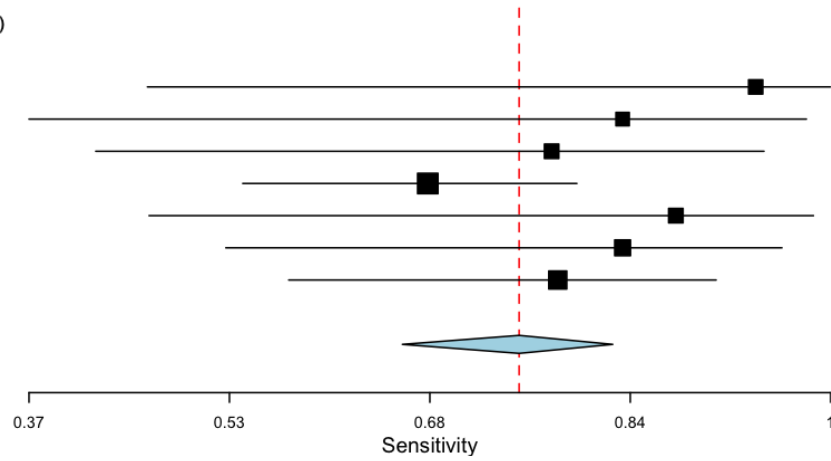

| Studies                                            | Estimate (95% C.I.)         | TN/(FP + TN)   |
|----------------------------------------------------|-----------------------------|----------------|
| Bowman, M. (C, MCMDM-1) 2008                       | 0.865 (0.812, 0.905)        | 182/210        |
| Bowman, M., (C, PBQ) 2009                          | 0.786 (0.712, 0.845)        | 114/145        |
| Deforest, M., A., (C, Self BAT) 2015               | 0.273 (0.172, 0.404)        | 15/55          |
| Malec, L. M., (C, Composite score) 2016            | 0.342 (0.270, 0.423)        | 50/146         |
| Marcus, P. D., (C, Modified Vicenza) 2011          | 0.302 (0.219, 0.401)        | 29/96          |
| Philipp, C. S. (C, Questionnaire) 2008             | 0.201 (0.142, 0.278)        | 27/134         |
| Bidlingmaier, C. (C, ISTH Child BS) 2012           | 0.857 (0.760, 0.919)        | 66/77          |
| <b>Overall (I<sup>2</sup>=9744 %, P&lt; 0.001)</b> | <b>0.539 (0.293, 0.767)</b> | <b>483/863</b> |

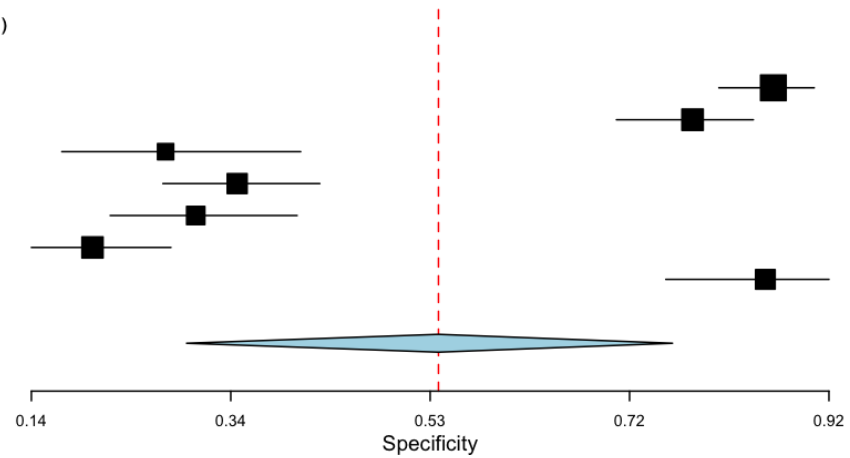

### 3. Outcomes:

- For overall population
  - Evidence profile:

|             |                             |
|-------------|-----------------------------|
| Sensitivity | 0.75 (95% CI: 0.66 to 0.83) |
| Specificity | 0.54 (95% CI: 0.29 to 0.77) |

|             |    |     |     |
|-------------|----|-----|-----|
| Prevalences | 3% | 20% | 50% |
|-------------|----|-----|-----|

| Outcome                                                                                   | No of studies (No of patients) | Study design                                 | Factors that may decrease certainty of evidence |              |                      |             |                  | Effect per 1,000 patients tested        |                                          |                                          | Test accuracy CoE |
|-------------------------------------------------------------------------------------------|--------------------------------|----------------------------------------------|-------------------------------------------------|--------------|----------------------|-------------|------------------|-----------------------------------------|------------------------------------------|------------------------------------------|-------------------|
|                                                                                           |                                |                                              | Risk of bias                                    | Indirectness | Inconsistency        | Imprecision | Publication bias | pre-test probability of 3% <sup>b</sup> | pre-test probability of 20% <sup>c</sup> | pre-test probability of 50% <sup>d</sup> |                   |
| <b>True positives</b> (patients with suspected patients)                                  | 7 studies<br>112 patients      | cross-sectional (cohort type accuracy study) | not serious                                     | not serious  | not serious          | not serious | none             | 23 (20 to 25)                           | 150 (132 to 165)                         | 376 (331 to 413)                         | ⊕⊕⊕⊕<br>HIGH      |
| <b>False negatives</b> (patients incorrectly classified as not having suspected patients) |                                |                                              |                                                 |              |                      |             |                  | 7 (5 to 10)                             | 50 (35 to 68)                            | 124 (87 to 169)                          |                   |
| <b>True negatives</b> (patients without suspected patients)                               | 7 studies<br>863 patients      | cross-sectional (cohort type accuracy study) | not serious                                     | not serious  | serious <sup>a</sup> | not serious | none             | 523 (284 to 744)                        | 431 (234 to 614)                         | 270 (147 to 384)                         | ⊕⊕⊕○<br>MODERATE  |
| <b>False positives</b> (patients incorrectly classified as having suspected patients)     |                                |                                              |                                                 |              |                      |             |                  | 447 (226 to 686)                        | 369 (186 to 566)                         | 230 (116 to 353)                         |                   |

*Explanations*

a. The point estimates of specificity are not homogenous which was not explained by the setting or risk of bias a priori .

b. Typically seen in patients investigated for VWD because of a personal history of abnormal laboratory test (e.g., increased PTT).

c. Typically seen in patients investigated for VWD because of a personal history of bleeding symptoms (e.g., mucocutaneous bleeding). - Quiroga, 2007.

d. Typically seen in in patients investigated for VWD as a first degree relative for a patient with VWD.

- For a pre-test probability of 3%, which is typically seen in patients investigated for VWD because of a personal history of abnormal laboratory test (e.g., increased PTT):

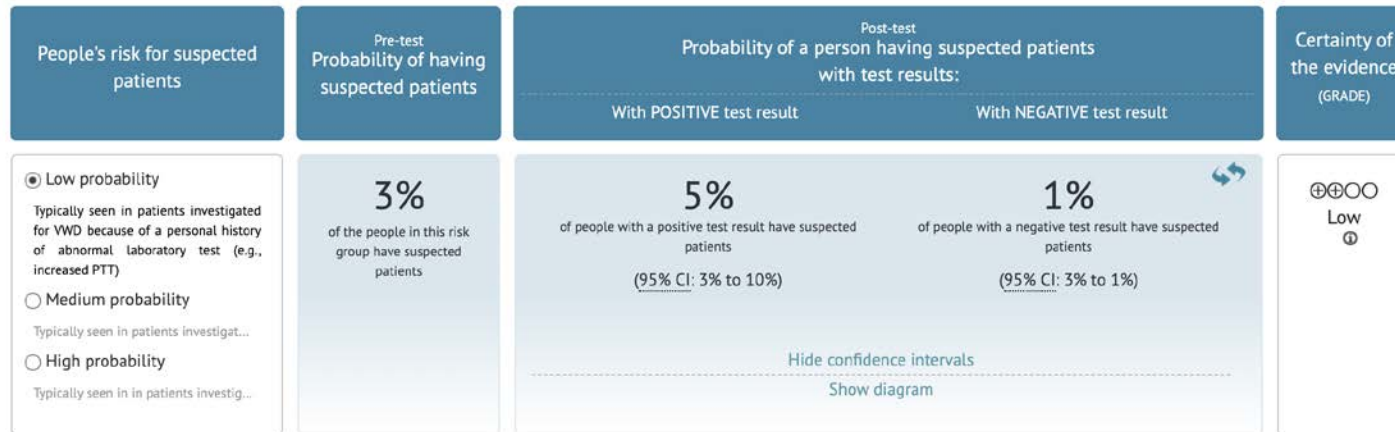

- . Out of 100 people with a positive BAT, **5** would actually have VWD and **95** would not have VWD
- . Out of 100 people with a negative BAT, **1** would actually have VWD and **99** would not have VWD

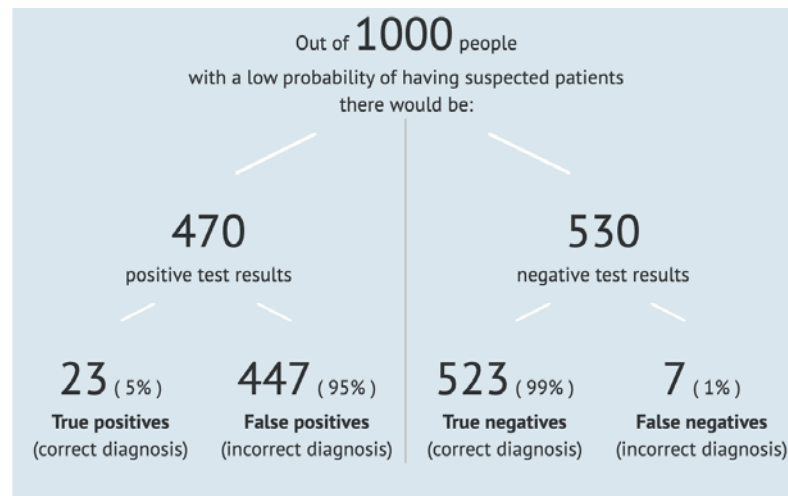





- . 470 out of 1000 people tested with BAT will have a "positive" test result: 23 of these will have VWD (true positive), However, 447 of these people will not have VWD, even though their test result was positive (false positive).
- . 530 out of 1000 people tested with BAT will have a "negative" test result. 523 of these will not have VWD (true negative). However, 7 of these people will actually have VWD, even though their test result was negative (false negative).



- . 30 people (out of 1000 people in the Low probability group) have (as yet undetected) VWD. Of the 1000 people who take Bleeding Assessment tool test: 23 people will be correctly identified as having VWD (true positives). However, 7 people with VWD will remain undetected; their "negative" BAT results will be incorrect (false negatives).
- . 970 people (out of 1000 people in the Low probability group) do not have VWD. Of the 1000 people who take the Bleeding Assessment tool test: 523 of these people will be correctly identified as not having VWD (true negatives). However, 447 people will be incorrectly identified; their "positive" test results will suggest they have VWD (false positives).

- For the pre-test probability of 20%, which is typically seen in patients investigated for VWD because of a personal history of bleeding symptoms (e.g., mucocutaneous bleeding), and the pre-test probability of 50%, which is typically seen in patients investigated for VWD as a first degree relative for a patient with VWD, the interactive summary of findings can be accessed using the following link:

[https://gdt.gradeapro.org/presentations/#/isof/isof\\_c5b33e22-a646-4654-9f09-b820aff36c5c-1569520689536? k=eump67](https://gdt.gradeapro.org/presentations/#/isof/isof_c5b33e22-a646-4654-9f09-b820aff36c5c-1569520689536? k=eump67)

## References:

1. Pathare A, Al Hajri, F., Al Omrani, S., Al Obaidani, N., Al Balushi, B., Al Falahi, K. Bleeding score in type 1 von Willebrand disease patients using the condensed MCMDM-1 vWD validated questionnaire. *International Journal of Laboratory Hematology*. 2018;40(5):515-520.
2. A. S. K. Faiz A, Guo, S., Murphy, S., Philipp, C. S. Screening of female family members of von Willebrand disease patients: utility of a modified screening tool in a high-risk population. *Haemophilia* 2017;23(5):736-742.
3. Malec LM, Moore, C. G., Bennett, C. M., Yee, D. L., Kerlin, B. A., Witmer, C. M., Kulkarni, R., Gupta, S., Gunawardena, S., Kouides, P. A., Brown, D., Ragni, M. V. Validation study of the composite score to identify von Willebrand disease in children. *Journal of Pediatric Hematology/Oncology*. 2016;38(2):139-140.
4. Mittal N, Naridze, R., James, P., Shott, S., Valentino, L. A. Utility of a Paediatric Bleeding Questionnaire as a screening tool for von Willebrand disease in apparently healthy children. *Haemophilia*. 2015;21(6):806-811.
5. Deforest M, Grabell, J., Albert, S., Young, J., Tuttle, A., Hopman, W. M., James, P. D. Generation and optimization of the self-administered bleeding assessment tool and its validation as a screening test for von Willebrand disease. *Haemophilia*. 2015;21(5):e384-e388.
6. Belen B, Kocak, U., Isik, M., Keskin, E. Y., Oner, N., Sal, E., Kaya, Z., Yenicesu, I., Gursel, T. Evaluation of Pediatric Bleeding Questionnaire in Turkish Children with von Willebrand Disease and Platelet Function Disorders. *Clinical and Applied Thrombosis/Hemostasis*. 2015;21(6):565-569.
7. Bidlingmaier C, Grote, V., Budde, U., Olivieri, M., Kurnik, K. Prospective evaluation of a pediatric bleeding questionnaire and the ISTH bleeding assessment tool in children and parents in routine clinical practice. *Journal of Thrombosis and Haemostasis*. 2012;10(7):1335-1341.
8. Marcus PD, Nire, K. G., Grooms, L., Klima, J., O'Brien S, H. The power of a standardized bleeding score in diagnosing paediatric type 1 von Willebrand's disease and platelet function defects. *Haemophilia*. 2011;17(2):223-227.
9. Bujnicki HC, Sidonio, R. F., Kempton, C., Kouides, P. A., Kulkarni, R., Nugent, D. J., Yee, D. L., Moore, C. G., Ragni, M. V. Screening for von Willebrand disease in children: a case-control study. *J Thromb Haemost*. 2011;9(5):1086-1089.
10. Bowman M, Riddel, J., Rand, M. L., Tosetto, A., Silva, M., James, P. D. Evaluation of the diagnostic utility for von Willebrand disease of a pediatric bleeding questionnaire. *Journal of Thrombosis and Haemostasis*. 2009;7(8):1418-1421.
11. Tosetto A, Castaman, G., Rodeghiero, F. Evidence-based diagnosis of type 1 von Willebrand disease: A Bayes theorem approach. *Blood*. 2008;111(8):3998-4003.
12. Philipp CS, Faiz, A., Dowling, N. F., Beckman, M., Owens, S., Ayers, C., Bachmann, G. Development of a screening tool for identifying women with menorrhagia for hemostatic evaluation. *American Journal of Obstetrics and Gynecology*. 2008;198(2):163.e161-163.e168.
13. Bowman M, Mundell, G., Grabell, J., Hopman, W. M., Rapson, D., Lillicrap, D., James, P. Generation and validation of the Condensed MCMDM-1VWD Bleeding Questionnaire for von Willebrand disease. *Journal of Thrombosis and Haemostasis*. 2008;6(12):2062-2066.
14. Tosetto A, Rodeghiero, F., Castaman, G., Goodeve, A., Federici, A. B., Batlle, J., Meyer, D., Fressinaud, E., Mazurier, C., Goudemand, J., Eikenboom, J., Schneppenheim, R., Budde, U., Ingerslev, J., Vorlova, Z., Habart, D., Holmberg, L., Lethagen, S., Pasi, J., Hill, F., Peake, I. A quantitative analysis of bleeding symptoms in type 1 von Willebrand disease: Results from a multicenter European study (MCMDM-1 VWD). *Journal of Thrombosis and Haemostasis*. 2006;4(4):766-773.
15. Rodeghiero F, Castaman, G., Tosetto, A., Batlle, J., Baudo, F., Cappelletti, A., Casana, P., De Bosch, N., Eikenboom, J. C., Federici, A. B., Lethagen, S., Linari, S., Srivastava, A. The discriminant power of bleeding history for the diagnosis of type 1 von Willebrand disease: an international, multicenter study.[Erratum appears in *J Thromb Haemost*. 2006 Apr;4(4):925]. *J Thromb Haemost*. 2005;3(12):2619-2626.

**Question 1 and 2 (50% )**

| Should a bleeding assessment tool be used to diagnose patients suspected of having von Willebrand Disease? |                                                                                                                                                                                                                                                                                                                                                                                                                                                                                                                                                                                                       |
|------------------------------------------------------------------------------------------------------------|-------------------------------------------------------------------------------------------------------------------------------------------------------------------------------------------------------------------------------------------------------------------------------------------------------------------------------------------------------------------------------------------------------------------------------------------------------------------------------------------------------------------------------------------------------------------------------------------------------|
| <b>POPULATION:</b>                                                                                         | Patients suspected of von Willebrand Disease                                                                                                                                                                                                                                                                                                                                                                                                                                                                                                                                                          |
| <b>INTERVENTION:</b>                                                                                       | Bleeding Assessment Tool                                                                                                                                                                                                                                                                                                                                                                                                                                                                                                                                                                              |
| <b>PURPOSE OF THE TEST:</b>                                                                                | Identify patients with VWD                                                                                                                                                                                                                                                                                                                                                                                                                                                                                                                                                                            |
| <b>ROLE OF THE TEST:</b>                                                                                   | Identify patients with VWD                                                                                                                                                                                                                                                                                                                                                                                                                                                                                                                                                                            |
| <b>LINKED TREATMENTS:</b>                                                                                  | Desmopressin, Tranexamic acid, Factor replacement                                                                                                                                                                                                                                                                                                                                                                                                                                                                                                                                                     |
| <b>ANTICIPATED OUTCOMES:</b>                                                                               | BATs – False positive, BATs – False negative, BATs – True positive, BATs – True negative Major bleeding, transfusion and treatment, blood loss, gastrointestinal bleeding, symptom severity, minor bleeding, mortality.                                                                                                                                                                                                                                                                                                                                                                               |
| <b>SETTING:</b>                                                                                            | Outpatient                                                                                                                                                                                                                                                                                                                                                                                                                                                                                                                                                                                            |
| <b>PERSPECTIVE:</b>                                                                                        | Clinical recommendation – population perspective                                                                                                                                                                                                                                                                                                                                                                                                                                                                                                                                                      |
| <b>BACKGROUND:</b>                                                                                         | Von Willebrand disease (VWD) is the most common inherited bleeding disorder known in humans: while estimated to affect between 0.1 and 1% of the general population, many are never diagnosed. Assessment of the severity of bleeding symptoms is challenging because of the difficulties in reporting subjective bleeding symptoms in a consistent way. The importance of the problem arises from the necessity of assessing the bleeding history to limit the need for unnecessary laboratory testing and also to avoid false-positive cases that are possible when diagnosing VWD. (Pathare, 2018) |
| <b>SUBGROUPS:</b>                                                                                          | This recommendation addresses patients with a VWD pretest probability of 50%, the typical incidence of VWD in patients referred because of a first degree relative with VWD regardless of their bleeding symptoms (including the pediatric population).                                                                                                                                                                                                                                                                                                                                               |
| <b>CONFLICT OF INTERESTS:</b>                                                                              | ASH conflict of interest declaration and management policies were applied, and the following panel members were voting panel members (determining the direction and strength of the recommendation): Sandra Haberichter, Jeroen Eikenboom, Barbara Konkle, Robert Sidonio Jr, Simon McRae, Robert Montgomery, James O'Donnell, Claire McLintock, Barbara Ameer, Nicolas Giraud, Nikole Scappe, Vicki Jacobs-Pratt, Paula James, Nathan Connell.<br><br>No panel members recused as a result of risk of conflicts of interest.                                                                         |



## ASSESSMENT

| Problem                                                                                                                                                                                                                                               |                                                                                                                                                                                                                                                                                                                                                                     |                                                                                                                 |
|-------------------------------------------------------------------------------------------------------------------------------------------------------------------------------------------------------------------------------------------------------|---------------------------------------------------------------------------------------------------------------------------------------------------------------------------------------------------------------------------------------------------------------------------------------------------------------------------------------------------------------------|-----------------------------------------------------------------------------------------------------------------|
| Is the problem a priority?                                                                                                                                                                                                                            |                                                                                                                                                                                                                                                                                                                                                                     |                                                                                                                 |
| JUDGEMENT                                                                                                                                                                                                                                             | RESEARCH EVIDENCE                                                                                                                                                                                                                                                                                                                                                   | ADDITIONAL CONSIDERATIONS                                                                                       |
| <ul style="list-style-type: none"> <li><input type="radio"/> No</li> <li><input type="radio"/> Probably no</li> <li><input type="radio"/> Probably yes</li> <li><input checked="" type="radio"/> Yes</li> <li><input type="radio"/> Varies</li> </ul> | <p>Von Willebrand disease (VWD) is the most common inherited bleeding disorder known in humans: while estimated to affect between 0.1 and 1% of the general population, many are never diagnosed. Assessment of the severity of bleeding symptoms is challenging because of the difficulties in reporting subjective bleeding symptoms in a consistent way. The</p> | <p>This question was judged to be a priority among many candidate questions to address in these guidelines.</p> |

|                                                                |                                                                                                                                                                                                                                                 |  |
|----------------------------------------------------------------|-------------------------------------------------------------------------------------------------------------------------------------------------------------------------------------------------------------------------------------------------|--|
| <ul style="list-style-type: none"> <li>○ Don't know</li> </ul> | <p>importance of the problem arises from the necessity of assessing the bleeding history to limit the need for unnecessary laboratory testing and also to avoid false-positive cases that are possible when diagnosing VWD. (Pathare, 2018)</p> |  |
|----------------------------------------------------------------|-------------------------------------------------------------------------------------------------------------------------------------------------------------------------------------------------------------------------------------------------|--|

**Test accuracy**  
How accurate is the test?

| JUDGEMENT                                                                                                                                                                      | RESEARCH EVIDENCE                                                                                                                                                                                                                                                                                                                                                                                                                                                                                                                                                                                                                                                                                                                                                                                                                                                                                                                                                                                                                                                                                                                                                           | ADDITIONAL CONSIDERATIONS     |                                                               |                   |                                                               |                |                                              |              |                  |                 |                 |                |                                              |                               |                  |                 |                  |                                                                                                                                                                                                                                                                                                                                                                                                                      |
|--------------------------------------------------------------------------------------------------------------------------------------------------------------------------------|-----------------------------------------------------------------------------------------------------------------------------------------------------------------------------------------------------------------------------------------------------------------------------------------------------------------------------------------------------------------------------------------------------------------------------------------------------------------------------------------------------------------------------------------------------------------------------------------------------------------------------------------------------------------------------------------------------------------------------------------------------------------------------------------------------------------------------------------------------------------------------------------------------------------------------------------------------------------------------------------------------------------------------------------------------------------------------------------------------------------------------------------------------------------------------|-------------------------------|---------------------------------------------------------------|-------------------|---------------------------------------------------------------|----------------|----------------------------------------------|--------------|------------------|-----------------|-----------------|----------------|----------------------------------------------|-------------------------------|------------------|-----------------|------------------|----------------------------------------------------------------------------------------------------------------------------------------------------------------------------------------------------------------------------------------------------------------------------------------------------------------------------------------------------------------------------------------------------------------------|
| <ul style="list-style-type: none"> <li>● Very inaccurate</li> <li>○ Inaccurate</li> <li>○ Accurate</li> <li>○ Very accurate</li> <li>○ Varies</li> <li>○ Don't know</li> </ul> | <p>Pooled sensitivity across 7 cohort studies with 112 patients was 0.75 (95% CI: 0.66 to 0.83)<br/> Pooled specificity across 7 cohort studies with 863 patients was 0.54 (95% CI: 0.29 to 0.77)</p> <table border="1" data-bbox="518 565 1388 1084"> <thead> <tr> <th>Outcome</th> <th>Study design</th> <th>Test accuracy CoE</th> <th>Effect per 1000 patients/year for pre-test probability of 50%</th> </tr> </thead> <tbody> <tr> <td>True positives</td> <td rowspan="2">cross-sectional (cohort type accuracy study)</td> <td rowspan="2">⊕⊕⊕⊕<br/>HIGH</td> <td>376 (331 to 413)</td> </tr> <tr> <td>False negatives</td> <td>124 (87 to 169)</td> </tr> <tr> <td>True negatives</td> <td rowspan="2">cross-sectional (cohort type accuracy study)</td> <td rowspan="2">⊕⊕⊕○<br/>MODERATE<sup>a</sup></td> <td>270 (147 to 384)</td> </tr> <tr> <td>False positives</td> <td>230 (116 to 353)</td> </tr> </tbody> </table> <p>a. The heterogeneity measurement I2 is 98%, and the point estimates of specificity are not homogenous which cannot be explained by the setting or risk of bias a priori</p> <p>Refer to the Appendix at the end of the document</p> | Outcome                       | Study design                                                  | Test accuracy CoE | Effect per 1000 patients/year for pre-test probability of 50% | True positives | cross-sectional (cohort type accuracy study) | ⊕⊕⊕⊕<br>HIGH | 376 (331 to 413) | False negatives | 124 (87 to 169) | True negatives | cross-sectional (cohort type accuracy study) | ⊕⊕⊕○<br>MODERATE <sup>a</sup> | 270 (147 to 384) | False positives | 230 (116 to 353) | <p>The studies assess Bleeding Assessment Tools (BATs) versus non-BATs and do not compare BATs with non-standardized testing. The panel judged the test accuracy to be very inaccurate for patients with a pretest probability of 50%, the typical incidence of VWD in patients referred because of a first degree relative with VWD regardless of their bleeding symptoms (including the pediatric population).</p> |
| Outcome                                                                                                                                                                        | Study design                                                                                                                                                                                                                                                                                                                                                                                                                                                                                                                                                                                                                                                                                                                                                                                                                                                                                                                                                                                                                                                                                                                                                                | Test accuracy CoE             | Effect per 1000 patients/year for pre-test probability of 50% |                   |                                                               |                |                                              |              |                  |                 |                 |                |                                              |                               |                  |                 |                  |                                                                                                                                                                                                                                                                                                                                                                                                                      |
| True positives                                                                                                                                                                 | cross-sectional (cohort type accuracy study)                                                                                                                                                                                                                                                                                                                                                                                                                                                                                                                                                                                                                                                                                                                                                                                                                                                                                                                                                                                                                                                                                                                                | ⊕⊕⊕⊕<br>HIGH                  | 376 (331 to 413)                                              |                   |                                                               |                |                                              |              |                  |                 |                 |                |                                              |                               |                  |                 |                  |                                                                                                                                                                                                                                                                                                                                                                                                                      |
| False negatives                                                                                                                                                                |                                                                                                                                                                                                                                                                                                                                                                                                                                                                                                                                                                                                                                                                                                                                                                                                                                                                                                                                                                                                                                                                                                                                                                             |                               | 124 (87 to 169)                                               |                   |                                                               |                |                                              |              |                  |                 |                 |                |                                              |                               |                  |                 |                  |                                                                                                                                                                                                                                                                                                                                                                                                                      |
| True negatives                                                                                                                                                                 | cross-sectional (cohort type accuracy study)                                                                                                                                                                                                                                                                                                                                                                                                                                                                                                                                                                                                                                                                                                                                                                                                                                                                                                                                                                                                                                                                                                                                | ⊕⊕⊕○<br>MODERATE <sup>a</sup> | 270 (147 to 384)                                              |                   |                                                               |                |                                              |              |                  |                 |                 |                |                                              |                               |                  |                 |                  |                                                                                                                                                                                                                                                                                                                                                                                                                      |
| False positives                                                                                                                                                                |                                                                                                                                                                                                                                                                                                                                                                                                                                                                                                                                                                                                                                                                                                                                                                                                                                                                                                                                                                                                                                                                                                                                                                             |                               | 230 (116 to 353)                                              |                   |                                                               |                |                                              |              |                  |                 |                 |                |                                              |                               |                  |                 |                  |                                                                                                                                                                                                                                                                                                                                                                                                                      |

**Desirable Effects**  
How substantial are the desirable anticipated effects?

| JUDGEMENT                                                                                                                                                 | RESEARCH EVIDENCE                                                                                                                                                                                                                                                                                                                                                                                                                                                                                                                                                                                                                                                                                                                                                                                                                                                                                                                                                                                                                                                                                                                                                              | ADDITIONAL CONSIDERATIONS                                                                                                                                                                                                                                                                                                                                                                                                                                                                                                                                                     |
|-----------------------------------------------------------------------------------------------------------------------------------------------------------|--------------------------------------------------------------------------------------------------------------------------------------------------------------------------------------------------------------------------------------------------------------------------------------------------------------------------------------------------------------------------------------------------------------------------------------------------------------------------------------------------------------------------------------------------------------------------------------------------------------------------------------------------------------------------------------------------------------------------------------------------------------------------------------------------------------------------------------------------------------------------------------------------------------------------------------------------------------------------------------------------------------------------------------------------------------------------------------------------------------------------------------------------------------------------------|-------------------------------------------------------------------------------------------------------------------------------------------------------------------------------------------------------------------------------------------------------------------------------------------------------------------------------------------------------------------------------------------------------------------------------------------------------------------------------------------------------------------------------------------------------------------------------|
| <ul style="list-style-type: none"> <li>● Trivial</li> <li>○ Small</li> <li>○ Moderate</li> <li>○ Large</li> <li>○ Varies</li> <li>○ Don't know</li> </ul> | <p><b>True Positive:</b> These are patients who have VWD and who received preventive and appropriate treatment. They benefit from decreasing the risk of bleeding with treatment and they suffer the side effects of treatment.</p> <p><b>True Negative:</b> These are patients who did not have VWD and who were correctly identified as not having the disease. They will appropriately not receive treatment for VWD and not suffer the side effects of treatment.</p> <p><b>False Negative:</b> These are patients who have VWD but the diagnosis was missed and will be sent home without appropriate treatment. They face the risks of prolonged and heavy bleeding due to not receiving treatment.</p> <p><b>False Positive:</b> These are individuals who do not have VWD but they will be labeled as potentially having a bleeding disorder by the BATs. Most of these patients will be reassured of not having VWD when they get additional blood testing. These patients may benefit from the treatment if they have other bleeding disorders, but they will also suffer the side effects of treatment.</p> <p>Refer to the Appendix at the end of the document</p> | <p>The benefit of a BAT is to identify patients who have VWD, who will be missed without this tool in the clinic. Using a BATs will allow for the quantification of bleeding symptoms in patients.</p> <p>The panel considered not missing a patient with VWD as the most important desirable effect, in addition to identify patients in a timely manner, in the appropriate center and to decrease unnecessary blood testing.</p> <p>BATs are educationally beneficial for patients and clinical experts and provides validation for patients about having the disease.</p> |

### Undesirable Effects

How substantial are the undesirable anticipated effects?

| JUDGEMENT                                                                                                                                                 | RESEARCH EVIDENCE                                                                                                                                                                                                                                                                                                                                                                                                                                                                                                                                                                                                                                                                                                                                                                                                                                                                                                                                                                                                                   | ADDITIONAL CONSIDERATIONS |
|-----------------------------------------------------------------------------------------------------------------------------------------------------------|-------------------------------------------------------------------------------------------------------------------------------------------------------------------------------------------------------------------------------------------------------------------------------------------------------------------------------------------------------------------------------------------------------------------------------------------------------------------------------------------------------------------------------------------------------------------------------------------------------------------------------------------------------------------------------------------------------------------------------------------------------------------------------------------------------------------------------------------------------------------------------------------------------------------------------------------------------------------------------------------------------------------------------------|---------------------------|
| <ul style="list-style-type: none"> <li>● Large</li> <li>○ Moderate</li> <li>○ Small</li> <li>○ Trivial</li> <li>○ Varies</li> <li>○ Don't know</li> </ul> | <p><b>True Positive:</b> These are patients who have VWD and who received preventive and appropriate treatment. They benefit from decreasing the risk of bleeding with treatment and they suffer the side effects of treatment.</p> <p><b>True Negative:</b> These are patients who did not have VWD and who were correctly identified as not having the disease. They will appropriately not receive treatment for VWD and not suffer the side effects of treatment.</p> <p><b>False Negative:</b> These are patients who have VWD but the diagnosis was missed and will be sent home without appropriate treatment. They face the risks of prolonged and heavy bleeding due to not receiving treatment.</p> <p><b>False Positive:</b> These are individuals who do not have VWD but they will be labeled as potentially having a bleeding disorder by the BATs. Most of these patients will be reassured of not having VWD when they get additional blood testing. These patients may benefit from the treatment if they have</p> |                           |

|  |                                                                                                                                                   |  |
|--|---------------------------------------------------------------------------------------------------------------------------------------------------|--|
|  | <p>other bleeding disorders, but they will also suffer the side effects of treatment.</p> <p>Refer to the Appendix at the end of the document</p> |  |
|--|---------------------------------------------------------------------------------------------------------------------------------------------------|--|

**Certainty of the evidence of test accuracy**  
 What is the overall certainty of the evidence of test accuracy?

| JUDGEMENT                                                                                                                                      | RESEARCH EVIDENCE                                                                                                                                                                                                                                                                                                                                                                                                                                                                  | ADDITIONAL CONSIDERATIONS                                                                                                                                                                                                                                                                                                                |
|------------------------------------------------------------------------------------------------------------------------------------------------|------------------------------------------------------------------------------------------------------------------------------------------------------------------------------------------------------------------------------------------------------------------------------------------------------------------------------------------------------------------------------------------------------------------------------------------------------------------------------------|------------------------------------------------------------------------------------------------------------------------------------------------------------------------------------------------------------------------------------------------------------------------------------------------------------------------------------------|
| <ul style="list-style-type: none"> <li>○ Very low</li> <li>○ Low</li> <li>● Moderate</li> <li>○ High</li> <li>○ No included studies</li> </ul> | <p>The risk of bias assessed using the QUADAS tool is not serious. Additionally, the articles addressed the PICO question directly and the results were precise. However, the point estimates of specificity are not homogenous which was not explained by the setting or risk of bias a priori. This gives an overall high certainty of evidence for sensitivity and moderate certainty of evidence for specificity.</p> <p>Refer to the Appendix at the end of the document.</p> | <p>The data presented in the studies consider mostly women. It is important also to consider BATs in the pediatric population, as children might have a negative bleeding score due to lack of adequate bleeding challenges. The bleeding score may become positive with age. Men are more likely to have a negative bleeding score.</p> |

**Certainty of the evidence of test's effects**  
 What is the overall certainty of the evidence for any critical or important direct benefits, adverse effects or burden of the test?

| JUDGEMENT                                                                                                                                      | RESEARCH EVIDENCE                                                                                             | ADDITIONAL CONSIDERATIONS |
|------------------------------------------------------------------------------------------------------------------------------------------------|---------------------------------------------------------------------------------------------------------------|---------------------------|
| <ul style="list-style-type: none"> <li>○ Very low</li> <li>○ Low</li> <li>○ Moderate</li> <li>○ High</li> <li>● No included studies</li> </ul> | <p>There are no relevant test effects since the intervention is a questionnaire and not an invasive test.</p> |                           |

**Certainty of the evidence of management's effects**  
 What is the overall certainty of the evidence of effects of the management that is guided by the test results?

| JUDGEMENT                                                                   | RESEARCH EVIDENCE | ADDITIONAL CONSIDERATIONS                                                                                  |
|-----------------------------------------------------------------------------|-------------------|------------------------------------------------------------------------------------------------------------|
| <ul style="list-style-type: none"> <li>○ Very low</li> <li>○ Low</li> </ul> |                   | <p>Despite the lack of included studies, there is <b>variability and inconsistency</b> in what happens</p> |



|                                                                                                             |  |                                                                                                                                                                                                                                                                                                                                    |
|-------------------------------------------------------------------------------------------------------------|--|------------------------------------------------------------------------------------------------------------------------------------------------------------------------------------------------------------------------------------------------------------------------------------------------------------------------------------|
| <ul style="list-style-type: none"> <li>○ Moderate</li> <li>○ High</li> <li>● No included studies</li> </ul> |  | <p>to patients during their diagnostic journey. Early detection of mild disease may help in management, especially in women who face additional bleeding challenges during reproductive years.</p> <p>Patients in the primary care setting (pre-test probability 3%) who are not recognized as having VWD will not be treated.</p> |
|-------------------------------------------------------------------------------------------------------------|--|------------------------------------------------------------------------------------------------------------------------------------------------------------------------------------------------------------------------------------------------------------------------------------------------------------------------------------|

**Certainty of the evidence of test result/management**

How certain is the link between test results and management decisions?

| <b>JUDGEMENT</b>                                                                                                                               | <b>RESEARCH EVIDENCE</b> | <b>ADDITIONAL CONSIDERATIONS</b>                                                                                                                                                                                                                                                                                                                                                                                                        |
|------------------------------------------------------------------------------------------------------------------------------------------------|--------------------------|-----------------------------------------------------------------------------------------------------------------------------------------------------------------------------------------------------------------------------------------------------------------------------------------------------------------------------------------------------------------------------------------------------------------------------------------|
| <ul style="list-style-type: none"> <li>○ Very low</li> <li>○ Low</li> <li>○ Moderate</li> <li>○ High</li> <li>● No included studies</li> </ul> |                          | <p>The diagnosis of VWD is challenging and requires the performance of multiple laboratory tests, that will also determine the type of the disease. There are some limitations in laboratory diagnostic tests as well as overlapping nonspecific mild bleeding symptoms between healthy individuals and VWD patients. Conducting a Bleeding Assessment Tool will guide the healthcare provider to perform laboratory tests for VWD.</p> |

**Certainty of effects**

What is the overall certainty of the evidence of effects of the test?

| <b>JUDGEMENT</b>                                                                                                                               | <b>RESEARCH EVIDENCE</b>                                 | <b>ADDITIONAL CONSIDERATIONS</b> |
|------------------------------------------------------------------------------------------------------------------------------------------------|----------------------------------------------------------|----------------------------------|
| <ul style="list-style-type: none"> <li>○ Very low</li> <li>● Low</li> <li>○ Moderate</li> <li>○ High</li> <li>○ No included studies</li> </ul> | <p>Refer to the Appendix at the end of the document.</p> |                                  |

**Values**

Is there important uncertainty about or variability in how much people value the main outcomes?

| <b>JUDGEMENT</b>                                                                         | <b>RESEARCH EVIDENCE</b> | <b>ADDITIONAL CONSIDERATIONS</b>                                                               |
|------------------------------------------------------------------------------------------|--------------------------|------------------------------------------------------------------------------------------------|
| <ul style="list-style-type: none"> <li>○ Important uncertainty or variability</li> </ul> |                          | <p>Patients place high value on being heard, not having their diagnosis missed, and having</p> |

|                                                                                                                                                                                                                  |  |                                                                                                                                                                                                                                                                                                                                                                                                                                                                                                                                                                                                                                                                                                                                                                                                                                                                                                                                                                                                                                                                                                                                                                                                                                                                                                                                                                                                                                                                                                                       |
|------------------------------------------------------------------------------------------------------------------------------------------------------------------------------------------------------------------|--|-----------------------------------------------------------------------------------------------------------------------------------------------------------------------------------------------------------------------------------------------------------------------------------------------------------------------------------------------------------------------------------------------------------------------------------------------------------------------------------------------------------------------------------------------------------------------------------------------------------------------------------------------------------------------------------------------------------------------------------------------------------------------------------------------------------------------------------------------------------------------------------------------------------------------------------------------------------------------------------------------------------------------------------------------------------------------------------------------------------------------------------------------------------------------------------------------------------------------------------------------------------------------------------------------------------------------------------------------------------------------------------------------------------------------------------------------------------------------------------------------------------------------|
| <ul style="list-style-type: none"> <li>○ Possibly important uncertainty or variability</li> <li>● Probably no important uncertainty or variability</li> <li>○ No important uncertainty or variability</li> </ul> |  | <p>guidance on appropriate management. Patients value the clarity and precise questions provided by the BATs. They benefit from the standardized and objective way of obtaining bleeding data and would expect the use of non-standardized testing to be poorly received due to the perception of being less reliable. Moreover, patients appreciate their direct input into the collection of personal medical history for making or confirming a diagnosis. Patients think of BATs as similar to surveys given to patients for other diagnoses in internal medicine or family medicine. On the other hand, although BATs are useful adjunct, patients may feel that their story is devalued if reduced entirely to a questionnaire. Since the answers in a structured questionnaire are less subtle than in open questions, patients may prefer an open discussion with the healthcare provider, rather than only a structured questionnaire that may not account for all their bleeding symptoms. Patients might want to know that blood tests are negative even if they have a negative bleeding score, especially if they were told they have VWD, bringing a concern of underdiagnosis or overtreatment; so patients may value a blood test more than BATs for confirmation of diagnosis, regardless of the bleeding score. Finally, privacy and security of sensitive health data are concerns to some patients with online BATs, however there is no universal online BAT that is currently administered.</p> |
|------------------------------------------------------------------------------------------------------------------------------------------------------------------------------------------------------------------|--|-----------------------------------------------------------------------------------------------------------------------------------------------------------------------------------------------------------------------------------------------------------------------------------------------------------------------------------------------------------------------------------------------------------------------------------------------------------------------------------------------------------------------------------------------------------------------------------------------------------------------------------------------------------------------------------------------------------------------------------------------------------------------------------------------------------------------------------------------------------------------------------------------------------------------------------------------------------------------------------------------------------------------------------------------------------------------------------------------------------------------------------------------------------------------------------------------------------------------------------------------------------------------------------------------------------------------------------------------------------------------------------------------------------------------------------------------------------------------------------------------------------------------|

**Balance of effects**  
Does the balance between desirable and undesirable effects favor the intervention or the comparison?

|                  |                          |                                  |
|------------------|--------------------------|----------------------------------|
| <b>JUDGEMENT</b> | <b>RESEARCH EVIDENCE</b> | <b>ADDITIONAL CONSIDERATIONS</b> |
|------------------|--------------------------|----------------------------------|

|                                                                                                                                                                                                                                                                                                                |                                                          |                                                                                                                                                                                  |
|----------------------------------------------------------------------------------------------------------------------------------------------------------------------------------------------------------------------------------------------------------------------------------------------------------------|----------------------------------------------------------|----------------------------------------------------------------------------------------------------------------------------------------------------------------------------------|
| <ul style="list-style-type: none"> <li>○ Favors the comparison</li> <li>● Probably favors the comparison</li> <li>○ Does not favor either the intervention or the comparison</li> <li>○ Probably favors the intervention</li> <li>○ Favors the intervention</li> <li>○ Varies</li> <li>○ Don't know</li> </ul> | <p>Refer to the Appendix at the end of the document.</p> | <p>There is an increasing need to use validated, standardized and sensitive bleeding questionnaires to assist in the determination of both the presence and severity of VWD.</p> |
|----------------------------------------------------------------------------------------------------------------------------------------------------------------------------------------------------------------------------------------------------------------------------------------------------------------|----------------------------------------------------------|----------------------------------------------------------------------------------------------------------------------------------------------------------------------------------|

**Resources required**  
How large are the resource requirements (costs)?

| <b>JUDGEMENT</b>                                                                                                                                                                                                               | <b>RESEARCH EVIDENCE</b> | <b>ADDITIONAL CONSIDERATIONS</b>                                                                                                                                                                                                                                                                        |
|--------------------------------------------------------------------------------------------------------------------------------------------------------------------------------------------------------------------------------|--------------------------|---------------------------------------------------------------------------------------------------------------------------------------------------------------------------------------------------------------------------------------------------------------------------------------------------------|
| <ul style="list-style-type: none"> <li>○ Large costs</li> <li>● Moderate costs</li> <li>○ Negligible costs and savings</li> <li>○ Moderate savings</li> <li>○ Large savings</li> <li>○ Varies</li> <li>○ Don't know</li> </ul> |                          | <p>No resources are required to conduct BATs, except time (including training/educating the provider to administer BATs), which is important in the clinical setting. However, not blood testing patients with a 20-50% pretest probability will lead to additional costs if a diagnosis is missed.</p> |

**Certainty of evidence of required resources**  
What is the certainty of the evidence of resource requirements (costs)?

| <b>JUDGEMENT</b>                                                                                                                               | <b>RESEARCH EVIDENCE</b> | <b>ADDITIONAL CONSIDERATIONS</b>                                                                                                                                                                                                                                    |
|------------------------------------------------------------------------------------------------------------------------------------------------|--------------------------|---------------------------------------------------------------------------------------------------------------------------------------------------------------------------------------------------------------------------------------------------------------------|
| <ul style="list-style-type: none"> <li>○ Very low</li> <li>○ Low</li> <li>○ Moderate</li> <li>○ High</li> <li>● No included studies</li> </ul> |                          | <p>No additional financial resources are required to administer BATs, except time (including training/educating the provider to administer BATs), which is important in the clinical setting. Doing BATs in this population would lead to net moderate savings.</p> |

**Cost effectiveness**  
Does the cost-effectiveness of the intervention favor the intervention or the comparison?

| JUDGEMENT                                                                                                                                                                                                                                                                                                                                                                                                                                                                      | RESEARCH EVIDENCE                                                                                                                                                                                                                                                                                                                                                                                                                                                                                                                                                               | ADDITIONAL CONSIDERATIONS |
|--------------------------------------------------------------------------------------------------------------------------------------------------------------------------------------------------------------------------------------------------------------------------------------------------------------------------------------------------------------------------------------------------------------------------------------------------------------------------------|---------------------------------------------------------------------------------------------------------------------------------------------------------------------------------------------------------------------------------------------------------------------------------------------------------------------------------------------------------------------------------------------------------------------------------------------------------------------------------------------------------------------------------------------------------------------------------|---------------------------|
| <ul style="list-style-type: none"> <li><input type="radio"/> Favors the comparison</li> <li><input checked="" type="radio"/> Probably favors the comparison</li> <li><input type="radio"/> Does not favor either the intervention or the comparison</li> <li><input type="radio"/> Probably favors the intervention</li> <li><input type="radio"/> Favors the intervention</li> <li><input type="radio"/> Varies</li> <li><input type="radio"/> No included studies</li> </ul> | <p>In a Markov decision analytic model taking a societal perspective and costs expressed in 2007 US dollars, the cost of testing adolescents with menorrhagia for VWD was \$1790, versus \$1251 for not testing for VWD. The effectiveness of not testing in quality-adjusted life-years (QALYs) gained (14.237 QALYs) was similar to the VWD testing strategy (14.246 QALYs). Compared with not testing for VWD, screening for VWD had an incremental cost-effectiveness ratio of \$62 791 per QALY, a value typically considered economically reasonable (Sidonio, 2010).</p> |                           |

**Equity**  
What would be the impact on health equity?

| JUDGEMENT                                                                                                                                                                                                                                                                                                                                                               | RESEARCH EVIDENCE | ADDITIONAL CONSIDERATIONS                                                                                                                                                                                                                                                                                                                                                                        |
|-------------------------------------------------------------------------------------------------------------------------------------------------------------------------------------------------------------------------------------------------------------------------------------------------------------------------------------------------------------------------|-------------------|--------------------------------------------------------------------------------------------------------------------------------------------------------------------------------------------------------------------------------------------------------------------------------------------------------------------------------------------------------------------------------------------------|
| <ul style="list-style-type: none"> <li><input type="radio"/> Reduced</li> <li><input checked="" type="radio"/> Probably reduced</li> <li><input type="radio"/> Probably no impact</li> <li><input type="radio"/> Probably increased</li> <li><input type="radio"/> Increased</li> <li><input type="radio"/> Varies</li> <li><input type="radio"/> Don't know</li> </ul> |                   | <p>BATs are generally available for all patients, which might help patients receive equitable care. More work has been done with BATs in English language than other languages, although the ISTH-BAT has been translated and is available in German, Italian, Norwegian and Spanish. Not doing blood testing in a patient with a first degree relative with VWD would reduce health equity.</p> |

**Acceptability**  
Is the intervention acceptable to key stakeholders?

| JUDGEMENT                                                                                                                                                                                                                                                                                       | RESEARCH EVIDENCE | ADDITIONAL CONSIDERATIONS                                                        |
|-------------------------------------------------------------------------------------------------------------------------------------------------------------------------------------------------------------------------------------------------------------------------------------------------|-------------------|----------------------------------------------------------------------------------|
| <ul style="list-style-type: none"> <li><input type="radio"/> No</li> <li><input type="radio"/> Probably no</li> <li><input type="radio"/> Probably yes</li> <li><input checked="" type="radio"/> Yes</li> <li><input type="radio"/> Varies</li> <li><input type="radio"/> Don't know</li> </ul> |                   | <p>BATs are generally accepted by all patients with a family history of VWD.</p> |

**Feasibility**

Is the intervention feasible to implement?

| <b>JUDGEMENT</b>                                                                                                                                      | <b>RESEARCH EVIDENCE</b> | <b>ADDITIONAL CONSIDERATIONS</b>                                                                                                                                                                                                                                                                                                                                                                                                                                                                                                                                                                                                                                                                                                                                                                                                                                                                                                                                                                                                                                                                                                                                                                                                                                                                                                                                                                                                                                                                                                                             |
|-------------------------------------------------------------------------------------------------------------------------------------------------------|--------------------------|--------------------------------------------------------------------------------------------------------------------------------------------------------------------------------------------------------------------------------------------------------------------------------------------------------------------------------------------------------------------------------------------------------------------------------------------------------------------------------------------------------------------------------------------------------------------------------------------------------------------------------------------------------------------------------------------------------------------------------------------------------------------------------------------------------------------------------------------------------------------------------------------------------------------------------------------------------------------------------------------------------------------------------------------------------------------------------------------------------------------------------------------------------------------------------------------------------------------------------------------------------------------------------------------------------------------------------------------------------------------------------------------------------------------------------------------------------------------------------------------------------------------------------------------------------------|
| <ul style="list-style-type: none"><li>○ No</li><li>○ Probably no</li><li>○ Probably yes</li><li>○ Yes</li><li>● Varies</li><li>○ Don't know</li></ul> |                          | <p>BATs might be less feasible in the primary care setting because of the need for additional resources (ie: time) when administering the questionnaire although this varies depending on the setting.</p> <p>With minimal training, the BATs may be administered by any healthcare professional (usually nursing staff or clinicians); self-administered versions are also available for patients to complete unassisted. The healthcare professional should be very familiar with bleeding disorders to tease out information from the patient who may not realize that they have more symptoms than they appreciate. If administered by clinicians, the tool needs to have minimal risk of interpretation errors such as subjective judgment differences between clinicians. The Self-BAT minimizes the errors using lay terms without complex definitions and criteria. The data are collected through paper or electronic record after face to face or phone interview. Currently, paper-based is the most used way of collecting the data, computer-assisted BATs to rapidly pass through negative domains would be useful while taking into consideration the resource implications. It usually takes 10-20 minutes to complete the BATs, but may take up to 30 minutes depending on the version. Time use may have a feasibility implication, but the panel felt BATs are often quicker than unstructured history for bleeding symptoms. BATs become time-consuming specifically when administered by the nursing staff seeing a large volume of</p> |

|  |  |                                                                                                                                                                                                                                                                                                                                                                                                                                                                                                                                                                                                                                                                                         |
|--|--|-----------------------------------------------------------------------------------------------------------------------------------------------------------------------------------------------------------------------------------------------------------------------------------------------------------------------------------------------------------------------------------------------------------------------------------------------------------------------------------------------------------------------------------------------------------------------------------------------------------------------------------------------------------------------------------------|
|  |  | <p>patients.</p> <p>The question tackles using the BATs in secondary care. The primary screening would have been already performed by the primary care provider. This means that the incidence of bleeding problems is increased and the ability of the BATs alone to exclude a bleeding problem is limited (like d-dimer for thrombosis). The current BATs (e.g. ISTH, Self BAT, PBQ, etc) were not developed to serve primarily as a diagnostic tool, but to stratify patients in large cohort studies. Although a normal bleeding score and negative screening tests mean that no additional testing is needed, a normal bleeding score is not enough to rule out the diagnosis.</p> |
|--|--|-----------------------------------------------------------------------------------------------------------------------------------------------------------------------------------------------------------------------------------------------------------------------------------------------------------------------------------------------------------------------------------------------------------------------------------------------------------------------------------------------------------------------------------------------------------------------------------------------------------------------------------------------------------------------------------------|

#### SUMMARY OF JUDGEMENTS

|                                                          | JUDGEMENT              |             |                 |               |  |        |                            |
|----------------------------------------------------------|------------------------|-------------|-----------------|---------------|--|--------|----------------------------|
| <b>PROBLEM</b>                                           | No                     | Probably no | Probably yes    | <b>Yes</b>    |  | Varies | Don't know                 |
| <b>TEST ACCURACY</b>                                     | <b>Very inaccurate</b> | Inaccurate  | Accurate        | Very accurate |  | Varies | Don't know                 |
| <b>DESIRABLE EFFECTS</b>                                 | <b>Trivial</b>         | Small       | Moderate        | Large         |  | Varies | Don't know                 |
| <b>UNDESIRABLE EFFECTS</b>                               | <b>Large</b>           | Moderate    | Small           | Trivial       |  | Varies | Don't know                 |
| <b>CERTAINTY OF THE EVIDENCE OF TEST ACCURACY</b>        | Very low               | Low         | <b>Moderate</b> | High          |  |        | No included studies        |
| <b>CERTAINTY OF THE EVIDENCE OF TEST'S EFFECTS</b>       | Very low               | Low         | Moderate        | High          |  |        | <b>No included studies</b> |
| <b>CERTAINTY OF THE EVIDENCE OF MANAGEMENT'S EFFECTS</b> | Very low               | Low         | Moderate        | High          |  |        | <b>No included studies</b> |
| <b>CERTAINTY OF THE</b>                                  | Very low               | Low         | Moderate        | High          |  |        | <b>No included</b>         |

|                                             | JUDGEMENT                            |                                               |                                                          |                                         |                         |               |                            |
|---------------------------------------------|--------------------------------------|-----------------------------------------------|----------------------------------------------------------|-----------------------------------------|-------------------------|---------------|----------------------------|
| EVIDENCE OF TEST RESULT/MANAGEMENT          |                                      |                                               |                                                          |                                         |                         |               | <b>studies</b>             |
| CERTAINTY OF EFFECTS                        | Very low                             | <b>Low</b>                                    | Moderate                                                 | High                                    |                         |               | No included studies        |
| VALUES                                      | Important uncertainty or variability | Possibly important uncertainty or variability | <b>Probably no important uncertainty or variability</b>  | No important uncertainty or variability |                         |               |                            |
| BALANCE OF EFFECTS                          | Favors the comparison                | <b>Probably favors the comparison</b>         | Does not favor either the intervention or the comparison | Probably favors the intervention        | Favors the intervention | Varies        | Don't know                 |
| RESOURCES REQUIRED                          | Large costs                          | <b>Moderate costs</b>                         | Negligible costs and savings                             | Moderate savings                        | Large savings           | Varies        | Don't know                 |
| CERTAINTY OF EVIDENCE OF REQUIRED RESOURCES | Very low                             | Low                                           | Moderate                                                 | High                                    |                         |               | <b>No included studies</b> |
| COST EFFECTIVENESS                          | Favors the comparison                | <b>Probably favors the comparison</b>         | Does not favor either the intervention or the comparison | Probably favors the intervention        | Favors the intervention | Varies        | No included studies        |
| EQUITY                                      | Reduced                              | <b>Probably reduced</b>                       | Probably no impact                                       | Probably increased                      | Increased               | Varies        | Don't know                 |
| ACCEPTABILITY                               | No                                   | Probably no                                   | Probably yes                                             | <b>Yes</b>                              |                         | Varies        | Don't know                 |
| FEASIBILITY                                 | No                                   | Probably no                                   | Probably yes                                             | Yes                                     |                         | <b>Varies</b> | Don't know                 |

#### TYPE OF RECOMMENDATION

|                                                            |                                                          |                                                                               |                                                      |                                                 |
|------------------------------------------------------------|----------------------------------------------------------|-------------------------------------------------------------------------------|------------------------------------------------------|-------------------------------------------------|
| <b>Strong recommendation against the intervention</b><br>● | Conditional recommendation against the intervention<br>○ | Conditional recommendation for either the intervention or the comparison<br>○ | Conditional recommendation for the intervention<br>○ | Strong recommendation for the intervention<br>○ |
|------------------------------------------------------------|----------------------------------------------------------|-------------------------------------------------------------------------------|------------------------------------------------------|-------------------------------------------------|

## CONCLUSIONS

### Recommendation

In patients with a high probability of VWD (e.g. affected first degree relative), the panel recommends against using a bleeding assessment tool (BAT) as an initial screening test to decide if specific blood testing is warranted, and rather performing specific blood testing in conjunction with the administration of a BAT for the diagnosis of VWD.

(Strong recommendation based on moderate certainty in the evidence)

### Remarks:

- This recommendation addresses patients with a high VWD pretest probability (~50%) corresponding to those typically referred for hematology evaluation because of an affected first degree relative regardless of their bleeding symptoms or initial laboratory tests (including the pediatric population).
- Beyond their utility as a screening test in the primary care setting, BATs can be used in the referral setting to assess and document the severity of bleeding
- Specific blood testing for VWD refers to VWF:Ag, VWF activity and FVIII:C.

### Justification

The guideline panel determined that there is moderate certainty in the evidence for a net health harm from using BAT as the sole triage to determine who undergoes diagnostic testing versus blood testing in patients suspected of VWD because of a first relative with VWD. Other EtD criteria were generally against using BATs so that the undesirable consequences were greater than the desirable consequences.

### Subgroup considerations

### Implementation considerations

### Monitoring and evaluation



## Research priorities

- Studies regarding pediatric use of BATs.
- Studies regarding BATs use in adolescent males and females.

## APPENDIX

### 1. Risk of Bias:

| Author           | Year | Patient Selection Risk of bias | Index test Risk of bias | Reference test Risk of bias | Flow and timing Risk of bias |
|------------------|------|--------------------------------|-------------------------|-----------------------------|------------------------------|
| Bowman, M.       | 2008 | Low                            | Low                     | Low                         | Low                          |
| Bowman, M.       | 2009 | Low                            | Low                     | Low                         | Low                          |
| Deforest, M.     | 2015 | Low                            | Low                     | Low                         | Low                          |
| Malec, L. M.     | 2016 | Low                            | Low                     | Low                         | Low                          |
| Marcus, P. D     | 2011 | Low                            | Low                     | Low                         | Low                          |
| Bidlingmaier, C. | 2012 | Low                            | Low                     | Low                         | Low                          |
| Philipp, C. S.   | 2008 | Moderate                       | Moderate                | Low                         | Low                          |
| Faiz, A.         | 2017 | High                           | Low                     | Moderate                    | Low                          |
| Belen, B.        | 2015 | High                           | Low                     | Low                         | Low                          |
| Mittal, N.       | 2015 | High                           | Moderate                | High                        | Low                          |
| Pathare, A.      | 2018 | High                           | Moderate                | Low                         | Low                          |
| Bujnicki, H. C.  | 2011 | High                           | Moderate                | High                        | Low                          |
| Rodeghiero, F.   | 2005 | High                           | Moderate                | Moderate                    | Low                          |

### 2. Test Accuracy Results

| ID  | Author           | Year | Study Design            | Number of patients | TP | FN | FP  | TN   | Sens  | Low CI | Up CI | Spec  | Low CI | Up CI | Prevalence |
|-----|------------------|------|-------------------------|--------------------|----|----|-----|------|-------|--------|-------|-------|--------|-------|------------|
| 629 | Bidlingmaier, C. | 2012 | Cohort with DTA results | 100                | 18 | 5  | 11  | 66   | 0.783 | 0.572  | 0.907 | 0.857 | 0.76   | 0.919 | 23%        |
| 795 | Bowman, M.       | 2008 | Cohort with DTA results | 217                | 7  | 0  | 28  | 182  | 0.937 | 0.461  | 0.996 | 0.865 | 0.812  | 0.905 | 3%         |
| 620 | Bowman, M.       | 2009 | Cohort with DTA results | 151                | 5  | 1  | 31  | 114  | 0.833 | 0.369  | 0.977 | 0.786 | 0.712  | 0.845 | 3%         |
| 488 | Deforest, M.     | 2015 | Cohort with DTA results | 64                 | 7  | 2  | 40  | 15   | 0.778 | 0.421  | 0.944 | 0.273 | 0.172  | 0.404 | 14%        |
| 446 | Malec, L. M.     | 2016 | Cohort with DTA results | 193                | 32 | 15 | 96  | 50   | 0.681 | 0.536  | 0.798 | 0.342 | 0.27   | 0.423 | 22%        |
| 681 | Marcus, P. D     | 2011 | Cohort with DTA results | 104                | 7  | 1  | 67  | 29   | 0.875 | 0.463  | 0.983 | 0.302 | 0.219  | 0.401 | 8%         |
| 135 | Philipp, C. S.   | 2008 | Cohort with DTA results | 146                | 10 | 2  | 107 | 27   | 0.833 | 0.523  | 0.958 | 0.201 | 0.142  | 0.278 | 8%         |
| 146 | Faiz, A.         | 2017 | Case Control            | 53                 | 21 | 5  | 19  | 8    | 0.808 | 0.613  | 0.918 | 0.296 | 0.156  | 0.49  | 27%        |
| 407 | Belen, B.        | 2015 | Case Control            | 84                 | 46 | 0  | 15  | 17   | 0.989 | 0.851  | 0.999 | 0.53  | 0.363  | 0.691 | 25%        |
| 710 | Mittal, N.       | 2015 | Case Control            | 1316               | 34 | 1  | 36  | 1245 | 0.971 | 0.823  | 0.996 | 0.972 | 0.961  | 0.98  | 3%         |
| 673 | Pathare, A.      | 2018 | Case Control            | 96                 | 33 | 13 | 8   | 42   | 0.717 | 0.572  | 0.828 | 0.84  | 0.711  | 0.918 | 48%        |
| 585 | Bujnicki, H. C.  | 2011 | Case control            | 160                | 75 | 5  | 4   | 76   | 0.937 | 0.858  | 0.974 | 0.95  | 0.874  | 0.981 | 50%        |
| 260 | Rodeghiero, F.   | 2005 | Case Control            | 341                | 81 | 2  | 45  | 213  | 0.976 | 0.909  | 0.994 | 0.826 | 0.774  | 0.867 | 25%        |

| Studies                                      | Estimate (95% C.I.)         | TP/(TP + FN)  |
|----------------------------------------------|-----------------------------|---------------|
| Bowman, M. (C, MCMDM-1) 2008                 | 0.938 (0.461, 0.996)        | 7/7           |
| Bowman, M., (C, PBQ) 2009                    | 0.833 (0.369, 0.977)        | 5/6           |
| Deforest, M., A., (C, Self BAT) 2015         | 0.778 (0.421, 0.944)        | 7/9           |
| Malec, L. M., (C, Composite score) 2016      | 0.681 (0.536, 0.798)        | 32/47         |
| Marcus, P. D., (C, Modified Vicenza) 2011    | 0.875 (0.463, 0.983)        | 7/8           |
| Philipp, C. S. (C, Questionnaire) 2008       | 0.833 (0.523, 0.958)        | 10/12         |
| Bidlingmaier, C. (C, ISTH Child BS) 2012     | 0.783 (0.572, 0.907)        | 18/23         |
| <b>Overall (I<sup>2</sup>=0 % , P=0.698)</b> | <b>0.752 (0.661, 0.826)</b> | <b>86/112</b> |



| Studies                                             | Estimate (95% C.I.)         | TN/(FP + TN)   |
|-----------------------------------------------------|-----------------------------|----------------|
| Bowman, M. (C, MCMDM-1) 2008                        | 0.865 (0.812, 0.905)        | 182/210        |
| Bowman, M., (C, PBQ) 2009                           | 0.786 (0.712, 0.845)        | 114/145        |
| Deforest, M., A., (C, Self BAT) 2015                | 0.273 (0.172, 0.404)        | 15/55          |
| Malec, L. M., (C, Composite score) 2016             | 0.342 (0.270, 0.423)        | 50/146         |
| Marcus, P. D., (C, Modified Vicenza) 2011           | 0.302 (0.219, 0.401)        | 29/96          |
| Philipp, C. S. (C, Questionnaire) 2008              | 0.201 (0.142, 0.278)        | 27/134         |
| Bidlingmaier, C. (C, ISTH Child BS) 2012            | 0.857 (0.760, 0.919)        | 66/77          |
| <b>Overall (I<sup>2</sup>=9744 % , P&lt; 0.001)</b> | <b>0.539 (0.293, 0.767)</b> | <b>483/863</b> |

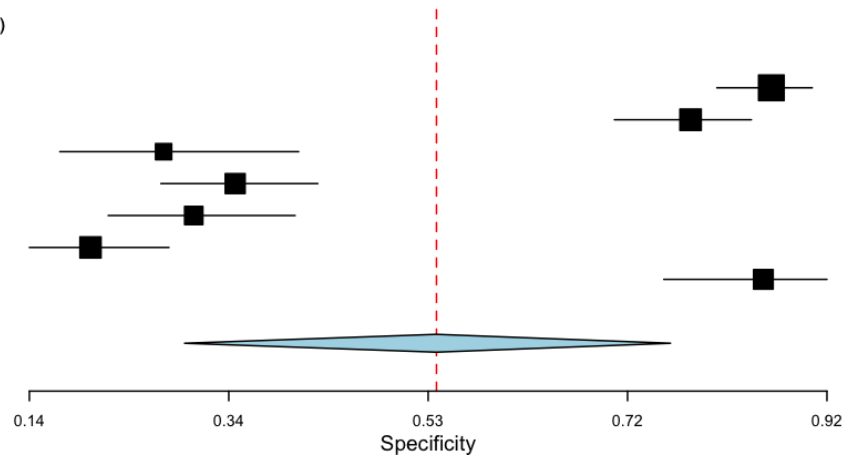

### 3. Outcomes:

- For overall population
  - Evidence profile:

|             |                             |
|-------------|-----------------------------|
| Sensitivity | 0.75 (95% CI: 0.66 to 0.83) |
| Specificity | 0.54 (95% CI: 0.29 to 0.77) |

|             |    |     |     |
|-------------|----|-----|-----|
| Prevalences | 3% | 20% | 50% |
|-------------|----|-----|-----|

| Outcome | No of | Study | Factors that may decrease certainty of evidence | Effect per 1,000 patients tested | Test |
|---------|-------|-------|-------------------------------------------------|----------------------------------|------|
|---------|-------|-------|-------------------------------------------------|----------------------------------|------|

|                                                                                              | studies<br>(No of patients) | design                                          | Risk of bias | Indirectness | Inconsistency        | Imprecision | Publication bias | pre-test probability of 3% <sup>b</sup> | pre-test probability of 20% <sup>c</sup> | pre-test probability of 50% <sup>d</sup> | accuracy CoE     |
|----------------------------------------------------------------------------------------------|-----------------------------|-------------------------------------------------|--------------|--------------|----------------------|-------------|------------------|-----------------------------------------|------------------------------------------|------------------------------------------|------------------|
| <b>True positives</b><br>(patients with suspected patients)                                  | 7 studies<br>112 patients   | cross-sectional<br>(cohort type accuracy study) | not serious  | not serious  | not serious          | not serious | none             | 23 (20 to 25)                           | 150 (132 to 165)                         | 376 (331 to 413)                         | ⊕⊕⊕⊕<br>HIGH     |
| <b>False negatives</b><br>(patients incorrectly classified as not having suspected patients) |                             |                                                 |              |              |                      |             |                  | 7 (5 to 10)                             | 50 (35 to 68)                            | 124 (87 to 169)                          |                  |
| <b>True negatives</b><br>(patients without suspected patients)                               | 7 studies<br>863 patients   | cross-sectional<br>(cohort type accuracy study) | not serious  | not serious  | serious <sup>a</sup> | not serious | none             | 523 (284 to 744)                        | 431 (234 to 614)                         | 270 (147 to 384)                         | ⊕⊕⊕○<br>MODERATE |
| <b>False positives</b><br>(patients incorrectly classified as having suspected patients)     |                             |                                                 |              |              |                      |             |                  | 447 (226 to 686)                        | 369 (186 to 566)                         | 230 (116 to 353)                         |                  |

#### Explanations

- The point estimates of specificity are not homogenous which was not explained by the setting or risk of bias a priori .
- Typically seen in patients investigated for VWD because of a personal history of abnormal laboratory test (e.g., increased PTT).
- Typically seen in patients investigated for VWD because of a personal history of bleeding symptoms (e.g., mucocutaneous bleeding). - Quiroga, 2007.
- Typically seen in in patients investigated for VWD as a first degree relative for a patient with VWD.

- For a pre-test probability of 3%, which is typically seen in patients investigated for VWD because of a personal history of abnormal laboratory test (e.g., increased PTT):

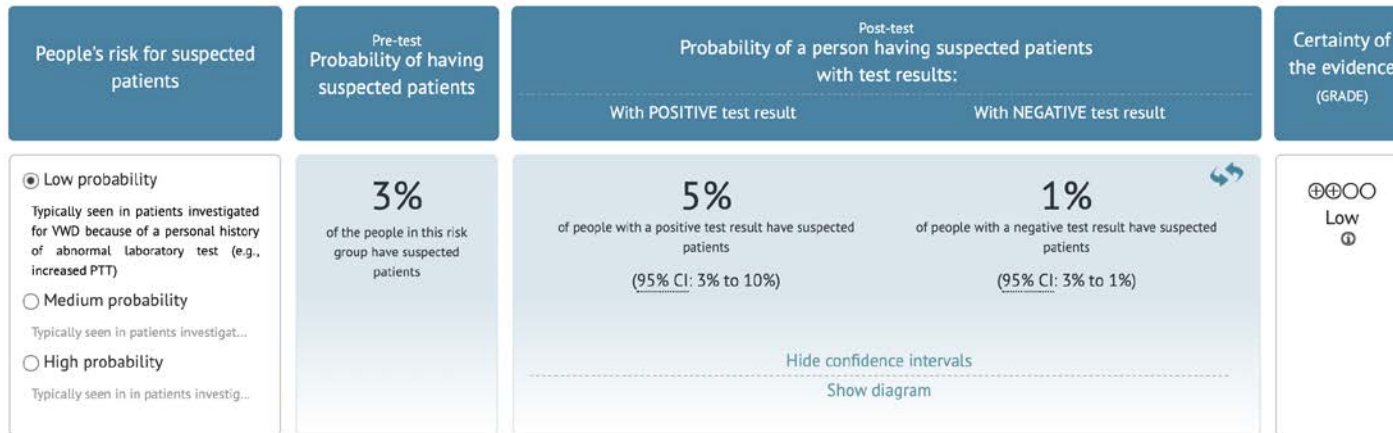

- . Out of 100 people with a positive BAT, **5** would actually have VWD and **95** would not have VWD
- . Out of 100 people with a negative BAT, **1** would actually have VWD and **99** would not have VWD

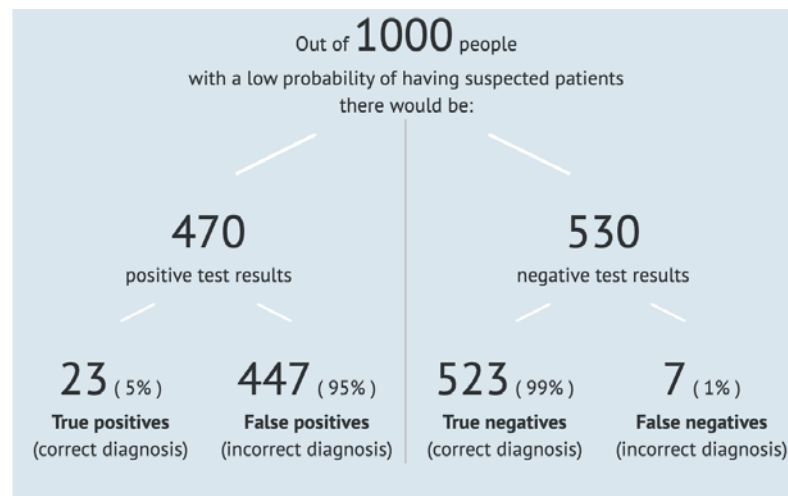



- . 470 out of 1000 people tested with BAT will have a "positive" test result: 23 of these will have VWD (true positive), However, 447 of these people will not have VWD, even though their test result was positive (false positive).
- . 530 out of 1000 people tested with BAT will have a "negative" test result. 523 of these will not have VWD (true negative). However, 7 of these people will actually have VWD, even though their test result was negative (false negative).



- . 30 people (out of 1000 people in the Low probability group) have (as yet undetected) VWD. Of the 1000 people who take Bleeding Assessment tool test: 23 people will be correctly identified as having VWD (true positives). However, 7 people with VWD will remain undetected; their "negative" BAT results will be incorrect (false negatives).
- . 970 people (out of 1000 people in the Low probability group) do not have VWD. Of the 1000 people who take the Bleeding Assessment tool test: 523 of these people will be correctly identified as not having VWD (true negatives). However, 447 people will be incorrectly identified; their "positive" test results will suggest they have VWD (false positives).

- For the pre-test probability of 20%, which is typically seen in patients investigated for VWD because of a personal history of bleeding symptoms (e.g., mucocutaneous bleeding), and the pre-test probability of 50%, which is typically seen in in patients investigated for VWD as a first degree relative for a patient with VWD, the interactive summary of findings can be accessed using the following link:

[https://gdt.gradeapro.org/presentations/#/isof/isof\\_c5b33e22-a646-4654-9f09-b820aff36c5c-1569520689536? k=eump67](https://gdt.gradeapro.org/presentations/#/isof/isof_c5b33e22-a646-4654-9f09-b820aff36c5c-1569520689536? k=eump67)

## References:

1. Pathare A, Al Hajri, F., Al Omrani, S., Al Obaidani, N., Al Balushi, B., Al Falahi, K. Bleeding score in type 1 von Willebrand disease patients using the condensed MCMDM-1 vWD validated questionnaire. *International Journal of Laboratory Hematology*. 2018;40(5):515-520.
2. A. S. K. Faiz A, Guo, S., Murphy, S., Philipp, C. S. Screening of female family members of von Willebrand disease patients: utility of a modified screening tool in a high-risk population. *Haemophilia* 2017;23(5):736-742.
3. Malec LM, Moore, C. G., Bennett, C. M., Yee, D. L., Kerlin, B. A., Witmer, C. M., Kulkarni, R., Gupta, S., Gunawardena, S., Kouides, P. A., Brown, D., Ragni, M. V. Validation study of the composite score to identify von Willebrand disease in children. *Journal of Pediatric Hematology/Oncology*. 2016;38(2):139-140.
4. Mittal N, Naridze, R., James, P., Shott, S., Valentino, L. A. Utility of a Paediatric Bleeding Questionnaire as a screening tool for von Willebrand disease in apparently healthy children. *Haemophilia*. 2015;21(6):806-811.
5. Deforest M, Grabell, J., Albert, S., Young, J., Tuttle, A., Hopman, W. M., James, P. D. Generation and optimization of the self-administered bleeding assessment tool and its validation as a screening test for von Willebrand disease. *Haemophilia*. 2015;21(5):e384-e388.
6. Belen B, Kocak, U., Isik, M., Keskin, E. Y., Oner, N., Sal, E., Kaya, Z., Yenicesu, I., Gursel, T. Evaluation of Pediatric Bleeding Questionnaire in Turkish Children with von Willebrand Disease and Platelet Function Disorders. *Clinical and Applied Thrombosis/Hemostasis*. 2015;21(6):565-569.
7. Bidlingmaier C, Grote, V., Budde, U., Olivieri, M., Kurnik, K. Prospective evaluation of a pediatric bleeding questionnaire and the ISTH bleeding assessment tool in children and parents in routine clinical practice. *Journal of Thrombosis and Haemostasis*. 2012;10(7):1335-1341.
8. Marcus PD, Nire, K. G., Grooms, L., Klima, J., O'Brien S, H. The power of a standardized bleeding score in diagnosing paediatric type 1 von Willebrand's disease and platelet function defects. *Haemophilia*. 2011;17(2):223-227.
9. Bujnicki HC, Sidonio, R. F., Kempton, C., Kouides, P. A., Kulkarni, R., Nugent, D. J., Yee, D. L., Moore, C. G., Ragni, M. V. Screening for von Willebrand disease in children: a case-control study. *J Thromb Haemost*. 2011;9(5):1086-1089.
10. Bowman M, Riddel, J., Rand, M. L., Tosetto, A., Silva, M., James, P. D. Evaluation of the diagnostic utility for von Willebrand disease of a pediatric bleeding questionnaire. *Journal of Thrombosis and Haemostasis*. 2009;7(8):1418-1421.
11. Tosetto A, Castaman, G., Rodeghiero, F. Evidence-based diagnosis of type 1 von Willebrand disease: A Bayes theorem approach. *Blood*. 2008;111(8):3998-4003.
12. Philipp CS, Faiz, A., Dowling, N. F., Beckman, M., Owens, S., Ayers, C., Bachmann, G. Development of a screening tool for identifying women with menorrhagia for hemostatic evaluation. *American Journal of Obstetrics and Gynecology*. 2008;198(2):163.e161-163.e168.
13. Bowman M, Mundell, G., Grabell, J., Hopman, W. M., Rapson, D., Lillicrap, D., James, P. Generation and validation of the Condensed MCMDM-1VWD Bleeding Questionnaire for von Willebrand disease. *Journal of Thrombosis and Haemostasis*. 2008;6(12):2062-2066.
14. Tosetto A, Rodeghiero, F., Castaman, G., Goodeve, A., Federici, A. B., Batlle, J., Meyer, D., Fressinaud, E., Mazurier, C., Goudemand, J., Eikenboom, J., Schneppenheim, R., Budde, U., Ingerslev, J., Vorlova, Z., Habart, D., Holmberg, L., Lethagen, S., Pasi, J., Hill, F., Peake, I. A quantitative analysis of bleeding symptoms in type 1 von Willebrand disease: Results from a multicenter European study (MCMDM-1 VWD). *Journal of Thrombosis and Haemostasis*. 2006;4(4):766-773.
15. Rodeghiero F, Castaman, G., Tosetto, A., Batlle, J., Baudo, F., Cappelletti, A., Casana, P., De Bosch, N., Eikenboom, J. C., Federici, A. B., Lethagen, S., Linari, S., Srivastava, A. The discriminant power of bleeding history for the diagnosis of type 1 von Willebrand disease: an international, multicenter study.[Erratum appears in *J Thromb Haemost*. 2006 Apr;4(4):925]. *J Thromb Haemost*. 2005;3(12):2619-2626.



### Question 3

Should newer tests of platelet binding activity of VWF function (VWF:GplbR , VWF:GplbM) vs. VWF:RCo be used to diagnose von Willebrand Disease in patients suspected of VWD?

**POPULATION:** Patients suspected of von Willebrand Disease (VWD)

**INTERVENTION:** Newer tests (VWF:GplbR , VWF:GplbM)

**COMPARISON:** VWF:RCo

**PURPOSE OF THE TEST:** Identify patients with VWD

**ROLE OF THE TEST:** Identify patients with VWD

**LINKED TREATMENTS:** Desmopressin, Tranexamic acid, Factor replacement

**ANTICIPATED OUTCOMES:** VWF:RCo – False positive, VWF:RCo – False negative, VWF:RCo – True positive, VWF:RCo – True negative Major bleeding, transfusion and treatment, blood loss, gastrointestinal bleeding, symptom severity, minor bleeding, mortality.

**SETTING:** Outpatient

**PERSPECTIVE:** Clinical recommendation – population perspective

**BACKGROUND:** Von Willebrand disease (VWD) is the most common inherited bleeding disorder known in humans: while estimated to affect between 0.1 and 1% of the general population, many are never diagnosed. VWD diagnosis and classification require numerous laboratory tests (Pathare, 2018). Diagnosis and classification of VWD require correlation between clinical findings and laboratory results. Recommended initial laboratory tests include measurements of plasma VWF antigen (VWF:Ag), VWF-platelet GP Ib binding activity (e.g. VWF:RCo) and FVIII:C (Chenn, 2011, Favalaro, 2016). Automated methods of measuring VWF activity are becoming widely used, and have advantages and limitations (Kessler, 2017, Higgins, 2018,).

**SUBGROUPS:**

**CONFLICT OF INTERESTS:** ASH conflict of interest declaration and management policies were applied, and the following panel members were voting panel members (determining the direction and strength of the recommendation): Sandra Haberichter, Jeroen Eikenboom, Barbara Konkle, Robert Sidonio Jr, Simon McRae, James O'Donnell, Claire McLintock, Barbara Ameer, Nicolas Giraud, Nikole Scappe, Vicki Jacobs-Pratt, Paula James, Nathan Connell.

Robert Montgomery was recused as a result of risk of conflicts of interest.

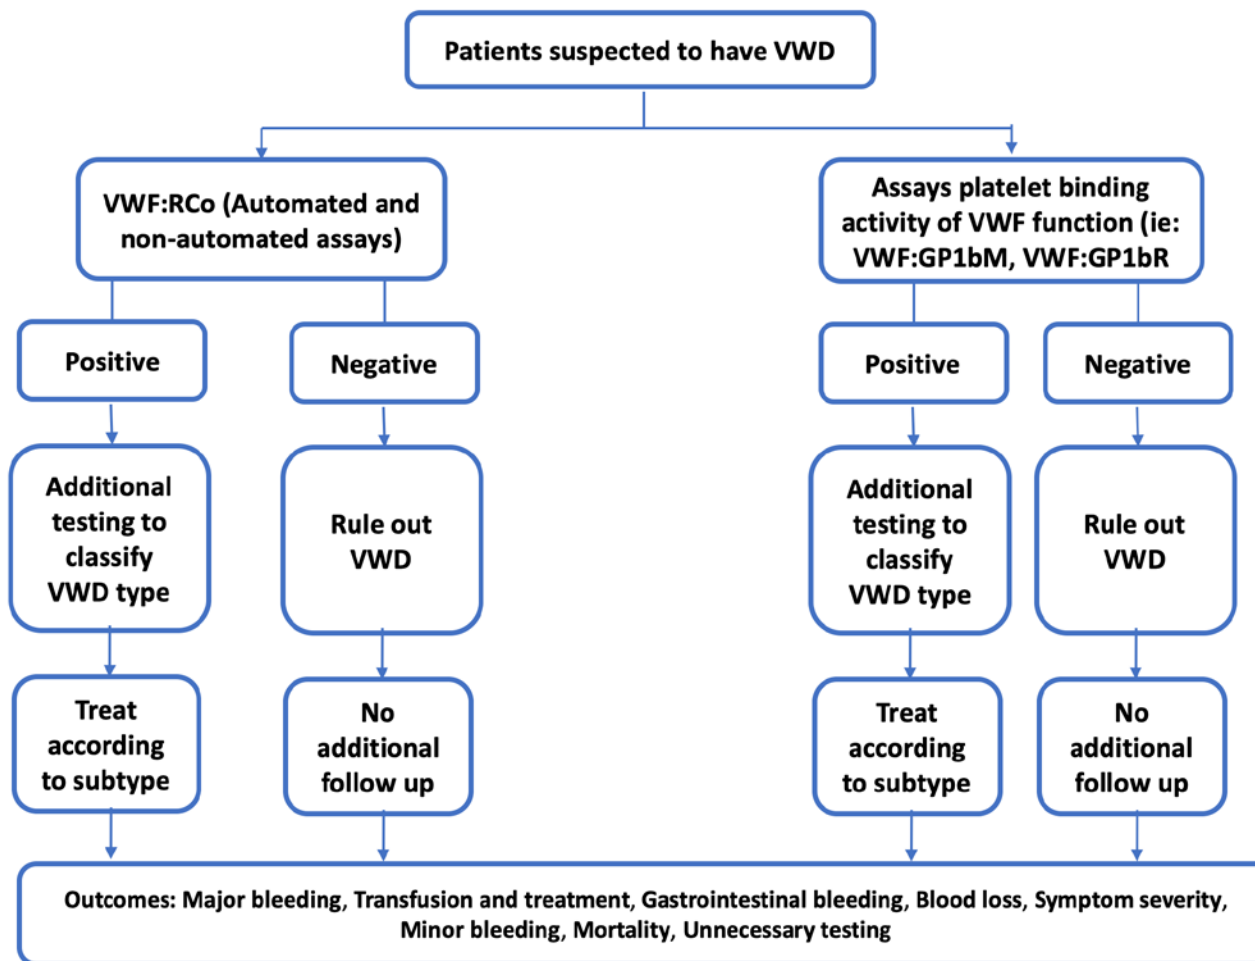

## ASSESSMENT

| Problem<br>Is the problem a priority?                                                             |                                                                                                                                                                                                                                                                                                                                                                                                                                                    |                                                                                                                 |
|---------------------------------------------------------------------------------------------------|----------------------------------------------------------------------------------------------------------------------------------------------------------------------------------------------------------------------------------------------------------------------------------------------------------------------------------------------------------------------------------------------------------------------------------------------------|-----------------------------------------------------------------------------------------------------------------|
| JUDGEMENT                                                                                         | RESEARCH EVIDENCE                                                                                                                                                                                                                                                                                                                                                                                                                                  | ADDITIONAL CONSIDERATIONS                                                                                       |
| <ul style="list-style-type: none"> <li>○ No</li> <li>○ Probably no</li> <li>○ Probably</li> </ul> | <p>Von Willebrand disease (VWD) is the most common inherited bleeding disorder known in humans: while estimated to affect between 0.1 and 1% of the general population, many are never diagnosed. VWD diagnosis and classification require numerous laboratory tests (Pathare, 2018). Diagnosis and classification of VWD require a correlation between clinical findings and laboratory results. Recommended initial laboratory tests include</p> | <p>This question was judged to be a priority among many candidate questions to address in these guidelines.</p> |

|                                          |                                                                                                                            |  |
|------------------------------------------|----------------------------------------------------------------------------------------------------------------------------|--|
| yes<br>● Yes<br>○ Varies<br>○ Don't know | measurements of plasma VWF antigen (VWF:Ag), VWF-platelet GP Ib binding activity (e.g. VWF:RCo) and FVIII:C (Chenn, 2011). |  |
|------------------------------------------|----------------------------------------------------------------------------------------------------------------------------|--|

**Test accuracy**  
How accurate is the test?

| JUDGEMENT | RESEARCH EVIDENCE | ADDITIONAL CONSIDERATIONS |
|-----------|-------------------|---------------------------|
|-----------|-------------------|---------------------------|

|                                                                                                |                                                                                                                                                                                                                                                                                                                                                                                                                                                                                                                                                                                                                                                                                                                                                                                                                                      |                                                                                                                                                                                                                                                                                                                                                                                                                                                     |
|------------------------------------------------------------------------------------------------|--------------------------------------------------------------------------------------------------------------------------------------------------------------------------------------------------------------------------------------------------------------------------------------------------------------------------------------------------------------------------------------------------------------------------------------------------------------------------------------------------------------------------------------------------------------------------------------------------------------------------------------------------------------------------------------------------------------------------------------------------------------------------------------------------------------------------------------|-----------------------------------------------------------------------------------------------------------------------------------------------------------------------------------------------------------------------------------------------------------------------------------------------------------------------------------------------------------------------------------------------------------------------------------------------------|
| ○ Very inaccurate<br>○ Inaccurate<br>● Accurate<br>○ Very accurate<br>○ Varies<br>○ Don't know | <p>VWF:RCO:<br/>         - the range of sensitivities across 4 studies* with 337 patients: 0.83 to 1.00<br/>         - the range of specificities across 4 studies* with 587 patients: 0.87 to 0.95</p> <p>VWF:GplbR:<br/>         - the range of sensitivities across 4 studies* with 404 patients: 0.80 to 1.00<br/>         - the range of specificities across 4 studies* with 575 patients: 0.81 to 0.97</p> <p>VWF:GplbM:<br/>         - the range of sensitivities across 2 studies with 249 patients: 0.62 to 0.82<br/>         - the range of specificities across 2 studies with 513 patients: 0.90 to 0.97</p> <p>* Three of the four studies (Boender (2018), Vangenechten (2018) and Sagheer (2016)) investigated test accuracy for classifying Type 2 VWD patients (using a ratio of 0.6), not for diagnosing VWD.</p> | Based on available diagnostic test accuracy, there appear to be comparable results between the different assays, however, there is concern about using assays in specific populations, which might affect the accuracy of this assay, such as the use of VWF:RCo in patients with D1472H variant (present in 67% of African American patients with low VWF, and 17% of Caucasians). The included studies do not include a large African population. |
|------------------------------------------------------------------------------------------------|--------------------------------------------------------------------------------------------------------------------------------------------------------------------------------------------------------------------------------------------------------------------------------------------------------------------------------------------------------------------------------------------------------------------------------------------------------------------------------------------------------------------------------------------------------------------------------------------------------------------------------------------------------------------------------------------------------------------------------------------------------------------------------------------------------------------------------------|-----------------------------------------------------------------------------------------------------------------------------------------------------------------------------------------------------------------------------------------------------------------------------------------------------------------------------------------------------------------------------------------------------------------------------------------------------|

| Test result                                                                          | Number of results per 1000 patients tested (95% CI)          |          |                                                             |            |                                                               |            | No of participants (studies) | Certainty of the evidence (GRADE) |
|--------------------------------------------------------------------------------------|--------------------------------------------------------------|----------|-------------------------------------------------------------|------------|---------------------------------------------------------------|------------|------------------------------|-----------------------------------|
|                                                                                      | Prevalence 3%                                                |          | Prevalence 20%                                              |            | Prevalence 50%                                                |            |                              |                                   |
|                                                                                      | Newer tests (VWF:GplbR , VWF:GplbM)                          | VWF:RCo  | Newer tests (VWF:GplbR , VWF:GplbM)                         | VWF:RCo    | Newer tests (VWF:GplbR , VWF:GplbM)                           | VWF:RCo    |                              |                                   |
| True positives patients with Von Willebrand Disease                                  | 24 to 30                                                     | 25 to 30 | 160 to 200                                                  | 166 to 200 | 400 to 500                                                    | 415 to 500 | 404 (4)                      | ⊕⊕○○<br>LOW <sup>a,b</sup>        |
|                                                                                      | 1 fewer to 0 fewer TP in Newer tests (VWF:GplbR , VWF:GplbM) |          | 6 fewer to 0 fewer TP in Newer tests (VWF:GplR , VWF:GplbM) |            | 15 fewer to 0 fewer TP in Newer tests (VWF:GplbR , VWF:GplbM) |            |                              |                                   |
| False negatives patients incorrectly classified as not having Von Willebrand Disease | 0 to 6                                                       | 0 to 5   | 0 to 40                                                     | 0 to 34    | 0 to 100                                                      | 0 to 85    |                              |                                   |
|                                                                                      | 1 more to 0 fewer FN in Newer tests (VWF:GplbR , VWF:GplbM)  |          | 6 more to 0 fewer FN in Newer tests (VWF:GplbR , VWF:GplbM) |            | 15 more to 0 fewer FN in Newer tests (VWF:GplbR , VWF:GplbM)  |            |                              |                                   |

the question becomes important when the patient has borderline levels, however, the studies included patients from the entire range of VWF making the borderline factor levels not an issue in the evidence. Additionally, the

|                                                                                  |                                                              |            |                                                              |            |                                                              |            |         |                                   |
|----------------------------------------------------------------------------------|--------------------------------------------------------------|------------|--------------------------------------------------------------|------------|--------------------------------------------------------------|------------|---------|-----------------------------------|
| True negatives patients without Von Willebrand Disease                           | 786 to 941                                                   | 844 to 922 | 648 to 776                                                   | 696 to 760 | 405 to 485                                                   | 435 to 475 | 584 (4) | ⊕○○○<br>VERY LOW <sup>a,b,c</sup> |
|                                                                                  | 58 fewer to 19 more TN in Newer tests (VWF:GPIbR, VWF:GPIbM) |            | 48 fewer to 16 more TN in Newer tests (VWF:GPIbR, VWF:GPIbM) |            | 30 fewer to 10 more TN in Newer tests (VWF:GPIbR, VWF:GPIbM) |            |         |                                   |
| False positives patients incorrectly classified as having Von Willebrand Disease | 29 to 184                                                    | 48 to 126  | 24 to 152                                                    | 40 to 104  | 15 to 95                                                     | 25 to 65   |         |                                   |
|                                                                                  | 58 more to 19 fewer FP in Newer tests (VWF:GPIbR, VWF:GPIbM) |            | 48 more to 16 fewer FP in Newer tests (VWF:GPIbR, VWF:GPIbM) |            | 30 more to 10 fewer FP in Newer tests (VWF:GPIbR, VWF:GPIbM) |            |         |                                   |

newer assays overcome the inaccuracy of the levels tested with VWF:RCo when the levels are low.

- Serious patient selection risk of bias due to case-control design
- Studies do not include a considerable number of African American patients, and therefore do not consider the D1472H variant.
- Considering the extremes of the confidence interval may lead to a different decision about which test to use

| Author        | Year | Pts | Test 1       | Test 2       | Test 3       | Cor 1-2 | Cor 2-3 | Cor 1-3 |
|---------------|------|-----|--------------|--------------|--------------|---------|---------|---------|
| Boender, J    | 2018 | 618 | BC-VWF:Rco   | VWF:GPIbR    | VWF:GPIbM    | 0.957   | 0.984   | 0.959   |
| Szederjesi A  | 2018 | 95  | BC-VWF:Rco   | VWF:GPIbR    | VWF:GPIbM    | 0.963   |         | 0.989   |
| Sagheer, S    | 2016 | 60  | VWF:RCo[Agg] | VWF:GPIbR    | VWF:Ab       | 0.954   |         | 0.938   |
| Favaloro E    | 2016 | 535 | VWF:RCo[Agg] | VWF:GPIbR    | VWF:GPIbM    | 0.928   |         | 0.942   |
| Timm A        | 2015 | 170 | BC-VWF:Rco   | VWF:GPIbR    | VWF:GPIbM    | 0.927   | 0.921   | 0.912   |
| Stitt C       | 2014 | 37  | BC-VWF:Rco   | VWF:GPIbM    |              | 0.989   |         |         |
| Patzke, J     | 2014 | 580 | BC-VWF:Rco   | VWF:GPIbM    |              | 0.99    |         |         |
| Geisen, U     | 2014 | 432 | BC-VWF:Rco   | VWF:GPIbM    |              | 0.96    |         |         |
| Favaloro, E   | 2014 | 600 | BC-VWF:Rco   | VWF:GPIbM    |              | 0.958   |         |         |
| De Maistre    | 2014 | 122 | VWF:RCo[Agg] | VWF:RCo[Acu] | VWF:GPIbM    | 0.977   |         | 0.965   |
| Costa Pinto   | 2014 | 176 | VWF:RCo[Agg] | VWF:RCo[Acu] |              | 0.92    |         |         |
| Verfaillie, C | 2013 | 50  | VWF:GPIbR    | VWF:Ab       | VWF:RCo[Agg] | 0.94    |         | 0.77    |
| Lawrie, A     | 2013 | 180 | BC-VWF:RCo   | VWF:GPIbM    |              | 0.97    |         |         |
| Cabrera, N    | 2013 | 91  | VWF:RCo[Agg] | VWF:GPIbR    |              | 0.92    |         |         |
| Trossaert, M  | 2011 | 268 | VWF:Ab       | BC-VWF:Rco   |              | 0.89    |         |         |
| Chen, D       | 2011 | 468 | BC-VWF:Rco   | VWF:Ab       |              | 0.93    |         |         |

|                  |      |     |               |                    |  |       |  |  |
|------------------|------|-----|---------------|--------------------|--|-------|--|--|
| Bowyer, A        | 2011 | 53  | VWF:RCo[Agg]  | BC-VWF:Rco         |  | 0.91  |  |  |
| Chen, D          | 2008 | 35  | VWF:Rco [Agg] | VWF:Rco (Flow Cyt) |  | 0.86  |  |  |
| Pinol, M         | 2007 | 127 | VWF:Rco [Agg] | VWF:Ab             |  | 0.956 |  |  |
| Vleeschauwer, A  | 2006 | 148 | VWF:Rco [Agg] | VWF:Ab             |  | 0.84  |  |  |
| Sucker, C        | 2006 | 300 | VWF:Ab        | BC-VWF:Rco         |  | 0.88  |  |  |
| Strandberg, K    | 2006 | 478 | VWF:Rco [Agg] | BC-VWF:Rco         |  | 0.96  |  |  |
| Vanhoorelbeke, K | 2005 | 92  | VWF:Rco [Agg] | VWF:RCo ELISA      |  | 0.963 |  |  |
| Lattuada, A      | 2004 | 95  | VWF:Rco [Agg] | BC-VWF:Rco         |  | 0.61  |  |  |
| Federici, A      | 2004 | 122 | VWF:Rco [Agg] | VWF:RCo ELISA      |  | 0.93  |  |  |

### Desirable Effects

How substantial are the desirable anticipated effects?

| JUDGEMENT                                                                                                                                                 | RESEARCH EVIDENCE                                                                                                                                                                                                                                                                                                                                                                                                                                                                                                                                                                                                                                                                                                                                                                                                                                                                                                                                                                              | ADDITIONAL CONSIDERATIONS |
|-----------------------------------------------------------------------------------------------------------------------------------------------------------|------------------------------------------------------------------------------------------------------------------------------------------------------------------------------------------------------------------------------------------------------------------------------------------------------------------------------------------------------------------------------------------------------------------------------------------------------------------------------------------------------------------------------------------------------------------------------------------------------------------------------------------------------------------------------------------------------------------------------------------------------------------------------------------------------------------------------------------------------------------------------------------------------------------------------------------------------------------------------------------------|---------------------------|
| <ul style="list-style-type: none"> <li>○ Trivial</li> <li>○ Small</li> <li>● Moderate</li> <li>○ Large</li> <li>○ Varies</li> <li>○ Don't know</li> </ul> | <p><b>True Positive:</b> These are patients who have VWD and who received preventive and appropriate treatment. They benefit from decreasing the risk of bleeding with treatment and they suffer the side effects of treatment.</p> <p><b>True Negative:</b> These are patients who did not have VWD and who were correctly identified as not having the disease. They will appropriately not receive treatment for VWD and not suffer the side effects of treatment.</p> <p><b>False Negative:</b> These are patients who have VWD but the diagnosis was missed and will be sent home without appropriate treatment. They face the risks of prolonged and heavy bleeding due to not receiving treatment.</p> <p><b>False Positive:</b> These are patients who did not have VWD but they will be labeled as having VWD but will be identified as not having VWD on blood testing. They may benefit from the treatment if they have other bleeding disorders, but they suffer side effects.</p> |                           |

### Undesirable Effects

How substantial are the undesirable anticipated effects?

| JUDGEMENT | RESEARCH EVIDENCE | ADDITIONAL CONSIDERATIONS |
|-----------|-------------------|---------------------------|
|           |                   |                           |

|                                                                                                                                                           |                                                                                                                                                                                                                                                                                                                                                                                                                                                                                                                                                                                                                                                                                                                                                                                                                                                                                                                                                                                                |                                                                       |
|-----------------------------------------------------------------------------------------------------------------------------------------------------------|------------------------------------------------------------------------------------------------------------------------------------------------------------------------------------------------------------------------------------------------------------------------------------------------------------------------------------------------------------------------------------------------------------------------------------------------------------------------------------------------------------------------------------------------------------------------------------------------------------------------------------------------------------------------------------------------------------------------------------------------------------------------------------------------------------------------------------------------------------------------------------------------------------------------------------------------------------------------------------------------|-----------------------------------------------------------------------|
| <ul style="list-style-type: none"> <li>○ Large</li> <li>○ Moderate</li> <li>○ Small</li> <li>● Trivial</li> <li>○ Varies</li> <li>○ Don't know</li> </ul> | <p><b>True Positive:</b> These are patients who have VWD and who received preventive and appropriate treatment. They benefit from decreasing the risk of bleeding with treatment and they suffer the side effects of treatment.</p> <p><b>True Negative:</b> These are patients who did not have VWD and who were correctly identified as not having the disease. They will appropriately not receive treatment for VWD and not suffer the side effects of treatment.</p> <p><b>False Negative:</b> These are patients who have VWD but the diagnosis was missed and will be sent home without appropriate treatment. They face the risks of prolonged and heavy bleeding due to not receiving treatment.</p> <p><b>False Positive:</b> These are patients who did not have VWD but they will be labeled as having VWD but will be identified as not having VWD on blood testing. They may benefit from the treatment if they have other bleeding disorders, but they suffer side effects.</p> | <p>Consequences and problems of overdiagnosis and underdiagnosis.</p> |
|-----------------------------------------------------------------------------------------------------------------------------------------------------------|------------------------------------------------------------------------------------------------------------------------------------------------------------------------------------------------------------------------------------------------------------------------------------------------------------------------------------------------------------------------------------------------------------------------------------------------------------------------------------------------------------------------------------------------------------------------------------------------------------------------------------------------------------------------------------------------------------------------------------------------------------------------------------------------------------------------------------------------------------------------------------------------------------------------------------------------------------------------------------------------|-----------------------------------------------------------------------|

**Certainty of the evidence of test accuracy**  
 What is the overall certainty of the evidence of test accuracy?

| JUDGEMENT                                                                                                                                      | RESEARCH EVIDENCE                                                                                                                                                                                                                                                                                                                                                                                                                                                                                                                                                                                                        | ADDITIONAL CONSIDERATIONS |
|------------------------------------------------------------------------------------------------------------------------------------------------|--------------------------------------------------------------------------------------------------------------------------------------------------------------------------------------------------------------------------------------------------------------------------------------------------------------------------------------------------------------------------------------------------------------------------------------------------------------------------------------------------------------------------------------------------------------------------------------------------------------------------|---------------------------|
| <ul style="list-style-type: none"> <li>○ Very low</li> <li>● Low</li> <li>○ Moderate</li> <li>○ High</li> <li>○ No included studies</li> </ul> | <p>The risk of bias assessed using the QUADAS tool is serious, which is due to a serious patient selection risk of bias due to the case-control design used in some of the studies. Additionally, the articles addressed the PICO question indirectly since the diagnostic test accuracy results were used to classify VWD patients in the studies and not for diagnosing VWD. However, the results were precise and consistent between the different studies. This gives an overall low certainty of evidence for sensitivity and specificity in all tests.</p> <p>Refer to the Appendix at the end of the document</p> |                           |

**Certainty of the evidence of test's effects**  
 What is the overall certainty of the evidence for any critical or important direct benefits, adverse effects or burden of the test?

| JUDGEMENT                                                                                                                                      | RESEARCH EVIDENCE                                                                                                                                                                                                                                                                                                                                                                                                                                                                                                                                               | ADDITIONAL CONSIDERATIONS                                                                                                                                                                                                                                                               |
|------------------------------------------------------------------------------------------------------------------------------------------------|-----------------------------------------------------------------------------------------------------------------------------------------------------------------------------------------------------------------------------------------------------------------------------------------------------------------------------------------------------------------------------------------------------------------------------------------------------------------------------------------------------------------------------------------------------------------|-----------------------------------------------------------------------------------------------------------------------------------------------------------------------------------------------------------------------------------------------------------------------------------------|
| <ul style="list-style-type: none"> <li>○ Very low</li> <li>○ Low</li> <li>○ Moderate</li> <li>● High</li> <li>○ No included studies</li> </ul> | <p>Because the VWF:RCo assay depends on ristocetin binding to VWF, variants in the VWF gene may affect the measurement of “VWF activity” by this assay and may not reflect a functional defect or true hemorrhagic risk (Flood, 2010). Reliance on VWF:RCo alone for diagnostic purposes may be an error in those with p.D1472H (Christopherson, 2019). Type 1 VWD subjects with D1472H had a significant decrease in the VWF:RCo/VWF:Ag ratio compared with those without D1472H, similar to the findings in the healthy control population (Flood, 2013).</p> | <p>There is variability in the VWF:RCo assay, which could be due to age-related change in factor levels, and quality assurance measures in the performing lab (sample handling, pre-analytical phase measures). Standardization among labs would help to get more accurate results.</p> |

**Certainty of the evidence of management's effects**

What is the overall certainty of the evidence of effects of the management that is guided by the test results?

| JUDGEMENT                                                                                                                                      | RESEARCH EVIDENCE                                                                                                                                                                                                                                                                                                                                                                                                                                                                                                                                                     | ADDITIONAL CONSIDERATIONS                                                                                                                                                                                                                                                                                                                                                                                                                                                                                                                                      |
|------------------------------------------------------------------------------------------------------------------------------------------------|-----------------------------------------------------------------------------------------------------------------------------------------------------------------------------------------------------------------------------------------------------------------------------------------------------------------------------------------------------------------------------------------------------------------------------------------------------------------------------------------------------------------------------------------------------------------------|----------------------------------------------------------------------------------------------------------------------------------------------------------------------------------------------------------------------------------------------------------------------------------------------------------------------------------------------------------------------------------------------------------------------------------------------------------------------------------------------------------------------------------------------------------------|
| <ul style="list-style-type: none"> <li>○ Very low</li> <li>○ Low</li> <li>○ Moderate</li> <li>● High</li> <li>○ No included studies</li> </ul> | <p>Because the VWF:RCo assay depends on ristocetin binding to VWF variants in the <i>VWF</i> gene may affect the measurement of “VWF activity” by this assay and may not reflect a functional defect or true hemorrhagic risk (Flood, 2010). Reliance on VWF:RCo alone for diagnostic purposes may be an error in those with p.D1472H (Christopherson, 2019). Type 1 VWD subjects with D1472H had a significant decrease in the VWF:RCo/VWF:Ag ratio compared with those without D1472H, similar to the findings in the healthy control population (Flood, 2013).</p> | <p>Treatment doses are based on ristocetin cofactor units. The diagnosis of VWD is challenging and requires the performance of multiple laboratory tests that will also determine the type of the disease. There are some limitations in laboratory diagnostic tests as well as overlapping nonspecific mild bleeding symptoms between healthy individuals and VWD patients. Results may confirm or exclude a prior diagnosis which may impact the patient's understanding of their bleeding and could help in the management to avoid excessive bleeding.</p> |

**Certainty of the evidence of test result/management**

How certain is the link between test results and management decisions?

| JUDGEMENT                                                                                                                                      | RESEARCH EVIDENCE | ADDITIONAL CONSIDERATIONS |
|------------------------------------------------------------------------------------------------------------------------------------------------|-------------------|---------------------------|
| <ul style="list-style-type: none"> <li>○ Very low</li> <li>○ Low</li> <li>○ Moderate</li> <li>○ High</li> <li>● No included studies</li> </ul> |                   |                           |

**Certainty of effects**

What is the overall certainty of the evidence of effects of the test?

| <b>JUDGEMENT</b>                                                                                                                               | <b>RESEARCH EVIDENCE</b>                          | <b>ADDITIONAL CONSIDERATIONS</b> |
|------------------------------------------------------------------------------------------------------------------------------------------------|---------------------------------------------------|----------------------------------|
| <ul style="list-style-type: none"> <li>● Very low</li> <li>○ Low</li> <li>○ Moderate</li> <li>○ High</li> <li>○ No included studies</li> </ul> | Refer to the Appendix at the end of the document. |                                  |

**Values**

Is there important uncertainty about or variability in how much people value the main outcomes?

| <b>JUDGEMENT</b>                                                                                                                                                                                                                                                 | <b>RESEARCH EVIDENCE</b>                                                                                                                                                                                                                                                                                                                                                                                                                                                                                                                                                                                          | <b>ADDITIONAL CONSIDERATIONS</b>                                                                                                                                                                                                                                                                                                                                                                                                                                                                                                                                        |
|------------------------------------------------------------------------------------------------------------------------------------------------------------------------------------------------------------------------------------------------------------------|-------------------------------------------------------------------------------------------------------------------------------------------------------------------------------------------------------------------------------------------------------------------------------------------------------------------------------------------------------------------------------------------------------------------------------------------------------------------------------------------------------------------------------------------------------------------------------------------------------------------|-------------------------------------------------------------------------------------------------------------------------------------------------------------------------------------------------------------------------------------------------------------------------------------------------------------------------------------------------------------------------------------------------------------------------------------------------------------------------------------------------------------------------------------------------------------------------|
| <ul style="list-style-type: none"> <li>○ Important uncertainty or variability</li> <li>● Possibly important uncertainty or variability</li> <li>○ Probably no important uncertainty or variability</li> <li>○ No important uncertainty or variability</li> </ul> | Patients are very familiar with having blood drawn for lab testing for any reason. Well-trained phlebotomists at blood disorder treatment centers are efficient and have a good technique which means little or no bruising from blood draws for specialized hematology laboratory tests (Aschman, 2014). Patients desire assays that can be trusted and do not have to be repeated on multiple occasions. Patient concerns or preferences that are specific to these specialized labs are not different than other blood testing techniques, but concerns arise regarding the cut-off value used. (Baker, 2019). | While patients are interested in the results of the antigen and activity assays but frequently have little understanding of the tests and diagnostic thresholds, they desire an accurate diagnosis that will lead to proper treatment. Patients value clear and consistent guidelines on the reasons for different test choices and the diagnostic thresholds used, as patients are frustrated when they are not able to determine if they definitively do or do not have VWD. In speaking with others who have VWD, patients may desire the same testing regardless of |



|  |  |                                                                                                                                                                                                                                                                                                                                                                                                                                                                                                                                                                                                                                                                             |
|--|--|-----------------------------------------------------------------------------------------------------------------------------------------------------------------------------------------------------------------------------------------------------------------------------------------------------------------------------------------------------------------------------------------------------------------------------------------------------------------------------------------------------------------------------------------------------------------------------------------------------------------------------------------------------------------------------|
|  |  | <p>need so they may compared results to each other. The VWF antigen and activity are continuous variables with a continuous increase in bleeding risk with lower levels. The clinical phenotype is determined by more than the levels only. Results may confirm or exclude a prior diagnosis which may impact the patient's understanding of their bleeding and its treatment and could provoke fear of bleeding (or thrombosis) if treatment is changed. It may also impact the patient's career choice and their surgical and procedural needs. Patients place value on the timing of getting the results of the test and sometimes they do not get the results back.</p> |
|--|--|-----------------------------------------------------------------------------------------------------------------------------------------------------------------------------------------------------------------------------------------------------------------------------------------------------------------------------------------------------------------------------------------------------------------------------------------------------------------------------------------------------------------------------------------------------------------------------------------------------------------------------------------------------------------------------|

**Balance of effects**  
Does the balance between desirable and undesirable effects favor the intervention or the comparison?

|                  |                          |                                  |
|------------------|--------------------------|----------------------------------|
| <b>JUDGEMENT</b> | <b>RESEARCH EVIDENCE</b> | <b>ADDITIONAL CONSIDERATIONS</b> |
|------------------|--------------------------|----------------------------------|

|                                                                                                                                                                                                                                                                                                                |                                                         |  |
|----------------------------------------------------------------------------------------------------------------------------------------------------------------------------------------------------------------------------------------------------------------------------------------------------------------|---------------------------------------------------------|--|
| <ul style="list-style-type: none"> <li>○ Favors the comparison</li> <li>○ Probably favors the comparison</li> <li>○ Does not favor either the intervention or the comparison</li> <li>● Probably favors the intervention</li> <li>○ Favors the intervention</li> <li>○ Varies</li> <li>○ Don't know</li> </ul> | <p>Refer to the Appendix at the end of the document</p> |  |
|----------------------------------------------------------------------------------------------------------------------------------------------------------------------------------------------------------------------------------------------------------------------------------------------------------------|---------------------------------------------------------|--|

**Resources required**  
How large are the resource requirements (costs)?

| <b>JUDGEMENT</b>                                                                                                                                                                                                               | <b>RESEARCH EVIDENCE</b>                                                                                                                                                                                                                                                                                                                                                                                                                                                                                                                                                                                                                                                                                                                                                                                                                                                                                                                                                                                                                                                                                    |               |                |                  |                  | <b>ADDITIONAL CONSIDERATIONS</b> |  |               |                |                  |                  |            |    |       |       |    |  |               |    |       |       |  |       |                  |    |        |     |         |  |                    |    |    |    |    |  |               |   |       |    |  |    |           |   |      |    |  |  |                                                                                                                                                                                                                                                                                                                                                                                             |
|--------------------------------------------------------------------------------------------------------------------------------------------------------------------------------------------------------------------------------|-------------------------------------------------------------------------------------------------------------------------------------------------------------------------------------------------------------------------------------------------------------------------------------------------------------------------------------------------------------------------------------------------------------------------------------------------------------------------------------------------------------------------------------------------------------------------------------------------------------------------------------------------------------------------------------------------------------------------------------------------------------------------------------------------------------------------------------------------------------------------------------------------------------------------------------------------------------------------------------------------------------------------------------------------------------------------------------------------------------|---------------|----------------|------------------|------------------|----------------------------------|--|---------------|----------------|------------------|------------------|------------|----|-------|-------|----|--|---------------|----|-------|-------|--|-------|------------------|----|--------|-----|---------|--|--------------------|----|----|----|----|--|---------------|---|-------|----|--|----|-----------|---|------|----|--|--|---------------------------------------------------------------------------------------------------------------------------------------------------------------------------------------------------------------------------------------------------------------------------------------------------------------------------------------------------------------------------------------------|
| <ul style="list-style-type: none"> <li>○ Large costs</li> <li>○ Moderate costs</li> <li>● Negligible costs and savings</li> <li>○ Moderate savings</li> <li>○ Large savings</li> <li>○ Varies</li> <li>○ Don't know</li> </ul> | <table border="1" data-bbox="289 1003 1392 1372"> <thead> <tr> <th></th> <th></th> <th><b>VWF:Ag</b></th> <th><b>VWF:RCo</b></th> <th><b>VWF:Gp1bR</b></th> <th><b>VWF:Gp1bM</b></th> </tr> </thead> <tbody> <tr> <td><b>USA</b></td> <td>\$</td> <td>25-30</td> <td>25-30</td> <td>80</td> <td></td> </tr> <tr> <td><b>Canada</b></td> <td>\$</td> <td>25-30</td> <td>25-30</td> <td></td> <td>25-30</td> </tr> <tr> <td><b>Australia</b></td> <td>\$</td> <td>80-120</td> <td>250</td> <td>160-220</td> <td></td> </tr> <tr> <td><b>New Zealand</b></td> <td>\$</td> <td>12</td> <td>20</td> <td>15</td> <td></td> </tr> <tr> <td><b>Europe</b></td> <td>€</td> <td>25-30</td> <td>25</td> <td></td> <td>25</td> </tr> <tr> <td><b>UK</b></td> <td>£</td> <td>8-20</td> <td>30</td> <td></td> <td></td> </tr> </tbody> </table> <p data-bbox="279 1388 1591 1453">There is considerable variability in cost among different jurisdictions. Cost is also affected by different factors including insurance plans. The estimate provided are based on the clinical experts best estimates. The data for</p> |               |                |                  |                  |                                  |  | <b>VWF:Ag</b> | <b>VWF:RCo</b> | <b>VWF:Gp1bR</b> | <b>VWF:Gp1bM</b> | <b>USA</b> | \$ | 25-30 | 25-30 | 80 |  | <b>Canada</b> | \$ | 25-30 | 25-30 |  | 25-30 | <b>Australia</b> | \$ | 80-120 | 250 | 160-220 |  | <b>New Zealand</b> | \$ | 12 | 20 | 15 |  | <b>Europe</b> | € | 25-30 | 25 |  | 25 | <b>UK</b> | £ | 8-20 | 30 |  |  | <p data-bbox="1654 998 1984 1339">Usually, the price is comparable between the assays, however, the cost borne by the patient and the cost to the lab will be different depending on multiple factors, and there is variability to what the health insurance reimburses.</p> <p data-bbox="1654 1388 1984 1485">For the USA, the price is the average insurance reimbursement price not</p> |
|                                                                                                                                                                                                                                |                                                                                                                                                                                                                                                                                                                                                                                                                                                                                                                                                                                                                                                                                                                                                                                                                                                                                                                                                                                                                                                                                                             | <b>VWF:Ag</b> | <b>VWF:RCo</b> | <b>VWF:Gp1bR</b> | <b>VWF:Gp1bM</b> |                                  |  |               |                |                  |                  |            |    |       |       |    |  |               |    |       |       |  |       |                  |    |        |     |         |  |                    |    |    |    |    |  |               |   |       |    |  |    |           |   |      |    |  |  |                                                                                                                                                                                                                                                                                                                                                                                             |
| <b>USA</b>                                                                                                                                                                                                                     | \$                                                                                                                                                                                                                                                                                                                                                                                                                                                                                                                                                                                                                                                                                                                                                                                                                                                                                                                                                                                                                                                                                                          | 25-30         | 25-30          | 80               |                  |                                  |  |               |                |                  |                  |            |    |       |       |    |  |               |    |       |       |  |       |                  |    |        |     |         |  |                    |    |    |    |    |  |               |   |       |    |  |    |           |   |      |    |  |  |                                                                                                                                                                                                                                                                                                                                                                                             |
| <b>Canada</b>                                                                                                                                                                                                                  | \$                                                                                                                                                                                                                                                                                                                                                                                                                                                                                                                                                                                                                                                                                                                                                                                                                                                                                                                                                                                                                                                                                                          | 25-30         | 25-30          |                  | 25-30            |                                  |  |               |                |                  |                  |            |    |       |       |    |  |               |    |       |       |  |       |                  |    |        |     |         |  |                    |    |    |    |    |  |               |   |       |    |  |    |           |   |      |    |  |  |                                                                                                                                                                                                                                                                                                                                                                                             |
| <b>Australia</b>                                                                                                                                                                                                               | \$                                                                                                                                                                                                                                                                                                                                                                                                                                                                                                                                                                                                                                                                                                                                                                                                                                                                                                                                                                                                                                                                                                          | 80-120        | 250            | 160-220          |                  |                                  |  |               |                |                  |                  |            |    |       |       |    |  |               |    |       |       |  |       |                  |    |        |     |         |  |                    |    |    |    |    |  |               |   |       |    |  |    |           |   |      |    |  |  |                                                                                                                                                                                                                                                                                                                                                                                             |
| <b>New Zealand</b>                                                                                                                                                                                                             | \$                                                                                                                                                                                                                                                                                                                                                                                                                                                                                                                                                                                                                                                                                                                                                                                                                                                                                                                                                                                                                                                                                                          | 12            | 20             | 15               |                  |                                  |  |               |                |                  |                  |            |    |       |       |    |  |               |    |       |       |  |       |                  |    |        |     |         |  |                    |    |    |    |    |  |               |   |       |    |  |    |           |   |      |    |  |  |                                                                                                                                                                                                                                                                                                                                                                                             |
| <b>Europe</b>                                                                                                                                                                                                                  | €                                                                                                                                                                                                                                                                                                                                                                                                                                                                                                                                                                                                                                                                                                                                                                                                                                                                                                                                                                                                                                                                                                           | 25-30         | 25             |                  | 25               |                                  |  |               |                |                  |                  |            |    |       |       |    |  |               |    |       |       |  |       |                  |    |        |     |         |  |                    |    |    |    |    |  |               |   |       |    |  |    |           |   |      |    |  |  |                                                                                                                                                                                                                                                                                                                                                                                             |
| <b>UK</b>                                                                                                                                                                                                                      | £                                                                                                                                                                                                                                                                                                                                                                                                                                                                                                                                                                                                                                                                                                                                                                                                                                                                                                                                                                                                                                                                                                           | 8-20          | 30             |                  |                  |                                  |  |               |                |                  |                  |            |    |       |       |    |  |               |    |       |       |  |       |                  |    |        |     |         |  |                    |    |    |    |    |  |               |   |       |    |  |    |           |   |      |    |  |  |                                                                                                                                                                                                                                                                                                                                                                                             |

|  |                                                                                                                                  |                    |
|--|----------------------------------------------------------------------------------------------------------------------------------|--------------------|
|  | required resources for some of the assays are not available because of lack of availability of the assay in different countries. | laboratory charge. |
|--|----------------------------------------------------------------------------------------------------------------------------------|--------------------|

**Certainty of evidence of required resources**  
 What is the certainty of the evidence of resource requirements (costs)?

| <b>JUDGEMENT</b>                                                                                                                               | <b>RESEARCH EVIDENCE</b> | <b>ADDITIONAL CONSIDERATIONS</b>                                                                                                                                                                                                                                                                                                                                                                                                                                  |
|------------------------------------------------------------------------------------------------------------------------------------------------|--------------------------|-------------------------------------------------------------------------------------------------------------------------------------------------------------------------------------------------------------------------------------------------------------------------------------------------------------------------------------------------------------------------------------------------------------------------------------------------------------------|
| <ul style="list-style-type: none"> <li>○ Very low</li> <li>○ Low</li> <li>○ Moderate</li> <li>○ High</li> <li>● No included studies</li> </ul> |                          | <p>The cost and difficulty of good quality control of these tests make these exams less accessible. There is difficulty in running multiple assays due to cost considerations, and reimbursement being only available for a limited number of tests in an individual patient.</p> <p>Physicians should choose the assays that have basic requirements and then identify those that could be of use in settings where the resource is not so much of an issue.</p> |

**Cost effectiveness**  
 Does the cost-effectiveness of the intervention favor the intervention or the comparison?

| <b>JUDGEMENT</b> | <b>RESEARCH EVIDENCE</b> | <b>ADDITIONAL CONSIDERATIONS</b> |
|------------------|--------------------------|----------------------------------|
|                  |                          |                                  |

|                                                                                                                                                                                                                                                                                                                         |                                                                                                                                                                                                                                                                                                                                                                                                                                                                                                                                                                                 |                                                                                   |
|-------------------------------------------------------------------------------------------------------------------------------------------------------------------------------------------------------------------------------------------------------------------------------------------------------------------------|---------------------------------------------------------------------------------------------------------------------------------------------------------------------------------------------------------------------------------------------------------------------------------------------------------------------------------------------------------------------------------------------------------------------------------------------------------------------------------------------------------------------------------------------------------------------------------|-----------------------------------------------------------------------------------|
| <ul style="list-style-type: none"> <li>○ Favors the comparison</li> <li>○ Probably favors the comparison</li> <li>● Does not favor either the intervention or the comparison</li> <li>○ Probably favors the intervention</li> <li>○ Favors the intervention</li> <li>○ Varies</li> <li>○ No included studies</li> </ul> | <p>In a Markov decision analytic model taking a societal perspective and costs expressed in 2007 US dollars, the cost of testing adolescents with menorrhagia for VWD was \$1790, versus \$1251 for not testing for VWD. The effectiveness of not testing in quality-adjusted life-years (QALYs) gained (14.237 QALYs) was similar to the VWD testing strategy (14.246 QALYs). Compared with not testing for VWD, screening for VWD had an incremental cost-effectiveness ratio of \$62 791 per QALY, a value typically considered economically reasonable (Sidonio, 2010).</p> | <p>Considerations should be made for the overall cost of not testing for VWD.</p> |
|-------------------------------------------------------------------------------------------------------------------------------------------------------------------------------------------------------------------------------------------------------------------------------------------------------------------------|---------------------------------------------------------------------------------------------------------------------------------------------------------------------------------------------------------------------------------------------------------------------------------------------------------------------------------------------------------------------------------------------------------------------------------------------------------------------------------------------------------------------------------------------------------------------------------|-----------------------------------------------------------------------------------|

**Equity**  
What would be the impact on health equity?

| <b>JUDGEMENT</b>                                                                                                                                                                                                 | <b>RESEARCH EVIDENCE</b> | <b>ADDITIONAL CONSIDERATIONS</b>                                                                                                                                                                                                                                                                                                                           |
|------------------------------------------------------------------------------------------------------------------------------------------------------------------------------------------------------------------|--------------------------|------------------------------------------------------------------------------------------------------------------------------------------------------------------------------------------------------------------------------------------------------------------------------------------------------------------------------------------------------------|
| <ul style="list-style-type: none"> <li>○ Reduced</li> <li>○ Probably reduced</li> <li>○ Probably no impact</li> <li>● Probably increased</li> <li>○ Increased</li> <li>○ Varies</li> <li>○ Don't know</li> </ul> |                          | <p>There is a subtle difference in comparisons between the tests in terms of equity. Not all tests are accessible to all patients. Therefore, a thorough and proper investigation may be limited due to the high cost and lack of exams with appropriate quality control. Insurance coverage for these tests is variable based on location and funding</p> |

model. In the United States of America, most private insurance will cover VWF antigen and activity assays, but some patients may have a large deductible. Sometimes the reimbursed value does not cover the overall cost of the test, especially in public services. In New Zealand specifically, all residents get blood tests for free. This is also applicable in the United Kingdom, since there is no practical restriction on requesting these tests. In Italy, they are partly covered by insurance. In Australia, a limited number of antigen and activity assays are covered by insurance - above 3 assays the cost is not covered. In the Netherlands, all assays are covered by insurance. The VWF:RCo is potentially less useful in the African American population given the higher frequency of the D1472H variant in this population. Because of the higher rate of the benign variants that affect the VWF:RCo giving false positively low results, the VWF:GPIbM testing can be used in followup testing in Hispanic and African

|                                                                                                                                                                                                                 |                          |                                                                                                                                                                                                                                                                                                                               |
|-----------------------------------------------------------------------------------------------------------------------------------------------------------------------------------------------------------------|--------------------------|-------------------------------------------------------------------------------------------------------------------------------------------------------------------------------------------------------------------------------------------------------------------------------------------------------------------------------|
|                                                                                                                                                                                                                 |                          | American populations more than Caucasian. The aforementioned populations may be less likely to have easy access to larger centers.                                                                                                                                                                                            |
| <b>Acceptability</b><br>Is the intervention acceptable to key stakeholders?                                                                                                                                     |                          |                                                                                                                                                                                                                                                                                                                               |
| <b>JUDGEMENT</b>                                                                                                                                                                                                | <b>RESEARCH EVIDENCE</b> | <b>ADDITIONAL CONSIDERATIONS</b>                                                                                                                                                                                                                                                                                              |
| <input type="radio"/> No<br><input type="radio"/> Probably no<br><input type="radio"/> Probably yes<br><input checked="" type="radio"/> Yes<br><input type="radio"/> Varies<br><input type="radio"/> Don't know |                          | Generally, all patients accept the blood tests in question.                                                                                                                                                                                                                                                                   |
| <b>Feasibility</b><br>Is the intervention feasible to implement?                                                                                                                                                |                          |                                                                                                                                                                                                                                                                                                                               |
| <b>JUDGEMENT</b>                                                                                                                                                                                                | <b>RESEARCH EVIDENCE</b> | <b>ADDITIONAL CONSIDERATIONS</b>                                                                                                                                                                                                                                                                                              |
| <input type="radio"/> No<br><input type="radio"/> Probably no<br><input checked="" type="radio"/> Probably yes<br><input type="radio"/> Yes<br><input type="radio"/> Varies<br><input type="radio"/> Don't know |                          | Antigen and activity assays have limited availability – available in most larger population centers will have centralized testing in specialist centers. It is usually not found in resource-poor countries and tertiary care centers even in high-income setting countries, specifically the activity assays. VWF:GPIIb/IIIa |

or GPIbR is not available in most centers in the United States of America, but VWF:Ag and VWF:RCo are more readily available. VWF:Ag is only available in hospitals with special coagulation labs, and special coagulation labs usually only run either the VWF:RCo or one of the newer assays.

Countries differ in the challenges to access the testing (referrals within the system and logistic issues like traveling hundreds of kilometers), so testing is often sent out reference laboratories (with all the issues of pre-analytical variables, including sample collection and transport that can affect the reliability of results) outside of medium to large academic centers in the United States. Even when the tests are available in smaller non-academic centers, results may differ when compared to those from large referral centers.

Depending on where patients are allowed to undergo testing, there could be variation in results ( e.g., in California, insurers may not reimburse repeat

testing of VWF:Ag and VWF:RCo or VWF:GPIIb/IIIa to be done at the respective academic center if performed already at private commercial laboratories). Often repeat testing is needed particularly if obtained at a time of stress (following a procedure) or in times of significant anemia. This issue is illustrated with teenage girls undergoing evaluation during an episode of heavy menstrual bleeding. Levels may be elevated over baseline and obscure the diagnosis of VWD or its subtype. It may be possible to say that one or two activity measures are not accurate and reduce their use, but many labs are bound by managed service contracts and performing all labs as a single 'best' assay is often not feasible. Another feasibility issue assay availability and turnaround time in the perioperative setting. Some of the tests, such as the VWF:RCo, have a considerable coefficient of variation, which may influence laboratory research. In addition, the



|  |  |                                                                                                                                                             |
|--|--|-------------------------------------------------------------------------------------------------------------------------------------------------------------|
|  |  | physiological or induced variations of VWF plasma levels also may affect the diagnosis of borderline cases, especially of type 1 VWD and low levels of VWF. |
|--|--|-------------------------------------------------------------------------------------------------------------------------------------------------------------|

## SUMMARY OF JUDGEMENTS

|                                                     | JUDGEMENT                            |                                                      |                                                  |                                         |  |        |                            |
|-----------------------------------------------------|--------------------------------------|------------------------------------------------------|--------------------------------------------------|-----------------------------------------|--|--------|----------------------------|
| PROBLEM                                             | No                                   | Probably no                                          | Probably yes                                     | Yes                                     |  | Varies | Don't know                 |
| TEST ACCURACY                                       | Very inaccurate                      | Inaccurate                                           | <b>Accurate</b>                                  | Very accurate                           |  | Varies | Don't know                 |
| DESIRABLE EFFECTS                                   | Trivial                              | Small                                                | <b>Moderate</b>                                  | Large                                   |  | Varies | Don't know                 |
| UNDESIRABLE EFFECTS                                 | Large                                | Moderate                                             | Small                                            | <b>Trivial</b>                          |  | Varies | Don't know                 |
| CERTAINTY OF THE EVIDENCE OF TEST ACCURACY          | Very low                             | <b>Low</b>                                           | Moderate                                         | High                                    |  |        | No included studies        |
| CERTAINTY OF THE EVIDENCE OF TEST'S EFFECTS         | Very low                             | Low                                                  | Moderate                                         | <b>High</b>                             |  |        | No included studies        |
| CERTAINTY OF THE EVIDENCE OF MANAGEMENT'S EFFECTS   | Very low                             | Low                                                  | Moderate                                         | <b>High</b>                             |  |        | No included studies        |
| CERTAINTY OF THE EVIDENCE OF TEST RESULT/MANAGEMENT | Very low                             | Low                                                  | Moderate                                         | High                                    |  |        | <b>No included studies</b> |
| CERTAINTY OF EFFECTS                                | <b>Very low</b>                      | Low                                                  | Moderate                                         | High                                    |  |        | No included studies        |
| VALUES                                              | Important uncertainty or variability | <b>Possibly important uncertainty or variability</b> | Probably no important uncertainty or variability | No important uncertainty or variability |  |        |                            |

|                                             | JUDGEMENT             |                                |                                                                 |                                         |                         |        |                            |
|---------------------------------------------|-----------------------|--------------------------------|-----------------------------------------------------------------|-----------------------------------------|-------------------------|--------|----------------------------|
| BALANCE OF EFFECTS                          | Favors the comparison | Probably favors the comparison | Does not favor either the intervention or the comparison        | <b>Probably favors the intervention</b> | Favors the intervention | Varies | Don't know                 |
| RESOURCES REQUIRED                          | Large costs           | Moderate costs                 | <b>Negligible costs and savings</b>                             | Moderate savings                        | Large savings           | Varies | Don't know                 |
| CERTAINTY OF EVIDENCE OF REQUIRED RESOURCES | Very low              | Low                            | Moderate                                                        | High                                    |                         |        | <b>No included studies</b> |
| COST EFFECTIVENESS                          | Favors the comparison | Probably favors the comparison | <b>Does not favor either the intervention or the comparison</b> | Probably favors the intervention        | Favors the intervention | Varies | No included studies        |
| EQUITY                                      | Reduced               | Probably reduced               | Probably no impact                                              | <b>Probably increased</b>               | Increased               | Varies | Don't know                 |
| ACCEPTABILITY                               | No                    | Probably no                    | Probably yes                                                    | <b>Yes</b>                              |                         | Varies | Don't know                 |
| FEASIBILITY                                 | No                    | Probably no                    | <b>Probably yes</b>                                             | Yes                                     |                         | Varies | Don't know                 |

#### TYPE OF RECOMMENDATION

|                                                     |                                                          |                                                                               |                                                             |                                                 |
|-----------------------------------------------------|----------------------------------------------------------|-------------------------------------------------------------------------------|-------------------------------------------------------------|-------------------------------------------------|
| Strong recommendation against the intervention<br>○ | Conditional recommendation against the intervention<br>○ | Conditional recommendation for either the intervention or the comparison<br>○ | <b>Conditional recommendation for the intervention</b><br>● | Strong recommendation for the intervention<br>○ |
|-----------------------------------------------------|----------------------------------------------------------|-------------------------------------------------------------------------------|-------------------------------------------------------------|-------------------------------------------------|

#### CONCLUSIONS

##### Recommendation

The panel suggests newer assays that measure the platelet binding activity of VWF (e.g. VWF:GPIbM, VWF:GPIbR) over the VWF:RCo (automated or non-automated assay) for the diagnosis of VWD.

(Conditional recommendation based on low certainty in the evidence)

Remark:

- A critical consideration is the poor performance of the VWF:RCo in specific patient groups such as African Americans

Good practice statement:

- VWF activity assays should be performed in a lab with appropriate expertise.

### Justification

The guideline panel determined that there is low certainty in the evidence for a net health benefit from using VWF:GplbR and VWF:GplbM over VWF:RCo in patients suspected of VWD. Other EtD criteria were generally in favor of using VWF:GplbR and VWF:GplbM so that the desirable consequences were greater than the undesirable consequences.

### Subgroup considerations

### Implementation considerations

### Monitoring and evaluation

### Research priorities

- Variability of the different assays in different ethnic groups.

## APPENDIX

### 1. Risk of bias:

| Author          | Year | Patient Selection | Index test | Reference test | Flow and timing |
|-----------------|------|-------------------|------------|----------------|-----------------|
| Vangenechten, K | 2018 | High              | Low        | Low            | Low             |
| Boender, J      | 2018 | Moderate          | Low        | Moderate       | Low             |
| Sagheer, S      | 2016 | High              | Low        | Low            | Low             |
| Costa Pento     | 2014 | High              | Low        | Low            | Low             |
| Verfaillie, C   | 2013 | High              | Low        | Low            | Low             |
| Cabrera, N      | 2013 | High              | Low        | Moderate       | Low             |
| Lasne, D        | 2012 | High              | Low        | Low            | Low             |
| Trossaert, M    | 2011 | Low               | Low        | Low            | Low             |
| Chen, D         | 2011 | High              | Low        | Low            | Low             |
| Salem, R        | 2007 | Low               | Low        | Low            | Low             |
| Pinol, M        | 2007 | High              | Low        | Low            | Low             |
| Vleeschauwer, A | 2006 | High              | Low        | Low            | Low             |
| Strandberg, K   | 2006 | High              | Low        | Low            | Low             |

## 2. Outcomes:

| Author          | Year | PICO arm                                      | TP  | FN | FP | TN  | Sens  | Low CI | Up CI | Spec  | Low CI | Up CI |
|-----------------|------|-----------------------------------------------|-----|----|----|-----|-------|--------|-------|-------|--------|-------|
| Vangenechten, K | 2018 | VWF:RCo was measured by using the BC-VWF:Rco  | 43  | 7  | 11 | 76  | 0.86  | 0.734  | 0.932 | 0.874 | 0.786  | 0.929 |
|                 |      | HemosIL VWF:RCo, ISTH nomenclature VWF: GPIbR | 40  | 10 | 6  | 81  | 0.8   | 0.667  | 0.889 | 0.931 | 0.855  | 0.969 |
|                 |      | The INNOVANCE VWF:Ac, VWF:GPIbM               | 41  | 9  | 9  | 79  | 0.82  | 0.689  | 0.904 | 0.898 | 0.815  | 0.946 |
| Boender, J      | 2018 | VWF:RCo was measured by using the BC-VWF:Rco  | 102 | 21 | 20 | 405 | 0.829 | 0.752  | 0.886 | 0.953 | 0.928  | 0.969 |
|                 |      | HemosIL AcuStar VWF:RCo'                      | 154 | 36 | 14 | 402 | 0.811 | 0.748  | 0.86  | 0.966 | 0.944  | 0.98  |
|                 |      | VWF:GPIbM                                     | 123 | 76 | 12 | 413 | 0.618 | 0.549  | 0.683 | 0.972 | 0.951  | 0.984 |
| Sagheer, S      | 2016 | VWF:RCo[Agg]                                  | 17  | 1  | 5  | 37  | 0.944 | 0.693  | 0.992 | 0.881 | 0.744  | 0.95  |
|                 |      | VWF:RCo[Acu]                                  | 18  | 0  | 8  | 34  | 0.974 | 0.69   | 0.998 | 0.802 | 0.657  | 0.896 |
| Costa Pento     | 2014 | VWF:RCo[Agg]                                  | 146 | 0  | 2  | 28  | 0.997 | 0.948  | 1     | 0.919 | 0.758  | 0.976 |
|                 |      | VWF:RCo[Acu]                                  | 146 | 0  | 1  | 29  | 0.997 | 0.948  | 1     | 0.952 | 0.792  | 0.99  |
| Verfaillie, C   | 2013 | HemosIL VWF:Rco                               | 11  | 0  | 7  | 32  | 0.958 | 0.575  | 0.997 | 0.812 | 0.662  | 0.906 |
| Cabrera, N      | 2013 | HemosIL AcuStar VWF:Rco                       | 70  | 3  | 0  | 18  | 0.953 | 0.873  | 0.983 | 0.974 | 0.69   | 0.998 |
| Trossaert, M    | 2011 | VWF:RCo was measured by using the BC-VWF:Rco  | 86  | 28 | 9  | 146 | 0.754 | 0.667  | 0.825 | 0.942 | 0.892  | 0.97  |
| Pinol, M        | 2007 | VWF:RCo[Agg]                                  | 69  | 1  | 4  | 53  | 0.986 | 0.906  | 0.998 | 0.93  | 0.827  | 0.973 |
| Strandberg, K   | 2006 | VWF:RCo was measured by using the BC-VWF:Rco  | 70  | 33 | 5  | 246 | 0.68  | 0.584  | 0.762 | 0.98  | 0.953  | 0.992 |

### ➤ VWF:RCo vs VWF:GplbR:

| VWF:RCo     |              | VWF:GplbR   |              |
|-------------|--------------|-------------|--------------|
| Sensitivity | 0.83 to 1.00 | Sensitivity | 0.80 to 1.00 |
| Specificity | 0.87 to 0.95 | Specificity | 0.81 to 0.97 |

| Prevalences | 3% | 20% | 50% |
|-------------|----|-----|-----|
|             |    |     |     |

| Outcome                                                                    | No of studies (No of patients) | Study design                       | Factors that may decrease certainty of evidence |                      |               |                      |                  | Effect per 1,000 patients tested         |                                          |                                          |            |                                          |            | Test accuracy CoE |
|----------------------------------------------------------------------------|--------------------------------|------------------------------------|-------------------------------------------------|----------------------|---------------|----------------------|------------------|------------------------------------------|------------------------------------------|------------------------------------------|------------|------------------------------------------|------------|-------------------|
|                                                                            |                                |                                    |                                                 |                      |               |                      |                  | pre-test probability of 3% <sup>c</sup>  |                                          | pre-test probability of 20% <sup>d</sup> |            | pre-test probability of 50% <sup>e</sup> |            |                   |
|                                                                            |                                |                                    | Risk of bias                                    | Indirectness         | Inconsistency | Imprecision          | Publication bias | VWF:RCO                                  | VWF:GplbR                                | VWF:RCO                                  | VWF:GplbR  | VWF:RCO                                  | VWF:GplbR  |                   |
| <b>True positives</b> (patients with VWD)                                  | 4 studies (404 patients)       | cohort & case-control type studies | serious <sup>a</sup>                            | serious <sup>f</sup> | not serious   | not serious          | none             | 25 to 30                                 | 24 to 30                                 | 166 to 200                               | 160 to 200 | 415 to 500                               | 400 to 500 | ⊕⊕⊕○<br>MODERATE  |
| <b>1 more to 0 fewer TP in VWF:RCO</b>                                     |                                |                                    |                                                 |                      |               |                      |                  | <b>6 more to 0 fewer TP in VWF:RCO</b>   |                                          | <b>15 more to 0 fewer TP in VWF:RCO</b>  |            |                                          |            |                   |
| 0 to 5                                                                     |                                |                                    |                                                 |                      |               |                      |                  | 0 to 6                                   | 0 to 34                                  | 0 to 40                                  | 0 to 85    | 0 to 100                                 |            |                   |
| <b>False negatives</b> (patients incorrectly classified as not having VWD) |                                |                                    |                                                 |                      |               |                      |                  | <b>1 fewer to 0 fewer FN in VWF:RCO</b>  | <b>6 fewer to 0 fewer FN in VWF:RCO</b>  | <b>15 fewer to 0 fewer FN in VWF:RCO</b> |            |                                          |            |                   |
| <b>True negatives</b> (patients without VWD)                               | 4 studies (584 patients)       | cohort & case-control type studies | serious <sup>a</sup>                            | serious <sup>f</sup> | not serious   | serious <sup>b</sup> | none             | 844 to 922                               | 786 to 941                               | 696 to 760                               | 648 to 776 | 435 to 475                               | 405 to 485 | ⊕⊕○○<br>LOW       |
| <b>58 more to 19 fewer TN in VWF:RCO</b>                                   |                                |                                    |                                                 |                      |               |                      |                  | <b>48 more to 16 fewer TN in VWF:RCO</b> |                                          | <b>30 more to 10 fewer TN in VWF:RCO</b> |            |                                          |            |                   |
| 48 to 126                                                                  |                                |                                    |                                                 |                      |               |                      |                  | 29 to 184                                | 40 to 104                                | 24 to 152                                | 25 to 65   | 15 to 95                                 |            |                   |
| <b>False positives</b> (patients incorrectly classified as)                |                                |                                    |                                                 |                      |               |                      |                  | <b>58 fewer to 19 more FP in VWF:RCO</b> | <b>48 fewer to 16 more FP in VWF:RCO</b> | <b>30 fewer to 10 more FP in VWF:RCO</b> |            |                                          |            |                   |

| Outcome     | No of studies (No of patients) | Study design | Factors that may decrease certainty of evidence |              |               |             |                  | Effect per 1,000 patients tested        |            |                                          |            |                                          |            | Test accuracy CoE |
|-------------|--------------------------------|--------------|-------------------------------------------------|--------------|---------------|-------------|------------------|-----------------------------------------|------------|------------------------------------------|------------|------------------------------------------|------------|-------------------|
|             |                                |              |                                                 |              |               |             |                  | pre-test probability of 3% <sup>c</sup> |            | pre-test probability of 20% <sup>d</sup> |            | pre-test probability of 50% <sup>e</sup> |            |                   |
|             |                                |              | Risk of bias                                    | Indirectness | Inconsistency | Imprecision | Publication bias | VWF:RCo                                 | VWF:Gpl bR | VWF:RCo                                  | VWF:Gpl bR | VWF:RCo                                  | VWF:Gpl bR |                   |
| having VWD) |                                |              |                                                 |              |               |             |                  |                                         |            |                                          |            |                                          |            |                   |

**Explanations**

- a. Serious patient selection risk of bias due to case-control design. Also, three of the four studies (Boender (2018), Vangenechten (2018) and Sagheer (2016)) investigated test accuracy for classifying Type 2 VWD patients (using a ratio of 0.6), not for diagnosing VWD
- b. Considering the extremes of the confidence interval may lead to a different decision about which test to use
- c. Typically seen in patients investigated for VWD because of a personal history of abnormal laboratory test (e.g., increased PTT).
- d. Typically seen in patients investigated for VWD because of a personal history of bleeding symptoms (e.g., mucocutaneous bleeding). - Quiroga, 2007.
- e. Typically seen in patients investigated for VWD as a first degree relative for a patient with VWD.
- f. Studies do not include a considerable number of African American patients, and therefore do not consider the D1472H variant.

➤ *VWF:RCo:*

| Study              | TP  | FP | FN | TN  | Sensitivity (95% CI) | Specificity (95% CI) | Sensitivity (95% CI) | Specificity (95% CI) |
|--------------------|-----|----|----|-----|----------------------|----------------------|----------------------|----------------------|
| Boender, 2018      | 102 | 20 | 21 | 405 | 0.83 [0.75, 0.89]    | 0.95 [0.93, 0.97]    |                      |                      |
| Costa Pento, 2014  | 146 | 2  | 0  | 28  | 1.00 [0.98, 1.00]    | 0.93 [0.78, 0.99]    |                      |                      |
| Sagheer, 2016      | 17  | 5  | 1  | 37  | 0.94 [0.73, 1.00]    | 0.88 [0.74, 0.96]    |                      |                      |
| Vangenechten, 2018 | 43  | 11 | 7  | 76  | 0.86 [0.73, 0.94]    | 0.87 [0.79, 0.94]    |                      |                      |

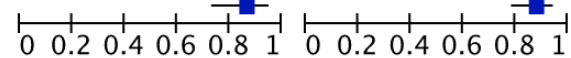

|             |              |
|-------------|--------------|
| Sensitivity | 0.83 to 1.00 |
| Specificity | 0.87 to 0.95 |

| Prevalences | 3% | 20% | 50% |
|-------------|----|-----|-----|
|             |    |     |     |

| Outcome                                                                    | No of studies (No of patients) | Study design                       | Factors that may decrease certainty of evidence |              |               |             |                  | Effect per 1,000 patients tested        |                                          |                                          | Test accuracy CoE |
|----------------------------------------------------------------------------|--------------------------------|------------------------------------|-------------------------------------------------|--------------|---------------|-------------|------------------|-----------------------------------------|------------------------------------------|------------------------------------------|-------------------|
|                                                                            |                                |                                    | Risk of bias                                    | Indirectness | Inconsistency | Imprecision | Publication bias | pre-test probability of 3% <sup>c</sup> | pre-test probability of 20% <sup>d</sup> | pre-test probability of 50% <sup>e</sup> |                   |
| <b>True positives</b> (patients with VWD)                                  | 4 studies<br>337 patients      | cohort & case-control type studies | serious <sup>a</sup>                            | not serious  | not serious   | not serious | none             | 25 to 30                                | 166 to 200                               | 415 to 500                               | ⊕⊕⊕○<br>MODERATE  |
| <b>False negatives</b> (patients incorrectly classified as not having VWD) |                                |                                    |                                                 |              |               |             |                  | 0 to 5                                  | 0 to 34                                  | 0 to 85                                  |                   |
| <b>True negatives</b> (patients without VWD)                               | 4 studies<br>584 patients      | cohort & case-control type studies | serious <sup>a</sup>                            | not serious  | not serious   | not serious | none             | 844 to 922                              | 696 to 760                               | 435 to 475                               | ⊕⊕○○<br>LOW       |
| <b>False positives</b> (patients incorrectly classified as having VWD)     |                                |                                    |                                                 |              |               |             |                  | 48 to 126                               | 40 to 104                                | 25 to 65                                 |                   |

*Explanations*

a. Serious patient selection risk of bias due to case-control design. Also, three of the four studies (Boender (2018), Vangenechten (2018) and Sagheer (2016)) investigated test accuracy for classifying Type 2 VWD patients (using a ratio of 0.6), not for diagnosing VWD

b. Typically seen in patients investigated for VWD because of a personal history of abnormal laboratory test (e.g., increased PTT).

c. Typically seen in patients investigated for VWD because of a personal history of bleeding symptoms (e.g., mucocutaneous bleeding). - Quiroga, 2007.

d. Typically seen in patients investigated for VWD as a first degree relative for a patient with VWD.

➤ VWF:GPIbR:



| Study              | TP  | FP | FN | TN  | Sensitivity (95% CI) | Specificity (95% CI) | Sensitivity (95% CI) | Specificity (95% CI) |
|--------------------|-----|----|----|-----|----------------------|----------------------|----------------------|----------------------|
| Boender, 2018      | 154 | 14 | 36 | 402 | 0.81 [0.75, 0.86]    | 0.97 [0.94, 0.98]    |                      |                      |
| Costa Pento, 2014  | 146 | 1  | 0  | 29  | 1.00 [0.98, 1.00]    | 0.97 [0.83, 1.00]    |                      |                      |
| Sagheer, 2016      | 18  | 8  | 0  | 34  | 1.00 [0.81, 1.00]    | 0.81 [0.66, 0.91]    |                      |                      |
| Vangenechten, 2018 | 40  | 6  | 10 | 81  | 0.80 [0.66, 0.90]    | 0.93 [0.86, 0.97]    |                      |                      |

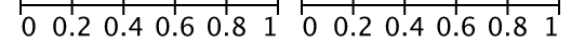

|             |              |
|-------------|--------------|
| Sensitivity | 0.80 to 1.00 |
| Specificity | 0.81 to 0.97 |

|             |    |     |     |
|-------------|----|-----|-----|
| Prevalences | 3% | 20% | 50% |
|-------------|----|-----|-----|

| Outcome                                                                    | No of studies (No of patients) | Study design                       | Factors that may decrease certainty of evidence |              |               |             |                  | Effect per 1,000 patients tested        |                                          |                                          | Test accuracy CoE |
|----------------------------------------------------------------------------|--------------------------------|------------------------------------|-------------------------------------------------|--------------|---------------|-------------|------------------|-----------------------------------------|------------------------------------------|------------------------------------------|-------------------|
|                                                                            |                                |                                    | Risk of bias                                    | Indirectness | Inconsistency | Imprecision | Publication bias | pre-test probability of 3% <sup>c</sup> | pre-test probability of 20% <sup>d</sup> | pre-test probability of 50% <sup>e</sup> |                   |
| <b>True positives</b> (patients with VWD)                                  | 4 studies<br>404 patients      | cohort & case-control type studies | serious <sup>a</sup>                            | not serious  | not serious   | not serious | none             | 24 to 30                                | 160 to 200                               | 400 to 500                               | ⊕⊕⊕○<br>MODERATE  |
| <b>False negatives</b> (patients incorrectly classified as not having VWD) |                                |                                    |                                                 |              |               |             |                  | 0 to 6                                  | 0 to 40                                  | 0 to 100                                 |                   |
| <b>True negatives</b> (patients without VWD)                               | 4 studies<br>575 patients      | cohort & case-control type studies | serious <sup>a</sup>                            | not serious  | not serious   | not serious | none             | 786 to 941                              | 648 to 776                               | 405 to 485                               | ⊕⊕○○<br>LOW       |
| <b>False positives</b> (patients incorrectly classified as having VWD)     |                                |                                    |                                                 |              |               |             |                  | 29 to 184                               | 24 to 152                                | 15 to 95                                 |                   |

**Explanations**

- a. Serious patient selection risk of bias due to case-control design. Also, three of the four studies (Boender (2018), Vangenechten (2018) and Sagheer (2016)) investigated test accuracy for classifying Type 2 VWD patients (using a ratio of 0.6), not for diagnosing VWD
- b. Typically seen in patients investigated for VWD because of a personal history of abnormal laboratory test (e.g., increased PTT).
- c. Typically seen in patients investigated for VWD because of a personal history of bleeding symptoms (e.g., mucocutaneous bleeding). - Quiroga, 2007.
- d. Typically seen in patients investigated for VWD as a first degree relative for a patient with VWD.

➤ *VWF:GPIbM:*

| Study              | TP  | FP | FN | TN  | Sensitivity (95% CI) | Specificity (95% CI) | Sensitivity (95% CI) | Specificity (95% CI) |
|--------------------|-----|----|----|-----|----------------------|----------------------|----------------------|----------------------|
| Boender, 2018      | 123 | 12 | 76 | 413 | 0.62 [0.55, 0.69]    | 0.97 [0.95, 0.99]    |                      |                      |
| Vangenechten, 2018 | 41  | 9  | 9  | 79  | 0.82 [0.69, 0.91]    | 0.90 [0.81, 0.95]    |                      |                      |

|             |              |
|-------------|--------------|
| Sensitivity | 0.62 to 0.82 |
| Specificity | 0.90 to 0.97 |

|             |    |     |     |
|-------------|----|-----|-----|
| Prevalences | 3% | 20% | 50% |
|-------------|----|-----|-----|

| Outcome                                                                    | No of studies (No of patients) | Study design                       | Factors that may decrease certainty of evidence |              |               |             |                  | Effect per 1,000 patients tested        |                                          |                                          | Test accuracy CoE |
|----------------------------------------------------------------------------|--------------------------------|------------------------------------|-------------------------------------------------|--------------|---------------|-------------|------------------|-----------------------------------------|------------------------------------------|------------------------------------------|-------------------|
|                                                                            |                                |                                    | Risk of bias                                    | Indirectness | Inconsistency | Imprecision | Publication bias | pre-test probability of 3% <sup>c</sup> | pre-test probability of 20% <sup>d</sup> | pre-test probability of 50% <sup>e</sup> |                   |
| <b>True positives</b> (patients with VWD)                                  | 2 studies<br>249 patients      | cohort & case-control type studies | serious <sup>a</sup>                            | not serious  | not serious   | not serious | none             | 19 to 25                                | 124 to 164                               | 310 to 410                               | ⊕⊕○○<br>LOW       |
| <b>False negatives</b> (patients incorrectly classified as not having VWD) |                                |                                    |                                                 |              |               |             |                  | 5 to 11                                 | 36 to 76                                 | 90 to 190                                |                   |
| <b>True negatives</b> (patients without VWD)                               | 2 studies<br>513 patients      | cohort & case-control type studies | serious <sup>a</sup>                            | not serious  | not serious   | not serious | none             | 873 to 941                              | 720 to 776                               | 450 to 485                               |                   |
| <b>False positives</b> (patients)                                          |                                |                                    |                                                 |              |               |             |                  | 29 to 97                                | 24 to 80                                 | 15 to 50                                 |                   |

| Outcome                               | No of studies (No of patients) | Study design | Factors that may decrease certainty of evidence |              |               |             |                  | Effect per 1,000 patients tested        |                                          |                                          | Test accuracy CoE |
|---------------------------------------|--------------------------------|--------------|-------------------------------------------------|--------------|---------------|-------------|------------------|-----------------------------------------|------------------------------------------|------------------------------------------|-------------------|
|                                       |                                |              | Risk of bias                                    | Indirectness | Inconsistency | Imprecision | Publication bias | pre-test probability of 3% <sup>c</sup> | pre-test probability of 20% <sup>d</sup> | pre-test probability of 50% <sup>e</sup> |                   |
| incorrectly classified as having VWD) |                                |              |                                                 |              |               |             |                  |                                         |                                          |                                          |                   |

*Explanations*

a. Serious patient selection risk of bias due to case-control design. Diagnostic test accuracy results for classifying type 2 VWD patients (using a 0.6 ratio), not for diagnosing VWD.

c. Typically seen in patients investigated for VWD because of a personal history of abnormal laboratory test (e.g., increased PTT).

d. Typically seen in patients investigated for VWD because of a personal history of bleeding symptoms (e.g., mucocutaneous bleeding). - Quiroga, 2007.

e. Typically seen in patients investigated for VWD as a first degree relative for a patient with VWD.

### 3. Included assays:

| Assay nomenclature                                                                         | Corresponds to: |
|--------------------------------------------------------------------------------------------|-----------------|
| VWF:RCo was measured by using the BC-VWF:Rco                                               | VWF:RCo         |
| VWF:RCo[Agg]                                                                               |                 |
| VWF:RCo aggregometry using the BC von Willebrand Reagent (Siemens Healthcare Diagnostics). |                 |
| HemosIL VWF:RCo, ISTH nomenclature VWF: GPIbR                                              | VWF:GPIbR       |
| VWF:RCo[Acu]                                                                               |                 |
| HemosIL VWF:Rco                                                                            |                 |
| HemosIL AcuStar VWF:Rco                                                                    |                 |
| The INNOVANCE VWF:Ac, ISTH nomenclature VWF:GPIbM                                          | VWF:GPIbM       |
| VWF:act HemosIL LIA                                                                        | VWF:Ab          |
| The HemosIL VWF activity assay (VWF:AC)                                                    |                 |
| VWF:Act HemosIL VWF Activity assay on a STA-R automated coagulometer (Stago)               |                 |
| VWF:Lx activity using HemosIL von Willebrand Factor Activity latex immunoassay kits        |                 |

### 4. Correlation between assays:

| Author        | Year | Pts | Test 1       | Test 2       | Test 3       | Cor 1-2 | Cor 2-3 | Cor 1-3 |
|---------------|------|-----|--------------|--------------|--------------|---------|---------|---------|
| Boender, J    | 2018 | 618 | BC-VWF:Rco   | VWF:GPIbR    | VWF:GPIbM    | 0.957   | 0.984   | 0.959   |
| Szederjesi A  | 2018 | 95  | BC-VWF:Rco   | VWF:GPIbR    | VWF:GPIbM    | 0.963   |         | 0.989   |
| Sagheer, S    | 2016 | 60  | VWF:RCo[Agg] | VWF:GPIbR    | VWF:Ab       | 0.954   |         | 0.938   |
| Favaloro E    | 2016 | 535 | VWF:RCo[Agg] | VWF:GPIbR    | VWF:GPIbM    | 0.928   |         | 0.942   |
| Timm A        | 2015 | 170 | BC-VWF:Rco   | VWF:GPIbR    | VWF:GPIbM    | 0.927   | 0.921   | 0.912   |
| Stitt C       | 2014 | 37  | BC-VWF:Rco   | VWF:GPIbM    |              | 0.989   |         |         |
| Patzke, J     | 2014 | 580 | BC-VWF:Rco   | VWF:GPIbM    |              | 0.99    |         |         |
| Geisen, U     | 2014 | 432 | BC-VWF:Rco   | VWF:GPIbM    |              | 0.96    |         |         |
| Favaloro, E   | 2014 | 600 | BC-VWF:Rco   | VWF:GPIbM    |              | 0.958   |         |         |
| De Maistre    | 2014 | 122 | VWF:RCo[Agg] | VWF:RCo[Acu] | VWF:GPIbM    | 0.977   |         | 0.965   |
| Costa Pinto   | 2014 | 176 | VWF:RCo[Agg] | VWF:RCo[Acu] |              | 0.92    |         |         |
| Verfaillie, C | 2013 | 50  | VWF:GPIbR    | VWF:Ab       | VWF:RCo[Agg] | 0.94    |         | 0.77    |
| Lawrie, A     | 2013 | 180 | BC-VWF:RCo   | VWF:GPIbM    |              | 0.97    |         |         |

|                  |      |     |               |                    |  |       |  |  |
|------------------|------|-----|---------------|--------------------|--|-------|--|--|
| Cabrera, N       | 2013 | 91  | VWF:RCo[Agg]  | VWF:GPIbR          |  | 0.92  |  |  |
| Trossaert, M     | 2011 | 268 | VWF:Ab        | BC-VWF:Rco         |  | 0.89  |  |  |
| Chen, D          | 2011 | 468 | BC-VWF:Rco    | VWF:Ab             |  | 0.93  |  |  |
| Bowyer, A        | 2011 | 53  | VWF:RCo[Agg]  | BC-VWF:Rco         |  | 0.91  |  |  |
| Chen, D          | 2008 | 35  | VWF:Rco [Agg] | VWF:Rco (Flow Cyt) |  | 0.86  |  |  |
| Pinol, M         | 2007 | 127 | VWF:Rco [Agg] | VWF:Ab             |  | 0.956 |  |  |
| Vleeschauwer, A  | 2006 | 148 | VWF:Rco [Agg] | VWF:Ab             |  | 0.84  |  |  |
| Sucker, C        | 2006 | 300 | VWF:Ab        | BC-VWF:Rco         |  | 0.88  |  |  |
| Strandberg, K    | 2006 | 478 | VWF:Rco [Agg] | BC-VWF:Rco         |  | 0.96  |  |  |
| Vanhoorelbeke, K | 2005 | 92  | VWF:Rco [Agg] | VWF:RCo ELISA      |  | 0.963 |  |  |
| Lattuada, A      | 2004 | 95  | VWF:Rco [Agg] | BC-VWF:Rco         |  | 0.61  |  |  |
| Federici, A      | 2004 | 122 | VWF:Rco [Agg] | VWF:RCo ELISA      |  | 0.93  |  |  |

### References

1. I. M. Vangenechten K, Smejkal, P., Zapletal, O., Michiels, J. J., Moore, G. W., Gadisseur, A. A comparative analysis of different automated von Willebrand factor glycoprotein Ib-binding activity assays in well typed von Willebrand disease patients. *J Thromb Haemost* 2018;16:1268–77
2. Boender J, Eikenboom, J., van der Bom, J. G., Meijer, K., de Meris, J., Fijnvandraat, K., Cnossen, M. H., Laros-van Gorkom, B. A. P., van Heerde, W. L., Mauser-Bunschoten, E. P., de Maat, M. P. M., Leebeek, F. W. G. Clinically relevant differences between assays for von Willebrand factor activity. *Journal of Thrombosis and Haemostasis*. 2018;16(12):2413-2424.
3. A. B. Szederjesi L, Budde, U., Castaman, G., Lawrie, A. S., Liu, Y., Montgomery, R., Peyvandi, F., Schneppenheim, R., Varkonyi, A., Patzke, J., Bodo, I. An international collaborative study to compare different von Willebrand factor glycoprotein Ib binding activity assays: the COMPASS-VWF study. 2018.
4. Sagheer S, Rodgers, S., Yacoub, O., Dauer, R., McRae, S., Duncan, E. Comparison of von Willebrand factor (VWF) activity levels determined by HemosIL AcuStar assay and HemosIL LIA assay with ristocetin cofactor assay by aggregometry. *Haemophilia*. 2016;22(3):e200-e207.
5. Favaloro EJ, Mohammed, S. Evaluation of a von Willebrand factor three test panel and chemiluminescent-based assay system for identification of, and therapy monitoring in, von Willebrand disease. *Thrombosis Research*. 2016;141:202-211.
6. Timm A, Hillarp, A., Philips, M., Goetze, J. P. Comparison of automated von Willebrand factor activity assays. *Thrombosis Research*. 2015;135(4):684-691.
7. Reilly-Stitt C, Coppell, J., Mumford, A. D. Discrepancy in von Willebrand factor activity determined by ristocetin cofactor and immunotubidometric assays. *Haemophilia*. 2014;20(4):e341-e344.
8. Patzke J, Budde, U., Huber, A., Mendez, A., Muth, H., Obser, T., Peerschke, E., Wilkens, M., Schneppenheim, R. Performance evaluation and multicentre study of a von Willebrand factor activity assay based on GPIb binding in the absence of ristocetin. *Blood Coagulation and Fibrinolysis*. 2014;25(8):860-870.
9. Geisen U, Zieger, B., Nakamura, L., Weis, A., Heinz, J., Michiels, J. J., Heilmann, C. Comparison of von Willebrand factor (VWF) activity VWF:Ac with VWF ristocetin cofactor activity VWF:RCo. *Thrombosis Research*. 2014;134(2):246-250.
10. Favaloro EJ, Mohammed, S. Towards improved diagnosis of von Willebrand disease: Comparative evaluations of several automated von Willebrand factor antigen and activity assays. *Thrombosis Research*. 2014;134(6):1292-1300.
11. de Maistre E, Volot, F., Mourey, G., Aho, L. S., Ternisien, C., Briquel, M. E., Bertrand, M. A., Tardy, B., Frotscher, B., Nguyen, P., Dumont, L., Vandroux, D., Hezard, N., Trossaert, M. Performance of two new automated assays for measuring von Willebrand activity: HemosIL AcuStar and Innovance. *Thrombosis and Haemostasis*. 2014;112(4):825-830.

12. Costa-Pinto J, Perez-Rodriguez, A., Gomez-del-Castillo, M. D. C., Loures, E., Rodriguez-Trillo, A., Batlle, J., Lopez-Fernandez, M. F. Diagnosis of inherited von Willebrand disease: Comparison of two methodologies and analysis of the discrepancies. *Haemophilia*. 2014;20(4):559-567.
13. Verfaillie CJ, De Witte, E., Devreese, K. M. J. Validation of a new panel of automated chemiluminescence assays for von Willebrand factor antigen and activity in the screening for von Willebrand disease. *International Journal of Laboratory Hematology*. 2013;35(5):555-565.
14. Lawrie AS, Stufano, F., Canciani, M. T., Mackie, I. J., Machin, S. J., Peyvandi, F. A comparative evaluation of a new automated assay for von Willebrand factor activity. *Haemophilia*. 2013;19(2):338-342.
15. Cabrera N, Moret, A., Caunedo, P., Cid, A. R., Vila, V., Espana, F., Aznar, J. A. Comparison of a new chemiluminescent immunoassay for von Willebrand factor activity with the ristocetin cofactor-induced platelet agglutination method. *Haemophilia*. 2013;19(6):920-925.
16. Lasne D, Dey, C., Dautzenberg, M. D., Cherqaoui, Z., Monge, F., Aouba, A., Torchet, M. F., Geloën, D., Landais, P., Rothschild, C. Screening for von Willebrand disease: Contribution of an automated assay for von Willebrand factor activity. *Haemophilia*. 2012;18(3):e158-e163.
17. Trossaert M, Ternisien, C., Lefrancois, A., Llopis, L., Goudemand, J., Sigaud, M., Fouassier, M., Caron, C. Evaluation of an automated von willebrand factor activity assay in von Willebrand disease. *Clinical and Applied Thrombosis/Hemostasis*. 2011;17(6):E25-E29.
18. Chen D, Tange, J. I., Meyers, B. J., Pruthi, R. K., Nichols, W. L., Heit, J. A. Validation of an automated latex particle-enhanced immunoturbidimetric von Willebrand factor activity assay. *Journal of Thrombosis and Haemostasis*. 2011;9(10):1993-2002.
19. Bowyer AE, Shepherd, F., Kitchen, S., Makris, M. A rapid, automated VWF ristocetin cofactor activity assay improves reliability in the diagnosis of von Willebrand disease. *Thrombosis Research*. 2011;127(4):341-344.
20. Chen D, Daigh, C. A., Hendricksen, J. I., Pruthi, R. K., Nichols, W. L., Heit, J. A., Owen, W. G. A highly-sensitive plasma von Willebrand factor ristocetin cofactor (VWF:RCo) activity assay by flow cytometry. *Journal of Thrombosis and Haemostasis*. 2008;6(2):323-330.
21. Salem RO, Van Cott, E. M. A new automated screening assay for the diagnosis of von Willebrand disease. *American Journal of Clinical Pathology*. 2007;127(5):730-735.
22. Pinol M, Sales, M., Costa, M., Tosetto, A., Canciani, M. T., Federici, A. B. Evaluation of a new turbidimetric assay for von Willebrand factor activity useful in the general screening of von Willebrand disease. *Haematologica*. 2007;92(5):712-713.
23. Vleeschauwer AD, Devreese, K. Comparison of a new automated von Willebrand factor activity assay with an aggregation von Willebrand ristocetin cofactor activity assay for the diagnosis of von Willebrand disease. *Blood Coagulation and Fibrinolysis*. 2006;17(5):353-358.
24. Sucker C, Senft, B., Scharf, R. E., Zotz, R. B. Determination of von Willebrand factor activity: Evaluation of the HaemosILTM assay in comparison with established procedures. *Clinical and Applied Thrombosis/Hemostasis*. 2006;12(3):305-310.
25. Strandberg K, Lethagen, S., Andersson, K., Carlson, M., Hillarp, A. Evaluation of a rapid automated assay for analysis of von Willebrand ristocetin cofactor activity. *Clinical and Applied Thrombosis/Hemostasis*. 2006;12(1):61-67.
26. Vanhoorelbeke K, Pareyn, I., Schlamadinger, A., Vauterin, S., Hoylaerts, M. F., Arnout, J., Deckmyn, H. Plasma glyocalicin as a source of GPIIb/IIIa in the von Willebrand factor ristocetin cofactor ELISA. *Thrombosis and Haemostasis*. 2005;93(1):165-171.
27. Redaelli R, Corno, A. R., Borroni, L., Mostarda, G., Nichelatti, M., Morra, E., Baudo, F. Von Willebrand factor ristocetin cofactor (VWF:RCo) assay: Implementation on an automated coagulometer (ACL). *Journal of Thrombosis and Haemostasis*. 2005;3(12):2684-2688.
28. Lattuada A, Preda, L., Sacchi, E., Gallo, L., Federici, A. B., Rossi, E. A rapid assay for ristocetin cofactor activity using an automated coagulometer (ACL 9000). *Blood Coagulation and Fibrinolysis*. 2004;15(6):505-511.
29. Federici AB, Canciani, M. T., Forza, I., Mannucci, P. M., Marchese, P., Ware, J., Ruggeri, Z. M. A sensitive ristocetin co-factor activity assay with recombinant glycoprotein Iba $\alpha$  for the diagnosis of patients with low von Willebrand factor levels. *Haematologica*. 2004;89(1):77-85.
30. Favaloro EJ, Pasalic L, Curnow J. Laboratory tests used to help diagnose von Willebrand disease: an update. *Pathology*. 2016;48(4):303-318. doi:10.1016/j.pathol.2016.03.001
31. Higgins, Andrew J. Goodwin. Automated assays for von Willebrand factor activity Russell A. *Am J Hematol*. 2018;94:496–503.
32. Keesler, DA, Flood, VH. Current issues in diagnosis and treatment of von Willebrand disease. *Res Pract Thromb Haemost*. 2018; 2: 34– 41.

#### Question 4

Should reconsidering the diagnosis vs. removing the diagnosis be used for patients with previously confirmed VWD diagnosis and normalized VWF levels with age?

|                               |                                                                                                                                                                                                                                                                                                                                                                                                                                                                                                                                                                                                                                                                                                                                                                                                                                                                                                                                                                                                         |
|-------------------------------|---------------------------------------------------------------------------------------------------------------------------------------------------------------------------------------------------------------------------------------------------------------------------------------------------------------------------------------------------------------------------------------------------------------------------------------------------------------------------------------------------------------------------------------------------------------------------------------------------------------------------------------------------------------------------------------------------------------------------------------------------------------------------------------------------------------------------------------------------------------------------------------------------------------------------------------------------------------------------------------------------------|
| <b>POPULATION:</b>            | Patients with previously confirmed VWD diagnosis and normalized VWF levels with age                                                                                                                                                                                                                                                                                                                                                                                                                                                                                                                                                                                                                                                                                                                                                                                                                                                                                                                     |
| <b>INTERVENTION:</b>          | reconsidering the diagnosis                                                                                                                                                                                                                                                                                                                                                                                                                                                                                                                                                                                                                                                                                                                                                                                                                                                                                                                                                                             |
| <b>COMPARISON:</b>            | removing the diagnosis                                                                                                                                                                                                                                                                                                                                                                                                                                                                                                                                                                                                                                                                                                                                                                                                                                                                                                                                                                                  |
| <b>MAIN OUTCOMES:</b>         | Age change of VWF:Ag; Frequency of normalization of VWF levels.; Bleeding with normalization of levels; Bleeding score in patients with normalized levels;                                                                                                                                                                                                                                                                                                                                                                                                                                                                                                                                                                                                                                                                                                                                                                                                                                              |
| <b>SETTING:</b>               | Outpatient                                                                                                                                                                                                                                                                                                                                                                                                                                                                                                                                                                                                                                                                                                                                                                                                                                                                                                                                                                                              |
| <b>PERSPECTIVE:</b>           | Clinical recommendation – population perspective                                                                                                                                                                                                                                                                                                                                                                                                                                                                                                                                                                                                                                                                                                                                                                                                                                                                                                                                                        |
| <b>BACKGROUND:</b>            | <p>Multiple variables that affect VWF levels can make a firm diagnosis of VWD difficult. In aggregate, mildly reduced VWF:Ag and VWF:RCO levels do not always establish a diagnosis of VWD; conversely, low normal VWF:Ag and VWF:RCo activity does not always exclude the diagnosis. In addition, although VWF:Ag assays have good precision and reproducibility, the VWF:RCo assay has greater variability, resulting in potential for misdiagnosis and/or misclassification (Bucciarelli, 2013).</p> <p>Data is not available to say that the age increase in VWF is accompanied by a change in symptoms while adjusting for comorbidities and until it can be proved that an increase in VWF levels prevents bleeding, healthcare providers have to be very careful in saying someone does not have VWD or a bleeding disorder. However, data shows that around 43% of previously diagnosed patients have normalized levels with age (Borghi, 2017; Nummi, 2017; Rydz, 2015; Abu Ismail, 2017).</p> |
| <b>CONFLICT OF INTERESTS:</b> | <p>ASH conflict of interest declaration and management policies were applied, and the following panel members were voting panel members (determining the direction and strength of the recommendation): Sandra Haberichter, Jeroen Eikenboom, Barbara Konkle, Robert Sidonio Jr, Simon McRae, Robert Montgomery, James O'Donnell, Claire McLintock, Barbara Ameer, Nicolas Giraud, Nikole Scappe, Vicki Jacobs-Pratt, Paula James, Nathan Connell.</p> <p>No panel members recused as a result of risk of conflicts of interest.</p>                                                                                                                                                                                                                                                                                                                                                                                                                                                                    |

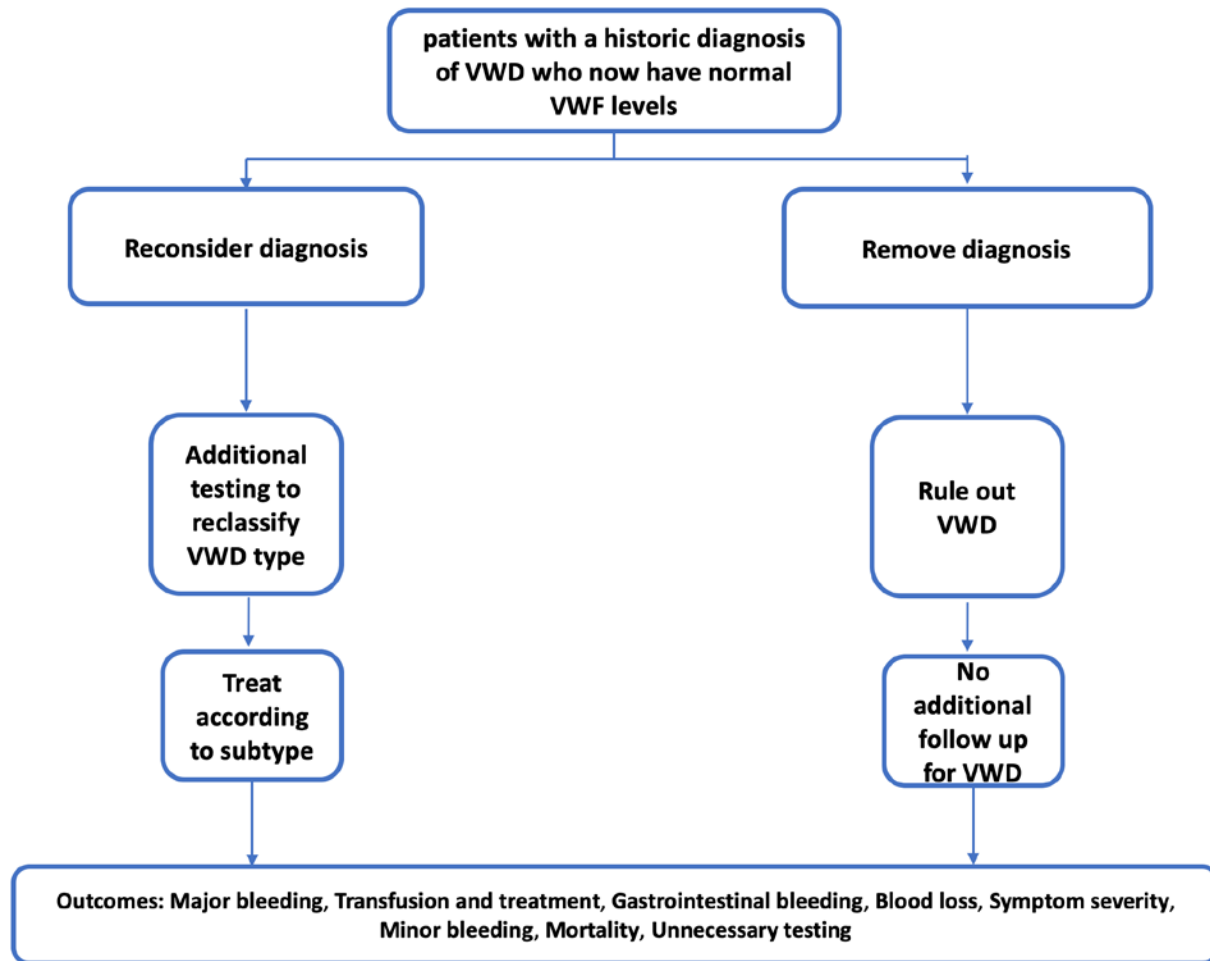

## ASSESSMENT

| Problem                                                                                                                                                                                                         |                                                                                                                                                                                                                                                                                                                                                       |                                                                                                                 |
|-----------------------------------------------------------------------------------------------------------------------------------------------------------------------------------------------------------------|-------------------------------------------------------------------------------------------------------------------------------------------------------------------------------------------------------------------------------------------------------------------------------------------------------------------------------------------------------|-----------------------------------------------------------------------------------------------------------------|
| Is the problem a priority?                                                                                                                                                                                      |                                                                                                                                                                                                                                                                                                                                                       |                                                                                                                 |
| JUDGEMENT                                                                                                                                                                                                       | RESEARCH EVIDENCE                                                                                                                                                                                                                                                                                                                                     | ADDITIONAL CONSIDERATIONS                                                                                       |
| <input type="radio"/> No<br><input type="radio"/> Probably no<br><input type="radio"/> Probably yes<br><input checked="" type="radio"/> Yes<br><input type="radio"/> Varies<br><input type="radio"/> Don't know | <p>Multiple variables that affect VWF levels can make a firm diagnosis of VWD difficult. In aggregate, mildly reduced VWF:Ag and VWF:RCo levels do not always establish a diagnosis of VWD; conversely, low normal VWF:Ag and VWF:RCo activity does not always exclude the diagnosis. In addition, although VWF:Ag assays have good precision and</p> | <p>This question was judged to be a priority among many candidate questions to address in these guidelines.</p> |



|  |                                                                                                                                                                                                                                                                                                                                                                                                                                                                                                                                                                                                                                                   |  |
|--|---------------------------------------------------------------------------------------------------------------------------------------------------------------------------------------------------------------------------------------------------------------------------------------------------------------------------------------------------------------------------------------------------------------------------------------------------------------------------------------------------------------------------------------------------------------------------------------------------------------------------------------------------|--|
|  | <p>reproducibility, the VWF:RCo assay has greater variability, resulting in potential for misdiagnosis and/or misclassification (Bucciarelli, 2013). Data is not available to say that the age increase in VWF is accompanied by a change in symptoms while adjusting for comorbidities and until it can be proved that an increase in VWF levels prevents bleeding, healthcare providers have to be very careful in saying someone does not have VWD or a bleeding disorder. However, data shows that around 43% of previously diagnosed patients have normalized levels with age (Borghi, 2017; Nummi, 2017; Rydz, 2015; Abu Ismail, 2017).</p> |  |
|--|---------------------------------------------------------------------------------------------------------------------------------------------------------------------------------------------------------------------------------------------------------------------------------------------------------------------------------------------------------------------------------------------------------------------------------------------------------------------------------------------------------------------------------------------------------------------------------------------------------------------------------------------------|--|

**Desirable Effects**  
How substantial are the desirable anticipated effects?

| <b>JUDGEMENT</b>                                                                                                                                                                                                                                                                             | <b>RESEARCH EVIDENCE</b>                                                                                                                                                                                                                                                                                                                                                                                                                                                                                                                                                                                                                                                                                                                                                                                                                                                       | <b>ADDITIONAL CONSIDERATIONS</b> |
|----------------------------------------------------------------------------------------------------------------------------------------------------------------------------------------------------------------------------------------------------------------------------------------------|--------------------------------------------------------------------------------------------------------------------------------------------------------------------------------------------------------------------------------------------------------------------------------------------------------------------------------------------------------------------------------------------------------------------------------------------------------------------------------------------------------------------------------------------------------------------------------------------------------------------------------------------------------------------------------------------------------------------------------------------------------------------------------------------------------------------------------------------------------------------------------|----------------------------------|
| <ul style="list-style-type: none"> <li><input type="radio"/> Trivial</li> <li><input type="radio"/> Small</li> <li><input checked="" type="radio"/> Moderate</li> <li><input type="radio"/> Large</li> <li><input type="radio"/> Varies</li> <li><input type="radio"/> Don't know</li> </ul> | <p>Normalization would trigger repeat evaluation for bleeding phenotype and other bleeding disorders, particularly if not previously tested. Degree of normalization may influence the decision as to whether to manage expectantly or prophylactically with minor procedures.</p> <p>When levels normalize, and patients are still bleeding, physicians tend to screen for other bleeding disorders, especially platelet disorders, that usually come out to be negative, so the patients are treated as having VWD, but tranexamic acid is used alone as a common treatment for bleeding disorders and desmopressin is avoided because of cardiovascular comorbidities in the elderly.</p> <p>If the diagnosis is removed, there is a fear of undertreatment - particularly if prior issues with major bleeding.</p> <p>Refer to the Appendix at the end of the document</p> |                                  |

**Undesirable Effects**  
How substantial are the undesirable anticipated effects?

| <b>JUDGEMENT</b> | <b>RESEARCH EVIDENCE</b> | <b>ADDITIONAL CONSIDERATIONS</b> |
|------------------|--------------------------|----------------------------------|
|------------------|--------------------------|----------------------------------|

|                                                                                                                                                           |                                                                                                                                                                                                                                                                                                                                                                                                                                                                                                                                                                                                                                                                                                                                                                                                                                                                                |  |
|-----------------------------------------------------------------------------------------------------------------------------------------------------------|--------------------------------------------------------------------------------------------------------------------------------------------------------------------------------------------------------------------------------------------------------------------------------------------------------------------------------------------------------------------------------------------------------------------------------------------------------------------------------------------------------------------------------------------------------------------------------------------------------------------------------------------------------------------------------------------------------------------------------------------------------------------------------------------------------------------------------------------------------------------------------|--|
| <ul style="list-style-type: none"> <li>○ Large</li> <li>○ Moderate</li> <li>● Small</li> <li>○ Trivial</li> <li>○ Varies</li> <li>○ Don't know</li> </ul> | <p>Normalization would trigger repeat evaluation for bleeding phenotype and other bleeding disorders, particularly if not previously tested. Degree of normalization may influence the decision as to whether to manage expectantly or prophylactically with minor procedures.</p> <p>When levels normalize, and patients are still bleeding, physicians tend to screen for other bleeding disorders, especially platelet disorders, that usually come out to be negative, so the patients are treated as having VWD, but tranexamic acid is used alone as a common treatment for bleeding disorders and desmopressin is avoided because of cardiovascular comorbidities in the elderly.</p> <p>If the diagnosis is removed, there is a fear of undertreatment - particularly if prior issues with major bleeding.</p> <p>Refer to the Appendix at the end of the document</p> |  |
|-----------------------------------------------------------------------------------------------------------------------------------------------------------|--------------------------------------------------------------------------------------------------------------------------------------------------------------------------------------------------------------------------------------------------------------------------------------------------------------------------------------------------------------------------------------------------------------------------------------------------------------------------------------------------------------------------------------------------------------------------------------------------------------------------------------------------------------------------------------------------------------------------------------------------------------------------------------------------------------------------------------------------------------------------------|--|

**Certainty of evidence**  
What is the overall certainty of the evidence of effects?

| <b>JUDGEMENT</b>                                                                                                                               | <b>RESEARCH EVIDENCE</b>                                                                                                                                                                                                                                                                                                                                                                                                                                                                                                                                                                                                     | <b>ADDITIONAL CONSIDERATIONS</b>                                                                                                                                                                                                                                                                                           |
|------------------------------------------------------------------------------------------------------------------------------------------------|------------------------------------------------------------------------------------------------------------------------------------------------------------------------------------------------------------------------------------------------------------------------------------------------------------------------------------------------------------------------------------------------------------------------------------------------------------------------------------------------------------------------------------------------------------------------------------------------------------------------------|----------------------------------------------------------------------------------------------------------------------------------------------------------------------------------------------------------------------------------------------------------------------------------------------------------------------------|
| <ul style="list-style-type: none"> <li>● Very low</li> <li>○ Low</li> <li>○ Moderate</li> <li>○ High</li> <li>○ No included studies</li> </ul> | <p>One important factor that should be considered is the ability to perform VWF:RCo better. VWF:Ag is much more consistent from center to center and is more consistent over time although age seems to affect levels over time. Gill et al 1988 published a cross-sectional study with blood donors and showed 1U/dL/per year increase in levels between age 20 to age 60 as a cross-sectional study suggesting the change in level with age, and another Zimmerman study in children showed the same results as a cross-sectional study, which shows that the increase in level is not likely due to the assay itself.</p> | <p>Potential unintended consequences of keeping the diagnosis include patients who may be denied necessary procedures due to concern over bleeding risk: physicians are willing to consider the use of antiplatelet therapy, cardiologists are willing to consider interventions based on the patients' VWD diagnosis.</p> |

**Values**  
Is there important uncertainty about or variability in how much people value the main outcomes?

| <b>JUDGEMENT</b>                                                                                                                                                                                              | <b>RESEARCH EVIDENCE</b> | <b>ADDITIONAL CONSIDERATIONS</b>                                                                                                                                                                                                                                               |
|---------------------------------------------------------------------------------------------------------------------------------------------------------------------------------------------------------------|--------------------------|--------------------------------------------------------------------------------------------------------------------------------------------------------------------------------------------------------------------------------------------------------------------------------|
| <ul style="list-style-type: none"> <li>○ Important uncertainty or variability</li> <li>● Possibly important uncertainty or variability</li> <li>○ Probably no important uncertainty or variability</li> </ul> |                          | <p>Patients with a bleeding history will value a clear diagnosis, but they also want it to be accurate, so patients will differ in reaction to developing normal levels – liberation versus loss. Patients have a concern in having their diagnosis removed due to fear of</p> |

o No important uncertainty or variability

undertreatment - particularly if prior issues with major bleeding. Diagnosis can bring a sense of meaning and belonging as well as 'illness'. Removing the diagnosis may limit access to timely care and create confusion for patients and medical staff regarding the appropriate treatment. So, it can be very distressing to a patient/family to have their diagnosis removed, especially if they are involved in patient advocacy groups. Female patients may be confused about how a genetic disorder can be cured at a time that it was considered to be incurable, especially when levels are normal, but they are still experiencing gynecological bleeding symptoms.

On the other hand, for patients who are athletes or want to go into the military are often very relieved to have a diagnosis removed.

For some individuals, it takes years to get a diagnosis. For those patients, a diagnosis gives their symptoms and experiences validity in the world. Prior to a diagnosis, a patient may experience skepticism and even discrimination in the workplace, for example, if they were not believed that they had a legitimate medical basis for time out of work or needing more time to complete a project. The changing insurance environment makes patients continually re-evaluate the upside and downside of their diagnosis. Some patients feel very strongly about their diagnosis as they've often had to go through a lengthy process. Taking away a diagnosis sometimes puts the availability of treatment options (for any bleeding disorder) at risk.

Patients are usually told to call their healthcare provider if they develop future bleeding

|  |  |                                                                                                                                                                                                                                                                                             |
|--|--|---------------------------------------------------------------------------------------------------------------------------------------------------------------------------------------------------------------------------------------------------------------------------------------------|
|  |  | symptoms and they rarely come back and get retested with newer testing. This happens often when those with low VWF:RCo due to benign variants like (hetero or homozygotes) D1472H SNPs were identified and were found to have low VWF:RCo (regent artifact) but normal VWF:CB or VWF:GPIbM. |
|--|--|---------------------------------------------------------------------------------------------------------------------------------------------------------------------------------------------------------------------------------------------------------------------------------------------|

**Balance of effects**  
Does the balance between desirable and undesirable effects favor the intervention or the comparison?

| JUDGEMENT                                                                                                                                                                                                                                                                                                      | RESEARCH EVIDENCE                                | ADDITIONAL CONSIDERATIONS                                                                                                                                                                                                                                                                                                                                                                                                                                                        |
|----------------------------------------------------------------------------------------------------------------------------------------------------------------------------------------------------------------------------------------------------------------------------------------------------------------|--------------------------------------------------|----------------------------------------------------------------------------------------------------------------------------------------------------------------------------------------------------------------------------------------------------------------------------------------------------------------------------------------------------------------------------------------------------------------------------------------------------------------------------------|
| <ul style="list-style-type: none"> <li>○ Favors the comparison</li> <li>○ Probably favors the comparison</li> <li>○ Does not favor either the intervention or the comparison</li> <li>● Probably favors the intervention</li> <li>○ Favors the intervention</li> <li>○ Varies</li> <li>○ Don't know</li> </ul> | Refer to the Appendix at the end of the document | Patients are often reassured when a specific name is given to their disease (i.e., they prefer "I have VWD" rather than "I have bleeding from an undetermined cause"). Patients may prefer the 'safety' of treatment over no treatment when the diagnosis is removed. Removal may increase anxiety about bleeding with the next intervention or procedure. The former diagnosis may have been embedded in the personality of the patient, so the patient may lose this identity. |

**Resources required**  
How large are the resource requirements (costs)?

| JUDGEMENT                                                                                                                                                                                                                      | RESEARCH EVIDENCE                                                                                                                                                                                                                                                                                                                                                 | ADDITIONAL CONSIDERATIONS |
|--------------------------------------------------------------------------------------------------------------------------------------------------------------------------------------------------------------------------------|-------------------------------------------------------------------------------------------------------------------------------------------------------------------------------------------------------------------------------------------------------------------------------------------------------------------------------------------------------------------|---------------------------|
| <ul style="list-style-type: none"> <li>○ Large costs</li> <li>○ Moderate costs</li> <li>● Negligible costs and savings</li> <li>○ Moderate savings</li> <li>○ Large savings</li> <li>○ Varies</li> <li>○ Don't know</li> </ul> | No resource required to reconsidering or removing the diagnosis, except the time to have a complicated discussion about removing a diagnosis. Although reconsidering the diagnosis will require time for the patient to be reassessed and resources for additional lab tests, removing the diagnosis would require significant time for a complicated discussion. |                           |

**Certainty of evidence of required resources**  
What is the certainty of the evidence of resource requirements (costs)?

| JUDGEMENT                                                                                                                                      | RESEARCH EVIDENCE                                                                                                                                    | ADDITIONAL CONSIDERATIONS |
|------------------------------------------------------------------------------------------------------------------------------------------------|------------------------------------------------------------------------------------------------------------------------------------------------------|---------------------------|
| <ul style="list-style-type: none"> <li>○ Very low</li> <li>○ Low</li> <li>○ Moderate</li> <li>○ High</li> <li>● No included studies</li> </ul> | <p>No resource required to reconsidering or removing the diagnosis, except the time to have a complicated discussion about removing a diagnosis.</p> |                           |

**Cost effectiveness**  
Does the cost-effectiveness of the intervention favor the intervention or the comparison?

| JUDGEMENT                                                                                                                                                                                                                                                                                                               | RESEARCH EVIDENCE                                                                                                                                    | ADDITIONAL CONSIDERATIONS |
|-------------------------------------------------------------------------------------------------------------------------------------------------------------------------------------------------------------------------------------------------------------------------------------------------------------------------|------------------------------------------------------------------------------------------------------------------------------------------------------|---------------------------|
| <ul style="list-style-type: none"> <li>○ Favors the comparison</li> <li>○ Probably favors the comparison</li> <li>○ Does not favor either the intervention or the comparison</li> <li>○ Probably favors the intervention</li> <li>○ Favors the intervention</li> <li>○ Varies</li> <li>● No included studies</li> </ul> | <p>No resource required to reconsidering or removing the diagnosis, except the time to have a complicated discussion about removing a diagnosis.</p> |                           |

**Equity**  
What would be the impact on health equity?

| JUDGEMENT                                                                                                                                                                                                        | RESEARCH EVIDENCE | ADDITIONAL CONSIDERATIONS                                                                                                                                                                                                                                                                                                                                                   |
|------------------------------------------------------------------------------------------------------------------------------------------------------------------------------------------------------------------|-------------------|-----------------------------------------------------------------------------------------------------------------------------------------------------------------------------------------------------------------------------------------------------------------------------------------------------------------------------------------------------------------------------|
| <ul style="list-style-type: none"> <li>○ Reduced</li> <li>○ Probably reduced</li> <li>○ Probably no impact</li> <li>● Probably increased</li> <li>○ Increased</li> <li>○ Varies</li> <li>○ Don't know</li> </ul> |                   | <p>Removing the diagnosis may affect insurance coverage, however, this is a geographic-specific issue. For instance, insurance coverage would not be affected in Australia, the United Kingdom, the Netherlands, or Canada. In fact, as long as the consequence of removing the diagnosis is that no longer treatment is provided by expensive factor concentrates, the</p> |

|  |  |                                                                                                                                                                                                                                                                                                                                                                                                                                                                                                                                                                                                                                                                                                                                                                                                                                                                                                                                                                                                                                                                                                                                                                                                               |
|--|--|---------------------------------------------------------------------------------------------------------------------------------------------------------------------------------------------------------------------------------------------------------------------------------------------------------------------------------------------------------------------------------------------------------------------------------------------------------------------------------------------------------------------------------------------------------------------------------------------------------------------------------------------------------------------------------------------------------------------------------------------------------------------------------------------------------------------------------------------------------------------------------------------------------------------------------------------------------------------------------------------------------------------------------------------------------------------------------------------------------------------------------------------------------------------------------------------------------------|
|  |  | <p>insurance coverage would not change, however for coverage of those concentrates a diagnosis is required.</p> <p>In the USA on the other hand, removing the diagnosis might help reduce insurance premiums - but if the patient has a bleeding phenotype with a VWF level of 40, then removing the diagnosis means the patient might not get funding for treatment. Specifically, if the patient uses intranasal desmopressin, removing the diagnosis could affect coverage of this medication, and the same applies for patients with "low VWF" who may only need small amounts of antifibrinolytics; getting coverage for that is tough outside of a 340B center.. Otherwise, the diagnosis of VWD is usually changed to Bleeding of Unknown Cause if the patient still has a bleeding phenotype (i.e. increased BAT score), which will not lead to any change in insurance coverage but can sometimes prevent patients from getting DDAVP.</p> <p>Patients with borderline levels who rely on funding for treatment costs to be covered could be more disadvantaged. On the other hand, removing the diagnosis is likely to disproportionately affect those patients without good primary insurance.</p> |
|--|--|---------------------------------------------------------------------------------------------------------------------------------------------------------------------------------------------------------------------------------------------------------------------------------------------------------------------------------------------------------------------------------------------------------------------------------------------------------------------------------------------------------------------------------------------------------------------------------------------------------------------------------------------------------------------------------------------------------------------------------------------------------------------------------------------------------------------------------------------------------------------------------------------------------------------------------------------------------------------------------------------------------------------------------------------------------------------------------------------------------------------------------------------------------------------------------------------------------------|

**Acceptability**  
Is the intervention acceptable to key stakeholders?

| <b>JUDGEMENT</b>                                                                                                                                                                                                                                                                                | <b>RESEARCH EVIDENCE</b> | <b>ADDITIONAL CONSIDERATIONS</b>                                                                                                                                                                                                                                   |
|-------------------------------------------------------------------------------------------------------------------------------------------------------------------------------------------------------------------------------------------------------------------------------------------------|--------------------------|--------------------------------------------------------------------------------------------------------------------------------------------------------------------------------------------------------------------------------------------------------------------|
| <ul style="list-style-type: none"> <li><input type="radio"/> No</li> <li><input type="radio"/> Probably no</li> <li><input type="radio"/> Probably yes</li> <li><input checked="" type="radio"/> Yes</li> <li><input type="radio"/> Varies</li> <li><input type="radio"/> Don't know</li> </ul> |                          | <p>Patients often do not accept having their diagnosis removed, but their reaction is highly variable. For example, a patient who has a bleeding history may be reluctant, while a patient who carries the diagnosis, but has never had bleeding may not care.</p> |

|  |  |                                                                                                                                                                                                                                                                                                                                                                                                                                                                                                                                                                                                                                                                                                                                                                                      |
|--|--|--------------------------------------------------------------------------------------------------------------------------------------------------------------------------------------------------------------------------------------------------------------------------------------------------------------------------------------------------------------------------------------------------------------------------------------------------------------------------------------------------------------------------------------------------------------------------------------------------------------------------------------------------------------------------------------------------------------------------------------------------------------------------------------|
|  |  | <p>A change in terminology i.e. from VWD to alternative terms such as normalized VWD may be accepted more than just a simple removal of the diagnosis. Additionally, the patient would need to know that levels are now increased to the normal range but the impact on bleeding is uncertain.</p> <p>Having said that, the provided information should be based on patient values and can be a key determiner in driving acceptability: a thoughtful and non-rushed discussion, usually in person, and an expert needs to have reviewed all the labs on different timeframes (was a lab normal because of post-Stimate, OCP, pregnancy, etc), followed by several visits to help the patient accept the diagnosis removal knowing they can always reach out if anything changes</p> |
|--|--|--------------------------------------------------------------------------------------------------------------------------------------------------------------------------------------------------------------------------------------------------------------------------------------------------------------------------------------------------------------------------------------------------------------------------------------------------------------------------------------------------------------------------------------------------------------------------------------------------------------------------------------------------------------------------------------------------------------------------------------------------------------------------------------|

**Feasibility**  
Is the intervention feasible to implement?

| <b>JUDGEMENT</b>                                                                                                                                                                                                                                                                                | <b>RESEARCH EVIDENCE</b> | <b>ADDITIONAL CONSIDERATIONS</b>                                                                                                                                                                                                                                                                                                                                                                                                                                                                                                                                                                                                                                                                                                                    |
|-------------------------------------------------------------------------------------------------------------------------------------------------------------------------------------------------------------------------------------------------------------------------------------------------|--------------------------|-----------------------------------------------------------------------------------------------------------------------------------------------------------------------------------------------------------------------------------------------------------------------------------------------------------------------------------------------------------------------------------------------------------------------------------------------------------------------------------------------------------------------------------------------------------------------------------------------------------------------------------------------------------------------------------------------------------------------------------------------------|
| <ul style="list-style-type: none"> <li><input type="radio"/> No</li> <li><input type="radio"/> Probably no</li> <li><input type="radio"/> Probably yes</li> <li><input checked="" type="radio"/> Yes</li> <li><input type="radio"/> Varies</li> <li><input type="radio"/> Don't know</li> </ul> |                          | <p>It is feasible to have a longitudinal study that provides data about patients' VWF levels given the expertise in the bleeding disorders community, with a need for multicenter collaboration and the right setting (e.g. the Zimmerman project), which requires significant resources. The study would have to be a very long one because although the changes are real, they are small on a year to year basis, and there are other factors that can affect variability in VWF levels. In fact, without the data, there may be incorrect assumptions about the causes/effects of late in life VWF level changes. This study could help uncover why the change is not in all patients. Patients would actually want to be tracked long term,</p> |

|  |  |                                                                                                                                                                                                                                                                                                                                                                                                                                                                                                                                                                                                                                                                                                                                                                                                                                                                                                                                                                                                                                                                                                                                                                                                                                                                                        |
|--|--|----------------------------------------------------------------------------------------------------------------------------------------------------------------------------------------------------------------------------------------------------------------------------------------------------------------------------------------------------------------------------------------------------------------------------------------------------------------------------------------------------------------------------------------------------------------------------------------------------------------------------------------------------------------------------------------------------------------------------------------------------------------------------------------------------------------------------------------------------------------------------------------------------------------------------------------------------------------------------------------------------------------------------------------------------------------------------------------------------------------------------------------------------------------------------------------------------------------------------------------------------------------------------------------|
|  |  | <p>to be confident that the disease is no longer active. They might need to be convinced that a disease they had their entire life, no longer exists.</p> <p>Understanding the changes in the lab platforms and methodology is important and some studies showing higher VWF levels may be due to poorer testing quality years ago compared to now. Also, in places like Ireland testing is in the same national lab, compared to the US where they may have testing in multiple different locations which can lead to less easy results to interpret.</p> <p>Removing the diagnosis means that hemophilia treatment centers may no longer have the ability to study those patients, and elderly patients might have delays in getting surgical procedures if they aren't diagnosed.</p> <p>Pragmatically, it is feasible to remove the diagnosis if the VWF levels are normal and there is no reason for false positive. So, the question remains whether normalization of levels results in lesser bleeding complications. Studies addressing this question are urgently needed while being careful to remove the diagnosis, as VWF levels may fluctuate and have a high biological variation. Furthermore, patients at higher age do have a higher risk of bleeding in general.</p> |
|--|--|----------------------------------------------------------------------------------------------------------------------------------------------------------------------------------------------------------------------------------------------------------------------------------------------------------------------------------------------------------------------------------------------------------------------------------------------------------------------------------------------------------------------------------------------------------------------------------------------------------------------------------------------------------------------------------------------------------------------------------------------------------------------------------------------------------------------------------------------------------------------------------------------------------------------------------------------------------------------------------------------------------------------------------------------------------------------------------------------------------------------------------------------------------------------------------------------------------------------------------------------------------------------------------------|

**SUMMARY OF JUDGEMENTS**

|                            | JUDGEMENT |             |                 |            |  |        |            |
|----------------------------|-----------|-------------|-----------------|------------|--|--------|------------|
| <b>PROBLEM</b>             | No        | Probably no | Probably yes    | <b>Yes</b> |  | Varies | Don't know |
| <b>DESIRABLE EFFECTS</b>   | Trivial   | Small       | <b>Moderate</b> | Large      |  | Varies | Don't know |
| <b>UNDESIRABLE EFFECTS</b> | Large     | Moderate    | <b>Small</b>    | Trivial    |  | Varies | Don't know |



|                                             | JUDGEMENT                            |                                                      |                                                          |                                         |                         |        |                            |
|---------------------------------------------|--------------------------------------|------------------------------------------------------|----------------------------------------------------------|-----------------------------------------|-------------------------|--------|----------------------------|
| CERTAINTY OF EVIDENCE                       | Very low                             | Low                                                  | Moderate                                                 | High                                    |                         |        | No included studies        |
| VALUES                                      | Important uncertainty or variability | <b>Possibly important uncertainty or variability</b> | Probably no important uncertainty or variability         | No important uncertainty or variability |                         |        |                            |
| BALANCE OF EFFECTS                          | Favors the comparison                | Probably favors the comparison                       | Does not favor either the intervention or the comparison | <b>Probably favors the intervention</b> | Favors the intervention | Varies | Don't know                 |
| RESOURCES REQUIRED                          | Large costs                          | Moderate costs                                       | <b>Negligible costs and savings</b>                      | Moderate savings                        | Large savings           | Varies | Don't know                 |
| CERTAINTY OF EVIDENCE OF REQUIRED RESOURCES | Very low                             | Low                                                  | Moderate                                                 | High                                    |                         |        | <b>No included studies</b> |
| COST EFFECTIVENESS                          | Favors the comparison                | Probably favors the comparison                       | Does not favor either the intervention or the comparison | Probably favors the intervention        | Favors the intervention | Varies | <b>No included studies</b> |
| EQUITY                                      | Reduced                              | Probably reduced                                     | Probably no impact                                       | <b>Probably increased</b>               | Increased               | Varies | Don't know                 |
| ACCEPTABILITY                               | No                                   | Probably no                                          | Probably yes                                             | <b>Yes</b>                              |                         | Varies | Don't know                 |
| FEASIBILITY                                 | No                                   | Probably no                                          | Probably yes                                             | <b>Yes</b>                              |                         | Varies | Don't know                 |

#### TYPE OF RECOMMENDATION

|                                                         |                                                              |                                                                                   |                                                                 |                                                     |
|---------------------------------------------------------|--------------------------------------------------------------|-----------------------------------------------------------------------------------|-----------------------------------------------------------------|-----------------------------------------------------|
| Strong recommendation against the intervention<br><br>○ | Conditional recommendation against the intervention<br><br>○ | Conditional recommendation for either the intervention or the comparison<br><br>○ | <b>Conditional recommendation for the intervention</b><br><br>● | Strong recommendation for the intervention<br><br>○ |
|---------------------------------------------------------|--------------------------------------------------------------|-----------------------------------------------------------------------------------|-----------------------------------------------------------------|-----------------------------------------------------|

## CONCLUSIONS

### Recommendation

The panel suggests reconsidering the diagnosis as opposed to removing the diagnosis in patients with previously confirmed VWD who now have VWF levels that have normalized with age.

(Conditional recommendation based on very low certainty in the evidence)

### Remarks:

- Aging and comorbidities are known to increase VWF levels. However, the association between the increased VWF levels and bleeding symptoms is not established.
- Decisions about reconsidering or removing the diagnosis should consider the patient's values and preferences and be informed by a shared-decision making process.

### Justification

The guideline panel determined that there is low certainty in the evidence for a net health benefit from reconsidering the diagnosis of VWD versus simply removing the disease in patients with normalized VWF with age. Other EtD criteria were generally in favor of reconsidering the diagnosis so that the desirable consequences were greater than the undesirable consequences.

### Subgroup considerations

### Implementation considerations

### Monitoring and evaluation

### Research priorities

- Longitudinal studies correlating normal levels with bleeding, while adjusting for co-morbidities

## APPENDIX

### 1. Risk of Bias:

| Author, year      | Study Participation | Study Attrition | Prognostic Factor Measurement <sup>a</sup> | Outcome Measurement <sup>a</sup> | Study Confounding <sup>b</sup> | Statistical Analysis and Reporting |
|-------------------|---------------------|-----------------|--------------------------------------------|----------------------------------|--------------------------------|------------------------------------|
| Sanders, 2014     | Low                 | Low             | High                                       | Low                              | Low                            | Low                                |
| Borghi, 2017      | Low                 | Low             | High                                       | Low                              | High                           | Low                                |
| Nummi, 2017       | Low                 | Low             | High                                       | Low                              | High                           | Low                                |
| Lavin, 2017       | Low                 | Low             | High                                       | Low                              | High                           | Low                                |
| Rydz, 2015        | Moderate            | Low             | High                                       | Low                              | High                           | Low                                |
| Abou-Ismaïl, 2017 | Low                 | Low             | High                                       | Low                              | High                           | Low                                |

a. Bleeding symptoms not measured in patients with normalized levels

b. Study confounding high in studies that did not adjust for comorbidities while measuring the outcome of interest

### 2. Outcomes:

| Certainty assessment |              |              |               |              |             |                      | Impact | Certainty |
|----------------------|--------------|--------------|---------------|--------------|-------------|----------------------|--------|-----------|
| No of studies        | Study design | Risk of bias | Inconsistency | Indirectness | Imprecision | Other considerations |        |           |

Age change of VWF:Ag

| Certainty assessment |                       |                      |                      |                      |             |                      | Impact                                                                                                                                                                                                 | Certainty        |
|----------------------|-----------------------|----------------------|----------------------|----------------------|-------------|----------------------|--------------------------------------------------------------------------------------------------------------------------------------------------------------------------------------------------------|------------------|
| No of studies        | Study design          | Risk of bias         | Inconsistency        | Indirectness         | Imprecision | Other considerations |                                                                                                                                                                                                        |                  |
| 5                    | observational studies | serious <sup>a</sup> | serious <sup>b</sup> | serious <sup>c</sup> | not serious | none                 | 5 studies with 1142 patients report the change in VWF levels longitudinally (follow-up between 1 and 10 years). The mean change in VWF is 7.9 IU/dL/decade, ranging between 3.0 and 24.0 IU/dL/decade. | ⊕○○○<br>VERY LOW |

#### Frequency of normalization of VWF levels.

|   |                       |                      |                      |                      |             |      |                                                                                                                                                                                                           |                  |
|---|-----------------------|----------------------|----------------------|----------------------|-------------|------|-----------------------------------------------------------------------------------------------------------------------------------------------------------------------------------------------------------|------------------|
| 4 | observational studies | serious <sup>a</sup> | serious <sup>d</sup> | serious <sup>c</sup> | not serious | none | 4 studies with 435 patients report the normalization of VWF levels over a period of 1-10 years. The number of patients with normalized levels ranged between 25% and 60%, with a weighted average of 43%. | ⊕○○○<br>VERY LOW |
|---|-----------------------|----------------------|----------------------|----------------------|-------------|------|-----------------------------------------------------------------------------------------------------------------------------------------------------------------------------------------------------------|------------------|

#### Bleeding with normalization of levels

|   |                       |             |             |             |             |      |                                                                                                                                                                                                                                                                                                                                                                                                                                                                                                                                                                                                                                                                                                                                                                                                                                                                           |             |
|---|-----------------------|-------------|-------------|-------------|-------------|------|---------------------------------------------------------------------------------------------------------------------------------------------------------------------------------------------------------------------------------------------------------------------------------------------------------------------------------------------------------------------------------------------------------------------------------------------------------------------------------------------------------------------------------------------------------------------------------------------------------------------------------------------------------------------------------------------------------------------------------------------------------------------------------------------------------------------------------------------------------------------------|-------------|
| 1 | observational studies | not serious | not serious | not serious | not serious | none | Binary logistic regression analysis with bleeding in the year prior to inclusion in the WiN study as dependent variable. After adjusting for age, sex, BMI and presence of any relevant comorbidities (hypertension, cancer, diabetes and thyroid dysfunction), normalization of VWF levels above 0.50 was still not associated with the incidence of bleeding requiring treatment in the year prior to inclusion in the study: Odds ratio=1.26 (95%CI 0.72-2.21), p=0.414. We can conclude that even after taking other important factors that influence VWF levels and bleeding into account, normalization of VWF levels is not associated with less incidence of bleeding episodes requiring hemostatic treatment. 27% of patients with normalized levels had bleeding symptoms at the time of the study, 21% of patients with abnormal levels had bleeding symptoms. | ⊕⊕○○<br>LOW |
|---|-----------------------|-------------|-------------|-------------|-------------|------|---------------------------------------------------------------------------------------------------------------------------------------------------------------------------------------------------------------------------------------------------------------------------------------------------------------------------------------------------------------------------------------------------------------------------------------------------------------------------------------------------------------------------------------------------------------------------------------------------------------------------------------------------------------------------------------------------------------------------------------------------------------------------------------------------------------------------------------------------------------------------|-------------|

#### Bleeding score in patients with normalized levels

| Certainty assessment |                       |                      |               |                      |             |                      | Impact                                                                                                                                                                                                                                                                                                                                                                                                                                                                                                                                                                                                               | Certainty        |
|----------------------|-----------------------|----------------------|---------------|----------------------|-------------|----------------------|----------------------------------------------------------------------------------------------------------------------------------------------------------------------------------------------------------------------------------------------------------------------------------------------------------------------------------------------------------------------------------------------------------------------------------------------------------------------------------------------------------------------------------------------------------------------------------------------------------------------|------------------|
| No of studies        | Study design          | Risk of bias         | Inconsistency | Indirectness         | Imprecision | Other considerations |                                                                                                                                                                                                                                                                                                                                                                                                                                                                                                                                                                                                                      |                  |
| 2                    | observational studies | serious <sup>a</sup> | not serious   | serious <sup>e</sup> | not serious | none                 | Nummi, 2017 showed that the mean BS in patients with diagnosis confirmed ranged between 10 and 24. Mean BS in patients with Low VWF diagnosis and those that have normal VWF levels was 6. Including all patients with historical VWD, BS showed weak and negative correlation with VWF:RCo (r = 0.43), VWF:Ag (r = 0.51), VWF:CB (r = 0.54), FVIII (r = 0.44), RIPA 0.6 mg/mL (r = 0.34), and RIPA 0.8 mg/ mL (r = 0.54) and positive correlation with PFA C/EPI (r = 0.45) and C/ ADP (r = 0.46) (in all P ≤ 0.001). Sanders, 2014 showed that bleeding score did not differ between elderly and younger patients. | ⊕○○○<br>VERY LOW |

CI: Confidence interval

*Explanations*

- a. Serious study confounding, as the studies have not adjusted for co-morbidities, except for Sanders, 2014 where more elderly patients reported one or more co-morbidities than younger ones, including Diabetes, cancer, cardiovascular disease and depression. Atiq , 2018 showed that comorbidities are associated with higher VWF and FVIII levels in type 1 VWD and may explain the age-related increase of VWF and FVIII levels.
- b. The change of VWF levels varies between 3.0 IU/dL per decade and 24 IU/dL per decade, leading to serious inconsistency.
- c. Although the change in VWF levels is presented, the bleeding symptoms of patients with normalized levels is not reported in the studies,
- d. The normalization of VWF levels varies between 25% and 60%, leading to serious inconsistency.
- e. The bleeding score does not predict the bleeding symptoms in patients in normal VWF but inform on the bleeding history in those patients

**References:**

1. Nummi V, Lassila, R., Joutsu-Korhonen, L., Armstrong, E., Szanto, T. Comprehensive re-evaluation of historical von Willebrand disease diagnosis in association with whole blood platelet aggregation and function. *Int J Lab Hematol.* 2018;40(3):304-311.
2. Abou-Ismaïl MY, Ogunbayo, G. O., Secic, M., Kouides, P. A. Outgrowing the laboratory diagnosis of type 1 von Willebrand disease: A two decade study. *Am J Hematol.* 2018;93(2):232-237.
3. U. N. C. Goettl D, Kowalski, D., Maria, S., Limperger, V. E., Kenet, G. Reclassification of pre-diagnosed von-willebrand disease in the elderly: A hospital-based cohort study. 2017.
4. Lavin M, Aguila, S., Schneppenheim, S., Dalton, N., Jones, K. L., O'Sullivan, J. M., O'Connell, N. M., Ryan, K., White, B., Byrne, M., Rafferty, M., Doyle, M. M., Nolan, M., Preston, R. J. S., Budde, U., James, P., Di Paola, J., O'Donnell, J. S. Novel insights into the clinical phenotype and pathophysiology underlying low VWF levels. *Blood.* 2017;130(21):2344-2353.
5. Borghi M, Guglielmini, G., Mezzasoma, A. M., Falcinelli, E., Bury, L., Malvestiti, M., Gresele, P. Increase of von Willebrand factor with aging in type 1 von Willebrand disease: fact or fiction? *Haematologica.* 2017;102(11):e431-e433.
6. Rydz N, Grabell, J., Lillicrap, D., James, P. D. Changes in von Willebrand factor level and von Willebrand activity with age in type 1 von Willebrand disease. *Haemophilia.* 2015;21(5):636-641.
7. Sanders YV, Giezenaar, M. A., Laros-van Gorkom, B. A., Meijer, K., van der Bom, J. G., Cnossen, M. H., Nijziel, M. R., Ypma, P. F., Fijnvandraat, K., Eikenboom, J., Mauser-Bunschoten, E. P., Leebeek, F. W., Wi, N. study group. von Willebrand disease and aging: an evolving phenotype. *J Thromb Haemost.* 2014;12(7):1066-1075.

## Question 5

| Should VWF factor <30 IU/dL vs. VWF factor <50 IU/dL be used for diagnosing von Willebrand disease type 1? |                                                                                                                                                                                                                                                                                                                                                                                                                                                                                                                                                                                                                                                                                                                                                                                                             |
|------------------------------------------------------------------------------------------------------------|-------------------------------------------------------------------------------------------------------------------------------------------------------------------------------------------------------------------------------------------------------------------------------------------------------------------------------------------------------------------------------------------------------------------------------------------------------------------------------------------------------------------------------------------------------------------------------------------------------------------------------------------------------------------------------------------------------------------------------------------------------------------------------------------------------------|
| <b>POPULATION:</b>                                                                                         | Patients suspected of von Willebrand Disease type 1                                                                                                                                                                                                                                                                                                                                                                                                                                                                                                                                                                                                                                                                                                                                                         |
| <b>INTERVENTION:</b>                                                                                       | VWF factor <30 IU/dL                                                                                                                                                                                                                                                                                                                                                                                                                                                                                                                                                                                                                                                                                                                                                                                        |
| <b>COMPARISON:</b>                                                                                         | VWF factor <50 IU/dL                                                                                                                                                                                                                                                                                                                                                                                                                                                                                                                                                                                                                                                                                                                                                                                        |
| <b>MAIN OUTCOMES:</b>                                                                                      | Mutation detection; Likelihood ratios (LRs) of von Willebrand disease (VWD) ; VWF level and Bleeding score correlation; Bleeding tendency;                                                                                                                                                                                                                                                                                                                                                                                                                                                                                                                                                                                                                                                                  |
| <b>SETTING:</b>                                                                                            | Outpatient                                                                                                                                                                                                                                                                                                                                                                                                                                                                                                                                                                                                                                                                                                                                                                                                  |
| <b>PERSPECTIVE:</b>                                                                                        | Clinical recommendation – population perspective                                                                                                                                                                                                                                                                                                                                                                                                                                                                                                                                                                                                                                                                                                                                                            |
| <b>BACKGROUND:</b>                                                                                         | <p>Von Willebrand disease (VWD) is the most common inherited bleeding disorder known in humans: while estimated to affect between 0.1 and 1% of the general population, many are never diagnosed. VWD diagnosis and classification require numerous laboratory tests. Type 1 vWD is frequently difficult to be diagnosed because of the limitations in laboratory diagnostic tests as well as overlapping nonspecific mild bleeding symptoms between healthy individuals and vWD patients (Pathare, 2018).</p> <p>Type 1 VWD is responsible for a vast majority of cases (&gt;75%) (Lavin 2017). It presents with mild to moderate mucosal bleeding symptoms, typically associated with a family history of bleeding and a quantitative reduction in von Willebrand factor (VWF) protein (Flood, 2016).</p> |
| <b>CONFLICT OF INTERESTS:</b>                                                                              | <p>ASH conflict of interest declaration and management policies were applied, and the following panel members were voting panel members (determining the direction and strength of the recommendation): Sandra Haberichter, Jeroen Eikenboom, Barbara Konkle, Robert Sidonio Jr, Simon McRae, James O'Donnell, Claire McLintock, Barbara Ameer, Nicolas Giraud, Nikole Scappe, Vicki Jacobs-Pratt, Paula James, Nathan Connell.</p> <p>Robert Montgomery was recused as a result of risk of conflicts of interest.</p>                                                                                                                                                                                                                                                                                      |

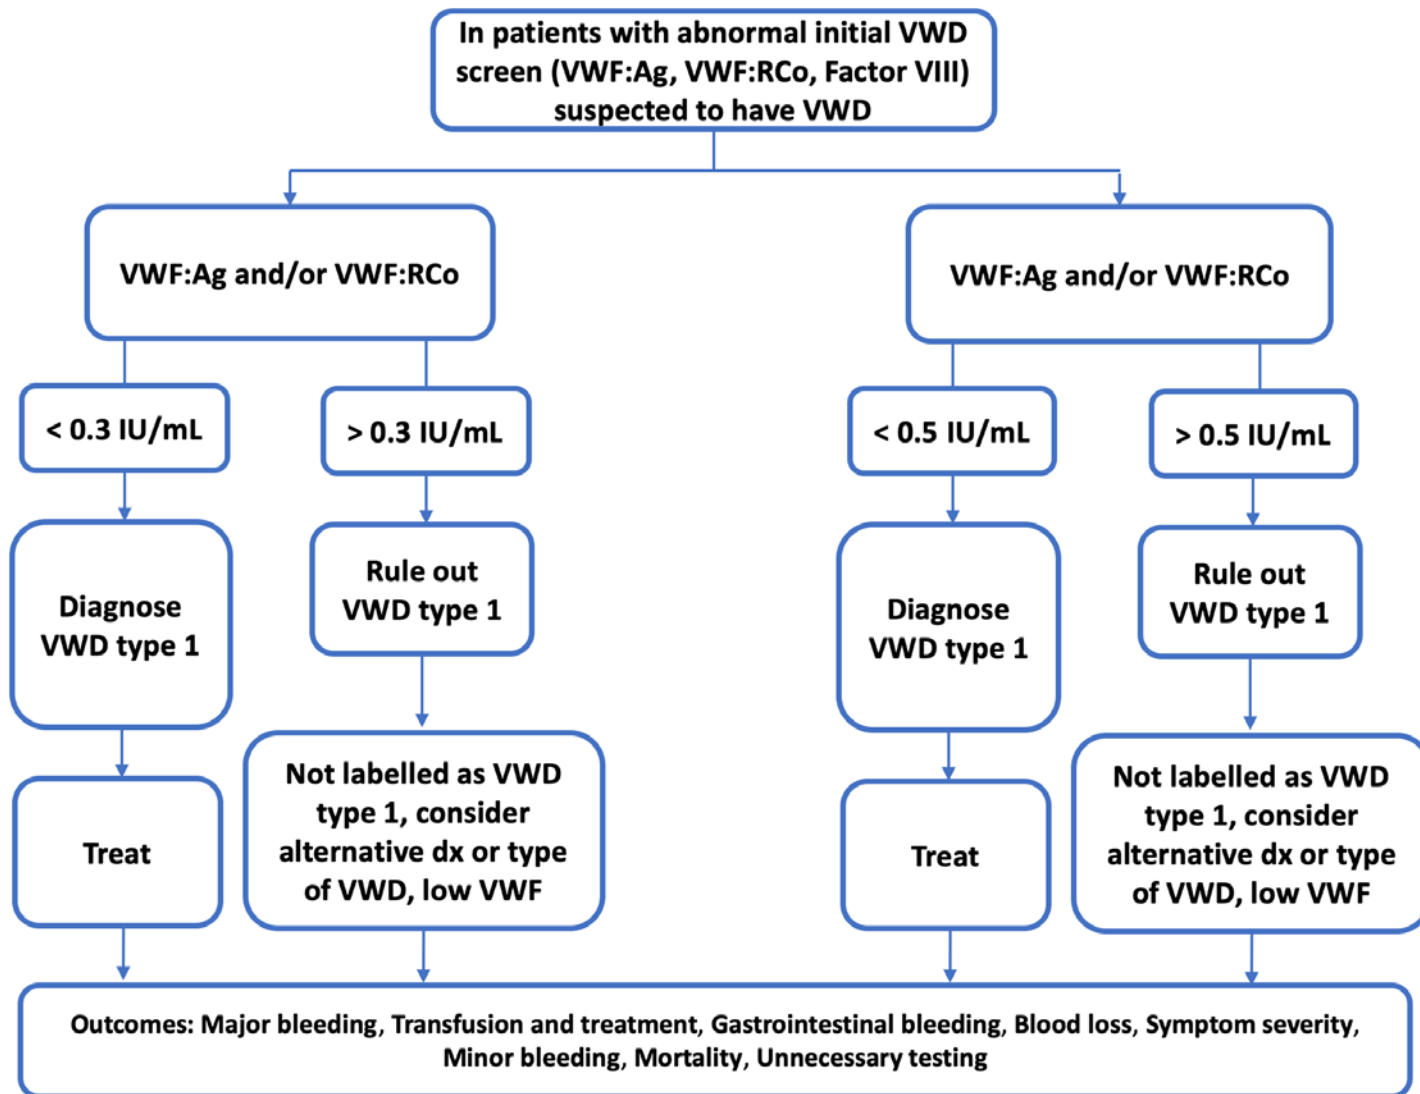

### ASSESSMENT

| Problem                                                       |                                                                                                                                                                               |                                                                |
|---------------------------------------------------------------|-------------------------------------------------------------------------------------------------------------------------------------------------------------------------------|----------------------------------------------------------------|
| Is the problem a priority?                                    |                                                                                                                                                                               |                                                                |
| JUDGEMENT                                                     | RESEARCH EVIDENCE                                                                                                                                                             | ADDITIONAL CONSIDERATIONS                                      |
| <input type="radio"/> No<br><input type="radio"/> Probably no | Von Willebrand disease (VWD) is the most common inherited bleeding disorder known in humans: while estimated to affect between 0.1 and 1% of the general population, many are | This question was judged to be a priority among many candidate |



|                                                                                                                         |                                                                                                                                                                                                                                                                                                                                                                                                                                                                                                                                                                                                                               |                                                                                                                               |
|-------------------------------------------------------------------------------------------------------------------------|-------------------------------------------------------------------------------------------------------------------------------------------------------------------------------------------------------------------------------------------------------------------------------------------------------------------------------------------------------------------------------------------------------------------------------------------------------------------------------------------------------------------------------------------------------------------------------------------------------------------------------|-------------------------------------------------------------------------------------------------------------------------------|
| <ul style="list-style-type: none"> <li>○ Probably yes</li> <li>● Yes</li> <li>○ Varies</li> <li>○ Don't know</li> </ul> | <p>never diagnosed. VWD diagnosis and classification require numerous laboratory tests. Type 1 VWD is frequently difficult to be diagnosed because of the limitations in laboratory diagnostic tests as well as overlapping nonspecific mild bleeding symptoms between healthy individuals and VWD patients (Pathare, 2018).</p> <p>Type 1 VWD is responsible for a vast majority of cases (&gt;75%) (Lavin 2017). It presents with mild to moderate mucosal bleeding symptoms, typically associated with a family history of bleeding and a quantitative reduction in von Willebrand factor (VWF) protein (Flood, 2016).</p> | <p>questions to address in these guidelines. The 0.3 diagnostic threshold was set historically based on expert consensus.</p> |
|-------------------------------------------------------------------------------------------------------------------------|-------------------------------------------------------------------------------------------------------------------------------------------------------------------------------------------------------------------------------------------------------------------------------------------------------------------------------------------------------------------------------------------------------------------------------------------------------------------------------------------------------------------------------------------------------------------------------------------------------------------------------|-------------------------------------------------------------------------------------------------------------------------------|

**Desirable Effects**  
How substantial are the desirable anticipated effects?

| <b>JUDGEMENT</b>                                                                                                                                          | <b>RESEARCH EVIDENCE</b>                                                                                                                                                                                                                                                                                                                                                                                                                                                                                                                                                                                                                                                                                                                                                                                                                                                                                                                                                                                                                                                                                                                                                                             | <b>ADDITIONAL CONSIDERATIONS</b>                                                                                                                                                                                                                                                                                                                                                                                                                                                                                                                                                                                                                                            |
|-----------------------------------------------------------------------------------------------------------------------------------------------------------|------------------------------------------------------------------------------------------------------------------------------------------------------------------------------------------------------------------------------------------------------------------------------------------------------------------------------------------------------------------------------------------------------------------------------------------------------------------------------------------------------------------------------------------------------------------------------------------------------------------------------------------------------------------------------------------------------------------------------------------------------------------------------------------------------------------------------------------------------------------------------------------------------------------------------------------------------------------------------------------------------------------------------------------------------------------------------------------------------------------------------------------------------------------------------------------------------|-----------------------------------------------------------------------------------------------------------------------------------------------------------------------------------------------------------------------------------------------------------------------------------------------------------------------------------------------------------------------------------------------------------------------------------------------------------------------------------------------------------------------------------------------------------------------------------------------------------------------------------------------------------------------------|
| <ul style="list-style-type: none"> <li>○ Trivial</li> <li>○ Small</li> <li>● Moderate</li> <li>○ Large</li> <li>○ Varies</li> <li>○ Don't know</li> </ul> | <p><b>True Positive:</b> These are patients who have VWD type 1 and who received preventive and appropriate treatment. They benefit from decreasing the risk of bleeding with treatment and they suffer the side effects of treatment.</p> <p><b>True Negative:</b> These are patients who did not have VWD type 1 and who were correctly identified as not having the disease. They will appropriately not receive treatment for VWD type 1 and not suffer the side effects of treatment but may benefit from treatment for other bleeding disorders.</p> <p><b>False Negative:</b> These are patients who have VWD type 1 but the diagnosis was missed and will be sent home without appropriate treatment. They face the risks of prolonged and heavy bleeding due to not receiving treatment. They will be considered for other bleeding disorders or labeled as low VWF.</p> <p><b>False Positive:</b> These are patients who did not have VWD type 1 but they will be labeled as having VWD and receive unnecessary treatment. They may benefit from the treatment if they have other bleeding disorders, but they suffer side effects. (this group is relevant for a cut-off of &lt;0.5).</p> | <p>The importance for the patient is whether they have the diagnosis, and will they be able to access the appropriate management. Diagnostic thresholds are important because they clearly outline the diagnosis and direct patients towards treatments.</p> <p>Prevent bleeding: Defining false positive and false negative for type 1 VWD is not the priority, it is a question of who is bleeding, and if they are bleeding because of their VWF levels or because of another reason.</p> <p>Treating patients: patients with negative test results may have other bleeding disorders that may benefit from treatment with desmopressin even if they don't have VWD.</p> |

**Undesirable Effects**  
How substantial are the undesirable anticipated effects?

| <b>JUDGEMENT</b> | <b>RESEARCH EVIDENCE</b> | <b>ADDITIONAL CONSIDERATIONS</b> |
|------------------|--------------------------|----------------------------------|
|------------------|--------------------------|----------------------------------|

|                                                                                                                                                           |                                                                                                                                                                                                                                                                                                                                                                                                                                                                                                                                                                                                                                                                                                                                                                                                                                                                                                                                                                                                                                                                                                                                                                                                      |                                                                                                           |
|-----------------------------------------------------------------------------------------------------------------------------------------------------------|------------------------------------------------------------------------------------------------------------------------------------------------------------------------------------------------------------------------------------------------------------------------------------------------------------------------------------------------------------------------------------------------------------------------------------------------------------------------------------------------------------------------------------------------------------------------------------------------------------------------------------------------------------------------------------------------------------------------------------------------------------------------------------------------------------------------------------------------------------------------------------------------------------------------------------------------------------------------------------------------------------------------------------------------------------------------------------------------------------------------------------------------------------------------------------------------------|-----------------------------------------------------------------------------------------------------------|
| <ul style="list-style-type: none"> <li>○ Large</li> <li>● Moderate</li> <li>○ Small</li> <li>○ Trivial</li> <li>○ Varies</li> <li>○ Don't know</li> </ul> | <p><b>True Positive:</b> These are patients who have VWD type 1 and who received preventive and appropriate treatment. They benefit from decreasing the risk of bleeding with treatment and they suffer the side effects of treatment.</p> <p><b>True Negative:</b> These are patients who did not have VWD type 1 and who were correctly identified as not having the disease. They will appropriately not receive treatment for VWD type 1 and not suffer the side effects of treatment but may benefit from treatment for other bleeding disorders.</p> <p><b>False Negative:</b> These are patients who have VWD type 1 but the diagnosis was missed and will be sent home without appropriate treatment. They face the risks of prolonged and heavy bleeding due to not receiving treatment. They will be considered for other bleeding disorders or labeled as low VWF.</p> <p><b>False Positive:</b> These are patients who did not have VWD type 1 but they will be labeled as having VWD and receive unnecessary treatment. They may benefit from the treatment if they have other bleeding disorders, but they suffer side effects. (this group is relevant for a cut-off of &lt;0.5).</p> | <p>Denied treatment to patients with VWD that were undiagnosed (false negative).</p> <p>Overdiagnosis</p> |
|-----------------------------------------------------------------------------------------------------------------------------------------------------------|------------------------------------------------------------------------------------------------------------------------------------------------------------------------------------------------------------------------------------------------------------------------------------------------------------------------------------------------------------------------------------------------------------------------------------------------------------------------------------------------------------------------------------------------------------------------------------------------------------------------------------------------------------------------------------------------------------------------------------------------------------------------------------------------------------------------------------------------------------------------------------------------------------------------------------------------------------------------------------------------------------------------------------------------------------------------------------------------------------------------------------------------------------------------------------------------------|-----------------------------------------------------------------------------------------------------------|

**Certainty of evidence**  
What is the overall certainty of the evidence of effects?

| JUDGEMENT                                                                                                                                      | RESEARCH EVIDENCE                                                                                                                                                                                                                                                                                                                                                                                               | ADDITIONAL CONSIDERATIONS                                                                                                                                                                                        |
|------------------------------------------------------------------------------------------------------------------------------------------------|-----------------------------------------------------------------------------------------------------------------------------------------------------------------------------------------------------------------------------------------------------------------------------------------------------------------------------------------------------------------------------------------------------------------|------------------------------------------------------------------------------------------------------------------------------------------------------------------------------------------------------------------|
| <ul style="list-style-type: none"> <li>○ Very low</li> <li>● Low</li> <li>○ Moderate</li> <li>○ High</li> <li>○ No included studies</li> </ul> | <p>While a clear-cut diagnosis is easy in severe von Willebrand factor reductions, the advantage of pursuing a definite diagnosis in mild or dubious cases should be weighed against the risk of over-medicalization. Identifying patients with VWD type 1 will help to give a treatment that will correct the defect of hemostasis caused by the abnormal/reduced von Willebrand factor. (Castaman, 2013).</p> | <p>The VWF gene is very highly susceptible to mutation so there are novel mutations causing VWD Type 1 that have not yet discovered, leading to a lack of agreed-on reference standard to define type 1 VWD.</p> |

**Values**  
Is there important uncertainty about or variability in how much people value the main outcomes?

| JUDGEMENT                                                                                                                                                                          | RESEARCH EVIDENCE | ADDITIONAL CONSIDERATIONS                                                                                                                                                              |
|------------------------------------------------------------------------------------------------------------------------------------------------------------------------------------|-------------------|----------------------------------------------------------------------------------------------------------------------------------------------------------------------------------------|
| <ul style="list-style-type: none"> <li>○ Important uncertainty or variability</li> <li>● Possibly important uncertainty or variability</li> <li>○ Probably no important</li> </ul> |                   | <p>While patients are interested in the results of the antigen and activity assays but frequently have little understanding of the tests and diagnostic thresholds, they desire an</p> |

uncertainty or variability  
○ No important  
uncertainty or variability

accurate diagnosis that will lead to proper treatment. Patients value clear and consistent guidelines on the reasons for different test choices and the diagnostic thresholds used, as patients are frustrated when they are not able to determine if they definitively do or do not have VWD. In speaking with others who have VWD, patients may desire the same testing regardless of need so they may compare results to each other. As an example, if a patient has bleeding symptoms and levels <50 they would think it is relevant to have the diagnosis by placing a higher value on avoiding bleeding compared to unnecessary treatment, costs, and risks of adverse reaction; however they might not be happy if the diagnosis was only restricted to levels <30. So, the cut-off values should not be applied in a stringent manner. The VWF antigen and activity are continuous variables with a continuous increase in bleeding risk with lower levels. The clinical phenotype is determined by more than the levels only. Results may confirm or exclude a prior diagnosis which may impact the patient's understanding of their bleeding and its treatment and could provoke fear of bleeding (or thrombosis) if treatment is changed.

Balance of effects

Does the balance between desirable and undesirable effects favor the intervention or the comparison?

| JUDGEMENT                                                                                                                                                                                                                                                                                                      | RESEARCH EVIDENCE | ADDITIONAL CONSIDERATIONS                                                                                                                                                                                                                                                                                                                                                                                                                                                              |
|----------------------------------------------------------------------------------------------------------------------------------------------------------------------------------------------------------------------------------------------------------------------------------------------------------------|-------------------|----------------------------------------------------------------------------------------------------------------------------------------------------------------------------------------------------------------------------------------------------------------------------------------------------------------------------------------------------------------------------------------------------------------------------------------------------------------------------------------|
| <ul style="list-style-type: none"> <li>○ Favors the comparison</li> <li>○ Probably favors the comparison</li> <li>● Does not favor either the intervention or the comparison</li> <li>○ Probably favors the intervention</li> <li>○ Favors the intervention</li> <li>○ Varies</li> <li>○ Don't know</li> </ul> |                   | <p>The panel considers the bleeding phenotype in patients as the most important factor to drive the decision. Mutations are more likely to be detected in patients with baseline levels &lt;30 but patients with levels 30-50 may also bleed because of their low levels.</p> <p>The panel is placing a high value on not missing the diagnosis especially in those patients who bleed. The panel also places a high value on avoiding overdiagnosis in patients who do not bleed.</p> |

**Resources required**

How large are the resource requirements (costs)?

| JUDGEMENT                                                                                                                                                                                                                      | RESEARCH EVIDENCE                                                                                                                                                                                                                                                                                                                                                                                                                                                                                                                                                                                                                                                                                                                                                                                                                                                                                                                                                                                                                                                                                                                                                                                               | ADDITIONAL CONSIDERATIONS |         |           |           |           |           |            |    |       |       |    |  |               |    |       |       |  |       |                  |    |        |     |         |  |                    |    |    |    |    |  |               |   |       |    |  |    |           |   |      |    |  |  |                                                           |
|--------------------------------------------------------------------------------------------------------------------------------------------------------------------------------------------------------------------------------|-----------------------------------------------------------------------------------------------------------------------------------------------------------------------------------------------------------------------------------------------------------------------------------------------------------------------------------------------------------------------------------------------------------------------------------------------------------------------------------------------------------------------------------------------------------------------------------------------------------------------------------------------------------------------------------------------------------------------------------------------------------------------------------------------------------------------------------------------------------------------------------------------------------------------------------------------------------------------------------------------------------------------------------------------------------------------------------------------------------------------------------------------------------------------------------------------------------------|---------------------------|---------|-----------|-----------|-----------|-----------|------------|----|-------|-------|----|--|---------------|----|-------|-------|--|-------|------------------|----|--------|-----|---------|--|--------------------|----|----|----|----|--|---------------|---|-------|----|--|----|-----------|---|------|----|--|--|-----------------------------------------------------------|
| <ul style="list-style-type: none"> <li>○ Large costs</li> <li>○ Moderate costs</li> <li>● Negligible costs and savings</li> <li>○ Moderate savings</li> <li>○ Large savings</li> <li>○ Varies</li> <li>○ Don't know</li> </ul> | <table border="1" data-bbox="436 906 1535 1271"> <thead> <tr> <th></th> <th></th> <th>VWF:Ag</th> <th>VWF:RCo</th> <th>VWF:Gp1bR</th> <th>VWF:Gp1bM</th> </tr> </thead> <tbody> <tr> <td><b>USA</b></td> <td>\$</td> <td>25-30</td> <td>25-30</td> <td>80</td> <td></td> </tr> <tr> <td><b>Canada</b></td> <td>\$</td> <td>25-30</td> <td>25-30</td> <td></td> <td>25-30</td> </tr> <tr> <td><b>Australia</b></td> <td>\$</td> <td>80-120</td> <td>250</td> <td>160-220</td> <td></td> </tr> <tr> <td><b>New Zealand</b></td> <td>\$</td> <td>12</td> <td>20</td> <td>15</td> <td></td> </tr> <tr> <td><b>Europe</b></td> <td>€</td> <td>25-30</td> <td>25</td> <td></td> <td>25</td> </tr> <tr> <td><b>UK</b></td> <td>£</td> <td>8-20</td> <td>30</td> <td></td> <td></td> </tr> </tbody> </table> <p data-bbox="426 1292 1524 1425">There is considerable variability in cost among different jurisdictions. Cost is also affected by different factors including insurance plans. The estimate provided are based on the clinical experts best estimates. The data for required resources for some of the assays are not available because of lack of availability of the assay in different countries.</p> |                           |         | VWF:Ag    | VWF:RCo   | VWF:Gp1bR | VWF:Gp1bM | <b>USA</b> | \$ | 25-30 | 25-30 | 80 |  | <b>Canada</b> | \$ | 25-30 | 25-30 |  | 25-30 | <b>Australia</b> | \$ | 80-120 | 250 | 160-220 |  | <b>New Zealand</b> | \$ | 12 | 20 | 15 |  | <b>Europe</b> | € | 25-30 | 25 |  | 25 | <b>UK</b> | £ | 8-20 | 30 |  |  | <p>There is no effect on changing the ratio on costs.</p> |
|                                                                                                                                                                                                                                |                                                                                                                                                                                                                                                                                                                                                                                                                                                                                                                                                                                                                                                                                                                                                                                                                                                                                                                                                                                                                                                                                                                                                                                                                 | VWF:Ag                    | VWF:RCo | VWF:Gp1bR | VWF:Gp1bM |           |           |            |    |       |       |    |  |               |    |       |       |  |       |                  |    |        |     |         |  |                    |    |    |    |    |  |               |   |       |    |  |    |           |   |      |    |  |  |                                                           |
| <b>USA</b>                                                                                                                                                                                                                     | \$                                                                                                                                                                                                                                                                                                                                                                                                                                                                                                                                                                                                                                                                                                                                                                                                                                                                                                                                                                                                                                                                                                                                                                                                              | 25-30                     | 25-30   | 80        |           |           |           |            |    |       |       |    |  |               |    |       |       |  |       |                  |    |        |     |         |  |                    |    |    |    |    |  |               |   |       |    |  |    |           |   |      |    |  |  |                                                           |
| <b>Canada</b>                                                                                                                                                                                                                  | \$                                                                                                                                                                                                                                                                                                                                                                                                                                                                                                                                                                                                                                                                                                                                                                                                                                                                                                                                                                                                                                                                                                                                                                                                              | 25-30                     | 25-30   |           | 25-30     |           |           |            |    |       |       |    |  |               |    |       |       |  |       |                  |    |        |     |         |  |                    |    |    |    |    |  |               |   |       |    |  |    |           |   |      |    |  |  |                                                           |
| <b>Australia</b>                                                                                                                                                                                                               | \$                                                                                                                                                                                                                                                                                                                                                                                                                                                                                                                                                                                                                                                                                                                                                                                                                                                                                                                                                                                                                                                                                                                                                                                                              | 80-120                    | 250     | 160-220   |           |           |           |            |    |       |       |    |  |               |    |       |       |  |       |                  |    |        |     |         |  |                    |    |    |    |    |  |               |   |       |    |  |    |           |   |      |    |  |  |                                                           |
| <b>New Zealand</b>                                                                                                                                                                                                             | \$                                                                                                                                                                                                                                                                                                                                                                                                                                                                                                                                                                                                                                                                                                                                                                                                                                                                                                                                                                                                                                                                                                                                                                                                              | 12                        | 20      | 15        |           |           |           |            |    |       |       |    |  |               |    |       |       |  |       |                  |    |        |     |         |  |                    |    |    |    |    |  |               |   |       |    |  |    |           |   |      |    |  |  |                                                           |
| <b>Europe</b>                                                                                                                                                                                                                  | €                                                                                                                                                                                                                                                                                                                                                                                                                                                                                                                                                                                                                                                                                                                                                                                                                                                                                                                                                                                                                                                                                                                                                                                                               | 25-30                     | 25      |           | 25        |           |           |            |    |       |       |    |  |               |    |       |       |  |       |                  |    |        |     |         |  |                    |    |    |    |    |  |               |   |       |    |  |    |           |   |      |    |  |  |                                                           |
| <b>UK</b>                                                                                                                                                                                                                      | £                                                                                                                                                                                                                                                                                                                                                                                                                                                                                                                                                                                                                                                                                                                                                                                                                                                                                                                                                                                                                                                                                                                                                                                                               | 8-20                      | 30      |           |           |           |           |            |    |       |       |    |  |               |    |       |       |  |       |                  |    |        |     |         |  |                    |    |    |    |    |  |               |   |       |    |  |    |           |   |      |    |  |  |                                                           |

|  |  |  |
|--|--|--|
|  |  |  |
|--|--|--|

**Certainty of evidence of required resources**

What is the certainty of the evidence of resource requirements (costs)?

| JUDGEMENT                                                                                                                                      | RESEARCH EVIDENCE | ADDITIONAL CONSIDERATIONS |
|------------------------------------------------------------------------------------------------------------------------------------------------|-------------------|---------------------------|
| <ul style="list-style-type: none"> <li>○ Very low</li> <li>○ Low</li> <li>○ Moderate</li> <li>○ High</li> <li>● No included studies</li> </ul> |                   |                           |

**Cost effectiveness**

Does the cost-effectiveness of the intervention favor the intervention or the comparison?

| JUDGEMENT                                                                                                                                                                                                                                                              | RESEARCH EVIDENCE | ADDITIONAL CONSIDERATIONS |
|------------------------------------------------------------------------------------------------------------------------------------------------------------------------------------------------------------------------------------------------------------------------|-------------------|---------------------------|
| <ul style="list-style-type: none"> <li>○ Favors the comparison</li> <li>○ Probably favors the comparison</li> <li>○ Does not favor either the intervention or the comparison</li> <li>○ Probably favors the intervention</li> <li>○ Favors the intervention</li> </ul> |                   |                           |

|                                                                                           |  |  |
|-------------------------------------------------------------------------------------------|--|--|
| <ul style="list-style-type: none"> <li>○ Varies</li> <li>● No included studies</li> </ul> |  |  |
|-------------------------------------------------------------------------------------------|--|--|

**Equity**  
What would be the impact on health equity?

| <b>JUDGEMENT</b>                                                                                                                                                                                                 | <b>RESEARCH EVIDENCE</b> | <b>ADDITIONAL CONSIDERATIONS</b>                                                                                                                                                                                                                                                                                                                                                                                                                                                                                                                                                                                                                                                                                                                                                                                                                                                |
|------------------------------------------------------------------------------------------------------------------------------------------------------------------------------------------------------------------|--------------------------|---------------------------------------------------------------------------------------------------------------------------------------------------------------------------------------------------------------------------------------------------------------------------------------------------------------------------------------------------------------------------------------------------------------------------------------------------------------------------------------------------------------------------------------------------------------------------------------------------------------------------------------------------------------------------------------------------------------------------------------------------------------------------------------------------------------------------------------------------------------------------------|
| <ul style="list-style-type: none"> <li>○ Reduced</li> <li>○ Probably reduced</li> <li>● Probably no impact</li> <li>○ Probably increased</li> <li>○ Increased</li> <li>○ Varies</li> <li>○ Don't know</li> </ul> |                          | <p>Not all tests are accessible to all patients. Therefore, a thorough and proper investigation may be limited due to the high cost and lack of exams with appropriate quality control.</p> <p>Insurance coverage for these tests is variable based on location and funding model. In the United States of America, most private insurance will cover VWF antigen and activity assays, but some patients may have a large deductible. Sometimes the reimbursed value does not cover the overall cost of the test, especially in public services.</p> <p>In New Zealand specifically, all residents get blood tests for free. This is also applicable in the United Kingdom, since there is no practical restriction on requesting these tests. In Italy, they are partly covered by insurance. In Australia, a limited number of antigen and activity assays are covered by</p> |

|  |  |                                                                                                                                                                                                                                                                                                                                                                                                                                                                                                                                                                                                     |
|--|--|-----------------------------------------------------------------------------------------------------------------------------------------------------------------------------------------------------------------------------------------------------------------------------------------------------------------------------------------------------------------------------------------------------------------------------------------------------------------------------------------------------------------------------------------------------------------------------------------------------|
|  |  | <p>insurance - above 3 assays the cost is not covered. In the Netherlands, all assays are covered by insurance. The VWF:RCo is potentially less useful in the African American population given the higher frequency of the D1472H variant in this population. Because of the higher rate of the benign variants that affect the VWF:RCo giving false positively low results, the VWF:GPIbM testing can be used in follow-up testing in Hispanic and African American populations more than Caucasian. The aforementioned populations may be less likely to have easy access to larger centers.</p> |
|--|--|-----------------------------------------------------------------------------------------------------------------------------------------------------------------------------------------------------------------------------------------------------------------------------------------------------------------------------------------------------------------------------------------------------------------------------------------------------------------------------------------------------------------------------------------------------------------------------------------------------|

**Acceptability**

Is the intervention acceptable to key stakeholders?

| JUDGEMENT                                                                                                                                                                                                                                                                                       | RESEARCH EVIDENCE | ADDITIONAL CONSIDERATIONS                                         |
|-------------------------------------------------------------------------------------------------------------------------------------------------------------------------------------------------------------------------------------------------------------------------------------------------|-------------------|-------------------------------------------------------------------|
| <ul style="list-style-type: none"> <li><input type="radio"/> No</li> <li><input type="radio"/> Probably no</li> <li><input type="radio"/> Probably yes</li> <li><input checked="" type="radio"/> Yes</li> <li><input type="radio"/> Varies</li> <li><input type="radio"/> Don't know</li> </ul> |                   | <p>Generally, all patients accept the blood tests in question</p> |

**Feasibility**

Is the intervention feasible to implement?

| JUDGEMENT                                                                                                                                                                                                                                             | RESEARCH EVIDENCE | ADDITIONAL CONSIDERATIONS                                                                                                                                                                  |
|-------------------------------------------------------------------------------------------------------------------------------------------------------------------------------------------------------------------------------------------------------|-------------------|--------------------------------------------------------------------------------------------------------------------------------------------------------------------------------------------|
| <ul style="list-style-type: none"> <li><input type="radio"/> No</li> <li><input type="radio"/> Probably no</li> <li><input type="radio"/> Probably yes</li> <li><input checked="" type="radio"/> Yes</li> <li><input type="radio"/> Varies</li> </ul> |                   | <p>Antigen and activity assays have limited availability – available in most larger population centers will have centralized testing in specialist centers. It is usually not found in</p> |

o Don't know

resource-poor countries and non-primary care hospitals even in high-income setting countries, specifically the activity assays. VWF:GPIIb or GPIbR is not available in most centers in the United States of America, but VWF:Ag and VWF:RCo are more readily available. VWF:Ag is only available in hospitals with special coagulation labs, and special coagulation labs usually only run either the VWF:RCo or one of the newer assays. Countries differ in the challenges to access the testing (referrals within the system and logistic issues like traveling hundreds of kilometers), so testing is often sent out reference laboratories (with all the issues of pre-analytical variables, including sample collection and transport that can affect the reliability of results) outside of medium to large academic centers in the United States. Even when the tests are available in smaller non-academic centers, results may differ when compared to those from large referral centers. Depending on where patients are allowed to undergo testing, there could be variation in results ( e.g., in California, insurers may not reimburse repeat testing of VWF:Ag and VWF:RCo or VWF:GPIIb to be done at the respective academic center if performed already at private commercial laboratories).



|  |  |                                                                                                                                                                                                                                                                                                                                                                                                                                                                                                                                                                                                                                                                                                                                                                                                                                                                                                                                                                                                                |
|--|--|----------------------------------------------------------------------------------------------------------------------------------------------------------------------------------------------------------------------------------------------------------------------------------------------------------------------------------------------------------------------------------------------------------------------------------------------------------------------------------------------------------------------------------------------------------------------------------------------------------------------------------------------------------------------------------------------------------------------------------------------------------------------------------------------------------------------------------------------------------------------------------------------------------------------------------------------------------------------------------------------------------------|
|  |  | <p>Often repeat testing is needed particularly if obtained at a time of stress (following a procedure) or in times of significant anemia. This issue is illustrated with teenage girls undergoing evaluation during an episode of heavy menstrual bleeding. Levels may be elevated over baseline and obscure the diagnosis of VWD or its subtype. It may be possible to say that one or two activity measures are not accurate and reduce their use, but many labs are bound by managed service contracts and performing all labs as a single 'best' assay is often not feasible.</p> <p>Another feasibility issue assay availability and turnaround time in the perioperative setting.</p> <p>Some of the tests, such as the VWF:RCo, have a considerable coefficient of variation, which may influence laboratory research. In addition, the physiological or induced variations of VWF plasma levels also may affect the diagnosis of borderline cases, especially of type 1 VWD and low levels of VWF.</p> |
|--|--|----------------------------------------------------------------------------------------------------------------------------------------------------------------------------------------------------------------------------------------------------------------------------------------------------------------------------------------------------------------------------------------------------------------------------------------------------------------------------------------------------------------------------------------------------------------------------------------------------------------------------------------------------------------------------------------------------------------------------------------------------------------------------------------------------------------------------------------------------------------------------------------------------------------------------------------------------------------------------------------------------------------|

**SUMMARY OF JUDGEMENTS**

|                            | JUDGEMENT |                 |                 |            |  |        |             |
|----------------------------|-----------|-----------------|-----------------|------------|--|--------|-------------|
| <b>PROBLEM</b>             | No        | Probably no     | Probably yes    | <b>Yes</b> |  | Varies | Don't know  |
| <b>DESIRABLE EFFECTS</b>   | Trivial   | Small           | <b>Moderate</b> | Large      |  | Varies | Don't know  |
| <b>UNDESIRABLE EFFECTS</b> | Large     | <b>Moderate</b> | Small           | Trivial    |  | Varies | Don't know  |
| <b>CERTAINTY OF</b>        | Very low  | <b>Low</b>      | Moderate        | High       |  |        | No included |

|                                             | JUDGEMENT                            |                                                      |                                                                 |                                         |                         |        |                            |
|---------------------------------------------|--------------------------------------|------------------------------------------------------|-----------------------------------------------------------------|-----------------------------------------|-------------------------|--------|----------------------------|
| EVIDENCE                                    |                                      |                                                      |                                                                 |                                         |                         |        | studies                    |
| VALUES                                      | Important uncertainty or variability | <b>Possibly important uncertainty or variability</b> | Probably no important uncertainty or variability                | No important uncertainty or variability |                         |        |                            |
| BALANCE OF EFFECTS                          | Favors the comparison                | Probably favors the comparison                       | <b>Does not favor either the intervention or the comparison</b> | Probably favors the intervention        | Favors the intervention | Varies | Don't know                 |
| RESOURCES REQUIRED                          | Large costs                          | Moderate costs                                       | <b>Negligible costs and savings</b>                             | Moderate savings                        | Large savings           | Varies | Don't know                 |
| CERTAINTY OF EVIDENCE OF REQUIRED RESOURCES | Very low                             | Low                                                  | Moderate                                                        | High                                    |                         |        | <b>No included studies</b> |
| COST EFFECTIVENESS                          | Favors the comparison                | Probably favors the comparison                       | Does not favor either the intervention or the comparison        | Probably favors the intervention        | Favors the intervention | Varies | <b>No included studies</b> |
| EQUITY                                      | Reduced                              | Probably reduced                                     | <b>Probably no impact</b>                                       | Probably increased                      | Increased               | Varies | Don't know                 |
| ACCEPTABILITY                               | No                                   | Probably no                                          | Probably yes                                                    | <b>Yes</b>                              |                         | Varies | Don't know                 |
| FEASIBILITY                                 | No                                   | Probably no                                          | Probably yes                                                    | <b>Yes</b>                              |                         | Varies | Don't know                 |

#### TYPE OF RECOMMENDATION

|                                                     |                                                          |                                                                               |                                                      |                                                         |
|-----------------------------------------------------|----------------------------------------------------------|-------------------------------------------------------------------------------|------------------------------------------------------|---------------------------------------------------------|
| Strong recommendation against the intervention<br>○ | Conditional recommendation against the intervention<br>○ | Conditional recommendation for either the intervention or the comparison<br>○ | Conditional recommendation for the intervention<br>○ | <b>Strong recommendation for the intervention<br/>●</b> |
|-----------------------------------------------------|----------------------------------------------------------|-------------------------------------------------------------------------------|------------------------------------------------------|---------------------------------------------------------|

#### CONCLUSIONS

## Recommendation

The panel recommends a VWF level of <30 IU/dL, and in patients with abnormal bleeding, a VWF level of 30-50 IU/dL, to confirm the diagnosis of Type 1 VWD. (Strong recommendation based on low certainty in the evidence)

### Remarks:

- VWF level(s) refers to VWF:Ag and/or VWF activity
- Patients with a family history of Type 1 VWD in a first degree relative and VWF levels of 30-50 IU/dL should be diagnosed with Type 1 VWD.
- A concomitant bleeding disorder should be considered in patients with VWF levels of 30-50 IU/dL.

## Justification

With this recommendation, the panel is placing high value on not missing the diagnosis especially in those patients who bleed. The panel also places a high value on avoiding overdiagnosis in patients who do not bleed.

## Subgroup considerations

## Implementation considerations

## Monitoring and evaluation

## Research priorities

- Detailed data about levels 30-60 and their relation to bleeding symptoms.
- Information about family members of patients with VWD.

## APPENDIX

### 1. Risk of bias:

| Author, year      | Patient selection Risk of bias | Index test Risk of bias | Reference standard Risk of bias | Flow and timing Risk of bias |
|-------------------|--------------------------------|-------------------------|---------------------------------|------------------------------|
| Lavin, 2017       | Low                            | Moderate                | Low                             | Low                          |
| Flood, 2016       | Low                            | Moderate                | Low                             | Low                          |
| Bucciarelli, 2015 | Low                            | Moderate                | Low                             | Low                          |
| Quiroga, 2014     | Low                            | Low                     | Moderate                        | Low                          |
| Bowman, 2009      | Low                            | Low                     | Low                             | Low                          |
| Tosetto, 2007     | Low                            | Moderate                | Low                             | Low                          |
| James, 2007       | Low                            | Moderate                | Low                             | Low                          |
| Goodeve, 2007     | Low                            | Moderate                | Low                             | Low                          |
| Eikenboom, 2006   | Low                            | Moderate                | Low                             | Low                          |

### 2. Outcomes:

| Certainty assessment                                           |                       |              |               |              |             |                      | Impact                                                                                                                                                                                                                                                                                                                                                                                                                                                                                                                                                   | Certainty   |
|----------------------------------------------------------------|-----------------------|--------------|---------------|--------------|-------------|----------------------|----------------------------------------------------------------------------------------------------------------------------------------------------------------------------------------------------------------------------------------------------------------------------------------------------------------------------------------------------------------------------------------------------------------------------------------------------------------------------------------------------------------------------------------------------------|-------------|
| No of studies                                                  | Study design          | Risk of bias | Inconsistency | Indirectness | Imprecision | Other considerations |                                                                                                                                                                                                                                                                                                                                                                                                                                                                                                                                                          |             |
| <b>Mutation detection</b>                                      |                       |              |               |              |             |                      |                                                                                                                                                                                                                                                                                                                                                                                                                                                                                                                                                          |             |
| 3 <sup>1,2,3</sup>                                             | observational studies | not serious  | not serious   | not serious  | not serious | none                 | <ul style="list-style-type: none"> <li>for VWF:Ag &lt;0.3 mutations were detected in 75-82% of patients in 2 studies</li> <li>for VWF:Ag 0.3-0.5 mutations were detected in 44-60% of patients in 3 studies</li> </ul>                                                                                                                                                                                                                                                                                                                                   | ⊕⊕○○<br>LOW |
| <b>Likelihood ratios (LRs) of von Willebrand disease (VWD)</b> |                       |              |               |              |             |                      |                                                                                                                                                                                                                                                                                                                                                                                                                                                                                                                                                          |             |
| 2 <sup>4,5</sup>                                               | observational studies | not serious  | not serious   | not serious  | not serious | none                 | <ul style="list-style-type: none"> <li>Tosetto 2007 et al (MCMDM-1VWD), in patients with VWD and family history of VWD: Level &lt;20, LR = 374 (52.2–2677). Level 20-40, LR = 95.1 (39.1–232). Level 40-60, LR = 1.82 (1.28–2.58). Level &gt;60, LR = 0.10 (0.06–0.16).</li> <li>Bucciarelli et al, in patients who were investigated for bleeding episodes: Levels 30-40 dL, LR of having VWD = ∞ (in all of them, VWD was confirmed by second-level tests), Levels 41-50 dL, LR = 0.73 (0.41–1.30), Levels 51-60 dL, LR = 0.33 (0.18–0.62).</li> </ul> | ⊕⊕○○<br>LOW |

VWF level and Bleeding score correlation

|                  |                       |             |                      |             |             |      |                                                                                                                                                                                                                                                                                                                                                                                                                                                                                    |                  |
|------------------|-----------------------|-------------|----------------------|-------------|-------------|------|------------------------------------------------------------------------------------------------------------------------------------------------------------------------------------------------------------------------------------------------------------------------------------------------------------------------------------------------------------------------------------------------------------------------------------------------------------------------------------|------------------|
| 2 <sup>1,2</sup> | observational studies | not serious | serious <sup>a</sup> | not serious | not serious | none | in Lavin, 2017 the majority of patients with low VWF had significant bleeding histories, as determined using either the ISTH BAT or the Condensed MCMDM-1 VWD score, respectively. In Flood, 2016, there was no difference between BS and VWF levels because the BS used was after patients were recruited in the study and were receiving treatment. Data from unpublished work showed a continuum, with a higher BS in those with lower VWF at the time of enrollment/diagnosis. | ⊕○○○<br>VERY LOW |
|------------------|-----------------------|-------------|----------------------|-------------|-------------|------|------------------------------------------------------------------------------------------------------------------------------------------------------------------------------------------------------------------------------------------------------------------------------------------------------------------------------------------------------------------------------------------------------------------------------------------------------------------------------------|------------------|

Bleeding tendency

|                |                       |             |             |             |             |      |                                                                                                                                                                                                                                                                   |             |
|----------------|-----------------------|-------------|-------------|-------------|-------------|------|-------------------------------------------------------------------------------------------------------------------------------------------------------------------------------------------------------------------------------------------------------------------|-------------|
| 1 <sup>5</sup> | observational studies | not serious | not serious | not serious | not serious | none | In Bucciarelli, 2015, 70/93 (75%) with borderline VWF (0.3-0.5) were investigated after a bleeding episode: mucocutaneous bleeding was present in 35, 25 bled after surgery, and 10 bled after dental procedures. Ten patients experienced more than one symptom. | ⊕⊕○○<br>LOW |
|----------------|-----------------------|-------------|-------------|-------------|-------------|------|-------------------------------------------------------------------------------------------------------------------------------------------------------------------------------------------------------------------------------------------------------------------|-------------|

CI: Confidence interval

*Explanations*

a. Results from the 2 studies are not consistent with each other

*References*

1. Lavin, . . . 2017.
2. Flood, . . . 2016.
3. James, . . . 2007.
4. tosetto, . . . 2007.
5. Bucciarelli, . . . 2015.

➤ *Mutations detection:*

| Author, year    | Mutations detection                                                                                                                                                                                                                                                                                                                                                                                             |
|-----------------|-----------------------------------------------------------------------------------------------------------------------------------------------------------------------------------------------------------------------------------------------------------------------------------------------------------------------------------------------------------------------------------------------------------------|
| Lavin, 2017     | VWF gene sequence variations in 60.3% of the LoVIC cohort.<br>Importantly, previously described damaging VWF variants, or sequence variations predicted to be damaging, were observed in only 39.7% of patients with low VWF levels.                                                                                                                                                                            |
| Flood, 2016     | VWF sequence variations with VWF:Ag <30 IU/dL (82%), whereas subjects with type 1 VWD and VWF:Ag >30 IU/dL had an intermediate frequency of variants (44%).                                                                                                                                                                                                                                                     |
| James, 2007     | in 32 index cases with level <0.30, mutations within the VWF gene were found in 24 (75%).<br>In 91 index cases with level >0.30, mutations within the VWF gene were found in 45 (49%).<br>(P = .114, Pearson chi-square)<br>3 index cases with VWF:Ag levels less than 0.20 IU/mL for whom VWF gene mutations were not identified                                                                               |
| Eikenboom, 2006 | Logarithm of the odds (LOD score): In genetics, the LOD score is a statistical estimate of whether two genes, or a gene and a disease gene, are likely to be located near each other on a chromosome and are therefore likely to be inherited.<br>- Clinical practice diagnosis: Ag<30 - 17.4, Ag>30 - 8.41<br>- Stringent diagnosis: Ag<30 - 2.51, Ag>30 - 0<br>- Bleeding diathesis: Ag<30 - 1.99, Ag>30 0.21 |

➤ *Likelihood ratios:*

| <b>Author, Year</b> | <b>Outcome</b>                                                                                                                                                                                                                 | <b>Likelihood ratios</b>                                                                                                                                                                                                                                                                                                                                                          |
|---------------------|--------------------------------------------------------------------------------------------------------------------------------------------------------------------------------------------------------------------------------|-----------------------------------------------------------------------------------------------------------------------------------------------------------------------------------------------------------------------------------------------------------------------------------------------------------------------------------------------------------------------------------|
| Bucciarelli, 2015   | Likelihood ratios (LRs) of von Willebrand disease (VWD) diagnosis according to von Willebrand factor ristocetin cofactor activity (VWF:RCo) plasma levels                                                                      | In 45 of the 93 individuals with borderline VWF plasma levels (48%), the diagnosis of VWD was confirmed with second-level tests. Of these, 38 (84%) were found to be type 1 and seven (16%) type 2.<br>Levels 30-40 dL, LR = ∞ (in all of them, VWD was confirmed by second-level tests)<br>Levels 41-50 dL, LR = 0.73 0.73 (0.41–1.30)<br>Levels 51-60 dL, LR = 0.33 (0.18–0.62) |
| Tosetto, 2007       | Diagnostic positive likelihood ratios (LR) for von Willebrand factor antigen (VWF:Ag) and VWF ristocetin cofactor (VWF:RCo) in 204 subjects considered as affected in the present study in comparison to 1155 healthy controls | Level <20, LR = 374 (52.2–2677)<br>Level 20-40, LR = 95.1 (39.1–232)<br>Level 40-60, LR = 1.82 (1.28–2.58)<br>Level >60, LR = 0.10 (0.06–0.16).<br>These results are consistent when splitting the patients into subgroups of abnormal multimers (except for level 40-60, LR = 0.65 (0.31-1.37)), normal multimers and mutation, normal multimers no mutation.                    |
| Goodeve, 2007       | Association between the presence of mutations and VWF level in index cases                                                                                                                                                     | Level 0-15, OR = 23.0 (2.9-182.6)<br>Level 16-30, OR = 5.0 (1.8-14.0)<br>Level 31-45, OR = 2.2 (0.90-5.3)<br>Level >45, OR = 1                                                                                                                                                                                                                                                    |
| Eikenboom, 2006     | Association between co-segregation of the clinical practice diagnosis and categories of VWF in index cases                                                                                                                     | Level 0-15, OR 1<br>Level 16-30, OR 0.73 (0.20–2.68)<br>Level 31-45, OR 0.67 (0.19–2.32)<br>Level >45, OR 0.24 (0.07–0.82)                                                                                                                                                                                                                                                        |

➤ *Bleeding tendency:*

| <b>Author, year</b> | <b>Outcomes</b>              | <b>Results</b>                                                                                                                                                      |
|---------------------|------------------------------|---------------------------------------------------------------------------------------------------------------------------------------------------------------------|
| Lavin, 2017         | Bleeding history and low VWF | the majority of patients with low VWF had significant bleeding histories, as determined using either the ISTH BAT or the Condensed MCMDM-1 VWD score, respectively. |

|                   |                                     |                                                                                                                                                                                                                                   |
|-------------------|-------------------------------------|-----------------------------------------------------------------------------------------------------------------------------------------------------------------------------------------------------------------------------------|
| Bucciarelli, 2015 | Bleeding tendency in borderline VWF | 70/93 with borderline VWF (75%) were investigated after a bleeding episode: mucocutaneous bleeding was present in 35, 25 bled after surgery, and 10 bled after dental procedures. Ten patients experienced more than one symptom. |
|-------------------|-------------------------------------|-----------------------------------------------------------------------------------------------------------------------------------------------------------------------------------------------------------------------------------|

➤ *Diagnostic test accuracy:*

| Author, Year  | Outcome                                                                                                                                                                                                                                                                                                                                                          | Results                                                                                                                                                                                                                                                                                                                                    |
|---------------|------------------------------------------------------------------------------------------------------------------------------------------------------------------------------------------------------------------------------------------------------------------------------------------------------------------------------------------------------------------|--------------------------------------------------------------------------------------------------------------------------------------------------------------------------------------------------------------------------------------------------------------------------------------------------------------------------------------------|
| Quiroga, 2014 | Diagnosis rate at different cut-off (<30, <40, <2.5th percentile). (i) NHLBI recommendation (VWF:Ag or VWF:RCo < 30 IU dL and measurements between 30 and 50 IU dL to qualify for 'possible type 1 VWD' or 'low VWF'); (ii) EUVWD criterion: plasma VWF:RCo or VWF:CB < 40 IU dL; and (iii) ZPMCBVWD preliminary criterion: plasma VWF:Ag or VWF:RCo < 40 IU dL. | The NHLBI recommendation allowed diagnosing 122 (2.8%) of 4298 patients, whereas the same data analyzed by the EUVWD, ZPMCBVWD, and 2.5th percentiles criteria led to 339 (7.9%), 357 (8.3%) and 280 (6.5%) patients with diagnosis of the disease, respectively, equivalent to 2.8-, 2.9-, and 2.3-fold increases in the diagnostic rate. |
| Bowman, 2009  | DTA for different VWF levels                                                                                                                                                                                                                                                                                                                                     | The sensitivity and specificity for VWF:RCo < 0.40 IU/mL are 80% and 100%, respectively. The sensitivity for VWF:RCo < 0.30 IU/mL is 75% (this is lower than the higher cut-off values because of the small sample size; specificity cannot be calculated below 0.40) and that for VWF:RCo < 0.20 IU/mL is 100%.                           |

**References:**

1. Lavin M, Aguila, S., Schneppenheim, S., Dalton, N., Jones, K. L., O'Sullivan, J. M., O'Connell, N. M., Ryan, K., White, B., Byrne, M., Rafferty, M., Doyle, M. M., Nolan, M., Preston, R. J. S., Budde, U., James, P., Di Paola, J., O'Donnell, J. S. Novel insights into the clinical phenotype and pathophysiology underlying low VWF levels. *Blood*. 2017;130(21):2344-2353.
2. Flood VH, Christopherson, P. A., Gill, J. C., Friedman, K. D., Haberichter, S. L., Bellissimo, D. B., Udani, R. A., Dasgupta, M., Hoffmann, R. G., Ragni, M. V., Shapiro, A. D., Lusher, J. M., Lentz, S. R., Abshire, T. C., Leissing, C., Hoots, W. K., Manco-Johnson, M. J., Gruppo, R. A., Boggio, L. N., Montgomery, K. T., Goodeve, A. C., James, P. D., Lillicrap, D., Peake, I. R., Montgomery, R. R. Clinical and laboratory variability in a cohort of patients diagnosed with type 1 VWD in the United States. *Blood*. 2016;127(20):2481-2488.
3. Bucciarelli P, Siboni, S. M., Stufano, F., Biguzzi, E., Canciani, M. T., Baronciani, L., Pagliari, M. T., La Marca, S., Mistretta, C., Rosendaal, F. R., Peyvandi, F. Predictors of von willebrand disease diagnosis in individuals with borderline von willebrand factor plasma levels. *Journal of Thrombosis and Haemostasis*. 2015;13(2):228-236.
4. Quiroga T, Goycoolea, M., Belmont, S., Panes, O., Aranda, E., Zuniga, P., Pereira, J., Mezzano, D. Quantitative impact of using different criteria for the laboratory diagnosis of type 1 von Willebrand disease. *Journal of Thrombosis and Haemostasis*. 2014;12(8):1238-1243.

5. Bowman M, Riddel, J., Rand, M. L., Tosetto, A., Silva, M., James, P. D. Evaluation of the diagnostic utility for von Willebrand disease of a pediatric bleeding questionnaire. *Journal of Thrombosis and Haemostasis*. 2009;7(8):1418-1421.
6. Tosetto A, Rodeghiero, F., Castaman, G., Bernardi, M., Bertocello, K., Goodeve, A., Federici, A. B., Batlle, J., Meyer, D., Mazurier, C., Goudemand, J., Eikenboom, J., Schneppenheim, R., Budde, U., Ingerslev, J., Vorlova, Z., Habart, D., Holmberg, L., Lethagen, S., Pasi, J., Hill, F., Peake, I. Impact of plasma von Willebrand factor levels in the diagnosis of type 1 von Willebrand disease: Results from a multicenter European study (MCMDM-1VWD). *Journal of Thrombosis and Haemostasis*. 2007;5(4):715-721.
7. James PD, Notley C, Hegadorn C, et al. The mutational spectrum of type 1 von Willebrand disease: results from a Canadian cohort study. *Blood*. 2007;109(1):145.
8. Goodeve A, Eikenboom, J., Castaman, G., Rodeghiero, F., Federici, A. B., Batlle, J., Meyer, D., Mazurier, C., Goudemand, J., Schneppenheim, R., Budde, U., Ingerslev, J., Habart, D., Vorlova, Z., Holmberg, L., Lethagen, S., Pasi, J., Hill, F., Hashemi Soteh, M., Baronciani, L., Hallden, C., Guilliat, A., Lester, W., Peake, I. Phenotype and genotype of a cohort of families historically diagnosed with type 1 von Willebrand disease in the European study, Molecular and Clinical Markers for the Diagnosis and Management of Type 1 von Willebrand Disease (MCMDM-1VWD). [Erratum appears in *Blood*. 2008 Mar 15;111(6):3299-300]. *Blood*. 2007;109(1):112-121.
9. EIKENBOOM J, VAN MARION V, PUTTER H, et al. Linkage analysis in families diagnosed with type 1 von Willebrand disease in the European study, molecular and clinical markers for the diagnosis and management of type 1 VWD. *Journal of Thrombosis and Haemostasis*. 2006;4(4):774-782.
10. Nichols WL, Hultin MB, James AH, Manco-Johnson MJ, Montgomery RR, Ortel TL, Rick ME, Sadler JE, Weinstein M, Yawn BP. von Willebrand disease (VWD): evidence-based diagnosis and management guidelines, the National Heart, Lung, and Blood Institute (NHLBI) Expert Panel report (USA). *Haemophilia* 2008; 14: 171–232.



## Question 6

Should the VWF propeptide to VWF:Ag ratio vs. a desmopressin trial (with 1 and 4 hour levels) be used to diagnose VWD type 1C in patients with suspected VWD type 1C?

|                               |                                                                                                                                                                                                                                                                                                                                                                                                                                                                                                                                                                                                                                                    |
|-------------------------------|----------------------------------------------------------------------------------------------------------------------------------------------------------------------------------------------------------------------------------------------------------------------------------------------------------------------------------------------------------------------------------------------------------------------------------------------------------------------------------------------------------------------------------------------------------------------------------------------------------------------------------------------------|
| <b>POPULATION:</b>            | patients with suspected VWD type 1C                                                                                                                                                                                                                                                                                                                                                                                                                                                                                                                                                                                                                |
| <b>INTERVENTION:</b>          | VWF propeptide to VWF:Ag ratio                                                                                                                                                                                                                                                                                                                                                                                                                                                                                                                                                                                                                     |
| <b>COMPARISON:</b>            | desmopressin trial (with 1 and 4 hour levels)                                                                                                                                                                                                                                                                                                                                                                                                                                                                                                                                                                                                      |
| <b>PURPOSE OF THE TEST:</b>   | Identify VWD type 1C patients                                                                                                                                                                                                                                                                                                                                                                                                                                                                                                                                                                                                                      |
| <b>ROLE OF THE TEST:</b>      | Identify VWD type 1C patients                                                                                                                                                                                                                                                                                                                                                                                                                                                                                                                                                                                                                      |
| <b>LINKED TREATMENTS:</b>     | Desmopressin, Tranexamic acid, Factor replacement                                                                                                                                                                                                                                                                                                                                                                                                                                                                                                                                                                                                  |
| <b>ANTICIPATED OUTCOMES:</b>  | VWFpp/Ag – False positive, VWFpp/Ag – False negative, VWFpp/Ag – True positive, VWFpp/Ag – True negative Major bleeding, transfusion and treatment, blood loss, gastrointestinal bleeding, symptom severity, minor bleeding, mortality.                                                                                                                                                                                                                                                                                                                                                                                                            |
| <b>SETTING:</b>               | Outpatient                                                                                                                                                                                                                                                                                                                                                                                                                                                                                                                                                                                                                                         |
| <b>PERSPECTIVE:</b>           | Clinical recommendation – population perspective                                                                                                                                                                                                                                                                                                                                                                                                                                                                                                                                                                                                   |
| <b>BACKGROUND:</b>            | Von Willebrand disease (VWD) is the most common inherited bleeding disorder known in humans: while estimated to affect between 0.1 and 1% of the general population, many are never diagnosed (Pathare, 2018). A shorter VWF survival has been suggested as a mechanism behind VWD (Casonato, 2002; Brown, 2003). A greater VWF clearance from the plasma was first described in type 1 VWD (Casonato et al, 2002) and a shorter VWF survival has also been reported in type 1 VWD (Brown et al, 2003). Haberichter et al (2006) claimed that a shorter VWF survival can be predicted from the ratio of VWFpp to VWF concentrations in the plasma. |
| <b>SUBGROUPS:</b>             |                                                                                                                                                                                                                                                                                                                                                                                                                                                                                                                                                                                                                                                    |
| <b>CONFLICT OF INTERESTS:</b> | ASH conflict of interest declaration and management policies were applied, and the following panel members were voting panel members (determining the direction and strength of the recommendation): Sandra Haberichter, Jeroen Eikenboom, James O'Donnell, Claire McLintock, Simon McRae, Barbara Ameer, Nicolas Giraud, Nikole Scappe, Vicki Jacobs-Pratt, Paula James, Nathan Connell.<br><br>Barbara Konkle, Robert Sidonio Jr, and Robert Montgomery were recused as a result of risk of conflicts of interest.                                                                                                                               |

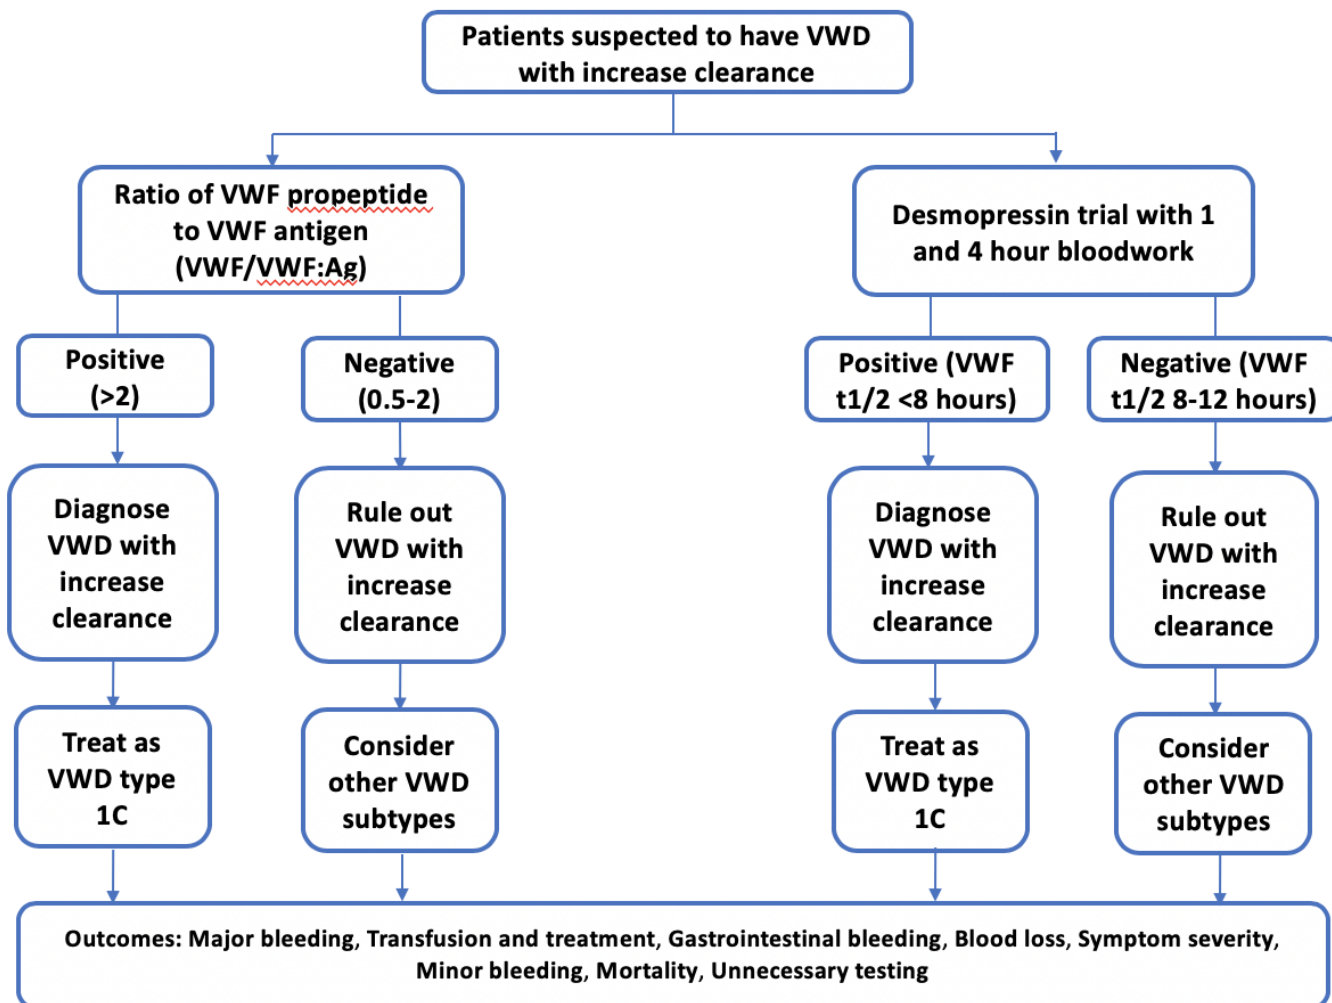

## ASSESSMENT

| Problem                                                                                               |                                                                                                                                                                                                                         |                                                                                                                 |
|-------------------------------------------------------------------------------------------------------|-------------------------------------------------------------------------------------------------------------------------------------------------------------------------------------------------------------------------|-----------------------------------------------------------------------------------------------------------------|
| Is the problem a priority?                                                                            |                                                                                                                                                                                                                         |                                                                                                                 |
| JUDGEMENT                                                                                             | RESEARCH EVIDENCE                                                                                                                                                                                                       | ADDITIONAL CONSIDERATIONS                                                                                       |
| <ul style="list-style-type: none"> <li>○ No</li> <li>○ Probably no</li> <li>○ Probably yes</li> </ul> | <p>Von Willebrand disease (VWD) is the most common inherited bleeding disorder known in humans: while estimated to affect between 0.1 and 1% of the general population, many are never diagnosed (Pathare, 2018). A</p> | <p>This question was judged to be a priority among many candidate questions to address in these guidelines.</p> |

|                                                                                                 |                                                                                                                                                                                                                                                                                                                                                                                                                                                                                                                                                                                                                                                                                                                                                                       |  |
|-------------------------------------------------------------------------------------------------|-----------------------------------------------------------------------------------------------------------------------------------------------------------------------------------------------------------------------------------------------------------------------------------------------------------------------------------------------------------------------------------------------------------------------------------------------------------------------------------------------------------------------------------------------------------------------------------------------------------------------------------------------------------------------------------------------------------------------------------------------------------------------|--|
| <ul style="list-style-type: none"> <li>● Yes</li> <li>○ Varies</li> <li>○ Don't know</li> </ul> | <p>shorter VWF survival has been suggested as a mechanism behind VWD (Casonato, 2002; Brown, 2003). A greater VWF clearance from the plasma was first described in type Vicenza VWD (Casonato et al, 2002) and a shorter VWF survival has also been reported in type 1 VWD (Brown et al, 2003). Haberichter et al (2006) claimed that a shorter VWF survival can be predicted from the ratio of VWF propeptide to VWF antigen concentrations in the plasma. Based on unpublished data, the VWF level cut-off for testing patients suspected of type 1C VWD is &lt;30 IU/dL (Haberichter), and the levels are lower than expected to see from the bleeding phenotype for type 1C, in which bleeding is less severe than the type 3, even with the very low levels.</p> |  |
|-------------------------------------------------------------------------------------------------|-----------------------------------------------------------------------------------------------------------------------------------------------------------------------------------------------------------------------------------------------------------------------------------------------------------------------------------------------------------------------------------------------------------------------------------------------------------------------------------------------------------------------------------------------------------------------------------------------------------------------------------------------------------------------------------------------------------------------------------------------------------------------|--|

**Test accuracy**  
How accurate is the test?

| JUDGEMENT                                                                                                                                                                      | RESEARCH EVIDENCE                                                                                                                                                                                                                                                                                                                                                                                                                                                                                                                                                                                                                                                                                                                                                                                                                                                                                                                                                                                                                                                                                                                                                                                                                                                                                                                                                                                                                                                                                                                                                                                                                                                                                                                                                                                                                                                                                                                                                                                                                                                                                                                                                                                                                          | ADDITIONAL CONSIDERATIONS    |                                   |                              |                                   |                                                      |                                                                                                                                                                                                                                                                                                                                                                                                                                                                                                                                                                                                                                                                                                                                                                                                                                                                                                                                                                                                           |                           |                                 |  |
|--------------------------------------------------------------------------------------------------------------------------------------------------------------------------------|--------------------------------------------------------------------------------------------------------------------------------------------------------------------------------------------------------------------------------------------------------------------------------------------------------------------------------------------------------------------------------------------------------------------------------------------------------------------------------------------------------------------------------------------------------------------------------------------------------------------------------------------------------------------------------------------------------------------------------------------------------------------------------------------------------------------------------------------------------------------------------------------------------------------------------------------------------------------------------------------------------------------------------------------------------------------------------------------------------------------------------------------------------------------------------------------------------------------------------------------------------------------------------------------------------------------------------------------------------------------------------------------------------------------------------------------------------------------------------------------------------------------------------------------------------------------------------------------------------------------------------------------------------------------------------------------------------------------------------------------------------------------------------------------------------------------------------------------------------------------------------------------------------------------------------------------------------------------------------------------------------------------------------------------------------------------------------------------------------------------------------------------------------------------------------------------------------------------------------------------|------------------------------|-----------------------------------|------------------------------|-----------------------------------|------------------------------------------------------|-----------------------------------------------------------------------------------------------------------------------------------------------------------------------------------------------------------------------------------------------------------------------------------------------------------------------------------------------------------------------------------------------------------------------------------------------------------------------------------------------------------------------------------------------------------------------------------------------------------------------------------------------------------------------------------------------------------------------------------------------------------------------------------------------------------------------------------------------------------------------------------------------------------------------------------------------------------------------------------------------------------|---------------------------|---------------------------------|--|
| <ul style="list-style-type: none"> <li>○ Very inaccurate</li> <li>○ Inaccurate</li> <li>○ Accurate</li> <li>○ Very accurate</li> <li>○ Varies</li> <li>● Don't know</li> </ul> | <p>No test accuracy results were presented in the studies because of the lack of an agreed-on reference standard to define type 1 C VWD, desmopressin trial was used in some papers to determine the increased clearance and the propeptide ratio was used in other papers.</p> <p>However, an inverse correlation between VWFpp/VWF:Ag and VWF antigen half-life was shown in 3 studies. The results indicate that the steady-state ratio of plasma VWFpp and VWF can be used to easily identify patients with type 1 VWD with an increased plasma VWF clearance phenotype.</p> <table border="1" data-bbox="520 956 1421 1484"> <thead> <tr> <th data-bbox="527 961 709 1068">Outcomes</th> <th data-bbox="716 961 1182 1068">Impact</th> <th data-bbox="1188 961 1310 1068">No of participants (studies)</th> <th data-bbox="1316 961 1415 1068">Certainty of the evidence (GRADE)</th> </tr> </thead> <tbody> <tr> <td data-bbox="527 1073 709 1479">VWFpp/VWF:Ag ratio correlation with VWF:Ag half life</td> <td data-bbox="716 1073 1182 1479"> <p>In Sztukowska, 2008, a pronounced drop in VWF survival in the type Vicenza VWD patients was reported: mean t1/2 significantly lower than in controls (1.3 ± 0.2 h, P &lt; 0.0001). A dramatic increase in VWFpp ratio in the type Vicenza VWD cases was shown: VWFpp ratio from 7.14 to 17.7, mean 13.02 ± 0.49 – 10 times higher than in the control group (P &lt; 0.001).</p> <p>In Haberichter, 2008, s substantially increased VWFpp/VWF:Ag ratio was predictive of a significantly decreased VWF half-life in 7 individuals who had a &gt;2-fold desmopressin response and an initial VWF:Ag less than 30 IU/dL. 3 individuals had a decreased VWF half-life that was not predicted by an increased VWFpp/VWF:Ag ratio.</p> <p>Individuals who had a substantially increased VWFpp/VWF:Ag ratio and significantly reduced VWF:Ag level were also found to have an enhanced response to desmopressin (greater than 4-fold increase). The desmopressin response was found to correlate with the</p> </td> <td data-bbox="1188 1073 1310 1479">(2 observational studies)</td> <td data-bbox="1316 1073 1415 1479">⊕○○○<br/>VERY LOW<sup>a,b</sup></td> </tr> </tbody> </table> | Outcomes                     | Impact                            | No of participants (studies) | Certainty of the evidence (GRADE) | VWFpp/VWF:Ag ratio correlation with VWF:Ag half life | <p>In Sztukowska, 2008, a pronounced drop in VWF survival in the type Vicenza VWD patients was reported: mean t1/2 significantly lower than in controls (1.3 ± 0.2 h, P &lt; 0.0001). A dramatic increase in VWFpp ratio in the type Vicenza VWD cases was shown: VWFpp ratio from 7.14 to 17.7, mean 13.02 ± 0.49 – 10 times higher than in the control group (P &lt; 0.001).</p> <p>In Haberichter, 2008, s substantially increased VWFpp/VWF:Ag ratio was predictive of a significantly decreased VWF half-life in 7 individuals who had a &gt;2-fold desmopressin response and an initial VWF:Ag less than 30 IU/dL. 3 individuals had a decreased VWF half-life that was not predicted by an increased VWFpp/VWF:Ag ratio.</p> <p>Individuals who had a substantially increased VWFpp/VWF:Ag ratio and significantly reduced VWF:Ag level were also found to have an enhanced response to desmopressin (greater than 4-fold increase). The desmopressin response was found to correlate with the</p> | (2 observational studies) | ⊕○○○<br>VERY LOW <sup>a,b</sup> |  |
| Outcomes                                                                                                                                                                       | Impact                                                                                                                                                                                                                                                                                                                                                                                                                                                                                                                                                                                                                                                                                                                                                                                                                                                                                                                                                                                                                                                                                                                                                                                                                                                                                                                                                                                                                                                                                                                                                                                                                                                                                                                                                                                                                                                                                                                                                                                                                                                                                                                                                                                                                                     | No of participants (studies) | Certainty of the evidence (GRADE) |                              |                                   |                                                      |                                                                                                                                                                                                                                                                                                                                                                                                                                                                                                                                                                                                                                                                                                                                                                                                                                                                                                                                                                                                           |                           |                                 |  |
| VWFpp/VWF:Ag ratio correlation with VWF:Ag half life                                                                                                                           | <p>In Sztukowska, 2008, a pronounced drop in VWF survival in the type Vicenza VWD patients was reported: mean t1/2 significantly lower than in controls (1.3 ± 0.2 h, P &lt; 0.0001). A dramatic increase in VWFpp ratio in the type Vicenza VWD cases was shown: VWFpp ratio from 7.14 to 17.7, mean 13.02 ± 0.49 – 10 times higher than in the control group (P &lt; 0.001).</p> <p>In Haberichter, 2008, s substantially increased VWFpp/VWF:Ag ratio was predictive of a significantly decreased VWF half-life in 7 individuals who had a &gt;2-fold desmopressin response and an initial VWF:Ag less than 30 IU/dL. 3 individuals had a decreased VWF half-life that was not predicted by an increased VWFpp/VWF:Ag ratio.</p> <p>Individuals who had a substantially increased VWFpp/VWF:Ag ratio and significantly reduced VWF:Ag level were also found to have an enhanced response to desmopressin (greater than 4-fold increase). The desmopressin response was found to correlate with the</p>                                                                                                                                                                                                                                                                                                                                                                                                                                                                                                                                                                                                                                                                                                                                                                                                                                                                                                                                                                                                                                                                                                                                                                                                                                  | (2 observational studies)    | ⊕○○○<br>VERY LOW <sup>a,b</sup>   |                              |                                   |                                                      |                                                                                                                                                                                                                                                                                                                                                                                                                                                                                                                                                                                                                                                                                                                                                                                                                                                                                                                                                                                                           |                           |                                 |  |

|                                                                                           |                                                                                                                                                                                                                                                                                                                                                                                                                                                                                                                                                                                                                                                                                                                                                                                                                                                                                                                                                                                                                                                                                                                                                                                                                                                                                                                                                                                                                                                                                                                                                                                                                                                                                      |                           |                                        |  |  |                                                                                           |                                                                                                                                                                                                                                                                                                                                                                                                                                                                                                                                                                                                                                                                                                                                                                                                                                                                                                    |                           |             |  |
|-------------------------------------------------------------------------------------------|--------------------------------------------------------------------------------------------------------------------------------------------------------------------------------------------------------------------------------------------------------------------------------------------------------------------------------------------------------------------------------------------------------------------------------------------------------------------------------------------------------------------------------------------------------------------------------------------------------------------------------------------------------------------------------------------------------------------------------------------------------------------------------------------------------------------------------------------------------------------------------------------------------------------------------------------------------------------------------------------------------------------------------------------------------------------------------------------------------------------------------------------------------------------------------------------------------------------------------------------------------------------------------------------------------------------------------------------------------------------------------------------------------------------------------------------------------------------------------------------------------------------------------------------------------------------------------------------------------------------------------------------------------------------------------------|---------------------------|----------------------------------------|--|--|-------------------------------------------------------------------------------------------|----------------------------------------------------------------------------------------------------------------------------------------------------------------------------------------------------------------------------------------------------------------------------------------------------------------------------------------------------------------------------------------------------------------------------------------------------------------------------------------------------------------------------------------------------------------------------------------------------------------------------------------------------------------------------------------------------------------------------------------------------------------------------------------------------------------------------------------------------------------------------------------------------|---------------------------|-------------|--|
|                                                                                           | <table border="1"> <tr> <td data-bbox="506 89 709 151"></td> <td data-bbox="709 89 1180 151">VWFpp/VWF:Ag ratio (r =0.92, P &lt; .001)</td> <td data-bbox="1180 89 1310 151"></td> <td data-bbox="1310 89 1423 151"></td> </tr> <tr> <td data-bbox="506 151 709 537">Correlation of the VWFpp/VWF:Ag ratio with the presence or absence of a VWF gene mutation</td> <td data-bbox="709 151 1180 537"> <p>In Haberichter, 2006, all affected individuals harbored a VWF gene mutation and showed an increased ratio, whereas no mutation was detected in unaffected individuals. In Eikenboom, 2013, the increased VWFpp/VWF:Ag ratio was particularly raised (median 4.3) in patients with slightly abnormal multimers and mutations. An increased VWFpp/ VWF:Ag ratio was a good predictor of VWD patients with mutations in the VWF gene: a VWFpp/VWF:Ag &gt;3 had a positive predictive value for the presence of a VWF mutation of 98% with a specificity of 99% in the entire cohort of patients and family members. In Stufano, 2019, the genetic analysis of the mutation at codon 1205 in the group (n= 14) with the markedly increased VWF clearance distinguished between VWD type 1 Vicenza (characterized by the presence of the mutation p.R1205H) and AVWS (absence of this mutation).</p> </td> <td data-bbox="1180 151 1310 537">(3 observational studies)</td> <td data-bbox="1310 151 1423 537">⊕⊕○○<br/>LOW</td> </tr> </table> <p>a. The reference test in determining patients with VWD type 1 C is poorly defined</p> <p>b. Studies do not present the number of patients with increased clearance</p> <p>Refer to the Appendix at the end of the document</p> |                           | VWFpp/VWF:Ag ratio (r =0.92, P < .001) |  |  | Correlation of the VWFpp/VWF:Ag ratio with the presence or absence of a VWF gene mutation | <p>In Haberichter, 2006, all affected individuals harbored a VWF gene mutation and showed an increased ratio, whereas no mutation was detected in unaffected individuals. In Eikenboom, 2013, the increased VWFpp/VWF:Ag ratio was particularly raised (median 4.3) in patients with slightly abnormal multimers and mutations. An increased VWFpp/ VWF:Ag ratio was a good predictor of VWD patients with mutations in the VWF gene: a VWFpp/VWF:Ag &gt;3 had a positive predictive value for the presence of a VWF mutation of 98% with a specificity of 99% in the entire cohort of patients and family members. In Stufano, 2019, the genetic analysis of the mutation at codon 1205 in the group (n= 14) with the markedly increased VWF clearance distinguished between VWD type 1 Vicenza (characterized by the presence of the mutation p.R1205H) and AVWS (absence of this mutation).</p> | (3 observational studies) | ⊕⊕○○<br>LOW |  |
|                                                                                           | VWFpp/VWF:Ag ratio (r =0.92, P < .001)                                                                                                                                                                                                                                                                                                                                                                                                                                                                                                                                                                                                                                                                                                                                                                                                                                                                                                                                                                                                                                                                                                                                                                                                                                                                                                                                                                                                                                                                                                                                                                                                                                               |                           |                                        |  |  |                                                                                           |                                                                                                                                                                                                                                                                                                                                                                                                                                                                                                                                                                                                                                                                                                                                                                                                                                                                                                    |                           |             |  |
| Correlation of the VWFpp/VWF:Ag ratio with the presence or absence of a VWF gene mutation | <p>In Haberichter, 2006, all affected individuals harbored a VWF gene mutation and showed an increased ratio, whereas no mutation was detected in unaffected individuals. In Eikenboom, 2013, the increased VWFpp/VWF:Ag ratio was particularly raised (median 4.3) in patients with slightly abnormal multimers and mutations. An increased VWFpp/ VWF:Ag ratio was a good predictor of VWD patients with mutations in the VWF gene: a VWFpp/VWF:Ag &gt;3 had a positive predictive value for the presence of a VWF mutation of 98% with a specificity of 99% in the entire cohort of patients and family members. In Stufano, 2019, the genetic analysis of the mutation at codon 1205 in the group (n= 14) with the markedly increased VWF clearance distinguished between VWD type 1 Vicenza (characterized by the presence of the mutation p.R1205H) and AVWS (absence of this mutation).</p>                                                                                                                                                                                                                                                                                                                                                                                                                                                                                                                                                                                                                                                                                                                                                                                   | (3 observational studies) | ⊕⊕○○<br>LOW                            |  |  |                                                                                           |                                                                                                                                                                                                                                                                                                                                                                                                                                                                                                                                                                                                                                                                                                                                                                                                                                                                                                    |                           |             |  |

## Desirable Effects

How substantial are the desirable anticipated effects?

| JUDGEMENT                                                                                                                                                 | RESEARCH EVIDENCE                                                                                                                                                                                                                                                                                                                                                                                                                                                                                                                                                                                                                                                                                                                                                                                                                                                                                                                                                                                                                      | ADDITIONAL CONSIDERATIONS |
|-----------------------------------------------------------------------------------------------------------------------------------------------------------|----------------------------------------------------------------------------------------------------------------------------------------------------------------------------------------------------------------------------------------------------------------------------------------------------------------------------------------------------------------------------------------------------------------------------------------------------------------------------------------------------------------------------------------------------------------------------------------------------------------------------------------------------------------------------------------------------------------------------------------------------------------------------------------------------------------------------------------------------------------------------------------------------------------------------------------------------------------------------------------------------------------------------------------|---------------------------|
| <ul style="list-style-type: none"> <li>○ Trivial</li> <li>○ Small</li> <li>○ Moderate</li> <li>○ Large</li> <li>○ Varies</li> <li>● Don't know</li> </ul> | <p><b>True Positive:</b> These are patients who have VWD type 1C and who received preventive and appropriate treatment. They benefit from decreasing the risk of bleeding with treatment and they suffer the side effects of treatment.</p> <p><b>True Negative:</b> These are patients who did not have VWD type 1C and who were correctly identified as not having the disease. They will appropriately not receive treatment for VWD type 1C and not suffer the side effects of treatment.</p> <p><b>False Negative:</b> These are patients who have VWD type 1C but the diagnosis was missed and will be sent home without appropriate treatment. They face the risks of prolonged and heavy bleeding due to not receiving treatment.</p> <p><b>False Positive:</b> These are patients who did not have VWD type 1C but they will be labeled as having VWD but will be identified as not having VWD on blood testing. They may benefit from the treatment if they have other bleeding disorders, but they suffer side effects.</p> |                           |

|  |                                                  |  |
|--|--------------------------------------------------|--|
|  | Refer to the Appendix at the end of the document |  |
|--|--------------------------------------------------|--|

**Undesirable Effects**  
How substantial are the undesirable anticipated effects?

| JUDGEMENT                                                                                                                                                 | RESEARCH EVIDENCE                                                                                                                                                                                                                                                                                                                                                                                                                                                                                                                                                                                                                                                                                                                                                                                                                                                                                                                                                                                                                                                                              | ADDITIONAL CONSIDERATIONS |
|-----------------------------------------------------------------------------------------------------------------------------------------------------------|------------------------------------------------------------------------------------------------------------------------------------------------------------------------------------------------------------------------------------------------------------------------------------------------------------------------------------------------------------------------------------------------------------------------------------------------------------------------------------------------------------------------------------------------------------------------------------------------------------------------------------------------------------------------------------------------------------------------------------------------------------------------------------------------------------------------------------------------------------------------------------------------------------------------------------------------------------------------------------------------------------------------------------------------------------------------------------------------|---------------------------|
| <ul style="list-style-type: none"> <li>○ Large</li> <li>○ Moderate</li> <li>○ Small</li> <li>○ Trivial</li> <li>○ Varies</li> <li>● Don't know</li> </ul> | <p><b>True Positive:</b> These are patients who have VWD type 1C and who received preventive and appropriate treatment. They benefit from decreasing the risk of bleeding with treatment and they suffer the side effects of treatment.</p> <p><b>True Negative:</b> These are patients who did not have VWD type 1C and who were correctly identified as not having the disease. They will appropriately not receive treatment for VWD type 1C and not suffer the side effects of treatment.</p> <p><b>False Negative:</b> These are patients who have VWD type 1C but the diagnosis was missed and will be sent home without appropriate treatment. They face the risks of prolonged and heavy bleeding due to not receiving treatment.</p> <p><b>False Positive:</b> These are patients who did not have VWD type 1C but they will be labeled as having VWD but will be identified as not having VWD on blood testing. They may benefit from the treatment if they have other bleeding disorders, but they suffer side effects.</p> <p>Refer to the Appendix at the end of the document</p> |                           |

**Certainty of the evidence of test accuracy**  
What is the overall certainty of the evidence of test accuracy?

| JUDGEMENT                                                                                                                                      | RESEARCH EVIDENCE                                 | ADDITIONAL CONSIDERATIONS                                                                                                                                                                                                                                                                                          |
|------------------------------------------------------------------------------------------------------------------------------------------------|---------------------------------------------------|--------------------------------------------------------------------------------------------------------------------------------------------------------------------------------------------------------------------------------------------------------------------------------------------------------------------|
| <ul style="list-style-type: none"> <li>● Very low</li> <li>○ Low</li> <li>○ Moderate</li> <li>○ High</li> <li>○ No included studies</li> </ul> | Refer to the Appendix at the end of the document. | The way we look at the test is affected by the definition of what is considered to have increased clearance: the increased clearance is a phenotypic characteristic and when it is defined genotypically, different mutations will have different phenotypes that are not well defined (because the mutations were |

|  |  |                                                                                                                                                |
|--|--|------------------------------------------------------------------------------------------------------------------------------------------------|
|  |  | identified based on increased propeptide ratio, so they are non-validated mutations), making mutation analysis a poor reference standard test. |
|--|--|------------------------------------------------------------------------------------------------------------------------------------------------|

**Certainty of the evidence of test's effects**  
 What is the overall certainty of the evidence for any critical or important direct benefits, adverse effects or burden of the test?

| JUDGEMENT                                                                                                                                      | RESEARCH EVIDENCE                                                              | ADDITIONAL CONSIDERATIONS                                                                                                                                                                                                                                                                                                                                                                                                  |
|------------------------------------------------------------------------------------------------------------------------------------------------|--------------------------------------------------------------------------------|----------------------------------------------------------------------------------------------------------------------------------------------------------------------------------------------------------------------------------------------------------------------------------------------------------------------------------------------------------------------------------------------------------------------------|
| <ul style="list-style-type: none"> <li>○ Very low</li> <li>○ Low</li> <li>○ Moderate</li> <li>○ High</li> <li>● No included studies</li> </ul> | Both interventions are blood tests that do not have any test's direct effects. | The panel discussed that a propeptide to antigen ratio assessment is not a replacement for desmopressin trial, because sometimes the propeptide is normal and the desmopressin trial is abnormal. However, the propeptide ratio can still be used if the patient cannot receive desmopressin (e.g. in pediatrics due to logistic difficulty in serial blood draws) or the patient refuses the desmopressin challenge test. |

**Certainty of the evidence of management's effects**  
 What is the overall certainty of the evidence of effects of the management that is guided by the test results?

| JUDGEMENT                                                                                                                                      | RESEARCH EVIDENCE | ADDITIONAL CONSIDERATIONS                                                                                                                                                                                                                                                                                                                                                                                                                                                                                                                                                       |
|------------------------------------------------------------------------------------------------------------------------------------------------|-------------------|---------------------------------------------------------------------------------------------------------------------------------------------------------------------------------------------------------------------------------------------------------------------------------------------------------------------------------------------------------------------------------------------------------------------------------------------------------------------------------------------------------------------------------------------------------------------------------|
| <ul style="list-style-type: none"> <li>○ Very low</li> <li>○ Low</li> <li>○ Moderate</li> <li>○ High</li> <li>● No included studies</li> </ul> |                   | Both interventions are needed, not only to identify patients with increased clearance (propeptide ratio), but also to determine the treatment plan (Desmopressin might not be the optimal treatment option for those patients because of very short half-life, but can be used for minor bleeding even with the short half-life). Currently, the desmopressin trial is still done because the response to desmopressin cannot be predicted without the trial, whereas propeptide may be informative but cannot answer the question on which treatment will benefit the patient. |

**Certainty of the evidence of test result/management**  
 How certain is the link between test results and management decisions?

| JUDGEMENT                                                                                                                                      | RESEARCH EVIDENCE                                 | ADDITIONAL CONSIDERATIONS |
|------------------------------------------------------------------------------------------------------------------------------------------------|---------------------------------------------------|---------------------------|
| <ul style="list-style-type: none"> <li>○ Very low</li> <li>○ Low</li> <li>○ Moderate</li> <li>○ High</li> <li>● No included studies</li> </ul> | Refer to the Appendix at the end of the document. |                           |

### Certainty of effects

What is the overall certainty of the evidence of effects of the test?

| JUDGEMENT                                                                                                                                      | RESEARCH EVIDENCE                                 | ADDITIONAL CONSIDERATIONS |
|------------------------------------------------------------------------------------------------------------------------------------------------|---------------------------------------------------|---------------------------|
| <ul style="list-style-type: none"> <li>● Very low</li> <li>○ Low</li> <li>○ Moderate</li> <li>○ High</li> <li>○ No included studies</li> </ul> | Refer to the Appendix at the end of the document. |                           |

### Values

Is there important uncertainty about or variability in how much people value the main outcomes?

| JUDGEMENT                                                                                                                                                                                                                                                        | RESEARCH EVIDENCE | ADDITIONAL CONSIDERATIONS                                                                                                                                                                                                                                                                                                                                                                                                                                                                                                                                                                                                                                                                                                                                                                       |
|------------------------------------------------------------------------------------------------------------------------------------------------------------------------------------------------------------------------------------------------------------------|-------------------|-------------------------------------------------------------------------------------------------------------------------------------------------------------------------------------------------------------------------------------------------------------------------------------------------------------------------------------------------------------------------------------------------------------------------------------------------------------------------------------------------------------------------------------------------------------------------------------------------------------------------------------------------------------------------------------------------------------------------------------------------------------------------------------------------|
| <ul style="list-style-type: none"> <li>○ Important uncertainty or variability</li> <li>● Possibly important uncertainty or variability</li> <li>○ Probably no important uncertainty or variability</li> <li>○ No important uncertainty or variability</li> </ul> |                   | <p>VWFpp/VWF:Ag ratio is preferred by the majority because of convenience in avoiding the adverse effects of desmopressin, especially with the multiple blood draws (pediatric population) and the four hour fall off which is less convenient, seeing the patient availability and time commitment. However, some patients may desire to know if they will respond to desmopressin especially with the limited availability of VWFpp/VWF:Ag (only available in 2-3 sites in the US). The possibility to avoid plasma products may be valued; some patients prefer to learn about a test that is "new" (since the 2008 NIH: NHLBI VWD guideline) such as VWF propeptide, which is possibly the easiest alternative from the patient's point of view, as it consists of a single blood draw.</p> |

|  |  |                                                                                                                                                                                                                                                                          |
|--|--|--------------------------------------------------------------------------------------------------------------------------------------------------------------------------------------------------------------------------------------------------------------------------|
|  |  | In a patient affected by VWF Type 1 whose insurance would not cover the cost of a desmopressin 4-hr trial, patients wonder whether a propeptide ratio assay would be a logical step in a diagnostic workup, especially if a family member was known to have Type 1C VWD. |
|--|--|--------------------------------------------------------------------------------------------------------------------------------------------------------------------------------------------------------------------------------------------------------------------------|

**Balance of effects**  
Does the balance between desirable and undesirable effects favor the intervention or the comparison?

| JUDGEMENT                                                                                                                                                                                                                                                                                                      | RESEARCH EVIDENCE                                 | ADDITIONAL CONSIDERATIONS |
|----------------------------------------------------------------------------------------------------------------------------------------------------------------------------------------------------------------------------------------------------------------------------------------------------------------|---------------------------------------------------|---------------------------|
| <ul style="list-style-type: none"> <li>● Favors the comparison</li> <li>○ Probably favors the comparison</li> <li>○ Does not favor either the intervention or the comparison</li> <li>○ Probably favors the intervention</li> <li>○ Favors the intervention</li> <li>○ Varies</li> <li>○ Don't know</li> </ul> | Refer to the Appendix at the end of the document. |                           |

**Resources required**  
How large are the resource requirements (costs)?

| JUDGEMENT                                                                                                                                                                                                                      | RESEARCH EVIDENCE                                                                                                                                                                                                                                                                                                                                                                                                                                                                                                                       | ADDITIONAL CONSIDERATIONS |
|--------------------------------------------------------------------------------------------------------------------------------------------------------------------------------------------------------------------------------|-----------------------------------------------------------------------------------------------------------------------------------------------------------------------------------------------------------------------------------------------------------------------------------------------------------------------------------------------------------------------------------------------------------------------------------------------------------------------------------------------------------------------------------------|---------------------------|
| <ul style="list-style-type: none"> <li>○ Large costs</li> <li>○ Moderate costs</li> <li>○ Negligible costs and savings</li> <li>● Moderate savings</li> <li>○ Large savings</li> <li>○ Varies</li> <li>○ Don't know</li> </ul> | <p>VWF propeptide cost: Europe €50.</p> <p>Desmopressin trial cost:</p> <ul style="list-style-type: none"> <li>● Australia \$400-500</li> <li>● USA \$1000 (nursing time, lab costs, costs of IV tubing, and cost to have a patient in an outpatient clinic included).</li> <li>● Europe €300.</li> </ul> <p>There is considerable variability in cost among different jurisdictions. Cost is also affected by different factors including insurance plans. The estimate provided are based on the clinical experts best estimates.</p> |                           |

**Certainty of evidence of required resources**  
What is the certainty of the evidence of resource requirements (costs)?



| JUDGEMENT                                                                                                                                      | RESEARCH EVIDENCE | ADDITIONAL CONSIDERATIONS |
|------------------------------------------------------------------------------------------------------------------------------------------------|-------------------|---------------------------|
| <ul style="list-style-type: none"> <li>○ Very low</li> <li>○ Low</li> <li>○ Moderate</li> <li>○ High</li> <li>● No included studies</li> </ul> |                   |                           |

**Cost effectiveness**

Does the cost-effectiveness of the intervention favor the intervention or the comparison?

| JUDGEMENT                                                                                                                                                                                                                                                                                                               | RESEARCH EVIDENCE | ADDITIONAL CONSIDERATIONS |
|-------------------------------------------------------------------------------------------------------------------------------------------------------------------------------------------------------------------------------------------------------------------------------------------------------------------------|-------------------|---------------------------|
| <ul style="list-style-type: none"> <li>○ Favors the comparison</li> <li>○ Probably favors the comparison</li> <li>○ Does not favor either the intervention or the comparison</li> <li>○ Probably favors the intervention</li> <li>○ Favors the intervention</li> <li>○ Varies</li> <li>● No included studies</li> </ul> |                   |                           |

**Equity**

What would be the impact on health equity?

| JUDGEMENT                                                                                                                                                                                                        | RESEARCH EVIDENCE | ADDITIONAL CONSIDERATIONS                                                                                                                                                                                                                                                                                                                                 |
|------------------------------------------------------------------------------------------------------------------------------------------------------------------------------------------------------------------|-------------------|-----------------------------------------------------------------------------------------------------------------------------------------------------------------------------------------------------------------------------------------------------------------------------------------------------------------------------------------------------------|
| <ul style="list-style-type: none"> <li>○ Reduced</li> <li>● Probably reduced</li> <li>○ Probably no impact</li> <li>○ Probably increased</li> <li>○ Increased</li> <li>○ Varies</li> <li>○ Don't know</li> </ul> |                   | <p>VWF propeptide is not always covered by insurance. However, in the UK it could be covered, possibly with an explanation for conducting the test, with most of these tests being done under NHS cost.</p> <p>Desmopressin trials are covered by insurance but may have a very high deductible.</p> <p>Patients with access problems and people with</p> |

|  |  |                                                                                                                                                                                                                                                                                                                                                                            |
|--|--|----------------------------------------------------------------------------------------------------------------------------------------------------------------------------------------------------------------------------------------------------------------------------------------------------------------------------------------------------------------------------|
|  |  | no health insurance are disadvantaged (including transportation issues in poorer patients). Also, taking a day off from work/school and travel for the desmopressin trial would be a definite barrier for some. The interpretation of the results in each alternative has differences and therefore may influence the correct diagnosis if both options are not available. |
|--|--|----------------------------------------------------------------------------------------------------------------------------------------------------------------------------------------------------------------------------------------------------------------------------------------------------------------------------------------------------------------------------|

**Acceptability**  
Is the intervention acceptable to key stakeholders?

| JUDGEMENT                                                                                                                                                                                                                                                                                       | RESEARCH EVIDENCE                                                                                                                                                                                                                                                                                                                                                                                                                                                                                                  | ADDITIONAL CONSIDERATIONS |
|-------------------------------------------------------------------------------------------------------------------------------------------------------------------------------------------------------------------------------------------------------------------------------------------------|--------------------------------------------------------------------------------------------------------------------------------------------------------------------------------------------------------------------------------------------------------------------------------------------------------------------------------------------------------------------------------------------------------------------------------------------------------------------------------------------------------------------|---------------------------|
| <ul style="list-style-type: none"> <li><input type="radio"/> No</li> <li><input type="radio"/> Probably no</li> <li><input checked="" type="radio"/> Probably yes</li> <li><input type="radio"/> Yes</li> <li><input type="radio"/> Varies</li> <li><input type="radio"/> Don't know</li> </ul> | <p>Patients usually accept having desmopressin trial once the rationale is explained and that it is a test that is conducted once. So, good communication, counseling on how the test is done and possible side effects and symptoms are required.</p> <p>Some patients who carry a diagnosis and have had desmopressin before, but have never had their levels appropriately checked before/after, may be reluctant. The reasons not to accept the test include side effects and available time (Batty, 2017)</p> |                           |

**Feasibility**  
Is the intervention feasible to implement?

| JUDGEMENT                                                                                                                                                                                                                                                                                       | RESEARCH EVIDENCE | ADDITIONAL CONSIDERATIONS                                                                                                                                                                                                                                                                                                                                                                                                                                                                                                       |
|-------------------------------------------------------------------------------------------------------------------------------------------------------------------------------------------------------------------------------------------------------------------------------------------------|-------------------|---------------------------------------------------------------------------------------------------------------------------------------------------------------------------------------------------------------------------------------------------------------------------------------------------------------------------------------------------------------------------------------------------------------------------------------------------------------------------------------------------------------------------------|
| <ul style="list-style-type: none"> <li><input type="radio"/> No</li> <li><input checked="" type="radio"/> Probably no</li> <li><input type="radio"/> Probably yes</li> <li><input type="radio"/> Yes</li> <li><input type="radio"/> Varies</li> <li><input type="radio"/> Don't know</li> </ul> |                   | <p>VWFpp/VWF:Ag is not available in all hospitals. It is usually available in research-active departments and specialized laboratories, which are few around the world, but has a limited availability otherwise. One of the potential outcomes of this question is that it might prompt more labs to start offering the test.</p> <p>The desmopressin trial is done differently between different centers with different timeframes considered. The desmopressin trial is used in different ways too, it will let treating</p> |



|                                                     | JUDGEMENT                            |                                                      |                                                          |                                         |                         |        |                            |
|-----------------------------------------------------|--------------------------------------|------------------------------------------------------|----------------------------------------------------------|-----------------------------------------|-------------------------|--------|----------------------------|
| TEST ACCURACY                                       | Very inaccurate                      | Inaccurate                                           | Accurate                                                 | Very accurate                           |                         | Varies | <b>Don't know</b>          |
| DESIRABLE EFFECTS                                   | Trivial                              | Small                                                | Moderate                                                 | Large                                   |                         | Varies | <b>Don't know</b>          |
| UNDESIRABLE EFFECTS                                 | Large                                | Moderate                                             | Small                                                    | Trivial                                 |                         | Varies | <b>Don't know</b>          |
| CERTAINTY OF THE EVIDENCE OF TEST ACCURACY          | <b>Very low</b>                      | Low                                                  | Moderate                                                 | High                                    |                         |        | No included studies        |
| CERTAINTY OF THE EVIDENCE OF TEST'S EFFECTS         | Very low                             | Low                                                  | Moderate                                                 | High                                    |                         |        | <b>No included studies</b> |
| CERTAINTY OF THE EVIDENCE OF MANAGEMENT'S EFFECTS   | Very low                             | Low                                                  | Moderate                                                 | High                                    |                         |        | <b>No included studies</b> |
| CERTAINTY OF THE EVIDENCE OF TEST RESULT/MANAGEMENT | Very low                             | Low                                                  | Moderate                                                 | High                                    |                         |        | <b>No included studies</b> |
| CERTAINTY OF EFFECTS                                | <b>Very low</b>                      | Low                                                  | Moderate                                                 | High                                    |                         |        | No included studies        |
| VALUES                                              | Important uncertainty or variability | <b>Possibly important uncertainty or variability</b> | Probably no important uncertainty or variability         | No important uncertainty or variability |                         |        |                            |
| BALANCE OF EFFECTS                                  | <b>Favors the comparison</b>         | Probably favors the comparison                       | Does not favor either the intervention or the comparison | Probably favors the intervention        | Favors the intervention | Varies | Don't know                 |
| RESOURCES REQUIRED                                  | Large costs                          | Moderate costs                                       | Negligible costs and savings                             | <b>Moderate savings</b>                 | Large savings           | Varies | Don't know                 |
| CERTAINTY OF EVIDENCE OF REQUIRED RESOURCES         | Very low                             | Low                                                  | Moderate                                                 | High                                    |                         |        | <b>No included studies</b> |
| COST EFFECTIVENESS                                  | Favors the                           | Probably favors                                      | Does not favor                                           | Probably favors                         | Favors the              | Varies | <b>No included</b>         |

|               | JUDGEMENT  |                         |                                           |                    |              |        |            |
|---------------|------------|-------------------------|-------------------------------------------|--------------------|--------------|--------|------------|
|               | comparison | the comparison          | either the intervention or the comparison | the intervention   | intervention |        | studies    |
| EQUITY        | Reduced    | <b>Probably reduced</b> | Probably no impact                        | Probably increased | Increased    | Varies | Don't know |
| ACCEPTABILITY | No         | Probably no             | <b>Probably yes</b>                       | Yes                |              | Varies | Don't know |
| FEASIBILITY   | No         | <b>Probably no</b>      | Probably yes                              | Yes                |              | Varies | Don't know |

#### TYPE OF RECOMMENDATION

|                                                     |                                                                 |                                                                               |                                                      |                                                 |
|-----------------------------------------------------|-----------------------------------------------------------------|-------------------------------------------------------------------------------|------------------------------------------------------|-------------------------------------------------|
| Strong recommendation against the intervention<br>○ | <b>Conditional recommendation against the intervention</b><br>● | Conditional recommendation for either the intervention or the comparison<br>○ | Conditional recommendation for the intervention<br>○ | Strong recommendation for the intervention<br>○ |
|-----------------------------------------------------|-----------------------------------------------------------------|-------------------------------------------------------------------------------|------------------------------------------------------|-------------------------------------------------|

#### CONCLUSIONS

##### Recommendation

The panel suggests against using the VWFpp/VWF:Ag (ratio of VWF propeptide to antigen), and rather using a desmopressin trial with 1 and 4-hour post-infusion blood work, to confirm diagnosis in patients with VWD suspected of Type 1C.  
(Conditional recommendation based on low certainty in the evidence)

Good practice statement:

- Desmopressin responsiveness should be confirmed before it is used clinically in the management of patients with VWD.

##### Justification

The guideline panel determined that there is low certainty in the evidence for a net health benefit from using the desmopressin trial with a 1 and 4-hour bloodwork in patients suspected of type 1C VWD over using propeptide ratio. Other EtD criteria were generally in favor of using desmopressin trial with 1 and 4-hour bloodwork, so that the desirable consequences were greater than the undesirable consequences.

##### Subgroup considerations

## Implementation considerations

## Monitoring and evaluation

## Research priorities

- Data about the Propeptide/antigen ratio
- Data about desmopressin trial with bloodwork at 4 hours.

## APPENDIX

### 1. Risk of bias:

| Author             | Risk of bias population selection | Risk of bias index test | Risk of bias reference test <sup>a</sup> | Flow and timing Risk of bias |
|--------------------|-----------------------------------|-------------------------|------------------------------------------|------------------------------|
| Sztukowska, 2008   | High                              | Low                     | Low                                      | Low                          |
| Haberichter, 2006  | Low                               | Low                     | High                                     | Low                          |
| Eikenboom, 2013    | Low                               | Low                     | High                                     | Low                          |
| Haberrichter, 2008 | Low                               | Low                     | High                                     | Low                          |
| Stufano, 2019      | Low                               | Low                     | Low                                      | Low                          |

a. Reference test determining patients with increased clearance not clearly defined.

### 2. Outcomes:

➤ *Correlations:*

| Certainty assessment                                 |              |              |               |              |             |                      | Impact | Certainty |
|------------------------------------------------------|--------------|--------------|---------------|--------------|-------------|----------------------|--------|-----------|
| No of studies                                        | Study design | Risk of bias | Inconsistency | Indirectness | Imprecision | Other considerations |        |           |
| VWFpp/VWF:Ag ratio correlation with VWF:Ag half life |              |              |               |              |             |                      |        |           |

VWFpp/VWF:Ag ratio correlation with VWF:Ag half life

|   |                       |                      |             |                      |             |      |                                                                                                                                                                                                                                                                                                                                                                                                                                                                                                                                                                                                                                                                                                                                                                                                                                                                                                                                                                                                                                                                                                                                   |                  |
|---|-----------------------|----------------------|-------------|----------------------|-------------|------|-----------------------------------------------------------------------------------------------------------------------------------------------------------------------------------------------------------------------------------------------------------------------------------------------------------------------------------------------------------------------------------------------------------------------------------------------------------------------------------------------------------------------------------------------------------------------------------------------------------------------------------------------------------------------------------------------------------------------------------------------------------------------------------------------------------------------------------------------------------------------------------------------------------------------------------------------------------------------------------------------------------------------------------------------------------------------------------------------------------------------------------|------------------|
| 2 | observational studies | serious <sup>a</sup> | not serious | serious <sup>b</sup> | not serious | none | <p>In Sztukowska, 2008, a pronounced drop in VWF survival in the type Vicenza VWD patients was reported: mean t1/2 significantly lower than in controls (<math>1.3 \pm 0.2</math> h, <math>P &lt; 0.0001</math>). A dramatic increase in VWFpp ratio in the type Vicenza VWD cases was shown: VWFpp ratio from 7.14 to 17.7, mean <math>13.02 \pm 0.49</math> – 10 times higher than in the control group (<math>P &lt; 0.001</math>).</p> <p>In Haberichter, 2008, s substantially increased VWFpp/VWF:Ag ratio was predictive of a significantly decreased VWF half-life in 7 individuals who had a &gt;2-fold desmopressin response and an initial VWF:Ag less than 30 IU/dL. 3 individuals had a decreased VWF half-life that was not predicted by an increased VWFpp/VWF:Ag ratio. Individuals who had a substantially increased VWFpp/VWF:Ag ratio and significantly reduced VWF:Ag level were also found to have an enhanced response to desmopressin (greater than 4-fold increase). The desmopressin response was found to correlate with the VWFpp/VWF:Ag ratio (<math>r = -0.92</math>, <math>P &lt; .001</math>).</p> | ⊕○○○<br>VERY LOW |
|---|-----------------------|----------------------|-------------|----------------------|-------------|------|-----------------------------------------------------------------------------------------------------------------------------------------------------------------------------------------------------------------------------------------------------------------------------------------------------------------------------------------------------------------------------------------------------------------------------------------------------------------------------------------------------------------------------------------------------------------------------------------------------------------------------------------------------------------------------------------------------------------------------------------------------------------------------------------------------------------------------------------------------------------------------------------------------------------------------------------------------------------------------------------------------------------------------------------------------------------------------------------------------------------------------------|------------------|

**Correlation of the VWFpp/VWF:Ag ratio with the presence or absence of a VWF gene mutation**

|   |                       |             |             |             |             |      |                                                                                                                                                                                                                                                                                                                                                                                                                                                                                                                                                                                                                                                                                                                                                                                                                                                                                                                   |             |
|---|-----------------------|-------------|-------------|-------------|-------------|------|-------------------------------------------------------------------------------------------------------------------------------------------------------------------------------------------------------------------------------------------------------------------------------------------------------------------------------------------------------------------------------------------------------------------------------------------------------------------------------------------------------------------------------------------------------------------------------------------------------------------------------------------------------------------------------------------------------------------------------------------------------------------------------------------------------------------------------------------------------------------------------------------------------------------|-------------|
| 3 | observational studies | not serious | not serious | not serious | not serious | none | <p>In Haberichter, 2006, all affected individuals harbored a VWF gene mutation and showed an increased ratio, whereas no mutation was detected in unaffected individuals.</p> <p>In Eikenboom, 2013, the increased VWFpp/ VWF:Ag ratio was particularly raised (median 4.3) in patients with slightly abnormal multimers and mutations. An increased VWFpp/ VWF:Ag ratio was a good predictor of VWD patients with mutations in the VWF gene: a VWFpp/VWF:Ag &gt;3 had a positive predictive value for the presence of a VWF mutation of 98% with a specificity of 99% in the entire cohort of patients and family members.</p> <p>In Stufano, 2019, the genetic analysis of the mutation at codon 1205 in the group (n= 14) with the markedly increased VWF clearance distinguished between VWD type 1 Vicenza (characterized by the presence of the mutation p.R1205H) and AVWS (absence of this mutation).</p> | ⊕⊕○○<br>LOW |
|---|-----------------------|-------------|-------------|-------------|-------------|------|-------------------------------------------------------------------------------------------------------------------------------------------------------------------------------------------------------------------------------------------------------------------------------------------------------------------------------------------------------------------------------------------------------------------------------------------------------------------------------------------------------------------------------------------------------------------------------------------------------------------------------------------------------------------------------------------------------------------------------------------------------------------------------------------------------------------------------------------------------------------------------------------------------------------|-------------|

CI: Confidence interval

**Explanations**

- a. The reference test in determining patients with VWD type 1 C is poorly defined
- b. Studies do not present the number of patients with increased clearance

➤ **Test accuracy results:**

|              |                                                |
|--------------|------------------------------------------------|
| VWFpp/VWF:Ag | Desmopressin trial with 1 and 4 hour bloodwork |
|--------------|------------------------------------------------|

|             |    |    |     |
|-------------|----|----|-----|
| Prevalences | 1% | 3% | 50% |
|-------------|----|----|-----|



|             |              |             |              |
|-------------|--------------|-------------|--------------|
| Sensitivity | 0.88 to 1.00 | Sensitivity | 0.99 to 1.00 |
| Specificity | 0.92 to 1.00 | Specificity | 0.70 to 0.70 |

| Outcome                                                                            | No of studies (No of patients) | Study design                                 | Factors that may decrease certainty of evidence |                      |               |             |                  | Effect per 1,000 patients tested                 |                                                   |                                                  |                                                   |                                                  |                                                   | Test accuracy CoE |
|------------------------------------------------------------------------------------|--------------------------------|----------------------------------------------|-------------------------------------------------|----------------------|---------------|-------------|------------------|--------------------------------------------------|---------------------------------------------------|--------------------------------------------------|---------------------------------------------------|--------------------------------------------------|---------------------------------------------------|-------------------|
|                                                                                    |                                |                                              |                                                 |                      |               |             |                  | pre-test probability of 1%                       |                                                   | pre-test probability of 3%                       |                                                   | pre-test probability of 50%                      |                                                   |                   |
|                                                                                    |                                |                                              | Risk of bias                                    | Indirectness         | Inconsistency | Imprecision | Publication bias | VWFpp/VWF:Ag                                     | Desmopressin in trial with 1 and 4 hour bloodwork | VWFpp/VWF:Ag                                     | Desmopressin in trial with 1 and 4 hour bloodwork | VWFpp/VWF:Ag                                     | Desmopressin in trial with 1 and 4 hour bloodwork |                   |
| <b>True positives</b> (patients with VWD type 1C)                                  | 3 studies<br>68 patients       | cross-sectional (cohort type accuracy study) | serious <sup>a</sup>                            | serious <sup>b</sup> | not serious   | not serious | none             | 9 to 10                                          | 10 to 10                                          | 26 to 30                                         | 30 to 30                                          | 440 to 500                                       | 495 to 500                                        | ⊕⊕○<br>○<br>LOW   |
|                                                                                    |                                |                                              |                                                 |                      |               |             |                  | <b>1 fewer to 0 fewer TP in VWFpp/VWF:Ag</b>     |                                                   | <b>4 fewer to 0 fewer TP in VWFpp/VWF:Ag</b>     |                                                   | <b>55 fewer to 0 fewer TP in VWFpp/VWF:Ag</b>    |                                                   |                   |
|                                                                                    |                                |                                              |                                                 |                      |               |             |                  | 0 to 1                                           | 0 to 0                                            | 0 to 4                                           | 0 to 0                                            | 0 to 60                                          | 0 to 5                                            |                   |
| <b>False negatives</b> (patients incorrectly classified as not having VWD type 1C) | 3 studies<br>193 patients      | cross-sectional (cohort type accuracy study) | serious <sup>a</sup>                            | serious <sup>b</sup> | not serious   | not serious | none             | 911 to 990                                       | 693 to 693                                        | 892 to 970                                       | 679 to 679                                        | 460 to 500                                       | 350 to 350                                        | ⊕⊕○<br>○<br>LOW   |
|                                                                                    |                                |                                              |                                                 |                      |               |             |                  | <b>218 more to 297 more TN in VWFpp/VWF:Ag</b>   |                                                   | <b>213 more to 291 more TN in VWFpp/VWF:Ag</b>   |                                                   | <b>110 more to 150 more TN in VWFpp/VWF:Ag</b>   |                                                   |                   |
|                                                                                    |                                |                                              |                                                 |                      |               |             |                  | 0 to 79                                          | 297 to 297                                        | 0 to 78                                          | 291 to 291                                        | 0 to 40                                          | 150 to 150                                        |                   |
| <b>False positives</b> (patients incorrectly classified as having VWD type 1C)     | 3 studies<br>68 patients       | cross-sectional (cohort type accuracy study) | serious <sup>a</sup>                            | serious <sup>b</sup> | not serious   | not serious | none             | 9 to 10                                          | 10 to 10                                          | 26 to 30                                         | 30 to 30                                          | 440 to 500                                       | 495 to 500                                        | ⊕⊕○<br>○<br>LOW   |
|                                                                                    |                                |                                              |                                                 |                      |               |             |                  | <b>1 more to 0 fewer FN in VWFpp/VWF:Ag</b>      |                                                   | <b>4 more to 0 fewer FN in VWFpp/VWF:Ag</b>      |                                                   | <b>55 more to 0 fewer FN in VWFpp/VWF:Ag</b>     |                                                   |                   |
|                                                                                    |                                |                                              |                                                 |                      |               |             |                  | 0 to 1                                           | 0 to 0                                            | 0 to 4                                           | 0 to 0                                            | 0 to 60                                          | 0 to 5                                            |                   |
| <b>True negatives</b> (patients without VWD type 1C)                               | 3 studies<br>193 patients      | cross-sectional (cohort type accuracy study) | serious <sup>a</sup>                            | serious <sup>b</sup> | not serious   | not serious | none             | 911 to 990                                       | 693 to 693                                        | 892 to 970                                       | 679 to 679                                        | 460 to 500                                       | 350 to 350                                        | ⊕⊕○<br>○<br>LOW   |
|                                                                                    |                                |                                              |                                                 |                      |               |             |                  | <b>218 fewer to 297 fewer FP in VWFpp/VWF:Ag</b> |                                                   | <b>213 fewer to 291 fewer FP in VWFpp/VWF:Ag</b> |                                                   | <b>110 fewer to 150 fewer FP in VWFpp/VWF:Ag</b> |                                                   |                   |
|                                                                                    |                                |                                              |                                                 |                      |               |             |                  | 0 to 79                                          | 297 to 297                                        | 0 to 78                                          | 291 to 291                                        | 0 to 40                                          | 150 to 150                                        |                   |

### Explanations

a. Not all studies describe how the reference standard was conducted and interpreted

b. The 2 interventions are not compared together in the included studies. the desmopressin trial was not done at 1 and 4 hours. VWF:Ag half-life results from the desmopressin trial were used to calculate test accuracy results

c. Typically seen in patients investigated for VWD because of a personal history of abnormal laboratory test (e.g., increased PTT).

- d. Typically seen in patients investigated for VWD because of a personal history of bleeding symptoms (e.g., mucocutaneous bleeding). - Quiroga, 2007.
- e. Typically seen in patients investigated for VWD as a first degree relative for a patient with VWD.

## References

1. Eikenboom J, Federici AB, Dirven RJ, et al. VWF propeptide and ratios between VWF, VWF propeptide, and FVIII in the characterization of type 1 von Willebrand disease. *Blood*. 2013;121(12):2336-2339.
2. Sztukowska M, Gallinaro L, Cattini M, G., Pontara E, Sartorello F, Daidone V, Padrini R, Pagnan A, Casonato A. Von Willebrand factor propeptide makes it easy to identify the shorter Von Willebrand factor survival in patients with type 1 and type 2 von Willebrand disease. *Br J Haematol*. 2008;143(1):107-114.
3. Haberichter SL, Castaman G, Budde U, Peake I, Goodeve A, Rodeghiero F, Federici A, B., Batlle J, Meyer D, Mazurier C, Goudemand J, Eikenboom J, Schnepfenheim R, Ingerslev J, Vorlova Z, Habart D, Holmberg L, Lethagen S, Pasi J, Hill F, G., Montgomery R, R. Identification of type 1 von Willebrand disease patients with reduced von Willebrand factor survival by assay of the VWF propeptide in the European study: molecular and clinical markers for the diagnosis and management of type 1 VWD (MCMDM-1VWD). *Blood*. 2008;111(10):4979-4985.
4. Haberichter SL, Balistreri M, Christopherson P, et al. Assay of the von Willebrand factor (VWF) propeptide to identify patients with type 1 von Willebrand disease with decreased VWF survival. *Blood*. 2006;108(10):3344.
5. Stufano F, Boscarino M, Bucciarelli P, et al. Evaluation of the Utility of von Willebrand Factor Propeptide in the Differential Diagnosis of von Willebrand Disease and Acquired von Willebrand Syndrome. *Seminars in Thrombosis and Hemostasis*. 2019;45(1):36-42.
6. Nichols WL, Hultin MB, James AH, Manco-Johnson MJ, Montgomery RR, Ortel TL, Rick ME, Sadler JE, Weinstein M, Yawn BP. von Willebrand disease (VWD): evidence-based diagnosis and management guidelines, the National Heart, Lung, and Blood Institute (NHLBI) Expert Panel report (USA). *Haemophilia* 2008; 14: 171–232.

## Question 7

| Should VWF:RCo/Ag <0.5 vs. VWF:RCo/Ag <0.7 be used to diagnose VWD type 2 in Patients suspected of VWD type 2? |                                                                                                                                                                                                                                                                                                                                                                                                                                                                                                                                                                                                                                                                                                                                                                                   |
|----------------------------------------------------------------------------------------------------------------|-----------------------------------------------------------------------------------------------------------------------------------------------------------------------------------------------------------------------------------------------------------------------------------------------------------------------------------------------------------------------------------------------------------------------------------------------------------------------------------------------------------------------------------------------------------------------------------------------------------------------------------------------------------------------------------------------------------------------------------------------------------------------------------|
| <b>POPULATION:</b>                                                                                             | Patients suspected of VWD type 2                                                                                                                                                                                                                                                                                                                                                                                                                                                                                                                                                                                                                                                                                                                                                  |
| <b>INTERVENTION:</b>                                                                                           | VWF:RCo/Ag <0.5                                                                                                                                                                                                                                                                                                                                                                                                                                                                                                                                                                                                                                                                                                                                                                   |
| <b>COMPARISON:</b>                                                                                             | VWF:RCo/Ag <0.7                                                                                                                                                                                                                                                                                                                                                                                                                                                                                                                                                                                                                                                                                                                                                                   |
| <b>PURPOSE OF THE TEST:</b>                                                                                    | Identify patients with VWD type 2                                                                                                                                                                                                                                                                                                                                                                                                                                                                                                                                                                                                                                                                                                                                                 |
| <b>ROLE OF THE TEST:</b>                                                                                       | Identify patients with VWD type 2                                                                                                                                                                                                                                                                                                                                                                                                                                                                                                                                                                                                                                                                                                                                                 |
| <b>LINKED TREATMENTS:</b>                                                                                      | Desmopressin, Tranexamic acid, Factor replacement                                                                                                                                                                                                                                                                                                                                                                                                                                                                                                                                                                                                                                                                                                                                 |
| <b>ANTICIPATED OUTCOMES:</b>                                                                                   | VWF:RCo/Ag <0.5 – False positive, VWF:RCo/Ag <0.5 – False negative, VWF:RCo/Ag <0.5 – True positive, VWF:RCo/Ag <0.5 – True negative<br>Major bleeding, transfusion and treatment, blood loss, gastrointestinal bleeding, symptom severity, minor bleeding, mortality.                                                                                                                                                                                                                                                                                                                                                                                                                                                                                                            |
| <b>SETTING:</b>                                                                                                | Outpatient setting                                                                                                                                                                                                                                                                                                                                                                                                                                                                                                                                                                                                                                                                                                                                                                |
| <b>PERSPECTIVE:</b>                                                                                            | Clinical recommendation – population perspective                                                                                                                                                                                                                                                                                                                                                                                                                                                                                                                                                                                                                                                                                                                                  |
| <b>BACKGROUND:</b>                                                                                             | Von Willebrand disease (VWD) is the most common inherited bleeding disorder known in humans: while estimated to affect between 0.1 and 1% of the general population, many are never diagnosed. VWD diagnosis and classification require numerous laboratory tests. (Pathare, 2018). Type 2 VWD accounts for 25% of cases and results from the expression of a functionally abnormal VWF molecule (Lavin 2017). Diagnosis and classification of VWD requires correlation between clinical findings and laboratory results. Recommended initial laboratory tests include measurements of plasma VWF antigen (VWF:Ag), VWF-platelet GP Ib binding activity (e.g. VWF:RCo) and FVIII:C (Chenn, 2011). The ratio of VWF:RCo/VWF:Ag is used to distinguish type 2 from other VWD types. |
| <b>SUBGROUPS:</b>                                                                                              |                                                                                                                                                                                                                                                                                                                                                                                                                                                                                                                                                                                                                                                                                                                                                                                   |
| <b>CONFLICT OF INTERESTS:</b>                                                                                  | ASH conflict of interest declaration and management policies were applied, and the following panel members were voting panel members (determining the direction and strength of the recommendation): Sandra Haberichter, Jeroen Eikenboom, Barbara Konkle, Robert Sidonio Jr, Simon McRae, Robert Montgomery, James O'Donnell, Claire McLintock, Barbara Ameer, Nicolas Giraud, Nikole Scappe, Vicki Jacobs-Pratt, Paula James, Nathan Connell.<br><br>No panel members recused as a result of risk of conflicts of interest.                                                                                                                                                                                                                                                     |

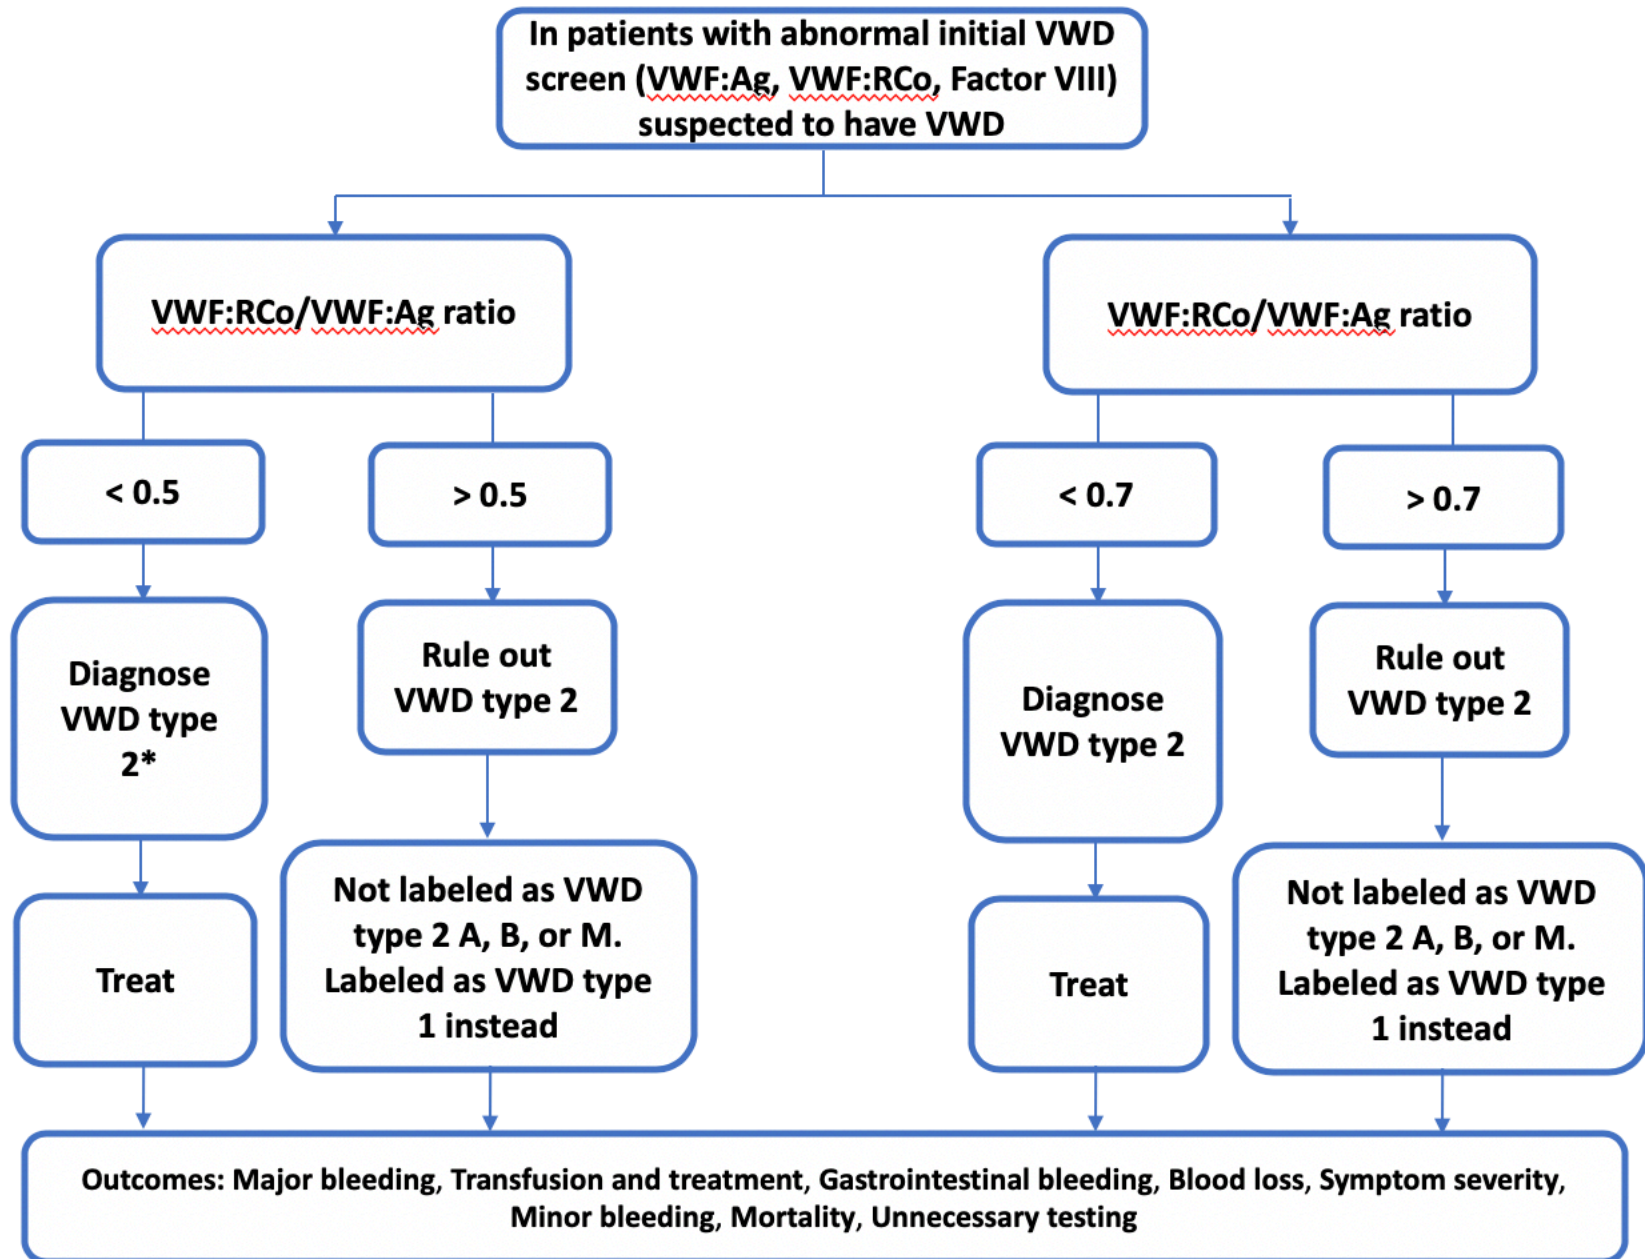

\* Polymorphism should be considered if the patient has an abnormal VWF:RCo

## ASSESSMENT

| Problem                                                                                                                                                                                                                                                                                                           |                                                                                                                                                                                                                                                                                                                                                                                                                                                                                                                                                                                                                                                                                                                                                                                                                                                                                                                                                                                                                                                                                                                                                                                                                                                       |                  |                              |                                                                                                                 |                                                     |  |                              |                                   |                |  |                 |                 |                                         |                  |                  |         |  |  |                                |  |  |  |  |  |
|-------------------------------------------------------------------------------------------------------------------------------------------------------------------------------------------------------------------------------------------------------------------------------------------------------------------|-------------------------------------------------------------------------------------------------------------------------------------------------------------------------------------------------------------------------------------------------------------------------------------------------------------------------------------------------------------------------------------------------------------------------------------------------------------------------------------------------------------------------------------------------------------------------------------------------------------------------------------------------------------------------------------------------------------------------------------------------------------------------------------------------------------------------------------------------------------------------------------------------------------------------------------------------------------------------------------------------------------------------------------------------------------------------------------------------------------------------------------------------------------------------------------------------------------------------------------------------------|------------------|------------------------------|-----------------------------------------------------------------------------------------------------------------|-----------------------------------------------------|--|------------------------------|-----------------------------------|----------------|--|-----------------|-----------------|-----------------------------------------|------------------|------------------|---------|--|--|--------------------------------|--|--|--|--|--|
| Is the problem a priority?                                                                                                                                                                                                                                                                                        |                                                                                                                                                                                                                                                                                                                                                                                                                                                                                                                                                                                                                                                                                                                                                                                                                                                                                                                                                                                                                                                                                                                                                                                                                                                       |                  |                              |                                                                                                                 |                                                     |  |                              |                                   |                |  |                 |                 |                                         |                  |                  |         |  |  |                                |  |  |  |  |  |
| JUDGEMENT                                                                                                                                                                                                                                                                                                         | RESEARCH EVIDENCE                                                                                                                                                                                                                                                                                                                                                                                                                                                                                                                                                                                                                                                                                                                                                                                                                                                                                                                                                                                                                                                                                                                                                                                                                                     |                  |                              | ADDITIONAL CONSIDERATIONS                                                                                       |                                                     |  |                              |                                   |                |  |                 |                 |                                         |                  |                  |         |  |  |                                |  |  |  |  |  |
| <ul style="list-style-type: none"> <li><input type="radio"/> No</li> <li><input type="radio"/> Probably no</li> <li><input type="radio"/> Probably yes</li> <li><input checked="" type="radio"/> Yes</li> <li><input type="radio"/> Varies</li> <li><input type="radio"/> Don't know</li> </ul>                   | <p>Von Willebrand disease (VWD) is the most common inherited bleeding disorder known in humans: while estimated to affect between 0.1 and 1% of the general population, many are never diagnosed. VWD diagnosis and classification require numerous laboratory tests. (Pathare, 2018). Type 2 VWD accounts for 25% of cases and results from the expression of a functionally abnormal VWF molecule (Lavin 2017). Diagnosis and classification of VWD require a correlation between clinical findings and laboratory results. Recommended initial laboratory tests include measurements of plasma VWF antigen (VWF:Ag), VWF-platelet GP Ib binding activity (e.g. VWF:RCo) and FVIII:C (Chenn, 2011). The ratio of VWF:RCo/VWF:Ag is used to distinguish type 2 from other VWD types. While a clear-cut diagnosis is easy in severe von Willebrand factor reductions, the advantage of pursuing a definite diagnosis in mild or dubious cases should be weighed against the risk of over-medicalization. Identifying patients with VWD type 2 will help to give a treatment that will correct the dual defect of hemostasis caused by the abnormal/reduced von Willebrand factor and the concomitant deficiency of factor VIII. (Castaman, 2013).</p> |                  |                              | <p>This question was judged to be a priority among many candidate questions to address in these guidelines.</p> |                                                     |  |                              |                                   |                |  |                 |                 |                                         |                  |                  |         |  |  |                                |  |  |  |  |  |
| Test accuracy                                                                                                                                                                                                                                                                                                     |                                                                                                                                                                                                                                                                                                                                                                                                                                                                                                                                                                                                                                                                                                                                                                                                                                                                                                                                                                                                                                                                                                                                                                                                                                                       |                  |                              |                                                                                                                 |                                                     |  |                              |                                   |                |  |                 |                 |                                         |                  |                  |         |  |  |                                |  |  |  |  |  |
| How accurate is the test?                                                                                                                                                                                                                                                                                         |                                                                                                                                                                                                                                                                                                                                                                                                                                                                                                                                                                                                                                                                                                                                                                                                                                                                                                                                                                                                                                                                                                                                                                                                                                                       |                  |                              |                                                                                                                 |                                                     |  |                              |                                   |                |  |                 |                 |                                         |                  |                  |         |  |  |                                |  |  |  |  |  |
| JUDGEMENT                                                                                                                                                                                                                                                                                                         | RESEARCH EVIDENCE                                                                                                                                                                                                                                                                                                                                                                                                                                                                                                                                                                                                                                                                                                                                                                                                                                                                                                                                                                                                                                                                                                                                                                                                                                     |                  |                              | ADDITIONAL CONSIDERATIONS                                                                                       |                                                     |  |                              |                                   |                |  |                 |                 |                                         |                  |                  |         |  |  |                                |  |  |  |  |  |
| <ul style="list-style-type: none"> <li><input type="radio"/> Very inaccurate</li> <li><input checked="" type="radio"/> Inaccurate</li> <li><input type="radio"/> Accurate</li> <li><input type="radio"/> Very accurate</li> <li><input type="radio"/> Varies</li> <li><input type="radio"/> Don't know</li> </ul> | <p>At &lt;0.5, sensitivity was between 0.58 to 0.79 in 3 studies with 95 patients, and specificity was assumed to be 1.</p> <p>At &lt;0.6, sensitivity was between 0.68 to 0.97 in 3 studies with 97 patients and specificity was 0.87 in 1 study with 97 patients.</p> <p>At &lt;0.7, pooled sensitivity was 0.90 (95% CI: 0.83 to 0.94) in 5 studies with 204 patients and specificity was 0.91 (95% CI: 0.76 to 0.97) in 4 studies with 994 patients.</p> <table border="1" style="width: 100%; border-collapse: collapse; text-align: center;"> <thead> <tr> <th rowspan="3">Test result</th> <th colspan="2">Number of results per 1000 patients tested (95% CI)</th> <th rowspan="3">No of participants (studies)</th> <th rowspan="3">Certainty of the evidence (GRADE)</th> </tr> <tr> <th colspan="2">Prevalence 30%</th> </tr> <tr> <th>VWF:RCo/Ag &lt;0.5</th> <th>VWF:RCo/Ag &lt;0.7</th> </tr> </thead> <tbody> <tr> <td>True positives patients with VWD type 2</td> <td>205 (161 to 249)</td> <td>270 (249 to 282)</td> <td>299 (6)</td> <td></td> </tr> <tr> <td></td> <td colspan="2">65 fewer TP in VWF:RCo/Ag &lt;0.5</td> <td></td> <td></td> </tr> </tbody> </table>                                                             |                  |                              | Test result                                                                                                     | Number of results per 1000 patients tested (95% CI) |  | No of participants (studies) | Certainty of the evidence (GRADE) | Prevalence 30% |  | VWF:RCo/Ag <0.5 | VWF:RCo/Ag <0.7 | True positives patients with VWD type 2 | 205 (161 to 249) | 270 (249 to 282) | 299 (6) |  |  | 65 fewer TP in VWF:RCo/Ag <0.5 |  |  |  |  |  |
| Test result                                                                                                                                                                                                                                                                                                       | Number of results per 1000 patients tested (95% CI)                                                                                                                                                                                                                                                                                                                                                                                                                                                                                                                                                                                                                                                                                                                                                                                                                                                                                                                                                                                                                                                                                                                                                                                                   |                  | No of participants (studies) |                                                                                                                 | Certainty of the evidence (GRADE)                   |  |                              |                                   |                |  |                 |                 |                                         |                  |                  |         |  |  |                                |  |  |  |  |  |
|                                                                                                                                                                                                                                                                                                                   | Prevalence 30%                                                                                                                                                                                                                                                                                                                                                                                                                                                                                                                                                                                                                                                                                                                                                                                                                                                                                                                                                                                                                                                                                                                                                                                                                                        |                  |                              |                                                                                                                 |                                                     |  |                              |                                   |                |  |                 |                 |                                         |                  |                  |         |  |  |                                |  |  |  |  |  |
|                                                                                                                                                                                                                                                                                                                   | VWF:RCo/Ag <0.5                                                                                                                                                                                                                                                                                                                                                                                                                                                                                                                                                                                                                                                                                                                                                                                                                                                                                                                                                                                                                                                                                                                                                                                                                                       | VWF:RCo/Ag <0.7  |                              |                                                                                                                 |                                                     |  |                              |                                   |                |  |                 |                 |                                         |                  |                  |         |  |  |                                |  |  |  |  |  |
| True positives patients with VWD type 2                                                                                                                                                                                                                                                                           | 205 (161 to 249)                                                                                                                                                                                                                                                                                                                                                                                                                                                                                                                                                                                                                                                                                                                                                                                                                                                                                                                                                                                                                                                                                                                                                                                                                                      | 270 (249 to 282) | 299 (6)                      |                                                                                                                 |                                                     |  |                              |                                   |                |  |                 |                 |                                         |                  |                  |         |  |  |                                |  |  |  |  |  |
|                                                                                                                                                                                                                                                                                                                   | 65 fewer TP in VWF:RCo/Ag <0.5                                                                                                                                                                                                                                                                                                                                                                                                                                                                                                                                                                                                                                                                                                                                                                                                                                                                                                                                                                                                                                                                                                                                                                                                                        |                  |                              |                                                                                                                 |                                                     |  |                              |                                   |                |  |                 |                 |                                         |                  |                  |         |  |  |                                |  |  |  |  |  |

|                                                                                                                                                                                                                                                                                                                                  |                                     |                  |         |                                   |
|----------------------------------------------------------------------------------------------------------------------------------------------------------------------------------------------------------------------------------------------------------------------------------------------------------------------------------|-------------------------------------|------------------|---------|-----------------------------------|
| False negatives patients incorrectly classified as not having VWD type 2                                                                                                                                                                                                                                                         | 95 (51 to 139)                      | 30 (18 to 51)    | 994 (4) | ⊕○○○<br>VERY LOW <sup>a,b,c</sup> |
|                                                                                                                                                                                                                                                                                                                                  | 65 more FN in VWF:RCo/Ag <0.5 IU/dL |                  |         |                                   |
|                                                                                                                                                                                                                                                                                                                                  |                                     |                  |         |                                   |
| True negatives patients without VWD type 2                                                                                                                                                                                                                                                                                       | 700 (693 to 700)                    | 637 (532 to 679) | 994 (4) | ⊕○○○<br>VERY LOW <sup>a,c,d</sup> |
|                                                                                                                                                                                                                                                                                                                                  | 63 more TN in VWF:RCo/Ag <0.5 IU/dL |                  |         |                                   |
|                                                                                                                                                                                                                                                                                                                                  |                                     |                  |         |                                   |
| False positives patients incorrectly classified as having VWD type 2                                                                                                                                                                                                                                                             | 0 (0 to 7)                          | 63 (21 to 168)   | 994 (4) | ⊕○○○<br>VERY LOW <sup>a,c,d</sup> |
|                                                                                                                                                                                                                                                                                                                                  | 63 fewer FP in VWF:RCo/Ag <0.5      |                  |         |                                   |
|                                                                                                                                                                                                                                                                                                                                  |                                     |                  |         |                                   |
| <p>a. Case control design lead to serious patient selection bias</p> <p>b. The studies are not comparative</p> <p>c. There is high unexplained heterogeneity</p> <p>d. The studies are not comparative and the specificity was assumed to be 100% at the 0.5 cut-off</p> <p>Refer to the Appendix at the end of the document</p> |                                     |                  |         |                                   |

### Desirable Effects

How substantial are the desirable anticipated effects?

| JUDGEMENT                                                                                                                                                 | RESEARCH EVIDENCE                                                                                                                                                                                                                                                                                                                                                                                                                                                                                                                                                                                                                                                                                                                                                                                                                                                                                                                                                                                                                                                                                                                                                                                                                                                                                                                                          | ADDITIONAL CONSIDERATIONS                                                                                                                                                                                                                                          |
|-----------------------------------------------------------------------------------------------------------------------------------------------------------|------------------------------------------------------------------------------------------------------------------------------------------------------------------------------------------------------------------------------------------------------------------------------------------------------------------------------------------------------------------------------------------------------------------------------------------------------------------------------------------------------------------------------------------------------------------------------------------------------------------------------------------------------------------------------------------------------------------------------------------------------------------------------------------------------------------------------------------------------------------------------------------------------------------------------------------------------------------------------------------------------------------------------------------------------------------------------------------------------------------------------------------------------------------------------------------------------------------------------------------------------------------------------------------------------------------------------------------------------------|--------------------------------------------------------------------------------------------------------------------------------------------------------------------------------------------------------------------------------------------------------------------|
| <ul style="list-style-type: none"> <li>● Trivial</li> <li>○ Small</li> <li>○ Moderate</li> <li>○ Large</li> <li>○ Varies</li> <li>○ Don't know</li> </ul> | <p><b>True Positive:</b> These are patients who have VWD type 2 A, B, or M and who received preventive and appropriate treatment. They benefit from decreasing the risk of bleeding with treatment and they suffer the side effects of treatment.</p> <p><b>True Negative:</b> These are patients who did not have VWD type 2 A, B, or M and who were correctly identified as not having the disease. They will appropriately not receive treatment for VWD type 2 A, B, or M and not suffer the side effects of treatment, but may benefit from treatment for VWD type 1 or 2N.</p> <p><b>False Negative:</b> These are patients who have VWD type 2 A, B, or M but the diagnosis was missed and will be sent home without appropriate treatment. They face the risks of prolonged and heavy bleeding due to not receiving treatment. They will be labeled as VWD type 1 or 2N, and may receive inappropriate treatment (Desmopressin) and may be incorrectly counseled about the risk in their children.</p> <p><b>False Positive:</b> These are patients who did not have VWD type 2 A, B, or M but they will be labeled as having VWD type 2 A, B, or M and receive unnecessary treatment. These patients actually have VWD type 1 or 2N. They may benefit from the treatment if they have other bleeding disorders, but they suffer side effects.</p> | <p>There is not much harm to have high false positives as there is a tendency to use genetic testing in the few coming years when the testing becomes cheaper. False negatives are considered more relevant to this question by patients and clinical experts.</p> |

### Undesirable Effects

How substantial are the undesirable anticipated effects?

| JUDGEMENT                                                                                                                                                 | RESEARCH EVIDENCE                                                                                                                                                                                                                                                                                                                                                                                                                                                                                                                                                                                                                                                                                                                                                                                                                                                                                                                                                                                                                                                                                                                                                                                                                                                                                                                                          | ADDITIONAL CONSIDERATIONS                                                                                         |
|-----------------------------------------------------------------------------------------------------------------------------------------------------------|------------------------------------------------------------------------------------------------------------------------------------------------------------------------------------------------------------------------------------------------------------------------------------------------------------------------------------------------------------------------------------------------------------------------------------------------------------------------------------------------------------------------------------------------------------------------------------------------------------------------------------------------------------------------------------------------------------------------------------------------------------------------------------------------------------------------------------------------------------------------------------------------------------------------------------------------------------------------------------------------------------------------------------------------------------------------------------------------------------------------------------------------------------------------------------------------------------------------------------------------------------------------------------------------------------------------------------------------------------|-------------------------------------------------------------------------------------------------------------------|
| <ul style="list-style-type: none"> <li>○ Large</li> <li>● Moderate</li> <li>○ Small</li> <li>○ Trivial</li> <li>○ Varies</li> <li>○ Don't know</li> </ul> | <p><b>True Positive:</b> These are patients who have VWD type 2 A, B, or M and who received preventive and appropriate treatment. They benefit from decreasing the risk of bleeding with treatment and they suffer the side effects of treatment.</p> <p><b>True Negative:</b> These are patients who did not have VWD type 2 A, B, or M and who were correctly identified as not having the disease. They will appropriately not receive treatment for VWD type 2 A, B, or M and not suffer the side effects of treatment, but may benefit from treatment for VWD type 1 or 2N.</p> <p><b>False Negative:</b> These are patients who have VWD type 2 A, B, or M but the diagnosis was missed and will be sent home without appropriate treatment. They face the risks of prolonged and heavy bleeding due to not receiving treatment. They will be labeled as VWD type 1 or 2N, and may receive inappropriate treatment (Desmopressin) and may be incorrectly counseled about the risk in their children.</p> <p><b>False Positive:</b> These are patients who did not have VWD type 2 A, B, or M but they will be labeled as having VWD type 2 A, B, or M and receive unnecessary treatment. These patients actually have VWD type 1 or 2N. They may benefit from the treatment if they have other bleeding disorders, but they suffer side effects.</p> | <p>Higher false negative when using the 0.5 diagnostic threshold.</p> <p>Potentially inappropriate treatment.</p> |

#### Certainty of the evidence of test accuracy

What is the overall certainty of the evidence of test accuracy?

| JUDGEMENT                                                                                                                                      | RESEARCH EVIDENCE                                                                                                                                                                                                                                                                                                    | ADDITIONAL CONSIDERATIONS |
|------------------------------------------------------------------------------------------------------------------------------------------------|----------------------------------------------------------------------------------------------------------------------------------------------------------------------------------------------------------------------------------------------------------------------------------------------------------------------|---------------------------|
| <ul style="list-style-type: none"> <li>● Very low</li> <li>○ Low</li> <li>○ Moderate</li> <li>○ High</li> <li>○ No included studies</li> </ul> | <p>The certainty of the evidence for test accuracy is very low and that is due to case-control design leading to serious population selection bias. Also, issues around labeling as type 2M were noted. The studies do not compare the 2 tests cut-offs directly and there is serious unexplained heterogeneity.</p> |                           |

#### Certainty of the evidence of test's effects

What is the overall certainty of the evidence for any critical or important direct benefits, adverse effects or burden of the test?

| JUDGEMENT                                                                                                       | RESEARCH EVIDENCE                                                                                                                                          | ADDITIONAL CONSIDERATIONS |
|-----------------------------------------------------------------------------------------------------------------|------------------------------------------------------------------------------------------------------------------------------------------------------------|---------------------------|
| <ul style="list-style-type: none"> <li>○ Very low</li> <li>○ Low</li> <li>○ Moderate</li> <li>○ High</li> </ul> | <p>Test's effects are not applicable since the intervention consists of a blood test that has no important direct benefits, adverse effects or burden.</p> |                           |

| <ul style="list-style-type: none"> <li>● No included studies</li> </ul>                                                                                                    |                                                         |                                                                                                                                                                                                                                                                                                                                        |
|----------------------------------------------------------------------------------------------------------------------------------------------------------------------------|---------------------------------------------------------|----------------------------------------------------------------------------------------------------------------------------------------------------------------------------------------------------------------------------------------------------------------------------------------------------------------------------------------|
| <b>Certainty of the evidence of management's effects</b><br>What is the overall certainty of the evidence of effects of the management that is guided by the test results? |                                                         |                                                                                                                                                                                                                                                                                                                                        |
| <b>JUDGEMENT</b>                                                                                                                                                           | <b>RESEARCH EVIDENCE</b>                                | <b>ADDITIONAL CONSIDERATIONS</b>                                                                                                                                                                                                                                                                                                       |
| <ul style="list-style-type: none"> <li>○ Very low</li> <li>○ Low</li> <li>○ Moderate</li> <li>○ High</li> <li>● No included studies</li> </ul>                             |                                                         |                                                                                                                                                                                                                                                                                                                                        |
| <b>Certainty of the evidence of test result/management</b><br>How certain is the link between test results and management decisions?                                       |                                                         |                                                                                                                                                                                                                                                                                                                                        |
| <b>JUDGEMENT</b>                                                                                                                                                           | <b>RESEARCH EVIDENCE</b>                                | <b>ADDITIONAL CONSIDERATIONS</b>                                                                                                                                                                                                                                                                                                       |
| <ul style="list-style-type: none"> <li>○ Very low</li> <li>○ Low</li> <li>○ Moderate</li> <li>○ High</li> <li>● No included studies</li> </ul>                             |                                                         | <p>The cut off between types 1 and 2 is for classification only. It is not a crucial issue when deciding on treatment. Desmopressin is more likely not to work for type 2 A and 2 M, and is relatively contraindicated for type 2 B. However, if the choice of treatment is not desmopressin, the labeling will not have an effect</p> |
| <b>Certainty of effects</b><br>What is the overall certainty of the evidence of effects of the test?                                                                       |                                                         |                                                                                                                                                                                                                                                                                                                                        |
| <b>JUDGEMENT</b>                                                                                                                                                           | <b>RESEARCH EVIDENCE</b>                                | <b>ADDITIONAL CONSIDERATIONS</b>                                                                                                                                                                                                                                                                                                       |
| <ul style="list-style-type: none"> <li>● Very low</li> <li>○ Low</li> <li>○ Moderate</li> <li>○ High</li> <li>○ No included</li> </ul>                                     | <p>Refer to the Appendix at the end of the document</p> |                                                                                                                                                                                                                                                                                                                                        |



|                                                                                                                                                                                                                                                                  |                                                                                                                                                                                                                                                                                                                                                                                                                                                                                                                                                                                                                                             |                                                                                                                                                                                                                                                                                                                                                                                                                                                                                                                                                                                                                                                                                                                                                                                                                                                                                                                                                                                                  |
|------------------------------------------------------------------------------------------------------------------------------------------------------------------------------------------------------------------------------------------------------------------|---------------------------------------------------------------------------------------------------------------------------------------------------------------------------------------------------------------------------------------------------------------------------------------------------------------------------------------------------------------------------------------------------------------------------------------------------------------------------------------------------------------------------------------------------------------------------------------------------------------------------------------------|--------------------------------------------------------------------------------------------------------------------------------------------------------------------------------------------------------------------------------------------------------------------------------------------------------------------------------------------------------------------------------------------------------------------------------------------------------------------------------------------------------------------------------------------------------------------------------------------------------------------------------------------------------------------------------------------------------------------------------------------------------------------------------------------------------------------------------------------------------------------------------------------------------------------------------------------------------------------------------------------------|
| studies                                                                                                                                                                                                                                                          |                                                                                                                                                                                                                                                                                                                                                                                                                                                                                                                                                                                                                                             |                                                                                                                                                                                                                                                                                                                                                                                                                                                                                                                                                                                                                                                                                                                                                                                                                                                                                                                                                                                                  |
| <b>Values</b><br>Is there important uncertainty about or variability in how much people value the main outcomes?                                                                                                                                                 |                                                                                                                                                                                                                                                                                                                                                                                                                                                                                                                                                                                                                                             |                                                                                                                                                                                                                                                                                                                                                                                                                                                                                                                                                                                                                                                                                                                                                                                                                                                                                                                                                                                                  |
| <b>JUDGEMENT</b>                                                                                                                                                                                                                                                 | <b>RESEARCH EVIDENCE</b>                                                                                                                                                                                                                                                                                                                                                                                                                                                                                                                                                                                                                    | <b>ADDITIONAL CONSIDERATIONS</b>                                                                                                                                                                                                                                                                                                                                                                                                                                                                                                                                                                                                                                                                                                                                                                                                                                                                                                                                                                 |
| <ul style="list-style-type: none"> <li>○ Important uncertainty or variability</li> <li>○ Possibly important uncertainty or variability</li> <li>● Probably no important uncertainty or variability</li> <li>○ No important uncertainty or variability</li> </ul> | <p>Patients are very familiar with having blood drawn for lab testing for any reason. Well-trained phlebotomists at blood disorder treatment centers are efficient and have a good technique which means little or no bruising from blood draws for specialized hematology laboratory tests (Aschman, 2014). Actually, patients care to have assays that can be trusted and don't have to be repeated on multiple occasions. So, patient concerns or preferences that are specific to these specialized labs are not different than other blood testing techniques, but concerns arise regarding the cut-off value used. (Baker, 2019).</p> | <p>Patients are interested in the results of the antigen and activity assays but frequently have no understanding of the tests and cut-offs, they desire an accurate diagnosis that will lead to proper treatment. Patients value clear and consistent guidelines on the reasons for different test choices and the cut-off used, as patients are frustrated when they are not able to determine if they certainly have or do not have VWD. In addition to getting the diagnosis right, patients place value in getting the diagnosis in a timely matter.</p> <p>The quality of life and counseling are the concern for patients when they are mislabeled. Some pregnant women were refused epidural anesthesia because they are labeled as type 2, but that would not be a problem if they are labeled as type 1. For patients, it is very important to understand the difference in treatment between the different types of VWD. Patients guidelines with educational material is needed.</p> |
| <b>Balance of effects</b><br>Does the balance between desirable and undesirable effects favor the intervention or the comparison?                                                                                                                                |                                                                                                                                                                                                                                                                                                                                                                                                                                                                                                                                                                                                                                             |                                                                                                                                                                                                                                                                                                                                                                                                                                                                                                                                                                                                                                                                                                                                                                                                                                                                                                                                                                                                  |
| <b>JUDGEMENT</b>                                                                                                                                                                                                                                                 | <b>RESEARCH EVIDENCE</b>                                                                                                                                                                                                                                                                                                                                                                                                                                                                                                                                                                                                                    | <b>ADDITIONAL CONSIDERATIONS</b>                                                                                                                                                                                                                                                                                                                                                                                                                                                                                                                                                                                                                                                                                                                                                                                                                                                                                                                                                                 |

|                                                                                                                                                                                                                                                                                                                |                                                         |  |
|----------------------------------------------------------------------------------------------------------------------------------------------------------------------------------------------------------------------------------------------------------------------------------------------------------------|---------------------------------------------------------|--|
| <ul style="list-style-type: none"> <li>● Favors the comparison</li> <li>○ Probably favors the comparison</li> <li>○ Does not favor either the intervention or the comparison</li> <li>○ Probably favors the intervention</li> <li>○ Favors the intervention</li> <li>○ Varies</li> <li>○ Don't know</li> </ul> | <p>Refer to the Appendix at the end of the document</p> |  |
|----------------------------------------------------------------------------------------------------------------------------------------------------------------------------------------------------------------------------------------------------------------------------------------------------------------|---------------------------------------------------------|--|

**Resources required**  
How large are the resource requirements (costs)?

| JUDGEMENT                                                                                                                                                                                                                                                                                                                                                                   | RESEARCH EVIDENCE                                                                                                                                                                                                                                                                                                                                                                                                                                                                                                                                                                                                                                                                                                                                                      |        |         |           |           | ADDITIONAL CONSIDERATIONS |  |        |         |           |           |            |    |       |       |    |  |               |    |       |       |  |       |                  |    |        |     |         |  |                    |    |    |    |    |  |               |   |       |    |  |    |           |   |      |    |  |  |                                                           |
|-----------------------------------------------------------------------------------------------------------------------------------------------------------------------------------------------------------------------------------------------------------------------------------------------------------------------------------------------------------------------------|------------------------------------------------------------------------------------------------------------------------------------------------------------------------------------------------------------------------------------------------------------------------------------------------------------------------------------------------------------------------------------------------------------------------------------------------------------------------------------------------------------------------------------------------------------------------------------------------------------------------------------------------------------------------------------------------------------------------------------------------------------------------|--------|---------|-----------|-----------|---------------------------|--|--------|---------|-----------|-----------|------------|----|-------|-------|----|--|---------------|----|-------|-------|--|-------|------------------|----|--------|-----|---------|--|--------------------|----|----|----|----|--|---------------|---|-------|----|--|----|-----------|---|------|----|--|--|-----------------------------------------------------------|
| <ul style="list-style-type: none"> <li>○ Large costs</li> <li>○ Moderate costs</li> <li>● Negligible costs and savings</li> <li>○ Moderate savings</li> <li>○ Large savings</li> <li>○ Varies</li> <li>○ Don't know</li> </ul>                                                                                                                                              | <table border="1"> <thead> <tr> <th></th> <th></th> <th>VWF:Ag</th> <th>VWF:RCo</th> <th>VWF:Gp1bR</th> <th>VWF:Gp1bM</th> </tr> </thead> <tbody> <tr> <td><b>USA</b></td> <td>\$</td> <td>25-30</td> <td>25-30</td> <td>80</td> <td></td> </tr> <tr> <td><b>Canada</b></td> <td>\$</td> <td>25-30</td> <td>25-30</td> <td></td> <td>25-30</td> </tr> <tr> <td><b>Australia</b></td> <td>\$</td> <td>80-120</td> <td>250</td> <td>160-220</td> <td></td> </tr> <tr> <td><b>New Zealand</b></td> <td>\$</td> <td>12</td> <td>20</td> <td>15</td> <td></td> </tr> <tr> <td><b>Europe</b></td> <td>€</td> <td>25-30</td> <td>25</td> <td></td> <td>25</td> </tr> <tr> <td><b>UK</b></td> <td>£</td> <td>8-20</td> <td>30</td> <td></td> <td></td> </tr> </tbody> </table> |        |         |           |           |                           |  | VWF:Ag | VWF:RCo | VWF:Gp1bR | VWF:Gp1bM | <b>USA</b> | \$ | 25-30 | 25-30 | 80 |  | <b>Canada</b> | \$ | 25-30 | 25-30 |  | 25-30 | <b>Australia</b> | \$ | 80-120 | 250 | 160-220 |  | <b>New Zealand</b> | \$ | 12 | 20 | 15 |  | <b>Europe</b> | € | 25-30 | 25 |  | 25 | <b>UK</b> | £ | 8-20 | 30 |  |  | <p>There is no effect on changing the ratio on costs.</p> |
|                                                                                                                                                                                                                                                                                                                                                                             |                                                                                                                                                                                                                                                                                                                                                                                                                                                                                                                                                                                                                                                                                                                                                                        | VWF:Ag | VWF:RCo | VWF:Gp1bR | VWF:Gp1bM |                           |  |        |         |           |           |            |    |       |       |    |  |               |    |       |       |  |       |                  |    |        |     |         |  |                    |    |    |    |    |  |               |   |       |    |  |    |           |   |      |    |  |  |                                                           |
| <b>USA</b>                                                                                                                                                                                                                                                                                                                                                                  | \$                                                                                                                                                                                                                                                                                                                                                                                                                                                                                                                                                                                                                                                                                                                                                                     | 25-30  | 25-30   | 80        |           |                           |  |        |         |           |           |            |    |       |       |    |  |               |    |       |       |  |       |                  |    |        |     |         |  |                    |    |    |    |    |  |               |   |       |    |  |    |           |   |      |    |  |  |                                                           |
| <b>Canada</b>                                                                                                                                                                                                                                                                                                                                                               | \$                                                                                                                                                                                                                                                                                                                                                                                                                                                                                                                                                                                                                                                                                                                                                                     | 25-30  | 25-30   |           | 25-30     |                           |  |        |         |           |           |            |    |       |       |    |  |               |    |       |       |  |       |                  |    |        |     |         |  |                    |    |    |    |    |  |               |   |       |    |  |    |           |   |      |    |  |  |                                                           |
| <b>Australia</b>                                                                                                                                                                                                                                                                                                                                                            | \$                                                                                                                                                                                                                                                                                                                                                                                                                                                                                                                                                                                                                                                                                                                                                                     | 80-120 | 250     | 160-220   |           |                           |  |        |         |           |           |            |    |       |       |    |  |               |    |       |       |  |       |                  |    |        |     |         |  |                    |    |    |    |    |  |               |   |       |    |  |    |           |   |      |    |  |  |                                                           |
| <b>New Zealand</b>                                                                                                                                                                                                                                                                                                                                                          | \$                                                                                                                                                                                                                                                                                                                                                                                                                                                                                                                                                                                                                                                                                                                                                                     | 12     | 20      | 15        |           |                           |  |        |         |           |           |            |    |       |       |    |  |               |    |       |       |  |       |                  |    |        |     |         |  |                    |    |    |    |    |  |               |   |       |    |  |    |           |   |      |    |  |  |                                                           |
| <b>Europe</b>                                                                                                                                                                                                                                                                                                                                                               | €                                                                                                                                                                                                                                                                                                                                                                                                                                                                                                                                                                                                                                                                                                                                                                      | 25-30  | 25      |           | 25        |                           |  |        |         |           |           |            |    |       |       |    |  |               |    |       |       |  |       |                  |    |        |     |         |  |                    |    |    |    |    |  |               |   |       |    |  |    |           |   |      |    |  |  |                                                           |
| <b>UK</b>                                                                                                                                                                                                                                                                                                                                                                   | £                                                                                                                                                                                                                                                                                                                                                                                                                                                                                                                                                                                                                                                                                                                                                                      | 8-20   | 30      |           |           |                           |  |        |         |           |           |            |    |       |       |    |  |               |    |       |       |  |       |                  |    |        |     |         |  |                    |    |    |    |    |  |               |   |       |    |  |    |           |   |      |    |  |  |                                                           |
| <p>There is considerable variability in cost among different jurisdictions. Cost is also affected by different factors including insurance plans. The estimate provided are based on the clinical experts best estimates. The data for required resources for some of the assays are not available because of lack of availability of the assay in different countries.</p> |                                                                                                                                                                                                                                                                                                                                                                                                                                                                                                                                                                                                                                                                                                                                                                        |        |         |           |           |                           |  |        |         |           |           |            |    |       |       |    |  |               |    |       |       |  |       |                  |    |        |     |         |  |                    |    |    |    |    |  |               |   |       |    |  |    |           |   |      |    |  |  |                                                           |

|  |  |  |
|--|--|--|
|  |  |  |
|--|--|--|

### Certainty of evidence of required resources

What is the certainty of the evidence of resource requirements (costs)?

| JUDGEMENT                                                                                                                                      | RESEARCH EVIDENCE | ADDITIONAL CONSIDERATIONS                                                                                                                                                                                                                                                                                                                                                                                                                            |
|------------------------------------------------------------------------------------------------------------------------------------------------|-------------------|------------------------------------------------------------------------------------------------------------------------------------------------------------------------------------------------------------------------------------------------------------------------------------------------------------------------------------------------------------------------------------------------------------------------------------------------------|
| <ul style="list-style-type: none"> <li>○ Very low</li> <li>○ Low</li> <li>○ Moderate</li> <li>○ High</li> <li>● No included studies</li> </ul> |                   | <p>The cost and difficulty of good quality control of these tests make these tests less accessible. There is difficulty in running multiple assays due to cost considerations, and reimbursement only available for a limited number of tests in an individual patient. Physicians should choose the assays that have basic requirements and then identify those that could be of use in settings where the resource is not so much of an issue.</p> |

### Cost effectiveness

Does the cost-effectiveness of the intervention favor the intervention or the comparison?

| JUDGEMENT                                                                                                                                                             | RESEARCH EVIDENCE                                                                                                                                                                                                                                                                                                                                                                                                                                                                                                                                                               | ADDITIONAL CONSIDERATIONS |
|-----------------------------------------------------------------------------------------------------------------------------------------------------------------------|---------------------------------------------------------------------------------------------------------------------------------------------------------------------------------------------------------------------------------------------------------------------------------------------------------------------------------------------------------------------------------------------------------------------------------------------------------------------------------------------------------------------------------------------------------------------------------|---------------------------|
| <ul style="list-style-type: none"> <li>○ Favors the comparison</li> <li>○ Probably favors the comparison</li> <li>○ Does not favor either the intervention</li> </ul> | <p>In a Markov decision analytic model taking a societal perspective and costs expressed in 2007 US dollars, the cost of testing adolescents with menorrhagia for VWD was \$1790, versus \$1251 for not testing for VWD. The effectiveness of not testing in quality-adjusted life-years (QALYs) gained (14.237 QALYs) was similar to the VWD testing strategy (14.246 QALYs). Compared with not testing for VWD, screening for VWD had an incremental cost-effectiveness ratio of \$62 791 per QALY, a value typically considered economically reasonable (Sidonio, 2010).</p> |                           |

|                                                                                                                                                                                                                      |  |  |
|----------------------------------------------------------------------------------------------------------------------------------------------------------------------------------------------------------------------|--|--|
| or the comparison<br><input type="radio"/> Probably favors the intervention<br><input type="radio"/> Favors the intervention<br><input type="radio"/> Varies<br><input checked="" type="radio"/> No included studies |  |  |
|----------------------------------------------------------------------------------------------------------------------------------------------------------------------------------------------------------------------|--|--|

**Equity**  
 What would be the impact on health equity?

| <b>JUDGEMENT</b>                                                                                                                                                                                                                                                                  | <b>RESEARCH EVIDENCE</b> | <b>ADDITIONAL CONSIDERATIONS</b>                                                                                                                                                                                                                                                                                                                                                                                                                                                                                                                                                                                                                                                                                                                                                                                                                                                                                                                            |
|-----------------------------------------------------------------------------------------------------------------------------------------------------------------------------------------------------------------------------------------------------------------------------------|--------------------------|-------------------------------------------------------------------------------------------------------------------------------------------------------------------------------------------------------------------------------------------------------------------------------------------------------------------------------------------------------------------------------------------------------------------------------------------------------------------------------------------------------------------------------------------------------------------------------------------------------------------------------------------------------------------------------------------------------------------------------------------------------------------------------------------------------------------------------------------------------------------------------------------------------------------------------------------------------------|
| <input type="radio"/> Reduced<br><input type="radio"/> Probably reduced<br><input checked="" type="radio"/> Probably no impact<br><input type="radio"/> Probably increased<br><input type="radio"/> Increased<br><input type="radio"/> Varies<br><input type="radio"/> Don't know |                          | <p>Not all tests are accessible to all patients. Therefore, a thorough and proper investigation may be limited due to the high cost and lack of exams with appropriate quality control.</p> <p>Insurance coverage for these tests is variable based on location and funding model. In fact, in the US most good private insurance cover antigen assay and activity assay, but some people have a large deductible. However, sometimes the value does not cover the overall cost of the test, especially in public services.</p> <p>In New Zealand specifically, all residents get blood tests for free. This is also applicable in the UK, since there is no practical restriction on requesting these tests. In Italy, they are partly covered by insurance. In Australia, a limited number of antigen and activity assays are covered by insurance - above 3 assays the cost is not covered. In the Netherlands, all assays are covered by insurance.</p> |

|  |  |                                                                                                                                                                                                                                                                                                                                                                                                                                                               |
|--|--|---------------------------------------------------------------------------------------------------------------------------------------------------------------------------------------------------------------------------------------------------------------------------------------------------------------------------------------------------------------------------------------------------------------------------------------------------------------|
|  |  | The VWF:RCo is potentially less useful for the African American population given the higher frequency of the D1472H variant in this group. Because of the higher rate of the benign variants that affect the VWF:RCo giving false positively low results the VWF:GPIIb testing is used in followup testing in Hispanic and African American groups more than Caucasian. The aforementioned populations are less likely to have easy access to larger centers. |
|--|--|---------------------------------------------------------------------------------------------------------------------------------------------------------------------------------------------------------------------------------------------------------------------------------------------------------------------------------------------------------------------------------------------------------------------------------------------------------------|

**Acceptability**  
Is the intervention acceptable to key stakeholders?

| JUDGEMENT                                                                                                                                                                                                       | RESEARCH EVIDENCE | ADDITIONAL CONSIDERATIONS                                  |
|-----------------------------------------------------------------------------------------------------------------------------------------------------------------------------------------------------------------|-------------------|------------------------------------------------------------|
| <input type="radio"/> No<br><input type="radio"/> Probably no<br><input type="radio"/> Probably yes<br><input checked="" type="radio"/> Yes<br><input type="radio"/> Varies<br><input type="radio"/> Don't know |                   | Generally, all patients accept the blood tests in question |

**Feasibility**  
Is the intervention feasible to implement?

| JUDGEMENT                                                                                                                                                                                                       | RESEARCH EVIDENCE | ADDITIONAL CONSIDERATIONS                                                                                                                                                                                                                                                                                                                                                                                                                   |
|-----------------------------------------------------------------------------------------------------------------------------------------------------------------------------------------------------------------|-------------------|---------------------------------------------------------------------------------------------------------------------------------------------------------------------------------------------------------------------------------------------------------------------------------------------------------------------------------------------------------------------------------------------------------------------------------------------|
| <input type="radio"/> No<br><input type="radio"/> Probably no<br><input type="radio"/> Probably yes<br><input checked="" type="radio"/> Yes<br><input type="radio"/> Varies<br><input type="radio"/> Don't know |                   | Antigen and activity assays have limited availability – available in most larger population centers will have centralized testing in specialist centers. It is usually not found in resource-poor countries and tertiary care centers even in high-income setting countries, specifically the activity assays. VWF:GPIIb or GPIbR is not available in most centers in the United States of America, but VWF:Ag and VWF:RCo are more readily |

available. VWF:Ag is only available in hospitals with special coagulation labs, and special coagulation labs usually only run either the VWF:RCo or one of the newer assays.

Countries differ in the challenges to access the testing (referrals within the system and logistic issues like traveling hundreds of kilometers), so testing is often sent out reference laboratories (with all the issues of pre-analytical variables, including sample collection and transport that can affect the reliability of results) outside of medium to large academic centers in the United States. Even when the tests are available in smaller non-academic centers, results may differ when compared to those from large referral centers.

Depending on where patients are allowed to undergo testing, there could be variation in results ( e.g., in California, insurers may not reimburse repeat testing of VWF:Ag and VWF:RCo or VWF:GPIIb/IIIa to be done at the respective academic center if performed already at private commercial laboratories). Often repeat testing is needed particularly if obtained at a time of stress (following a procedure) or in times of significant anemia. This issue is illustrated with teenage girls undergoing evaluation during an episode of heavy menstrual bleeding. Levels may be elevated over baseline and obscure the diagnosis of VWD or its subtype.

It may be possible to say that one or two activity measures are not accurate and reduce their use, but many labs are bound by managed service contracts and performing all

|  |  |                                                                                                                                                                                                                                                                                                                                                                                                                                                                               |
|--|--|-------------------------------------------------------------------------------------------------------------------------------------------------------------------------------------------------------------------------------------------------------------------------------------------------------------------------------------------------------------------------------------------------------------------------------------------------------------------------------|
|  |  | <p>labs as a single 'best' assay is often not feasible.</p> <p>Another feasibility issue assay availability and turnaround time in the perioperative setting. Some of the tests, such as the VWF:RCo, have a considerable coefficient of variation, which may influence laboratory research. In addition, the physiological or induced variations of VWF plasma levels also may affect the diagnosis of borderline cases, especially of type 1 VWD and low levels of VWF.</p> |
|--|--|-------------------------------------------------------------------------------------------------------------------------------------------------------------------------------------------------------------------------------------------------------------------------------------------------------------------------------------------------------------------------------------------------------------------------------------------------------------------------------|

### SUMMARY OF JUDGEMENTS

|                                                     | JUDGEMENT       |                   |              |               |  |        |                            |
|-----------------------------------------------------|-----------------|-------------------|--------------|---------------|--|--------|----------------------------|
| PROBLEM                                             | No              | Probably no       | Probably yes | Yes           |  | Varies | Don't know                 |
| TEST ACCURACY                                       | Very inaccurate | <b>Inaccurate</b> | Accurate     | Very accurate |  | Varies | Don't know                 |
| DESIRABLE EFFECTS                                   | <b>Trivial</b>  | Small             | Moderate     | Large         |  | Varies | Don't know                 |
| UNDESIRABLE EFFECTS                                 | Large           | <b>Moderate</b>   | Small        | Trivial       |  | Varies | Don't know                 |
| CERTAINTY OF THE EVIDENCE OF TEST ACCURACY          | <b>Very low</b> | Low               | Moderate     | High          |  |        | No included studies        |
| CERTAINTY OF THE EVIDENCE OF TEST'S EFFECTS         | Very low        | Low               | Moderate     | High          |  |        | <b>No included studies</b> |
| CERTAINTY OF THE EVIDENCE OF MANAGEMENT'S EFFECTS   | Very low        | Low               | Moderate     | High          |  |        | <b>No included studies</b> |
| CERTAINTY OF THE EVIDENCE OF TEST RESULT/MANAGEMENT | Very low        | Low               | Moderate     | High          |  |        | <b>No included studies</b> |

|                                                    |                                      |                                               |                                                          |                                         |                         |        |                            |
|----------------------------------------------------|--------------------------------------|-----------------------------------------------|----------------------------------------------------------|-----------------------------------------|-------------------------|--------|----------------------------|
| <b>CERTAINTY OF EFFECTS</b>                        | <b>Very low</b>                      | Low                                           | Moderate                                                 | High                                    |                         |        | No included studies        |
| <b>VALUES</b>                                      | Important uncertainty or variability | Possibly important uncertainty or variability | <b>Probably no important uncertainty or variability</b>  | No important uncertainty or variability |                         |        |                            |
| <b>BALANCE OF EFFECTS</b>                          | <b>Favors the comparison</b>         | Probably favors the comparison                | Does not favor either the intervention or the comparison | Probably favors the intervention        | Favors the intervention | Varies | Don't know                 |
| <b>RESOURCES REQUIRED</b>                          | Large costs                          | Moderate costs                                | <b>Negligible costs and savings</b>                      | Moderate savings                        | Large savings           | Varies | Don't know                 |
| <b>CERTAINTY OF EVIDENCE OF REQUIRED RESOURCES</b> | Very low                             | Low                                           | Moderate                                                 | High                                    |                         |        | <b>No included studies</b> |
| <b>COST EFFECTIVENESS</b>                          | Favors the comparison                | Probably favors the comparison                | Does not favor either the intervention or the comparison | Probably favors the intervention        | Favors the intervention | Varies | <b>No included studies</b> |
| <b>EQUITY</b>                                      | Reduced                              | Probably reduced                              | <b>Probably no impact</b>                                | Probably increased                      | Increased               | Varies | Don't know                 |
| <b>ACCEPTABILITY</b>                               | No                                   | Probably no                                   | Probably yes                                             | <b>Yes</b>                              |                         | Varies | Don't know                 |
| <b>FEASIBILITY</b>                                 | No                                   | Probably no                                   | Probably yes                                             | <b>Yes</b>                              |                         | Varies | Don't know                 |

#### TYPE OF RECOMMENDATION

|                                                     |                                                                 |                                                                               |                                                      |                                                 |
|-----------------------------------------------------|-----------------------------------------------------------------|-------------------------------------------------------------------------------|------------------------------------------------------|-------------------------------------------------|
| Strong recommendation against the intervention<br>○ | <b>Conditional recommendation against the intervention</b><br>● | Conditional recommendation for either the intervention or the comparison<br>○ | Conditional recommendation for the intervention<br>○ | Strong recommendation for the intervention<br>○ |
|-----------------------------------------------------|-----------------------------------------------------------------|-------------------------------------------------------------------------------|------------------------------------------------------|-------------------------------------------------|

#### CONCLUSIONS



## Recommendation

The panel suggests against a VWF activity/VWF:Ag (ratio of VWF activity to antigen)  $<0.5$  as a cut-off value, and rather using a higher cut-off value of  $<0.7$  to confirm the diagnosis of Type 2 VWD (2A, B, or M) in patients with an abnormal initial VWD screen (e.g. VWF:Ag and/or VWF activity), or a low VWF activity/VWF:Ag ratio.

(Conditional recommendation based on low certainty in the evidence)

## Justification

The guideline panel determined that there is low certainty in the evidence for a net health benefit from using a VWF:RCo/Ag cut-off of  $<0.7$  over a lower cut-off of  $<0.5$  in patients suspected of type 2 VWD. Other EtD criteria were generally in favor of using a cut-off of  $<0.7$  so that the desirable consequences were greater than the undesirable consequences.

## Subgroup considerations

## Implementation considerations

## Monitoring and evaluation

## Research priorities

- Variability in VWF:RCo assay in different ethnic groups.

## Appendix

### 1. Risk of bias:

| Author          | Year | Population selection risk of bias | Index test risk of bias | Reference test risk of bias | Flow and timing risk of bias |
|-----------------|------|-----------------------------------|-------------------------|-----------------------------|------------------------------|
| Vangenechten, K | 2018 | High                              | Low                     | Low                         | Low                          |
| de Maistre, E   | 2014 | High                              | Low                     | Low                         | Low                          |
| Chen, D.        | 2011 | Low                               | Low                     | Low                         | Low                          |
| James, P        | 2007 | High                              | Low                     | Low                         | Low                          |
| Caron, C        | 2006 | High                              | Low                     | Low                         | Low                          |
| Adcock, D       | 2006 | Low                               | Low                     | Low                         | Low                          |

### 2. Outcomes:

#### ➤ Diagnostic test accuracy:

- VWF:RCo/Ag<0.5 versus VWF:RCo/Ag<0.6:

| VWF:RCo/Ag <0.5 IU/dL    |                             | VWF:RCo/Ag <0.6 IU/dL    |                             |
|--------------------------|-----------------------------|--------------------------|-----------------------------|
| Sensitivity <sup>e</sup> | 0.68 (95% CI: 0.54 to 0.83) | Sensitivity <sup>e</sup> | 0.85 (95% CI: 0.71 to 0.99) |
| Specificity <sup>f</sup> | 1.00 (95% CI: 0.99 to 1.00) | Specificity              | 0.88 (95% CI: 0.87 to 0.88) |

|             |                  |
|-------------|------------------|
| Prevalences | 30% <sup>d</sup> |
|-------------|------------------|

| Outcome                                   | No of studies (No of patients) | Study design                       | Factors that may decrease certainty of evidence |                      |                      |             |                  | Effect per 1,000 patients tested         |                  | Test accuracy CoE |
|-------------------------------------------|--------------------------------|------------------------------------|-------------------------------------------------|----------------------|----------------------|-------------|------------------|------------------------------------------|------------------|-------------------|
|                                           |                                |                                    | Risk of bias                                    | Indirectness         | Inconsistency        | Imprecision | Publication bias | pre-test probability of 30%              |                  |                   |
|                                           |                                |                                    |                                                 |                      |                      |             |                  | VWF:RCo/Ag <0.5                          | VWF:RCo <0.6     |                   |
| True positives (patients with VWD type 2) | 4 studies<br>145 patients      | cohort & case-control type studies | serious <sup>a</sup>                            | serious <sup>b</sup> | serious <sup>c</sup> | not serious | none             | 204 (162 to 249)                         | 256 (212 to 299) | ⊕○○○<br>VERY LOW  |
|                                           |                                |                                    |                                                 |                      |                      |             |                  | <b>52 fewer TP in VWF:RCo/Ag &lt;0.5</b> |                  |                   |
|                                           |                                |                                    |                                                 |                      |                      |             |                  | 96 (51 to 138)                           | 44 (1 to 88)     |                   |

|                                                                                      |                          |                                    |                      |                      |             |             |            |                  |                                          |             |
|--------------------------------------------------------------------------------------|--------------------------|------------------------------------|----------------------|----------------------|-------------|-------------|------------|------------------|------------------------------------------|-------------|
| <b>False negatives</b><br>(patients incorrectly classified as not having VWD type 2) |                          |                                    |                      |                      |             |             |            |                  | <b>52 more FN in VWF:RCo/Ag &lt;0.5</b>  |             |
| <b>True negatives</b><br>(patients without VWD type 2)                               | 1 studies<br>87 patients | cohort & case-control type studies | serious <sup>a</sup> | serious <sup>b</sup> | not serious | not serious | none       | 700 (693 to 700) | 616 (609 to 616)                         | ⊕⊕○○<br>LOW |
| <b>False positives</b><br>(patients incorrectly classified as having VWD type 2)     |                          |                                    |                      |                      |             |             | 0 (0 to 7) | 84 (84 to 91)    |                                          |             |
|                                                                                      |                          |                                    |                      |                      |             |             |            |                  | <b>84 fewer FP in VWF:RCo/Ag &lt;0.5</b> |             |
|                                                                                      |                          |                                    |                      |                      |             |             |            |                  |                                          |             |

### Explanations

- a. Case Control design leading to serious population selection bias. Also, issues around labeling as type 2M noted.
- b. The studies do not compare the 2 tests cut-offs directly
- c. There is serious unexplained heterogeneity
- d Typically seen in patients investigated for VWD type 2 because of an low VWF:Rco/Ag ratio.
- e. Pooled in proportion, not enough studies to pool as test accuracy results
- f. Specificity assumed to be 100% at a <0.5 cut-off

### ○ VWF:RCo/Ag<0.5 versus VWF:RCo/Ag<0.7:

|                          |                             |                          |                             |             |                  |
|--------------------------|-----------------------------|--------------------------|-----------------------------|-------------|------------------|
| VWF:RCo/Ag <0.5 IU/dL    |                             | VWF:RCo/Ag <0.7 IU/dL    |                             | Prevalences | 30% <sup>e</sup> |
| Sensitivity <sup>f</sup> | 0.68 (95% CI: 0.54 to 0.83) | Sensitivity <sup>f</sup> | 0.90 (95% CI: 0.83 to 0.94) |             |                  |
| Specificity <sup>g</sup> | 1.00 (95% CI: 0.99 to 1.00) | Specificity <sup>g</sup> | 0.91 (95% CI: 0.76 to 0.97) |             |                  |

| Outcome                                                                              | No of studies (No of patients) | Study design                       | Factors that may decrease certainty of evidence |                      |                      |             |                  | Effect per 1,000 patients tested         |                                         | Test accuracy CoE |
|--------------------------------------------------------------------------------------|--------------------------------|------------------------------------|-------------------------------------------------|----------------------|----------------------|-------------|------------------|------------------------------------------|-----------------------------------------|-------------------|
|                                                                                      |                                |                                    | Risk of bias                                    | Indirectness         | Inconsistency        | Imprecision | Publication bias | pre-test probability of 30%              |                                         |                   |
|                                                                                      |                                |                                    |                                                 |                      |                      |             |                  | VWF:RCo/Ag <0.5                          | VWF:RCo/Ag <0.7                         |                   |
| <b>True positives</b><br>(patients with VWD type 2)                                  | 6 studies<br>299 patients      | cohort & case-control type studies | serious <sup>a</sup>                            | serious <sup>b</sup> | serious <sup>c</sup> | not serious | none             | 205 (161 to 249)                         | 270 (249 to 282)                        | ⊕○○○<br>VERY LOW  |
| <b>False negatives</b><br>(patients incorrectly classified as not having VWD type 2) |                                |                                    |                                                 |                      |                      |             |                  | 95 (51 to 139)                           | 30 (18 to 51)                           |                   |
|                                                                                      |                                |                                    |                                                 |                      |                      |             |                  | <b>65 fewer TP in VWF:RCo/Ag &lt;0.5</b> |                                         |                   |
|                                                                                      |                                |                                    |                                                 |                      |                      |             |                  |                                          | <b>65 more FN in VWF:RCo/Ag &lt;0.5</b> |                   |

|                                                                                  |                           |                                    |                      |                      |                      |             |      |                                          |                  |                  |
|----------------------------------------------------------------------------------|---------------------------|------------------------------------|----------------------|----------------------|----------------------|-------------|------|------------------------------------------|------------------|------------------|
| <b>True negatives</b><br>(patients without VWD type 2)                           | 4 studies<br>994 patients | cohort & case-control type studies | serious <sup>a</sup> | serious <sup>d</sup> | serious <sup>c</sup> | not serious | none | 700 (693 to 700)                         | 637 (532 to 679) | ⊕○○○<br>VERY LOW |
|                                                                                  |                           |                                    |                      |                      |                      |             |      | <b>63 more TN in VWF:RCo/Ag &lt;0.5</b>  |                  |                  |
| <b>False positives</b><br>(patients incorrectly classified as having VWD type 2) |                           |                                    |                      |                      |                      |             |      | 0 (0 to 7)                               | 63 (21 to 168)   |                  |
|                                                                                  |                           |                                    |                      |                      |                      |             |      | <b>63 fewer FP in VWF:RCo/Ag &lt;0.5</b> |                  |                  |

### Explanations

- a. Case control design lead to serious patient selection bias. Also, issues around labeling as type 2M noted.
- b. The studies are not comparative
- c. There is high unexplained heterogeneity
- d. The studies are not comparative and the specificity was assumed to be 100% at the 0.5 cut-off
- e. Typically seen in patients investigated for VWD type 2 because of an low VWF:Rco/Ag ratio.
- f. Pooled in proportion, not enough studies to pool as test accuracy results
- g. Specificity assumed to be 100% at a <0.5 cut-off

- VWF:RCo/Ag <0.5:

| Study        | TP | FP | FN | TN | Sensitivity (95% CI) | Specificity (95% CI) | Sensitivity (95% CI) | Specificity (95% CI) |
|--------------|----|----|----|----|----------------------|----------------------|----------------------|----------------------|
| Adcock, 2006 | 38 | 0  | 10 | 0  | 0.79 [0.65, 0.90]    | Not estimable        |                      |                      |
| Caron, 2006  | 18 | 0  | 13 | 0  | 0.58 [0.39, 0.75]    | Not estimable        |                      |                      |
| James, 2007  | 10 | 0  | 6  | 0  | 0.63 [0.35, 0.85]    | Not estimable        |                      |                      |

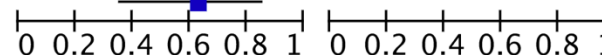

|             |                           |
|-------------|---------------------------|
| Sensitivity | 0.58 to 0.79              |
| Specificity | 0.99 to 1.00 <sup>c</sup> |

Prevalences 30%<sup>b</sup>

| Outcome                                                                              | No of studies (No of patients) | Study design                       | Factors that may decrease certainty of evidence |              |               |             |                  | Effect per 1,000 patients tested<br>pre-test probability of 30% | Test accuracy<br>CoE |
|--------------------------------------------------------------------------------------|--------------------------------|------------------------------------|-------------------------------------------------|--------------|---------------|-------------|------------------|-----------------------------------------------------------------|----------------------|
|                                                                                      |                                |                                    | Risk of bias                                    | Indirectness | Inconsistency | Imprecision | Publication bias |                                                                 |                      |
| <b>True positives</b><br>(patients with VWD type 2)                                  | 3 studies<br>95 patients       | cohort & case-control type studies | serious <sup>a</sup>                            | not serious  | not serious   | not serious | none             | 174 to 237                                                      | ⊕⊕⊕○<br>MODERATE     |
| <b>False negatives</b><br>(patients incorrectly classified as not having VWD type 2) |                                |                                    |                                                 |              |               |             |                  | 63 to 126                                                       |                      |
| <b>True negatives</b><br>(patients without VWD type 2)                               | 0 studies<br>patients          |                                    |                                                 |              |               |             |                  | 693 to 700                                                      |                      |

|                                                                                  |  |  |  |  |  |  |  |  |        |  |
|----------------------------------------------------------------------------------|--|--|--|--|--|--|--|--|--------|--|
| <b>False positives</b><br>(patients incorrectly classified as having VWD type 2) |  |  |  |  |  |  |  |  | 0 to 7 |  |
|----------------------------------------------------------------------------------|--|--|--|--|--|--|--|--|--------|--|

**Explanations**

- a. Serious patient selection risk of bias due to case-control design. Also, issues around labeling as type 2M noted.
- b. Typically seen in patients investigated for VWD because of a personal history of abnormal laboratory test (e.g., increased PTT).
- c. Specificity assumed to be 100% with a <0.5 ratio cut-off.

○ VWF:RCo/Ag <0.6:

| Study              | TP | FP | FN | TN | Sensitivity (95% CI) | Specificity (95% CI) | Sensitivity (95% CI) | Specificity (95% CI) |
|--------------------|----|----|----|----|----------------------|----------------------|----------------------|----------------------|
| Caron, 2006        | 21 | 0  | 10 | 0  | 0.68 [0.49, 0.83]    | Not estimable        |                      |                      |
| James, 2007        | 16 | 0  | 0  | 0  | 1.00 [0.79, 1.00]    | Not estimable        |                      |                      |
| Vangenechten, 2018 | 43 | 11 | 7  | 76 | 0.86 [0.73, 0.94]    | 0.87 [0.79, 0.94]    |                      |                      |

|             |              |
|-------------|--------------|
| Sensitivity | 0.68 to 0.97 |
| Specificity | 0.87 to 0.88 |

Prevalences 30%<sup>c</sup>

| Outcome                                                                              | No of studies (No of patients) | Study design                       | Factors that may decrease certainty of evidence |              |                      |             |                  | Effect per 1,000 patients tested<br>pre-test probability of 30% | Test accuracy<br>CoE |
|--------------------------------------------------------------------------------------|--------------------------------|------------------------------------|-------------------------------------------------|--------------|----------------------|-------------|------------------|-----------------------------------------------------------------|----------------------|
|                                                                                      |                                |                                    | Risk of bias                                    | Indirectness | Inconsistency        | Imprecision | Publication bias |                                                                 |                      |
| <b>True positives</b><br>(patients with VWD type 2)                                  | 3 studies<br>97 patients       | cohort & case-control type studies | serious <sup>a</sup>                            | not serious  | serious <sup>b</sup> | not serious | none             | 203 to 291                                                      | ⊕⊕○○<br>LOW          |
| 9 to 97                                                                              |                                |                                    |                                                 |              |                      |             |                  |                                                                 |                      |
| <b>False negatives</b><br>(patients incorrectly classified as not having VWD type 2) |                                |                                    |                                                 |              |                      |             |                  |                                                                 |                      |
| <b>True negatives</b><br>(patients without VWD type 2)                               | 1 studies<br>87 patients       | cohort & case-control type studies | serious <sup>a</sup>                            | not serious  | not serious          | not serious | none             | 612 to 612                                                      | ⊕⊕⊕○<br>MODERATE     |
| 88 to 88                                                                             |                                |                                    |                                                 |              |                      |             |                  |                                                                 |                      |
| <b>False positives</b><br>(patients incorrectly classified as having VWD type 2)     |                                |                                    |                                                 |              |                      |             |                  |                                                                 |                      |

**Explanations**

- a. Serious patient selection risk of bias due to case-control design. Also, issues around labeling as type 2M noted.
- b. Confidence intervals do not cross the effect estimates of different studies
- c. Typically seen in patients investigated for VWD type 2 because of an low VWF:Rco/Ag ratio.

○ VWF:RCo/Ag <0.7:

| Studies                                        | Sensitivity                 | Ev/Trt         |
|------------------------------------------------|-----------------------------|----------------|
| Vangenechten, K 2018                           | 0.920 (0.845, 0.995)        | 46/50          |
| de Maistre, E 2014                             | 0.851 (0.749, 0.953)        | 40/47          |
| Chen, D. 2011                                  | 0.857 (0.728, 0.987)        | 24/28          |
| Caron, C 2006                                  | 0.935 (0.849, 1.000)        | 29/31          |
| Adcock, D 2006                                 | 0.990 (0.962, 1.000)        | 48/48          |
| <b>Overall (I<sup>2</sup>=6740 %, P=0.015)</b> | <b>0.925 (0.866, 0.984)</b> | <b>187/204</b> |

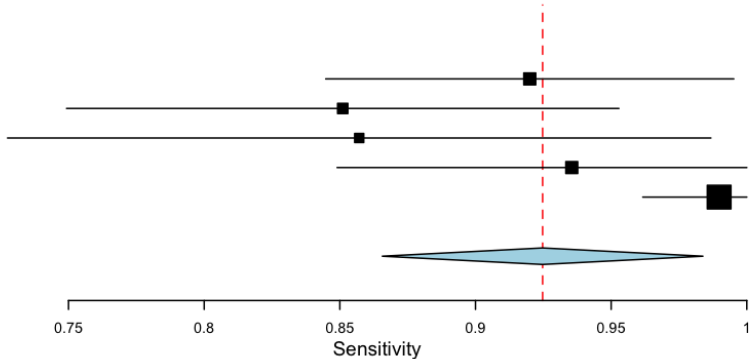

| Studies                                            | Specificity                 | Ev/Trt         |
|----------------------------------------------------|-----------------------------|----------------|
| Vangenechten, K 2018                               | 0.724 (0.630, 0.818)        | 63/87          |
| de Maistre, E 2014                                 | 0.848 (0.726, 0.971)        | 28/33          |
| Chen, D. 2011                                      | 0.991 (0.981, 1.000)        | 421/425        |
| Adcock, D 2006                                     | 0.708 (0.666, 0.750)        | 318/449        |
| <b>Overall (I<sup>2</sup>=9848 %, P&lt; 0.001)</b> | <b>0.819 (0.630, 1.008)</b> | <b>830/994</b> |

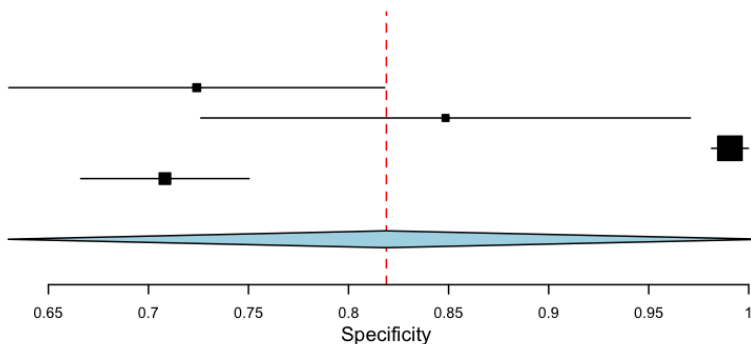

|                          |                             |
|--------------------------|-----------------------------|
| Sensitivity <sup>d</sup> | 0.90 (95% CI: 0.83 to 0.94) |
| Specificity <sup>d</sup> | 0.91 (95% CI: 0.76 to 0.97) |

Prevalences 30%<sup>c</sup>

| Outcome                                                                              | No of studies (No of patients) | Study design                       | Factors that may decrease certainty of evidence |              |                      |                      |                  | Effect per 1,000 patients tested | Test accuracy CoE |
|--------------------------------------------------------------------------------------|--------------------------------|------------------------------------|-------------------------------------------------|--------------|----------------------|----------------------|------------------|----------------------------------|-------------------|
|                                                                                      |                                |                                    | Risk of bias                                    | Indirectness | Inconsistency        | Imprecision          | Publication bias | pre-test probability of 30%      |                   |
| <b>True positives</b><br>(patients with VWD type 2)                                  | 5 studies<br>204 patients      | cohort & case-control type studies | serious <sup>a</sup>                            | not serious  | not serious          | not serious          | none             | 269 (249 to 281)                 | ⊕⊕⊕○<br>MODERATE  |
| <b>False negatives</b><br>(patients incorrectly classified as not having VWD type 2) |                                |                                    |                                                 |              |                      |                      |                  | 31 (19 to 51)                    |                   |
| <b>True negatives</b><br>(patients without VWD type 2)                               | 4 studies<br>994 patients      | cohort & case-control type studies | serious <sup>a</sup>                            | not serious  | serious <sup>b</sup> | serious <sup>c</sup> | none             | 573 (441 to 700)                 |                   |

|                                                                           |  |  |  |  |  |  |  |  |                |                  |
|---------------------------------------------------------------------------|--|--|--|--|--|--|--|--|----------------|------------------|
| False positives<br>(patients incorrectly classified as having VWD type 2) |  |  |  |  |  |  |  |  | 127 (0 to 259) | ⊕○○○<br>VERY LOW |
|---------------------------------------------------------------------------|--|--|--|--|--|--|--|--|----------------|------------------|

**Explanations**

- a. Serious patient selection risk of bias due to case-control design. Also, issues around labeling as type 2M noted.
- b. Considering the upper versus the lower boundary of the estimate effect would may lead to different clinical decision
- c. Typically seen in patients investigated for VWD type 2 because of an low VWF:Rco/Ag ratio.
- d. Pooled in proportion, not enough studies to pool as test accuracy results

[https://gdt.gradepro.org/presentations/#/isof/isof\\_8e790c07-29f2-4ced-8bbd-9647785c4e60-1573056703410](https://gdt.gradepro.org/presentations/#/isof/isof_8e790c07-29f2-4ced-8bbd-9647785c4e60-1573056703410)

➤ **Mutation detection:**

| Author, year | Study type                      | Outcomes                         | Results                                                                                                                                                                                                                                                                                                                                                                                                                                                  |
|--------------|---------------------------------|----------------------------------|----------------------------------------------------------------------------------------------------------------------------------------------------------------------------------------------------------------------------------------------------------------------------------------------------------------------------------------------------------------------------------------------------------------------------------------------------------|
| James, 2007  | Cross sectional<br>Case control | VWF:Rco and mutation correlation | identified 8 different missense mutations (R854Q, T1054M, R1315C, R1374C, R1374H, L1382P, S2179F, and T2647M) within these 16 families. it was significantly more likely to identify a VWF mutation in cases with RCo/Ag ratios < 0.50 (P < 0.05, chi- squared test). Importantly, every index case with an RCo/Ag ratio < 0.40 (4/4 index cases) had a mutation identified within the A1 domain, in contrast to 1/12 cases with an RCo/Ag ratio > 0.40. |

**References:**

1. I. M. Vangenechten K, Smejkal, P., Zapletal, O., Michiels, J. J., Moore, G. W., Gadisseur, A. A comparative analysis of different automated von Willebrand factor glycoprotein Ib-binding activity assays in well typed von Willebrand disease patients. 2018.
2. de Maistre E, Volot, F., Mourey, G., Aho, L. S., Ternisien, C., Briquel, M. E., Bertrand, M. A., Tardy, B., Frotscher, B., Nguyen, P., Dumont, L., Vandroux, D., Hezard, N., Trossaert, M. Performance of two new automated assays for measuring von Willebrand activity: HemosIL AcuStar and Innovance. Thrombosis and Haemostasis. 2014;112(4):825-830.
3. Chen D, Tange, J. I., Meyers, B. J., Pruthi, R. K., Nichols, W. L., Heit, J. A. Validation of an automated latex particle-enhanced immunoturbidimetric von Willebrand factor activity assay. Journal of Thrombosis and Haemostasis. 2011;9(10):1993-2002.
4. James PD, Notley, C., Hegadorn, C., Poon, M. C., Walker, I., Rapson, D., Lillicrap, D., Association of Hemophilia Clinic Directors of, Canada. Challenges in defining type 2M von Willebrand disease: results from a Canadian cohort study. J Thromb Haemost. 2007;5(9):1914-1922.

5. Caron C, Hilbert, L., Vanhoorelbeke, K., Deckmyn, H., Goudemand, J., Mazurier, C. Measurement of von Willebrand factor binding to a recombinant fragment of glycoprotein Ibalpha in an enzyme-linked immunosorbent assay-based method: Performances in patients with type 2B von Willebrand disease. *Br J Haematol.* 2006;133(6):655-663.
6. Adcock DM, Bethel, M., Valcour, A. Diagnosing von Willebrand disease: A large reference laboratory's perspective. *Seminars in Thrombosis and Hemostasis.* 2006;32(5):472-479.
7. Redaelli R, Corno, A. R., Borroni, L., Mostarda, G., Nichelatti, M., Morra, E., Baudo, F. Von Willebrand factor ristocetin cofactor (VWF:RCO) assay: Implementation on an automated coagulometer (ACL). *Journal of Thrombosis and Haemostasis.* 2005;3(12):2684-2688.



## QUESTION

| Should VWF multimer analysis vs. VWF:CB/Ag ratio be used to diagnose patients with VWD type 2 in Patients suspected of VWD type 2? |                                                                                                                                                                                                                                                                                                                                                                                                                                                                                                                                                                                                                                                                                                                                                                                                                                                                                             |
|------------------------------------------------------------------------------------------------------------------------------------|---------------------------------------------------------------------------------------------------------------------------------------------------------------------------------------------------------------------------------------------------------------------------------------------------------------------------------------------------------------------------------------------------------------------------------------------------------------------------------------------------------------------------------------------------------------------------------------------------------------------------------------------------------------------------------------------------------------------------------------------------------------------------------------------------------------------------------------------------------------------------------------------|
| <b>POPULATION:</b>                                                                                                                 | Patients suspected of VWD type 2 (Rec)                                                                                                                                                                                                                                                                                                                                                                                                                                                                                                                                                                                                                                                                                                                                                                                                                                                      |
| <b>INTERVENTION:</b>                                                                                                               | VWF multimer analysis                                                                                                                                                                                                                                                                                                                                                                                                                                                                                                                                                                                                                                                                                                                                                                                                                                                                       |
| <b>COMPARISON:</b>                                                                                                                 | VWF:CB/Ag ratio                                                                                                                                                                                                                                                                                                                                                                                                                                                                                                                                                                                                                                                                                                                                                                                                                                                                             |
| <b>PURPOSE OF THE TEST:</b>                                                                                                        | Identify subtype of VWD in VWD type 2 patients                                                                                                                                                                                                                                                                                                                                                                                                                                                                                                                                                                                                                                                                                                                                                                                                                                              |
| <b>ROLE OF THE TEST:</b>                                                                                                           | Identify subtype of VWD in VWD type 2 patients                                                                                                                                                                                                                                                                                                                                                                                                                                                                                                                                                                                                                                                                                                                                                                                                                                              |
| <b>LINKED TREATMENTS:</b>                                                                                                          | Desmopressin, Tranexamic acid, Factor replacement                                                                                                                                                                                                                                                                                                                                                                                                                                                                                                                                                                                                                                                                                                                                                                                                                                           |
| <b>ANTICIPATED OUTCOMES:</b>                                                                                                       | VWF:CB – False positive, VWF:CB – False negative, VWF:CB – True positive, VWF:CB – True negative Major bleeding, transfusion and treatment, blood loss, gastrointestinal bleeding, symptom severity, minor bleeding, mortality.                                                                                                                                                                                                                                                                                                                                                                                                                                                                                                                                                                                                                                                             |
| <b>SETTING:</b>                                                                                                                    | Outpatient                                                                                                                                                                                                                                                                                                                                                                                                                                                                                                                                                                                                                                                                                                                                                                                                                                                                                  |
| <b>PERSPECTIVE:</b>                                                                                                                | Clinical recommendation – population perspective                                                                                                                                                                                                                                                                                                                                                                                                                                                                                                                                                                                                                                                                                                                                                                                                                                            |
| <b>BACKGROUND:</b>                                                                                                                 | <p>Von Willebrand disease (VWD) is the most common inherited bleeding disorder known in humans: while estimated to affect between 0.1 and 1% of the general population, many are never diagnosed. VWD diagnosis and classification require numerous laboratory tests. (Pathare, 2018). Type 2 VWD accounts for 25% of cases and results from the expression of a functionally abnormal VWF molecule (Lavin 2017). Diagnosis and classification of VWD requires correlation between clinical findings and laboratory results. Recommended initial laboratory tests include measurements of plasma VWF antigen (VWF:Ag), VWF-platelet GP Ib binding activity (e.g. VWF:RCo) and FVIII:C (Chenn, 2011). The ratio of VWF:RCo/VWF:Ag is used to distinguish type 2 from other VWD types. More tests like multimer analysis and VWF:CB are used to characterize the subtypes of the disease.</p> |
| <b>SUBGROUPS:</b>                                                                                                                  |                                                                                                                                                                                                                                                                                                                                                                                                                                                                                                                                                                                                                                                                                                                                                                                                                                                                                             |
| <b>CONFLICT OF INTERESTS:</b>                                                                                                      | <p>ASH conflict of interest declaration and management policies were applied, and the following panel members were voting panel members (determining the direction and strength of the recommendation): Sandra Haberichter, Jeroen Eikenboom, Barbara Konkle, Robert Sidonio Jr, Simon McRae, Robert Montgomery, James O'Donnell, Claire McLintock, Barbara Ameer, Nicolas Giraud, Nikole Scappe, Vicki Jacobs-Pratt, Paula James, Nathan Connell.</p> <p>No panel members were recused as a result of risk of conflicts of interest.</p>                                                                                                                                                                                                                                                                                                                                                   |

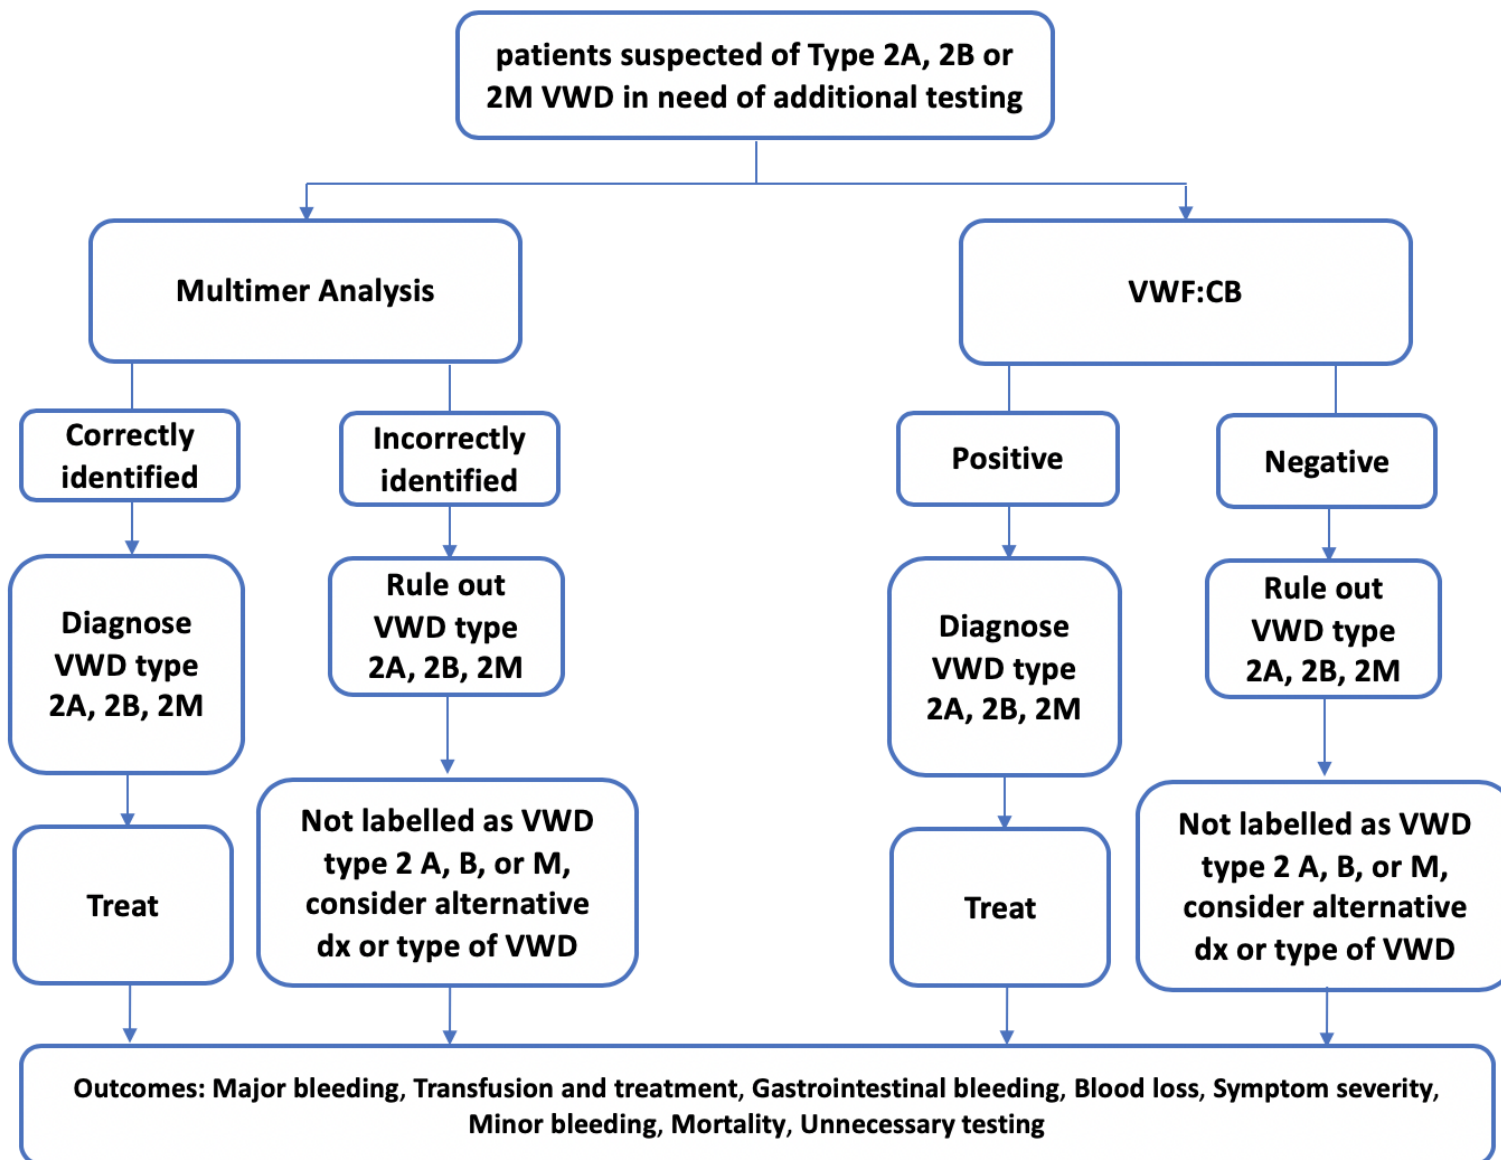

#### ASSESSMENT

##### Problem

Is the problem a priority?

##### JUDGEMENT

##### RESEARCH EVIDENCE

##### ADDITIONAL CONSIDERATIONS

|                                                                                                                                                                                                                                                                                                 |                                                                                                                                                                                                                                                                                                                                                                                                                                                                                                                                                                                                                                                                                                                                                                                                                                                                                               |                                                                                                                 |
|-------------------------------------------------------------------------------------------------------------------------------------------------------------------------------------------------------------------------------------------------------------------------------------------------|-----------------------------------------------------------------------------------------------------------------------------------------------------------------------------------------------------------------------------------------------------------------------------------------------------------------------------------------------------------------------------------------------------------------------------------------------------------------------------------------------------------------------------------------------------------------------------------------------------------------------------------------------------------------------------------------------------------------------------------------------------------------------------------------------------------------------------------------------------------------------------------------------|-----------------------------------------------------------------------------------------------------------------|
| <ul style="list-style-type: none"> <li><input type="radio"/> No</li> <li><input type="radio"/> Probably no</li> <li><input type="radio"/> Probably yes</li> <li><input checked="" type="radio"/> Yes</li> <li><input type="radio"/> Varies</li> <li><input type="radio"/> Don't know</li> </ul> | <p>Von Willebrand disease (VWD) is the most common inherited bleeding disorder known in humans: while estimated to affect between 0.1 and 1% of the general population, many are never diagnosed. VWD diagnosis and classification require numerous laboratory tests. (Pathare, 2018). Type 2 VWD accounts for 25% of cases and results from the expression of a functionally abnormal VWF molecule (Lavin 2017). Diagnosis and classification of VWD require correlation between clinical findings and laboratory results. Recommended initial laboratory tests include measurements of plasma VWF antigen (VWF:Ag), VWF-platelet GP Ib binding activity (e.g. VWF:RCo) and FVIII:C (Chenn, 2011). The ratio of VWF:RCo/VWF:Ag is used to distinguish type 2 from other VWD types. More tests like multimer analysis and VWF:CB/Ag are used to characterize the subtypes of the disease.</p> | <p>This question was judged to be a priority among many candidate questions to address in these guidelines.</p> |
|-------------------------------------------------------------------------------------------------------------------------------------------------------------------------------------------------------------------------------------------------------------------------------------------------|-----------------------------------------------------------------------------------------------------------------------------------------------------------------------------------------------------------------------------------------------------------------------------------------------------------------------------------------------------------------------------------------------------------------------------------------------------------------------------------------------------------------------------------------------------------------------------------------------------------------------------------------------------------------------------------------------------------------------------------------------------------------------------------------------------------------------------------------------------------------------------------------------|-----------------------------------------------------------------------------------------------------------------|

**Test accuracy**  
How accurate is the test?

| <b>JUDGEMENT</b>                                                                                                                                                                                                                                                                                                  | <b>RESEARCH EVIDENCE</b>                                                                                                                                                                                                                                                                                                                                                                                                                                                                                                                                                                                                                                                                                                                                                                                                                                                                                                                                                                                                                                                                                                                                                                                                                                                                                                                                                     | <b>ADDITIONAL CONSIDERATIONS</b> |                                                     |                                   |                              |                                   |                |  |                       |           |                                                       |                  |                  |         |                                 |                                     |  |                                                                                        |              |                |         |  |                                     |  |                                                                                                                                                                                                                                                                                                                                                                                                                                                             |
|-------------------------------------------------------------------------------------------------------------------------------------------------------------------------------------------------------------------------------------------------------------------------------------------------------------------|------------------------------------------------------------------------------------------------------------------------------------------------------------------------------------------------------------------------------------------------------------------------------------------------------------------------------------------------------------------------------------------------------------------------------------------------------------------------------------------------------------------------------------------------------------------------------------------------------------------------------------------------------------------------------------------------------------------------------------------------------------------------------------------------------------------------------------------------------------------------------------------------------------------------------------------------------------------------------------------------------------------------------------------------------------------------------------------------------------------------------------------------------------------------------------------------------------------------------------------------------------------------------------------------------------------------------------------------------------------------------|----------------------------------|-----------------------------------------------------|-----------------------------------|------------------------------|-----------------------------------|----------------|--|-----------------------|-----------|-------------------------------------------------------|------------------|------------------|---------|---------------------------------|-------------------------------------|--|----------------------------------------------------------------------------------------|--------------|----------------|---------|--|-------------------------------------|--|-------------------------------------------------------------------------------------------------------------------------------------------------------------------------------------------------------------------------------------------------------------------------------------------------------------------------------------------------------------------------------------------------------------------------------------------------------------|
| <ul style="list-style-type: none"> <li><input type="radio"/> Very inaccurate</li> <li><input type="radio"/> Inaccurate</li> <li><input checked="" type="radio"/> Accurate</li> <li><input type="radio"/> Very accurate</li> <li><input type="radio"/> Varies</li> <li><input type="radio"/> Don't know</li> </ul> | <p>Data presented in some studies for all type 2 VWD patients together, and in other studies separated by subtypes (2A, 2B, 2M). Some studies have a case-control design and others have a cohort design. Data about VWF:CB/Ag is presented with different cut-offs in different studies (&lt;0.5, &lt;0.6, &lt;0.7) that were pooled.</p> <table border="1" data-bbox="533 922 1409 1463"> <thead> <tr> <th rowspan="3">Test result</th> <th colspan="2">Number of results per 1000 patients tested (95% CI)</th> <th rowspan="3">No of participants (studies)</th> <th rowspan="3">Certainty of the evidence (GRADE)</th> </tr> <tr> <th colspan="2">Prevalence 80%</th> </tr> <tr> <th>VWF multimer analysis</th> <th>VWF:CB/Ag</th> </tr> </thead> <tbody> <tr> <td rowspan="2">True positives patients with patients with VWD type 2</td> <td>720 (720 to 792)</td> <td>720 (624 to 768)</td> <td rowspan="2">476 (9)</td> <td rowspan="2">⊕○○○<br/>VERY LOW<sup>a,b</sup></td> </tr> <tr> <td colspan="2">0 fewer TP in VWF multimer analysis</td> </tr> <tr> <td rowspan="2">False negatives patients incorrectly classified as not having patients with VWD type 2</td> <td>80 (8 to 80)</td> <td>80 (32 to 176)</td> <td rowspan="2">948 (9)</td> <td rowspan="2"></td> </tr> <tr> <td colspan="2">0 fewer FN in VWF multimer analysis</td> </tr> </tbody> </table> | Test result                      | Number of results per 1000 patients tested (95% CI) |                                   | No of participants (studies) | Certainty of the evidence (GRADE) | Prevalence 80% |  | VWF multimer analysis | VWF:CB/Ag | True positives patients with patients with VWD type 2 | 720 (720 to 792) | 720 (624 to 768) | 476 (9) | ⊕○○○<br>VERY LOW <sup>a,b</sup> | 0 fewer TP in VWF multimer analysis |  | False negatives patients incorrectly classified as not having patients with VWD type 2 | 80 (8 to 80) | 80 (32 to 176) | 948 (9) |  | 0 fewer FN in VWF multimer analysis |  | <p>The good results in the multimer analysis evaluations in the different studies are due to the high quality control standards under which the test was performed, as all were done in centers of excellence.</p> <p>Very low VWF antigen levels (&lt;0.15) will lead to unreliable VWF:CB/Ag and VWF:RCo/Ag ratios.</p> <p>The panel agreed that 2M is defined by the multimers results, making this assay as the reference standard for type 2M VWD.</p> |
| Test result                                                                                                                                                                                                                                                                                                       | Number of results per 1000 patients tested (95% CI)                                                                                                                                                                                                                                                                                                                                                                                                                                                                                                                                                                                                                                                                                                                                                                                                                                                                                                                                                                                                                                                                                                                                                                                                                                                                                                                          |                                  | No of participants (studies)                        | Certainty of the evidence (GRADE) |                              |                                   |                |  |                       |           |                                                       |                  |                  |         |                                 |                                     |  |                                                                                        |              |                |         |  |                                     |  |                                                                                                                                                                                                                                                                                                                                                                                                                                                             |
|                                                                                                                                                                                                                                                                                                                   | Prevalence 80%                                                                                                                                                                                                                                                                                                                                                                                                                                                                                                                                                                                                                                                                                                                                                                                                                                                                                                                                                                                                                                                                                                                                                                                                                                                                                                                                                               |                                  |                                                     |                                   |                              |                                   |                |  |                       |           |                                                       |                  |                  |         |                                 |                                     |  |                                                                                        |              |                |         |  |                                     |  |                                                                                                                                                                                                                                                                                                                                                                                                                                                             |
|                                                                                                                                                                                                                                                                                                                   | VWF multimer analysis                                                                                                                                                                                                                                                                                                                                                                                                                                                                                                                                                                                                                                                                                                                                                                                                                                                                                                                                                                                                                                                                                                                                                                                                                                                                                                                                                        | VWF:CB/Ag                        |                                                     |                                   |                              |                                   |                |  |                       |           |                                                       |                  |                  |         |                                 |                                     |  |                                                                                        |              |                |         |  |                                     |  |                                                                                                                                                                                                                                                                                                                                                                                                                                                             |
| True positives patients with patients with VWD type 2                                                                                                                                                                                                                                                             | 720 (720 to 792)                                                                                                                                                                                                                                                                                                                                                                                                                                                                                                                                                                                                                                                                                                                                                                                                                                                                                                                                                                                                                                                                                                                                                                                                                                                                                                                                                             | 720 (624 to 768)                 | 476 (9)                                             | ⊕○○○<br>VERY LOW <sup>a,b</sup>   |                              |                                   |                |  |                       |           |                                                       |                  |                  |         |                                 |                                     |  |                                                                                        |              |                |         |  |                                     |  |                                                                                                                                                                                                                                                                                                                                                                                                                                                             |
|                                                                                                                                                                                                                                                                                                                   | 0 fewer TP in VWF multimer analysis                                                                                                                                                                                                                                                                                                                                                                                                                                                                                                                                                                                                                                                                                                                                                                                                                                                                                                                                                                                                                                                                                                                                                                                                                                                                                                                                          |                                  |                                                     |                                   |                              |                                   |                |  |                       |           |                                                       |                  |                  |         |                                 |                                     |  |                                                                                        |              |                |         |  |                                     |  |                                                                                                                                                                                                                                                                                                                                                                                                                                                             |
| False negatives patients incorrectly classified as not having patients with VWD type 2                                                                                                                                                                                                                            | 80 (8 to 80)                                                                                                                                                                                                                                                                                                                                                                                                                                                                                                                                                                                                                                                                                                                                                                                                                                                                                                                                                                                                                                                                                                                                                                                                                                                                                                                                                                 | 80 (32 to 176)                   | 948 (9)                                             |                                   |                              |                                   |                |  |                       |           |                                                       |                  |                  |         |                                 |                                     |  |                                                                                        |              |                |         |  |                                     |  |                                                                                                                                                                                                                                                                                                                                                                                                                                                             |
|                                                                                                                                                                                                                                                                                                                   | 0 fewer FN in VWF multimer analysis                                                                                                                                                                                                                                                                                                                                                                                                                                                                                                                                                                                                                                                                                                                                                                                                                                                                                                                                                                                                                                                                                                                                                                                                                                                                                                                                          |                                  |                                                     |                                   |                              |                                   |                |  |                       |           |                                                       |                  |                  |         |                                 |                                     |  |                                                                                        |              |                |         |  |                                     |  |                                                                                                                                                                                                                                                                                                                                                                                                                                                             |

|                                                                                    |                                                                                                                                                                                                                                                                                                                                                                                                                                                                                                                                                                                                                                                                                                                                                                                                                                                                                                                                                                                                                                                                                   |                                                          |                                    |  |                                 |                                                                                    |             |              |                                     |  |
|------------------------------------------------------------------------------------|-----------------------------------------------------------------------------------------------------------------------------------------------------------------------------------------------------------------------------------------------------------------------------------------------------------------------------------------------------------------------------------------------------------------------------------------------------------------------------------------------------------------------------------------------------------------------------------------------------------------------------------------------------------------------------------------------------------------------------------------------------------------------------------------------------------------------------------------------------------------------------------------------------------------------------------------------------------------------------------------------------------------------------------------------------------------------------------|----------------------------------------------------------|------------------------------------|--|---------------------------------|------------------------------------------------------------------------------------|-------------|--------------|-------------------------------------|--|
|                                                                                    | <table border="1"> <tr> <td data-bbox="520 90 808 207">True negatives patients without patients with VWD type 2</td> <td colspan="2" data-bbox="808 90 1113 207">4 more TN in VWF multimer analysis</td> <td data-bbox="1113 90 1417 207" rowspan="3">⊕○○○<br/>VERY LOW<sup>a,b</sup></td> </tr> <tr> <td data-bbox="520 207 808 332" rowspan="2">False positives patients incorrectly classified as having patients with VWD type 2</td> <td data-bbox="808 207 955 251">6 (2 to 12)</td> <td data-bbox="955 207 1113 251">10 (4 to 22)</td> </tr> <tr> <td colspan="2" data-bbox="808 251 1113 332">4 fewer FP in VWF multimer analysis</td> </tr> </table> <p data-bbox="520 332 1417 568"> a. Case-control design makes patient selection bias serious. Different cut-offs were used in the VWF:CB/Ag ratios (0.5 in Popov versus 0.7 in Flood)<br/> b. A different clinical decision would be considered if the upper versus lower boundary of the pooled effect estimate was used </p> <p data-bbox="520 568 1417 662">Refer to the Appendix at the end of the document</p> | True negatives patients without patients with VWD type 2 | 4 more TN in VWF multimer analysis |  | ⊕○○○<br>VERY LOW <sup>a,b</sup> | False positives patients incorrectly classified as having patients with VWD type 2 | 6 (2 to 12) | 10 (4 to 22) | 4 fewer FP in VWF multimer analysis |  |
| True negatives patients without patients with VWD type 2                           | 4 more TN in VWF multimer analysis                                                                                                                                                                                                                                                                                                                                                                                                                                                                                                                                                                                                                                                                                                                                                                                                                                                                                                                                                                                                                                                |                                                          | ⊕○○○<br>VERY LOW <sup>a,b</sup>    |  |                                 |                                                                                    |             |              |                                     |  |
| False positives patients incorrectly classified as having patients with VWD type 2 | 6 (2 to 12)                                                                                                                                                                                                                                                                                                                                                                                                                                                                                                                                                                                                                                                                                                                                                                                                                                                                                                                                                                                                                                                                       | 10 (4 to 22)                                             |                                    |  |                                 |                                                                                    |             |              |                                     |  |
|                                                                                    | 4 fewer FP in VWF multimer analysis                                                                                                                                                                                                                                                                                                                                                                                                                                                                                                                                                                                                                                                                                                                                                                                                                                                                                                                                                                                                                                               |                                                          |                                    |  |                                 |                                                                                    |             |              |                                     |  |

**Desirable Effects**  
How substantial are the desirable anticipated effects?

| JUDGEMENT                                                                                                                                                 | RESEARCH EVIDENCE                                                                                                                                                                                                                                                                                                                                                                                                                                                                                                                                                                                                                                                                                                                                                                                                                                                                                                                                                                                                                                                                                                                                                                                                                                    | ADDITIONAL CONSIDERATIONS |
|-----------------------------------------------------------------------------------------------------------------------------------------------------------|------------------------------------------------------------------------------------------------------------------------------------------------------------------------------------------------------------------------------------------------------------------------------------------------------------------------------------------------------------------------------------------------------------------------------------------------------------------------------------------------------------------------------------------------------------------------------------------------------------------------------------------------------------------------------------------------------------------------------------------------------------------------------------------------------------------------------------------------------------------------------------------------------------------------------------------------------------------------------------------------------------------------------------------------------------------------------------------------------------------------------------------------------------------------------------------------------------------------------------------------------|---------------------------|
| <ul style="list-style-type: none"> <li>● Trivial</li> <li>○ Small</li> <li>○ Moderate</li> <li>○ Large</li> <li>○ Varies</li> <li>○ Don't know</li> </ul> | <p><b>True Positive:</b> These are patients who have VWD type 2A, 2B, 2M and who received preventive and appropriate treatment. They benefit from decreasing the risk of bleeding with treatment and they suffer the side effects of treatment.</p> <p><b>True Negative:</b> These are patients who did not have VWD type 2A, 2B, 2M and who were correctly identified as not having the disease. They will appropriately not receive treatment for VWD type 2A, 2B, 2M and not suffer the side effects of treatment but may benefit from treatment for other bleeding disorders.</p> <p><b>False Negative:</b> These are patients who have VWD type 2A, 2B, 2M but the diagnosis was missed and will be sent home without appropriate treatment. They face the risks of prolonged and heavy bleeding due to not receiving treatment. They will be considered for other bleeding disorders.</p> <p><b>False Positive:</b> These are patients who did not have VWD type 2A, 2B, 2M but they will be labeled as having VWD type 2A, 2B, 2M and receive unnecessary treatment. They do not benefit from the treatment for type 2A, 2B, 2M. They may benefit from the treatment if they have other bleeding disorders, but they suffer side effects.</p> |                           |

|  |                                                  |  |
|--|--------------------------------------------------|--|
|  | Refer to the Appendix at the end of the document |  |
|--|--------------------------------------------------|--|

**Undesirable Effects**  
How substantial are the undesirable anticipated effects?

| JUDGEMENT                                                                                                                                                 | RESEARCH EVIDENCE                                                                                                                                                                                                                                                                                                                                                                                                                                                                                                                                                                                                                                                                                                                                                                                                                                                                                                                                                                                                                                                                                                                                                                                                                                                                                            | ADDITIONAL CONSIDERATIONS |
|-----------------------------------------------------------------------------------------------------------------------------------------------------------|--------------------------------------------------------------------------------------------------------------------------------------------------------------------------------------------------------------------------------------------------------------------------------------------------------------------------------------------------------------------------------------------------------------------------------------------------------------------------------------------------------------------------------------------------------------------------------------------------------------------------------------------------------------------------------------------------------------------------------------------------------------------------------------------------------------------------------------------------------------------------------------------------------------------------------------------------------------------------------------------------------------------------------------------------------------------------------------------------------------------------------------------------------------------------------------------------------------------------------------------------------------------------------------------------------------|---------------------------|
| <ul style="list-style-type: none"> <li>○ Large</li> <li>○ Moderate</li> <li>○ Small</li> <li>● Trivial</li> <li>○ Varies</li> <li>○ Don't know</li> </ul> | <p><b>True Positive:</b> These are patients who have VWD type 2A, 2B, 2M and who received preventive and appropriate treatment. They benefit from decreasing the risk of bleeding with treatment and they suffer the side effects of treatment.</p> <p><b>True Negative:</b> These are patients who did not have VWD type 2A, 2B, 2M and who were correctly identified as not having the disease. They will appropriately not receive treatment for VWD type 2A, 2B, 2M and not suffer the side effects of treatment but may benefit from treatment for other bleeding disorders.</p> <p><b>False Negative:</b> These are patients who have VWD type 2A, 2B, 2M but the diagnosis was missed and will be sent home without appropriate treatment. They face the risks of prolonged and heavy bleeding due to not receiving treatment. They will be considered for other bleeding disorders.</p> <p><b>False Positive:</b> These are patients who did not have VWD type 2A, 2B, 2M but they will be labeled as having VWD type 2A, 2B, 2M and receive unnecessary treatment. They do not benefit from the treatment for type 2A, 2B, 2M. They may benefit from the treatment if they have other bleeding disorders, but they suffer side effects.</p> <p>Refer to the Appendix at the end of the document</p> |                           |

**Certainty of the evidence of test accuracy**  
What is the overall certainty of the evidence of test accuracy?

| JUDGEMENT | RESEARCH EVIDENCE | ADDITIONAL CONSIDERATIONS |
|-----------|-------------------|---------------------------|
|-----------|-------------------|---------------------------|

|                                                                                                                                                |                                                          |                                                                                                                                                                                                                                                                                                                                      |
|------------------------------------------------------------------------------------------------------------------------------------------------|----------------------------------------------------------|--------------------------------------------------------------------------------------------------------------------------------------------------------------------------------------------------------------------------------------------------------------------------------------------------------------------------------------|
| <ul style="list-style-type: none"> <li>● Very low</li> <li>○ Low</li> <li>○ Moderate</li> <li>○ High</li> <li>○ No included studies</li> </ul> | <p>Refer to the Appendix at the end of the document.</p> | <p>It is important to note that the collagen-binding corresponds to more than one assay depending on the collagen type: type 3 is generally used because type 4 is not very sensitive to multimers. Multimer testing is done after VWF:CB to capture abnormalities not captured by VWF:CB to allow for further characterization.</p> |
|------------------------------------------------------------------------------------------------------------------------------------------------|----------------------------------------------------------|--------------------------------------------------------------------------------------------------------------------------------------------------------------------------------------------------------------------------------------------------------------------------------------------------------------------------------------|

**Certainty of the evidence of test's effects**  
 What is the overall certainty of the evidence for any critical or important direct benefits, adverse effects or burden of the test?

| <b>JUDGEMENT</b>                                                                                                                               | <b>RESEARCH EVIDENCE</b>                                                                                                                                   | <b>ADDITIONAL CONSIDERATIONS</b> |
|------------------------------------------------------------------------------------------------------------------------------------------------|------------------------------------------------------------------------------------------------------------------------------------------------------------|----------------------------------|
| <ul style="list-style-type: none"> <li>○ Very low</li> <li>○ Low</li> <li>○ Moderate</li> <li>○ High</li> <li>● No included studies</li> </ul> | <p>Test's effects are not applicable since the intervention consists of a blood test that has no important direct benefits, adverse effects or burden.</p> |                                  |

**Certainty of the evidence of management's effects**  
 What is the overall certainty of the evidence of effects of the management that is guided by the test results?

| <b>JUDGEMENT</b>                                                                                                                               | <b>RESEARCH EVIDENCE</b>                                                                                                                                                                                                                                                                                                                                                                                                                                           | <b>ADDITIONAL CONSIDERATIONS</b> |
|------------------------------------------------------------------------------------------------------------------------------------------------|--------------------------------------------------------------------------------------------------------------------------------------------------------------------------------------------------------------------------------------------------------------------------------------------------------------------------------------------------------------------------------------------------------------------------------------------------------------------|----------------------------------|
| <ul style="list-style-type: none"> <li>○ Very low</li> <li>○ Low</li> <li>○ Moderate</li> <li>○ High</li> <li>● No included studies</li> </ul> | <p>While a clear-cut diagnosis is easy in severe von Willebrand factor reductions, the advantage of pursuing a definite diagnosis in mild or dubious cases should be weighed against the risk of over-medicalization. Identifying patients with VWD type 2 will help to give a treatment that will correct the dual defect of hemostasis caused by the abnormal/reduced von Willebrand factor and the concomitant deficiency of factor VIII. (Castaman, 2013).</p> |                                  |

**Certainty of the evidence of test result/management**  
 How certain is the link between test results and management decisions?

| <b>JUDGEMENT</b>                                                                                                                               | <b>RESEARCH EVIDENCE</b> | <b>ADDITIONAL CONSIDERATIONS</b>                                                                                                                                                                                                                      |
|------------------------------------------------------------------------------------------------------------------------------------------------|--------------------------|-------------------------------------------------------------------------------------------------------------------------------------------------------------------------------------------------------------------------------------------------------|
| <ul style="list-style-type: none"> <li>○ Very low</li> <li>○ Low</li> <li>○ Moderate</li> <li>○ High</li> <li>● No included studies</li> </ul> |                          | <p>The cut off between types 1 and 2 is mostly for classification purposes. It is not a critical factor when deciding on treatment. Desmopressin is more likely not to work for type 2 A and 2 M, and is relatively contraindicated for type 2 B.</p> |

|  |  |                                                                                               |
|--|--|-----------------------------------------------------------------------------------------------|
|  |  | However, if the choice of treatment is not Desmopressin, the labeling will not have an effect |
|--|--|-----------------------------------------------------------------------------------------------|

**Certainty of effects**  
What is the overall certainty of the evidence of effects of the test?

| JUDGEMENT                                                                                                                                      | RESEARCH EVIDENCE                                 | ADDITIONAL CONSIDERATIONS |
|------------------------------------------------------------------------------------------------------------------------------------------------|---------------------------------------------------|---------------------------|
| <ul style="list-style-type: none"> <li>● Very low</li> <li>○ Low</li> <li>○ Moderate</li> <li>○ High</li> <li>○ No included studies</li> </ul> | Refer to the Appendix at the end of the document. |                           |

**Values**  
Is there important uncertainty about or variability in how much people value the main outcomes?

| JUDGEMENT                                                                                                                                                                                                                                                        | RESEARCH EVIDENCE | ADDITIONAL CONSIDERATIONS                                                                                                                                                                                                                                                                                                                                                                                                                                                                                                                                                   |
|------------------------------------------------------------------------------------------------------------------------------------------------------------------------------------------------------------------------------------------------------------------|-------------------|-----------------------------------------------------------------------------------------------------------------------------------------------------------------------------------------------------------------------------------------------------------------------------------------------------------------------------------------------------------------------------------------------------------------------------------------------------------------------------------------------------------------------------------------------------------------------------|
| <ul style="list-style-type: none"> <li>○ Important uncertainty or variability</li> <li>● Possibly important uncertainty or variability</li> <li>○ Probably no important uncertainty or variability</li> <li>○ No important uncertainty or variability</li> </ul> |                   | Patients are very familiar with having blood drawn for lab testing for any reason. Well-trained phlebotomists at blood disorder treatment centers are efficient and often have a good technique, which means little or no bruising from blood draws for specialized hematology laboratory tests. Patients care to have assays that can be trusted that will lead to an accurate diagnosis, and don't have to be repeated on multiple occasions. So, patient concerns or preferences that are specific to these specialized labs are not different than other blood testing. |

**Balance of effects**  
Does the balance between desirable and undesirable effects favor the intervention or the comparison?

| JUDGEMENT | RESEARCH EVIDENCE | ADDITIONAL CONSIDERATIONS |
|-----------|-------------------|---------------------------|
|-----------|-------------------|---------------------------|

|                                                                                                                                                                                                                                                                                                                |                                                          |  |
|----------------------------------------------------------------------------------------------------------------------------------------------------------------------------------------------------------------------------------------------------------------------------------------------------------------|----------------------------------------------------------|--|
| <ul style="list-style-type: none"> <li>○ Favors the comparison</li> <li>○ Probably favors the comparison</li> <li>● Does not favor either the intervention or the comparison</li> <li>○ Probably favors the intervention</li> <li>○ Favors the intervention</li> <li>○ Varies</li> <li>○ Don't know</li> </ul> | <p>Refer to the Appendix at the end of the document.</p> |  |
|----------------------------------------------------------------------------------------------------------------------------------------------------------------------------------------------------------------------------------------------------------------------------------------------------------------|----------------------------------------------------------|--|

**Resources required**  
How large are the resource requirements (costs)?

| JUDGEMENT                                                                                                                                                                                                                      | RESEARCH EVIDENCE                                                                                                                                                                                                                                                                                                                                                                                                                                                                                                                                                                                                                                                                                                                                                                                              | ADDITIONAL CONSIDERATIONS |        |                   |            |       |         |               |    |     |                  |        |     |                    |       |     |               |      |     |           |         |    |  |
|--------------------------------------------------------------------------------------------------------------------------------------------------------------------------------------------------------------------------------|----------------------------------------------------------------------------------------------------------------------------------------------------------------------------------------------------------------------------------------------------------------------------------------------------------------------------------------------------------------------------------------------------------------------------------------------------------------------------------------------------------------------------------------------------------------------------------------------------------------------------------------------------------------------------------------------------------------------------------------------------------------------------------------------------------------|---------------------------|--------|-------------------|------------|-------|---------|---------------|----|-----|------------------|--------|-----|--------------------|-------|-----|---------------|------|-----|-----------|---------|----|--|
| <ul style="list-style-type: none"> <li>○ Large costs</li> <li>● Moderate costs</li> <li>○ Negligible costs and savings</li> <li>○ Moderate savings</li> <li>○ Large savings</li> <li>○ Varies</li> <li>○ Don't know</li> </ul> | <table border="1" data-bbox="531 673 1167 980"> <thead> <tr> <th></th> <th>VWF:CB</th> <th>Multimer analysis</th> </tr> </thead> <tbody> <tr> <td><b>USA</b></td> <td>\$ 30</td> <td>200-300</td> </tr> <tr> <td><b>Canada</b></td> <td>\$</td> <td>100</td> </tr> <tr> <td><b>Australia</b></td> <td>\$ 150</td> <td>500</td> </tr> <tr> <td><b>New Zealand</b></td> <td>\$ 30</td> <td>180</td> </tr> <tr> <td><b>Europe</b></td> <td>€ 50</td> <td>200</td> </tr> <tr> <td><b>UK</b></td> <td>£ 15-20</td> <td>30</td> </tr> </tbody> </table> <p data-bbox="531 1024 1409 1125">There is considerable variability in cost among different jurisdictions. Cost is also affected by different factors including insurance plans. The estimate provided are based on the clinical experts best estimates.</p> |                           | VWF:CB | Multimer analysis | <b>USA</b> | \$ 30 | 200-300 | <b>Canada</b> | \$ | 100 | <b>Australia</b> | \$ 150 | 500 | <b>New Zealand</b> | \$ 30 | 180 | <b>Europe</b> | € 50 | 200 | <b>UK</b> | £ 15-20 | 30 |  |
|                                                                                                                                                                                                                                | VWF:CB                                                                                                                                                                                                                                                                                                                                                                                                                                                                                                                                                                                                                                                                                                                                                                                                         | Multimer analysis         |        |                   |            |       |         |               |    |     |                  |        |     |                    |       |     |               |      |     |           |         |    |  |
| <b>USA</b>                                                                                                                                                                                                                     | \$ 30                                                                                                                                                                                                                                                                                                                                                                                                                                                                                                                                                                                                                                                                                                                                                                                                          | 200-300                   |        |                   |            |       |         |               |    |     |                  |        |     |                    |       |     |               |      |     |           |         |    |  |
| <b>Canada</b>                                                                                                                                                                                                                  | \$                                                                                                                                                                                                                                                                                                                                                                                                                                                                                                                                                                                                                                                                                                                                                                                                             | 100                       |        |                   |            |       |         |               |    |     |                  |        |     |                    |       |     |               |      |     |           |         |    |  |
| <b>Australia</b>                                                                                                                                                                                                               | \$ 150                                                                                                                                                                                                                                                                                                                                                                                                                                                                                                                                                                                                                                                                                                                                                                                                         | 500                       |        |                   |            |       |         |               |    |     |                  |        |     |                    |       |     |               |      |     |           |         |    |  |
| <b>New Zealand</b>                                                                                                                                                                                                             | \$ 30                                                                                                                                                                                                                                                                                                                                                                                                                                                                                                                                                                                                                                                                                                                                                                                                          | 180                       |        |                   |            |       |         |               |    |     |                  |        |     |                    |       |     |               |      |     |           |         |    |  |
| <b>Europe</b>                                                                                                                                                                                                                  | € 50                                                                                                                                                                                                                                                                                                                                                                                                                                                                                                                                                                                                                                                                                                                                                                                                           | 200                       |        |                   |            |       |         |               |    |     |                  |        |     |                    |       |     |               |      |     |           |         |    |  |
| <b>UK</b>                                                                                                                                                                                                                      | £ 15-20                                                                                                                                                                                                                                                                                                                                                                                                                                                                                                                                                                                                                                                                                                                                                                                                        | 30                        |        |                   |            |       |         |               |    |     |                  |        |     |                    |       |     |               |      |     |           |         |    |  |

**Certainty of evidence of required resources**  
What is the certainty of the evidence of resource requirements (costs)?

| JUDGEMENT | RESEARCH EVIDENCE | ADDITIONAL CONSIDERATIONS |
|-----------|-------------------|---------------------------|
|-----------|-------------------|---------------------------|



|                                                                                                                                                |                                                                                                                                                                                                                                                                                                                                                                                                                                                            |  |
|------------------------------------------------------------------------------------------------------------------------------------------------|------------------------------------------------------------------------------------------------------------------------------------------------------------------------------------------------------------------------------------------------------------------------------------------------------------------------------------------------------------------------------------------------------------------------------------------------------------|--|
| <ul style="list-style-type: none"> <li>○ Very low</li> <li>○ Low</li> <li>○ Moderate</li> <li>○ High</li> <li>● No included studies</li> </ul> | <p>The cost and difficulty of good quality control of these tests make these exams less accessible. There is difficulty in running multiple assays due to cost considerations, and reimbursement being only available for a limited number of tests in an individual patient. Physicians should choose the assays that have basic requirements and then identify those that could be of use in settings where the resource is not so much of an issue.</p> |  |
|------------------------------------------------------------------------------------------------------------------------------------------------|------------------------------------------------------------------------------------------------------------------------------------------------------------------------------------------------------------------------------------------------------------------------------------------------------------------------------------------------------------------------------------------------------------------------------------------------------------|--|

**Cost effectiveness**  
Does the cost-effectiveness of the intervention favor the intervention or the comparison?

| <b>JUDGEMENT</b>                                                                                                                                                                                                                                                                                                        | <b>RESEARCH EVIDENCE</b> | <b>ADDITIONAL CONSIDERATIONS</b> |
|-------------------------------------------------------------------------------------------------------------------------------------------------------------------------------------------------------------------------------------------------------------------------------------------------------------------------|--------------------------|----------------------------------|
| <ul style="list-style-type: none"> <li>○ Favors the comparison</li> <li>○ Probably favors the comparison</li> <li>○ Does not favor either the intervention or the comparison</li> <li>○ Probably favors the intervention</li> <li>○ Favors the intervention</li> <li>○ Varies</li> <li>● No included studies</li> </ul> |                          |                                  |

**Equity**  
What would be the impact on health equity?

| <b>JUDGEMENT</b>                                                                                                                                                                                                 | <b>RESEARCH EVIDENCE</b> | <b>ADDITIONAL CONSIDERATIONS</b>                                                                                                                                                                                                                                                                                                                                   |
|------------------------------------------------------------------------------------------------------------------------------------------------------------------------------------------------------------------|--------------------------|--------------------------------------------------------------------------------------------------------------------------------------------------------------------------------------------------------------------------------------------------------------------------------------------------------------------------------------------------------------------|
| <ul style="list-style-type: none"> <li>○ Reduced</li> <li>○ Probably reduced</li> <li>● Probably no impact</li> <li>○ Probably increased</li> <li>○ Increased</li> <li>○ Varies</li> <li>○ Don't know</li> </ul> |                          | <p>Insurance coverage for VWF:CB/Ag and multimer testing tests are variable based on location and funding model. In fact, in the United States of America, most private insurance will cover these assays, but some people have a large deductible. Sometimes the reimbursed value does not cover the overall cost of the test, especially in public services.</p> |

|  |  |                                                                                                                                                                                                                                                                                                                                                                                                                                                                                                                                                                                                                                |
|--|--|--------------------------------------------------------------------------------------------------------------------------------------------------------------------------------------------------------------------------------------------------------------------------------------------------------------------------------------------------------------------------------------------------------------------------------------------------------------------------------------------------------------------------------------------------------------------------------------------------------------------------------|
|  |  | <p>In New Zealand specifically, all residents get blood tests for free. This is also applicable in the United Kingdom, since there is no practical restriction on requesting these tests. In Italy, the Netherlands, Canada, and Australia, they are covered by insurance.</p> <p>People with access problems and people with no health insurance are disadvantaged, specifically in regards to the multimer analysis testing. In fact, if insurance does not cover one test, but covers another and the latter is still a good option (even if not the best), the patient tends to go with the more cost-effective assay.</p> |
|--|--|--------------------------------------------------------------------------------------------------------------------------------------------------------------------------------------------------------------------------------------------------------------------------------------------------------------------------------------------------------------------------------------------------------------------------------------------------------------------------------------------------------------------------------------------------------------------------------------------------------------------------------|

**Acceptability**  
Is the intervention acceptable to key stakeholders?

| JUDGEMENT                                                                                                                                                                                                       | RESEARCH EVIDENCE | ADDITIONAL CONSIDERATIONS                               |
|-----------------------------------------------------------------------------------------------------------------------------------------------------------------------------------------------------------------|-------------------|---------------------------------------------------------|
| <input type="radio"/> No<br><input type="radio"/> Probably no<br><input type="radio"/> Probably yes<br><input checked="" type="radio"/> Yes<br><input type="radio"/> Varies<br><input type="radio"/> Don't know |                   | Generally, patients accept the blood tests in question. |

**Feasibility**  
Is the intervention feasible to implement?

| JUDGEMENT                                                                                                                                                                                                       | RESEARCH EVIDENCE                                                                                                                                                                                                                                                                                                                                                                                                                                                                                                                                                                                                                               | ADDITIONAL CONSIDERATIONS                                                                                                                                                                                                                                                                                                                                                                                                                                                          |
|-----------------------------------------------------------------------------------------------------------------------------------------------------------------------------------------------------------------|-------------------------------------------------------------------------------------------------------------------------------------------------------------------------------------------------------------------------------------------------------------------------------------------------------------------------------------------------------------------------------------------------------------------------------------------------------------------------------------------------------------------------------------------------------------------------------------------------------------------------------------------------|------------------------------------------------------------------------------------------------------------------------------------------------------------------------------------------------------------------------------------------------------------------------------------------------------------------------------------------------------------------------------------------------------------------------------------------------------------------------------------|
| <input type="radio"/> No<br><input type="radio"/> Probably no<br><input checked="" type="radio"/> Probably yes<br><input type="radio"/> Yes<br><input type="radio"/> Varies<br><input type="radio"/> Don't know | <p>Classic multimer analysis is labor-intensive, time-consuming and requires expertise for interpretation (Luchtman-Jones, 2019).</p> <p>Overall, VWF:CB/Ag is more widely available than multimer analysis and of more practical use. National or international reference centers that coordinate quality assurance exercises are required. However, it is difficult to recommend one over the other as labs will have different assays and expertise available to them. In fact, there is some practical value in pursuing a detailed characterization of the disease but it is possible to manage patients reasonably well without that.</p> | <p>VWF:CB/Ag is generally available in research-active departments and specialized centers. Multimer analysis is a very cumbersome test for the lab to perform and takes multiple days to complete, thus some labs try to use VWF:CB/Ag to replace the need for multimer analysis. It is not a widely available test in all hospitals and is usually sent out to specialized centers. For instance, it is available in a single national center in Australia, and expertise is</p> |

|  |  |                                                                                                                                                    |
|--|--|----------------------------------------------------------------------------------------------------------------------------------------------------|
|  |  | waning due to lack of referrals. The extent of training of personnel to perform the test is at the discretion of the clinical laboratory director. |
|--|--|----------------------------------------------------------------------------------------------------------------------------------------------------|

**SUMMARY OF JUDGEMENTS**

|                                                     | JUDGEMENT                            |                                               |                                                  |                                         |                         |        |                     |
|-----------------------------------------------------|--------------------------------------|-----------------------------------------------|--------------------------------------------------|-----------------------------------------|-------------------------|--------|---------------------|
| PROBLEM                                             | No                                   | Probably no                                   | Probably yes                                     | Yes                                     |                         | Varies | Don't know          |
| TEST ACCURACY                                       | Very inaccurate                      | Inaccurate                                    | Accurate                                         | Very accurate                           |                         | Varies | Don't know          |
| DESIRABLE EFFECTS                                   | Trivial                              | Small                                         | Moderate                                         | Large                                   |                         | Varies | Don't know          |
| UNDESIRABLE EFFECTS                                 | Large                                | Moderate                                      | Small                                            | Trivial                                 |                         | Varies | Don't know          |
| CERTAINTY OF THE EVIDENCE OF TEST ACCURACY          | Very low                             | Low                                           | Moderate                                         | High                                    |                         |        | No included studies |
| CERTAINTY OF THE EVIDENCE OF TEST'S EFFECTS         | Very low                             | Low                                           | Moderate                                         | High                                    |                         |        | No included studies |
| CERTAINTY OF THE EVIDENCE OF MANAGEMENT'S EFFECTS   | Very low                             | Low                                           | Moderate                                         | High                                    |                         |        | No included studies |
| CERTAINTY OF THE EVIDENCE OF TEST RESULT/MANAGEMENT | Very low                             | Low                                           | Moderate                                         | High                                    |                         |        | No included studies |
| CERTAINTY OF EFFECTS                                | Very low                             | Low                                           | Moderate                                         | High                                    |                         |        | No included studies |
| VALUES                                              | Important uncertainty or variability | Possibly important uncertainty or variability | Probably no important uncertainty or variability | No important uncertainty or variability |                         |        |                     |
| BALANCE OF EFFECTS                                  | Favors the comparison                | Probably favors the comparison                | Does not favor either the                        | Probably favors the intervention        | Favors the intervention | Varies | Don't know          |

|                                             | JUDGEMENT             |                                |                                                          |                                  |                         |        |                            |
|---------------------------------------------|-----------------------|--------------------------------|----------------------------------------------------------|----------------------------------|-------------------------|--------|----------------------------|
|                                             |                       |                                | intervention or the comparison                           |                                  |                         |        |                            |
| RESOURCES REQUIRED                          | Large costs           | <b>Moderate costs</b>          | Negligible costs and savings                             | Moderate savings                 | Large savings           | Varies | Don't know                 |
| CERTAINTY OF EVIDENCE OF REQUIRED RESOURCES | Very low              | Low                            | Moderate                                                 | High                             |                         |        | <b>No included studies</b> |
| COST EFFECTIVENESS                          | Favors the comparison | Probably favors the comparison | Does not favor either the intervention or the comparison | Probably favors the intervention | Favors the intervention | Varies | <b>No included studies</b> |
| EQUITY                                      | Reduced               | Probably reduced               | <b>Probably no impact</b>                                | Probably increased               | Increased               | Varies | Don't know                 |
| ACCEPTABILITY                               | No                    | Probably no                    | Probably yes                                             | <b>Yes</b>                       |                         | Varies | Don't know                 |
| FEASIBILITY                                 | No                    | Probably no                    | <b>Probably yes</b>                                      | Yes                              |                         | Varies | Don't know                 |

#### TYPE OF RECOMMENDATION

|                                                     |                                                          |                                                                                      |                                                      |                                                 |
|-----------------------------------------------------|----------------------------------------------------------|--------------------------------------------------------------------------------------|------------------------------------------------------|-------------------------------------------------|
| Strong recommendation against the intervention<br>○ | Conditional recommendation against the intervention<br>○ | <b>Conditional recommendation for either the intervention or the comparison</b><br>● | Conditional recommendation for the intervention<br>○ | Strong recommendation for the intervention<br>○ |
|-----------------------------------------------------|----------------------------------------------------------|--------------------------------------------------------------------------------------|------------------------------------------------------|-------------------------------------------------|

#### CONCLUSIONS

##### Recommendation

The panel suggests using either VWF multimer analysis or VWF:CB/VWF:Ag (ratio of VWF collagen binding to antigen) to diagnose Type 2 VWD in patients suspected of Type 2A, 2B or 2M VWD in need of additional testing.  
(Conditional recommendation based on low certainty in the evidence)

Remarks:

- Different vascular collagens interact with VWF; Types I and III interact with the A3 domain and Type IV and VI interact with the A1 domain. Although not widely available, if labs perform a VWF:CB assay, they will most often use Type I and/or III Collagen. Binding to Types I or III is known to be a surrogate for the presence of high molecular weight VWF.
- Type 2M VWD is defined by a normal VWF multimer profile, including the presence of high molecular weight VWF.

### Justification

The guideline panel determined that there is low certainty in the evidence for neither a health benefit nor a harm from using multimer analysis over VWF:CB in patients with type 2 VWD in need for additional testing for classification. Other EtD criteria were generally not favor of using either assays for classification so that the desirable consequences were equal to the undesirable consequences.

### Subgroup considerations

### Implementation considerations

### Monitoring and evaluation

### Research priorities

- Diagnostic test accuracy for doing multimers in VWD patients that already had abnormal collagen binding.

## APPENDIX

### 1. Risk of bias:

| Author                | Risk of bias population selection | Risk of bias index test | Risk of bias reference test | Flow and timing Rsk of bias |
|-----------------------|-----------------------------------|-------------------------|-----------------------------|-----------------------------|
| Perez-Rodriguez, 2018 | Moderate                          | Low                     | Low                         | Low                         |
| Vangenechten, 2018    | High                              | Low                     | Low                         | Low                         |
| Jousselme, 2018       | High                              | Low                     | Low                         | Low                         |
| Bowyer, 2018          | High                              | Low                     | Low                         | Low                         |
| Casonato, 2017        | Low                               | Moderate                | Low                         | Low                         |
| Ni, 2013              | Low                               | Low                     | Low                         | Low                         |
| Flood, 2013           | High                              | Low                     | Moderate                    | Low                         |
| Popov, 2006           | Low                               | Low                     | Low                         | Low                         |
| Adcock, 2006          | Low                               | Low                     | Low                         | Low                         |
| Riddell, 2002         | High                              | Low                     | High                        | Low                         |
| Federici, 2000        | High                              | Moderate                | Low                         | Low                         |

## 2. Outcomes:

### ➤ Diagnostic test accuracy VWD type 2A 2B:

| Author, Year          | Study Design                  | PICO arm      | TP  | FN | FP  | TN   | Sens  | Low CI | Up CI | Spec  | Low CI | Up CI | Comments       |
|-----------------------|-------------------------------|---------------|-----|----|-----|------|-------|--------|-------|-------|--------|-------|----------------|
| Ni, 2013              | Cross sectional, Cohort       | VWF:CB/VWF:Ag | 47  | 2  | 7   | 45   | 0.959 | 0.851  | 0.99  | 0.865 | 0.744  | 0.934 | at 0.5 cutoff  |
| Popov, 2006           | Cross sectional, Cohort       | Multimer      | 36  | 0  | 135 | 2715 | 0.986 | 0.818  | 0.999 | 0.952 | 0.944  | 0.96  |                |
|                       |                               | VWF:CB/VWF:Ag | 30  | 6  | 16  | 75   | 0.833 | 0.675  | 0.923 | 0.824 | 0.732  | 0.889 | at 0.5 cut off |
| Adcock, 2006          | Cross sectional, Cohort       | VWF:CB/VWF:Ag | 47  | 0  | 21  | 428  | 0.99  | 0.854  | 0.999 | 0.952 | 0.928  | 0.968 | at 0.5 cut off |
| Perez-Rodriguez, 2018 | Cross sectional, Case Control | VWF:CB/VWF:Ag | 127 | 19 | 0   | 30   | 0.874 | 0.809  | 0.916 | 0.984 | 0.789  | 0.999 | at 0.7 cutoff  |
|                       |                               | Multimer      | 132 | 14 | 0   | 30   | 0.904 | 0.836  | 0.938 | 0.984 | 0.789  | 0.999 |                |
| Vangenechten, 2018    | Cross sectional, Case Control | VWF:CB/VWF:Ag | 31  | 19 | 3   | 84   | 0.62  | 0.48   | 0.743 | 0.966 | 0.898  | 0.989 | at 0.6 cut off |
| Jousselman, 2018      | Cross sectional, Case Control | VWF:CB/VWF:Ag | 17  | 22 | 0   | 21   | 0.437 | 0.294  | 0.592 | 0.977 | 0.723  | 0.999 | at 0.6 cut of  |
| Bowyer, 2018          | Cross sectional, Case Control | Multimer      | 48  | 5  | 4   | 51   | 0.906 | 0.793  | 0.96  | 0.927 | 0.822  | 0.972 |                |
| Flood, 2013           | Cross sectional, Case Control | Multimer      | 51  | 2  | 2   | 144  | 0.962 | 0.861  | 0.991 | 0.986 | 0.947  | 0.997 |                |
|                       |                               | VWF:CB/VWF:Ag | 44  | 9  | 1   | 145  | 0.83  | 0.705  | 0.909 | 0.993 | 0.953  | 0.999 | at 0.7 cutoff  |
| Riddell, 2002         | Cross sectional, Case Control | VWF:CB/VWF:Ag | 7   | 0  | 0   | 22   | 0.937 | 0.461  | 0.996 | 0.978 | 0.732  | 0.999 | at 0.7 cutoff  |
| Federici, 2000        | Cross sectional, Case Control | VWF:CB/VWF:Ag | 39  | 5  | 2   | 48   | 0.886 | 0.755  | 0.952 | 0.96  | 0.854  | 0.99  | at 0.7 cutoff  |

### ○ VWF:CB/Ag vs multimer:

| VWF multimer analysis |                             | VWF:CB/Ag   |                             |
|-----------------------|-----------------------------|-------------|-----------------------------|
| Sensitivity           | 0.90 (95% CI: 0.90 to 0.99) | Sensitivity | 0.90 (95% CI: 0.78 to 0.96) |
| Specificity           | 0.97 (95% CI: 0.94 to 0.99) | Specificity | 0.95 (95% CI: 0.89 to 0.98) |

Prevalences 80%<sup>c</sup>

| Outcome                                                                                            | No of studies (No of patients) | Study design                       | Factors that may decrease certainty of evidence |              |               |                      |                  | Effect per 1,000 patients tested |                  | Test accuracy CoE |
|----------------------------------------------------------------------------------------------------|--------------------------------|------------------------------------|-------------------------------------------------|--------------|---------------|----------------------|------------------|----------------------------------|------------------|-------------------|
|                                                                                                    |                                |                                    | Risk of bias                                    | Indirectness | Inconsistency | Imprecision          | Publication bias | pre-test probability of 80%      |                  |                   |
|                                                                                                    |                                |                                    |                                                 |              |               |                      |                  | VWF multimer analysis            | VWF:CB/Ag        |                   |
| <b>True positives</b><br>(patients with patients with VWD type 2)                                  | 9 studies<br>476 patients      | cohort & case-control type studies | very serious <sup>a</sup>                       | not serious  | not serious   | serious <sup>b</sup> | none             | 720 (720 to 792)                 | 720 (624 to 768) | ⊕○○○<br>VERY LOW  |
| <b>0 fewer TP in VWF multimer analysis</b>                                                         |                                |                                    |                                                 |              |               |                      |                  |                                  |                  |                   |
| 80 (8 to 80)                                                                                       |                                |                                    |                                                 |              |               |                      |                  | 80 (32 to 176)                   |                  |                   |
| <b>0 fewer FN in VWF multimer analysis</b>                                                         |                                |                                    |                                                 |              |               |                      |                  |                                  |                  |                   |
| <b>False negatives</b><br>(patients incorrectly classified as not having patients with VWD type 2) | 9 studies<br>948 patients      | cohort & case-control type studies | very serious <sup>a</sup>                       | not serious  | not serious   | serious <sup>b</sup> | none             | 194 (188 to 198)                 | 190 (178 to 196) | ⊕○○○<br>VERY LOW  |
| <b>4 more TN in VWF multimer analysis</b>                                                          |                                |                                    |                                                 |              |               |                      |                  |                                  |                  |                   |
| 6 (2 to 12)                                                                                        |                                |                                    |                                                 |              |               |                      |                  | 10 (4 to 22)                     |                  |                   |
| <b>4 fewer FP in VWF multimer analysis</b>                                                         |                                |                                    |                                                 |              |               |                      |                  |                                  |                  |                   |
| <b>True negatives</b><br>(patients without patients with VWD type 2)                               | 9 studies<br>948 patients      | cohort & case-control type studies | very serious <sup>a</sup>                       | not serious  | not serious   | serious <sup>b</sup> | none             | 194 (188 to 198)                 | 190 (178 to 196) | ⊕○○○<br>VERY LOW  |
| <b>4 more TN in VWF multimer analysis</b>                                                          |                                |                                    |                                                 |              |               |                      |                  |                                  |                  |                   |
| 6 (2 to 12)                                                                                        |                                |                                    |                                                 |              |               |                      |                  | 10 (4 to 22)                     |                  |                   |
| <b>4 fewer FP in VWF multimer analysis</b>                                                         |                                |                                    |                                                 |              |               |                      |                  |                                  |                  |                   |
| <b>False positives</b><br>(patients incorrectly classified as having patients with VWD type 2)     | 9 studies<br>948 patients      | cohort & case-control type studies | very serious <sup>a</sup>                       | not serious  | not serious   | serious <sup>b</sup> | none             | 194 (188 to 198)                 | 190 (178 to 196) | ⊕○○○<br>VERY LOW  |
| <b>4 more TN in VWF multimer analysis</b>                                                          |                                |                                    |                                                 |              |               |                      |                  |                                  |                  |                   |
| 6 (2 to 12)                                                                                        |                                |                                    |                                                 |              |               |                      |                  | 10 (4 to 22)                     |                  |                   |
| <b>4 fewer FP in VWF multimer analysis</b>                                                         |                                |                                    |                                                 |              |               |                      |                  |                                  |                  |                   |

### Explanations

- a. Case-control design makes patient selection bias serious. Different cut-offs were used in the VWF:CB/Ag ratios (0.5 in Popov versus 0.7 in Flood)
- b. A different clinical decision would be considered if the upper versus lower boundary of the pooled effect estimate was used
- c. Typically seen in patients with VWD type 2 in need for additional testing for subtype classification.

### ○ VWF:CB/Ag:

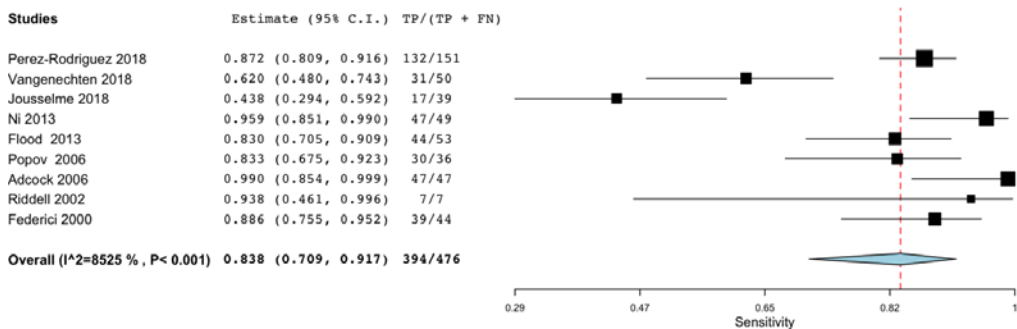



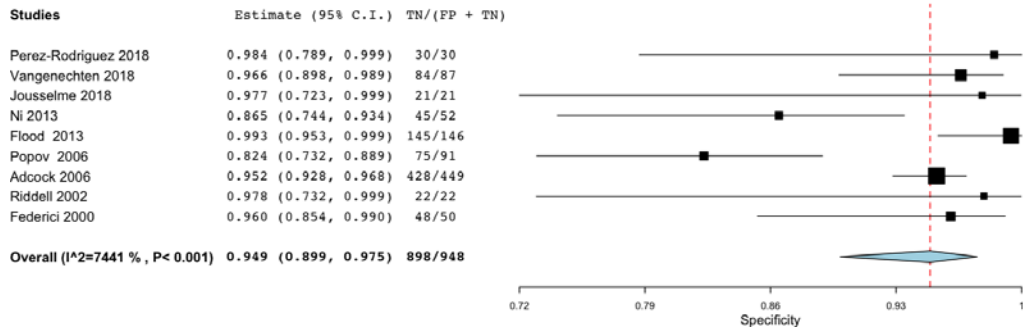

**Question:** Should VWF:CB be used to diagnose VWD type 2A and 2B in Patients suspected of VWD type 2?

|             |                             |
|-------------|-----------------------------|
| Sensitivity | 0.90 (95% CI: 0.78 to 0.96) |
| Specificity | 0.95 (95% CI: 0.89 to 0.98) |

Prevalences 80%<sup>c</sup>

| Outcome                                                                                      | No of studies (No of patients) | Study design                       | Factors that may decrease certainty of evidence |              |                      |             |                  | Effect per 1,000 patients tested | Test accuracy CoE |
|----------------------------------------------------------------------------------------------|--------------------------------|------------------------------------|-------------------------------------------------|--------------|----------------------|-------------|------------------|----------------------------------|-------------------|
|                                                                                              |                                |                                    | Risk of bias                                    | Indirectness | Inconsistency        | Imprecision | Publication bias | pre-test probability of 80%      |                   |
| <b>True positives</b><br>(patients with VWD type 2A and 2B)                                  | 9 studies<br>476 patients      | cohort & case-control type studies | serious <sup>a</sup>                            | not serious  | serious <sup>b</sup> | not serious | none             | 670 (567 to 734)                 | ⊕⊕○○<br>LOW       |
| <b>False negatives</b><br>(patients incorrectly classified as not having VWD type 2A and 2B) |                                |                                    |                                                 |              |                      |             |                  | 130 (66 to 233)                  |                   |
| <b>True negatives</b><br>(patients without VWD type 2A and 2B)                               | 9 studies<br>948 patients      | cohort & case-control type studies | serious <sup>a</sup>                            | not serious  | serious <sup>b</sup> | not serious | none             | 190 (180 to 195)                 | ⊕⊕○○<br>LOW       |
| <b>False positives</b><br>(patients incorrectly classified as having VWD type 2A and 2B)     |                                |                                    |                                                 |              |                      |             |                  | 10 (5 to 20)                     |                   |

**Explanations**

- a. Case-control design makes patient selection bias serious
- b. The confidence intervals of the single effect estimates do not overall with other effect estimates
- c. Typically seen in patients with VWD type 2 in need for additional testing for subtype classification.

○ **Multimer Analysis:**

| Studies                                        | Sensitivity                 | Ev/Trt         |
|------------------------------------------------|-----------------------------|----------------|
| Perez-Rodriguez 2018                           | 0.901 (0.851, 0.950)        | 127/141        |
| Bowyer 2018                                    | 0.906 (0.827, 0.984)        | 48/53          |
| Flood 2013                                     | 0.962 (0.911, 1.000)        | 51/53          |
| Popov 2006                                     | 0.986 (0.949, 1.000)        | 36/36          |
| <b>Overall (I<sup>2</sup>=6642 %, P=0.030)</b> | <b>0.944 (0.899, 0.988)</b> | <b>262/283</b> |

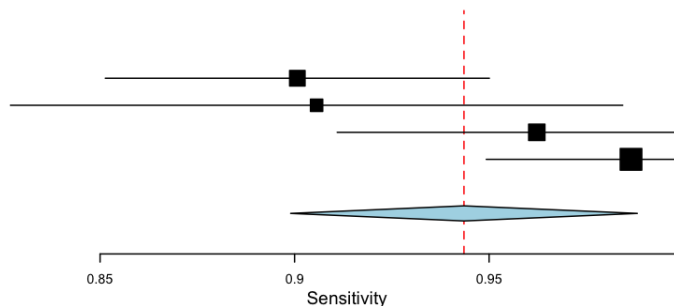

| Studies                                        | Specificity                 | Ev/Trt           |
|------------------------------------------------|-----------------------------|------------------|
| Perez-Rodriguez 2018                           | 0.984 (0.940, 1.000)        | 30/30            |
| Bowyer 2018                                    | 0.927 (0.859, 0.996)        | 51/55            |
| Flood 2013                                     | 0.986 (0.967, 1.000)        | 144/146          |
| Popov 2006                                     | 0.953 (0.945, 0.960)        | 2715/2850        |
| <b>Overall (I<sup>2</sup>=7610 %, P=0.006)</b> | <b>0.967 (0.941, 0.992)</b> | <b>2940/3081</b> |

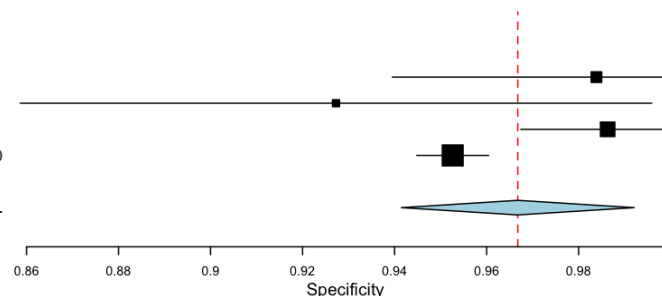

|                          |                             |
|--------------------------|-----------------------------|
| Sensitivity <sup>c</sup> | 0.90 (95% CI: 0.90 to 0.99) |
| Specificity <sup>c</sup> | 0.97 (95% CI: 0.94 to 0.99) |

Prevalences 80%<sup>b</sup>

| Outcome                                                                                      | № of studies (№ of patients) | Study design                       | Factors that may decrease certainty of evidence |              |               |             |                  | Effect per 1,000 patients tested | Test accuracy CoE |
|----------------------------------------------------------------------------------------------|------------------------------|------------------------------------|-------------------------------------------------|--------------|---------------|-------------|------------------|----------------------------------|-------------------|
|                                                                                              |                              |                                    | Risk of bias                                    | Indirectness | Inconsistency | Imprecision | Publication bias | pre-test probability of 80%      |                   |
| <b>True positives</b><br>(patients with VWD type 2A and 2B)                                  | 4 studies<br>283 patients    | cohort & case-control type studies | serious <sup>a</sup>                            | not serious  | not serious   | not serious | none             | 721 (719 to 790)                 | ⊕⊕⊕○<br>MODERATE  |
| <b>False negatives</b><br>(patients incorrectly classified as not having VWD type 2A and 2B) |                              |                                    |                                                 |              |               |             |                  | 79 (10 to 81)                    |                   |
| <b>True negatives</b><br>(patients without VWD type 2A and 2B)                               | 4 studies<br>3081 patients   | cohort & case-control type studies | serious <sup>a</sup>                            | not serious  | not serious   | not serious | none             | 193 (188 to 198)                 | ⊕⊕⊕○<br>MODERATE  |
| <b>False positives</b><br>(patients incorrectly classified as having VWD type 2A and 2B)     |                              |                                    |                                                 |              |               |             |                  | 7 (2 to 12)                      |                   |

### Explanations

- a. Case-control design makes patient selection bias serious
- b. Typically seen in patients with VWD type 2 in need for additional testing for subtype classification.

c. Pooled in proportion since the number of studies does not allow for diagnostic test accuracy pooling.

➤ *Diagnostic test accuracy VWD type 2M:*

| Author, Year          | Study Design                  | PICO arm      | TP | FN | FP  | TN   | Sens  | Low CI | Up CI | Spec  | Low CI | Up CI | Comments      |
|-----------------------|-------------------------------|---------------|----|----|-----|------|-------|--------|-------|-------|--------|-------|---------------|
| Popov, 2006           | Cross sectional, Cohort       | Multimer      | 12 | 0  | 135 | 2715 | 0.962 | 0.597  | 0.998 | 0.952 | 0.944  | 0.96  |               |
| Perez-Rodriguez, 2018 | Cross sectional, Case Control | VWF:CB/VWF:Ag | 26 | 13 | 0   | 30   | 0.667 | 0.829  | 0.999 | 0.984 | 0.789  | 0.999 | At 0.7 cutoff |
|                       |                               | Multimer      | 39 | 0  | 0   | 30   | 0.663 | 0.999  | 0.791 | 0.984 | 0.789  | 0.999 |               |
| Jousselmane, 2018     | Cross sectional, Case Control | VWF:CB/VWF:Ag | 7  | 0  | 0   | 21   | 0.937 | 0.461  | 0.996 | 0.977 | 0.723  | 0.999 | at 0.6 cutoff |
| Bowyer, 2018          | Cross sectional, Case Control | Multimer      | 28 | 6  | 4   | 51   | 0.824 | 0.659  | 0.919 | 0.927 | 0.822  | 0.972 |               |
| Flood, 2013           | Cross sectional, Case Control | Multimer      | 17 | 1  | 2   | 144  | 0.944 | 0.693  | 0.992 | 0.986 | 0.947  | 0.997 |               |
|                       |                               | VWF:CB/VWF:Ag | 18 | 0  | 1   | 145  | 0.974 | 0.69   | 0.998 | 0.99  | 0.951  | 0.998 | at 0.7 cutoff |
| Riddell, 2002         | Cross sectional, Case Control | VWF:CB/VWF:Ag | 25 | 0  | 0   | 22   | 0.981 | 0.756  | 0.999 | 0.978 | 0.732  | 0.999 | at 0.7 cutoff |

○ *VWF:CB/Ag vs Multimer analysis:*

| multimer analysis |                             | VWF:CB      |                             |
|-------------------|-----------------------------|-------------|-----------------------------|
| Sensitivity       | 0.86 (95% CI: 0.73 to 0.98) | Sensitivity | 0.98 (95% CI: 0.96 to 1.00) |
| Specificity       | 0.97 (95% CI: 0.94 to 0.99) | Specificity | 0.99 (95% CI: 0.98 to 1.00) |

Prevalences 80%<sup>c</sup>

| Outcome                                                                               | No of studies (No of patients) | Study design                       | Factors that may decrease certainty of evidence |              |               |                      |                  | Effect per 1,000 patients tested |                  | Test accuracy CoE |
|---------------------------------------------------------------------------------------|--------------------------------|------------------------------------|-------------------------------------------------|--------------|---------------|----------------------|------------------|----------------------------------|------------------|-------------------|
|                                                                                       |                                |                                    | Risk of bias                                    | Indirectness | Inconsistency | Imprecision          | Publication bias | pre-test probability of 80%      |                  |                   |
|                                                                                       |                                |                                    |                                                 |              |               |                      |                  | multimer analysis                | VWF:CB           |                   |
| <b>True positives</b><br>(patients with VWD type 2M)                                  | 4 studies<br>103 patients      | cohort & case-control type studies | very serious <sup>a</sup>                       | not serious  | not serious   | serious <sup>b</sup> | none             | 686 (588 to 784)                 | 786 (765 to 800) | ⊕○○○<br>VERY LOW  |
| <b>100 fewer TP in multimer analysis</b>                                              |                                |                                    |                                                 |              |               |                      |                  |                                  |                  |                   |
| 114 (16 to 212)                                                                       |                                |                                    |                                                 |              |               |                      |                  | 14 (0 to 35)                     |                  |                   |
| <b>False negatives</b><br>(patients incorrectly classified as not having VWD type 2M) |                                |                                    |                                                 |              |               |                      |                  |                                  |                  |                   |
| <b>True negatives</b><br>(patients without VWD type 2M)                               | 4 studies<br>3081 patients     | cohort & case-control type studies | very serious <sup>a</sup>                       | not serious  | not serious   | not serious          | none             | 193 (188 to 198)                 | 198 (196 to 200) |                   |

| Outcome                                                                           | No of studies (No of patients) | Study design | Factors that may decrease certainty of evidence |              |               |             |                  | Effect per 1,000 patients tested               |            | Test accuracy CoE |
|-----------------------------------------------------------------------------------|--------------------------------|--------------|-------------------------------------------------|--------------|---------------|-------------|------------------|------------------------------------------------|------------|-------------------|
|                                                                                   |                                |              | Risk of bias                                    | Indirectness | Inconsistency | Imprecision | Publication bias | pre-test probability of 80%                    |            |                   |
|                                                                                   |                                |              |                                                 |              |               |             |                  | multimer analysis                              | VWF:CB     |                   |
| <b>False positives</b><br>(patients incorrectly classified as having VWD type 2M) |                                |              |                                                 |              |               |             |                  | 5 fewer TN in multimer analysis<br>7 (2 to 12) | 2 (0 to 4) | ⊕⊕○○<br>LOW       |
|                                                                                   |                                |              |                                                 |              |               |             |                  | 5 more FP in multimer analysis                 |            |                   |

### Explanations

- a. Case-control design makes patient selection bias serious. Different cut-offs were used in the VWF:CB/Ag ratios (0.5 in Popov versus 0.7 in Flood)
- b. A different clinical decision would be considered if the upper versus lower boundary of the pooled effect estimate was used
- c. Typically seen in patients with VWD type 2 in need for additional testing for subtype classification.

○ VWF:CB/Ag:

| Study                | TP | FP | FN | TN  | Sensitivity (95% CI) | Specificity (95% CI) | Sensitivity (95% CI) | Specificity (95% CI) |
|----------------------|----|----|----|-----|----------------------|----------------------|----------------------|----------------------|
| Flood 2013           | 18 | 1  | 0  | 145 | 1.00 [0.81, 1.00]    | 0.99 [0.96, 1.00]    |                      |                      |
| Jousselman 2018      | 7  | 0  | 0  | 21  | 1.00 [0.59, 1.00]    | 1.00 [0.84, 1.00]    |                      |                      |
| Perez-Rodriguez 2018 | 26 | 0  | 13 | 30  | 0.67 [0.50, 0.81]    | 1.00 [0.88, 1.00]    |                      |                      |
| Riddel 2002          | 25 | 0  | 0  | 22  | 1.00 [0.86, 1.00]    | 1.00 [0.85, 1.00]    |                      |                      |

|                          |                             |
|--------------------------|-----------------------------|
| Sensitivity <sup>c</sup> | 0.98 (95% CI: 0.96 to 1.00) |
| Specificity <sup>c</sup> | 0.99 (95% CI: 0.98 to 1.00) |

Prevalences 80%<sup>d</sup>

| a. Outcome                                                                            | No of studies (No of patients) | Study design                       | Factors that may decrease certainty of evidence |              |               |                      |                  | Effect per 1,000 patients tested |  | Test accuracy CoE |
|---------------------------------------------------------------------------------------|--------------------------------|------------------------------------|-------------------------------------------------|--------------|---------------|----------------------|------------------|----------------------------------|--|-------------------|
|                                                                                       |                                |                                    | Risk of bias                                    | Indirectness | Inconsistency | Imprecision          | Publication bias | pre-test probability of 80%      |  |                   |
| <b>True positives</b><br>(patients with VWD type 2M)                                  | 4 studies<br>89 patients       | cohort & case-control type studies | serious <sup>a</sup>                            | not serious  | not serious   | serious <sup>b</sup> | none             | 786 (765 to 800)                 |  | ⊕⊕○○<br>LOW       |
| <b>False negatives</b><br>(patients incorrectly classified as not having VWD type 2M) |                                |                                    |                                                 |              |               |                      |                  | 14 (0 to 35)                     |  |                   |
| <b>True negatives</b><br>(patients without VWD type 2M)                               | 4 studies<br>219 patients      | cohort & case-control type studies | serious <sup>a</sup>                            | not serious  | not serious   | serious <sup>b</sup> | none             | 198 (196 to 200)                 |  |                   |



## *Explanations*

- a. Case-control design makes patient selection bias serious
- b. The confidence intervals of the single effect estimates do not overlap with other effect estimates
- c. Typically seen in patients with VWD type 2 in need for additional testing for subtype classification.
- d. Pooled in proportion since the number of studies does not allow for diagnostic test accuracy pooling.

## References:

1. Perez-Rodriguez A, Batlle, J., Corrales, I., Borrás, N., Rodríguez-Trillo, A., Loures, E., Cid, A. R., Bonanad, S., Cabrera, N., Moret, A., Parra, R., Mingot-Castellano, M. E., Navarro, N., Altisent, C., Perez-Montes, R., Marcellini, S., Moreto, A., Herrero, S., Soto, I., Fernandez Mosteirín, N., Jimenez-Yuste, V., Alonso, N., de Andres Jacob, A., Fontanes, E., Campos, R., Paloma, M. J., Bermejo, N., Berruero, R., Mateo, J., Arribalzaga, K., Marco, P., Palomo, A., Castro Quismondo, N., Inigo, B., Nieto, M. D. M., Vidal, R., Martínez, M. P., Aguinaco, R., Tenorio, M., Ferreiro, M., Garcia-Frade, J., Rodríguez-Huerta, A. M., Cuesta, J., Rodríguez-Gonzalez, R., Garcia-Candel, F., Dobon, M., Aguilar, C., Batlle, F., Vidal, F., Lopez-Fernandez, M. F. Role of multimeric analysis of von Willebrand factor (VWF) in von Willebrand disease (VWD) diagnosis: Lessons from the PCM-EVW-ES Spanish project. *PLoS One*. 2018;13(6):e0197876.
2. I. M. Vangenechten K, Smejkal, P., Zapletal, O., Michiels, J. J., Moore, G. W., Gadisseur, A. A comparative analysis of different automated von Willebrand factor glycoprotein Ib-binding activity assays in well typed von Willebrand disease patients. 2018.
3. E. J. Jousseme Y, Rugeri, L., Negrier, C., Nougier, C. Comparison of an automated chemiluminescent assay to a manual ELISA assay for determination of von Willebrand Factor collagen binding activity on VWD plasma patients previously diagnosed through molecular analysis of VWF. 2018.
4. Bowyer AE, Goodfellow, K. J., Seidel, H., Westhofen, P., Stufano, F., Goodeve, A., Kitchen, S., Makris, M. Evaluation of a semi-automated von Willebrand factor multimer assay, the Hydragel 5 von Willebrand multimer, by two European Centers. *Res Pract Thromb Haemost*. 2018;2(4):790-799.
5. Casonato A, Daidone, V., Galletta, E., Bertomoro, A. Type 2B von Willebrand disease with or without large multimers: A distinction of the two sides of the disorder is long overdue. *PLoS ONE*. 2017;12 (6) (no pagination)(e0179566).
6. Ni Y, Nesrallah, J., Agnew, M., Geske, F. J., Favaloro, E. J. Establishment and characterization of a new and stable collagen-binding assay for the assessment of von Willebrand factor activity. *International Journal of Laboratory Hematology*. 2013;35(2):170-176.
7. Flood VH, Gill, J. C., Friedman, K. D., Christopherson, P. A., Jacobi, P. M., Hoffmann, R. G., Montgomery, R. R., Haberichter, S. L. Collagen binding provides a sensitive screen for variant von willebrand disease. *Clinical Chemistry*. 2013;59(4):684-691.
8. Popov J, Zhukov, O., Ruden, S., Zeschmann, T., Sferruzza, A., Sahud, M. Performance and clinical utility of a commercial von Willebrand factor collagen binding assay for laboratory diagnosis of von Willebrand disease. *Clinical Chemistry*. 2006;52(10):1965-1967.
9. Adcock DM, Bethel, M., Valcour, A. Diagnosing von Willebrand disease: A large reference laboratory's perspective. *Seminars in Thrombosis and Hemostasis*. 2006;32(5):472-479.
10. Riddell AF, Jenkins, P. V., Nitu-Whalley, I. C., McCraw, A. H., Lee, C. A., Brown, S. A. Use of the collagen-binding assay for von Willebrand factor in the analysis of type 2M von Willebrand disease: a comparison with the ristocetin cofactor assay. *Br J Haematol*. 2002;116(1):187-192.
11. Federici AB, Canciani, M. T., Forza, I., Cozzi, G. Ristocetin cofactor and collagen binding activities normalized to antigen levels for a rapid diagnosis of type 2 von Willebrand disease--single center comparison of four different assays. *Thromb Haemost*. 2000;84(6):1127-1128

## Question 9

| Should genetic testing vs. ristocetin-induced platelet aggregation (RIPA) be used to diagnose VWD type 2B in patients suspected of VWD type 2? |                                                                                                                                                                                                                                                                                                                                                                                                                                                                                                                                                                                                                                                                                                                                                                                                                                                                                                                                                                                                                                                                                                                                                                                                                                                                                                                                                                                                                                                                                                                                                 |
|------------------------------------------------------------------------------------------------------------------------------------------------|-------------------------------------------------------------------------------------------------------------------------------------------------------------------------------------------------------------------------------------------------------------------------------------------------------------------------------------------------------------------------------------------------------------------------------------------------------------------------------------------------------------------------------------------------------------------------------------------------------------------------------------------------------------------------------------------------------------------------------------------------------------------------------------------------------------------------------------------------------------------------------------------------------------------------------------------------------------------------------------------------------------------------------------------------------------------------------------------------------------------------------------------------------------------------------------------------------------------------------------------------------------------------------------------------------------------------------------------------------------------------------------------------------------------------------------------------------------------------------------------------------------------------------------------------|
| <b>POPULATION:</b>                                                                                                                             | patients suspected of VWD type 2B                                                                                                                                                                                                                                                                                                                                                                                                                                                                                                                                                                                                                                                                                                                                                                                                                                                                                                                                                                                                                                                                                                                                                                                                                                                                                                                                                                                                                                                                                                               |
| <b>INTERVENTION:</b>                                                                                                                           | genetic testing                                                                                                                                                                                                                                                                                                                                                                                                                                                                                                                                                                                                                                                                                                                                                                                                                                                                                                                                                                                                                                                                                                                                                                                                                                                                                                                                                                                                                                                                                                                                 |
| <b>COMPARISON:</b>                                                                                                                             | ristocetin-induced platelet aggregation (RIPA)                                                                                                                                                                                                                                                                                                                                                                                                                                                                                                                                                                                                                                                                                                                                                                                                                                                                                                                                                                                                                                                                                                                                                                                                                                                                                                                                                                                                                                                                                                  |
| <b>PURPOSE OF THE TEST:</b>                                                                                                                    | Identify VWD type 2B patients                                                                                                                                                                                                                                                                                                                                                                                                                                                                                                                                                                                                                                                                                                                                                                                                                                                                                                                                                                                                                                                                                                                                                                                                                                                                                                                                                                                                                                                                                                                   |
| <b>ROLE OF THE TEST:</b>                                                                                                                       | Identify VWD type 2B patients                                                                                                                                                                                                                                                                                                                                                                                                                                                                                                                                                                                                                                                                                                                                                                                                                                                                                                                                                                                                                                                                                                                                                                                                                                                                                                                                                                                                                                                                                                                   |
| <b>LINKED TREATMENTS:</b>                                                                                                                      | Tranexamic acid, Factor replacement                                                                                                                                                                                                                                                                                                                                                                                                                                                                                                                                                                                                                                                                                                                                                                                                                                                                                                                                                                                                                                                                                                                                                                                                                                                                                                                                                                                                                                                                                                             |
| <b>ANTICIPATED OUTCOMES:</b>                                                                                                                   | RIPA – False positive, RIPA– False negative, RIPA – True positive, RIPA – True negative Major bleeding, transfusion and treatment, blood loss, gastrointestinal bleeding, symptom severity, minor bleeding, mortality.                                                                                                                                                                                                                                                                                                                                                                                                                                                                                                                                                                                                                                                                                                                                                                                                                                                                                                                                                                                                                                                                                                                                                                                                                                                                                                                          |
| <b>SETTING:</b>                                                                                                                                | Outpatient                                                                                                                                                                                                                                                                                                                                                                                                                                                                                                                                                                                                                                                                                                                                                                                                                                                                                                                                                                                                                                                                                                                                                                                                                                                                                                                                                                                                                                                                                                                                      |
| <b>PERSPECTIVE:</b>                                                                                                                            | Clinical recommendation – population perspective                                                                                                                                                                                                                                                                                                                                                                                                                                                                                                                                                                                                                                                                                                                                                                                                                                                                                                                                                                                                                                                                                                                                                                                                                                                                                                                                                                                                                                                                                                |
| <b>BACKGROUND:</b>                                                                                                                             | <p>Von Willebrand disease (VWD) is the most common inherited bleeding disorder known in humans: while estimated to affect between 0.1 and 1% of the general population, many are never diagnosed. VWD diagnosis and classification require numerous laboratory tests. (Pathare, 2018). Type 2 VWD accounts for 25% of cases and results from the expression of a functionally abnormal VWF molecule (Lavin 2017). Diagnosis and classification of VWD require correlation between clinical findings and laboratory results. Recommended initial laboratory tests include measurements of plasma VWF antigen (VWF:Ag), VWF-platelet GP Ib binding activity (e.g. VWF:RCo) and FVIII:C (Chenn, 2011). The ratio of VWF:RCo/VWF:Ag is used to distinguish type 2 from other VWD types. More tests like multimer analysis, RIPA, genetic testing and VWF:FVIII are used to characterize the subtypes of the disease.</p> <p>Sometimes, different workers ascribe the same mutation to differing types of VWD, and different types of VWD will seemingly arise from mutations in close proximity on the VWF gene. Genetic testing for VWD is not fool-proof, is likely to be very costly, and has not as yet been shown to be cost-effective in the diagnostic setting. VWD can arise from genetic events unrelated to the VWF gene, and the expression of VWF and the clinical severity in individual patients can be influenced by several epigenetic events. Most of these additional complexities currently remain unknown (Favaloro, 2008).</p> |
| <b>SUBGROUPS:</b>                                                                                                                              |                                                                                                                                                                                                                                                                                                                                                                                                                                                                                                                                                                                                                                                                                                                                                                                                                                                                                                                                                                                                                                                                                                                                                                                                                                                                                                                                                                                                                                                                                                                                                 |
| <b>CONFLICT OF INTERESTS:</b>                                                                                                                  | ASH conflict of interest declaration and management policies were applied, and the following panel members were voting panel members (determining the direction and strength of the recommendation): Sandra Haberichter, Simon McRae, Robert Montgomery, James O'Donnell, Claire McLintock, Barbara Ameer, Nicolas Giraud, Nikole Scappe, Vicki Jacobs-Pratt, Paula James, Nathan Connell.                                                                                                                                                                                                                                                                                                                                                                                                                                                                                                                                                                                                                                                                                                                                                                                                                                                                                                                                                                                                                                                                                                                                                      |



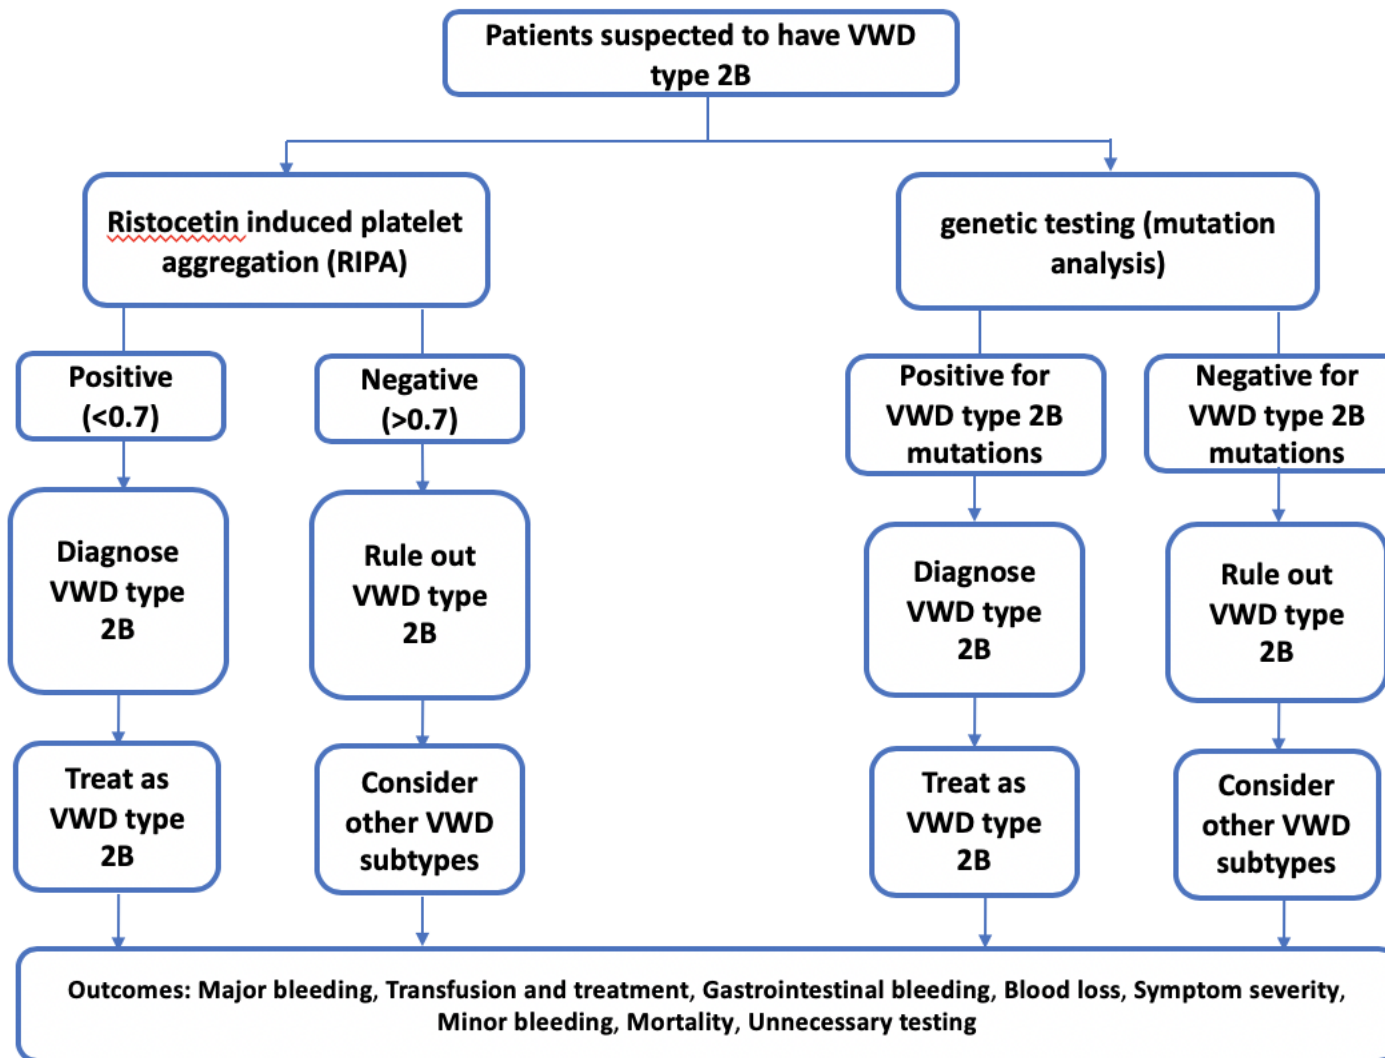

## ASSESSMENT

### Problem

Is the problem a priority?

| JUDGEMENT                                                                                                                                                    | RESEARCH EVIDENCE                                                                                                                                                                                                                                                                                                                                                                                                                                                                                                                                                                                                                                                                                                                                                                                                                                                                                                    | ADDITIONAL CONSIDERATIONS                                                                                       |
|--------------------------------------------------------------------------------------------------------------------------------------------------------------|----------------------------------------------------------------------------------------------------------------------------------------------------------------------------------------------------------------------------------------------------------------------------------------------------------------------------------------------------------------------------------------------------------------------------------------------------------------------------------------------------------------------------------------------------------------------------------------------------------------------------------------------------------------------------------------------------------------------------------------------------------------------------------------------------------------------------------------------------------------------------------------------------------------------|-----------------------------------------------------------------------------------------------------------------|
| <ul style="list-style-type: none"> <li>○ No</li> <li>○ Probably no</li> <li>● Probably yes</li> <li>○ Yes</li> <li>○ Varies</li> <li>○ Don't know</li> </ul> | <p>Von Willebrand disease (VWD) is the most common inherited bleeding disorder known in humans: while estimated to affect between 0.1 and 1% of the general population, many are never diagnosed. VWD diagnosis and classification require numerous laboratory tests. (Pathare, 2018). Type 2 VWD accounts for 25% of cases and results from the expression of a functionally abnormal VWF molecule (Lavin 2017). Diagnosis and classification of VWD require correlation between clinical findings and laboratory results. Recommended initial laboratory tests include measurements of plasma VWF antigen (VWF:Ag), VWF-platelet GP Ib binding activity (e.g. VWF:RCo) and FVIII:C (Chenn, 2011). The ratio of VWF:RCo/VWF:Ag is used to distinguish type 2 from other VWD types. More tests like multimer analysis, RIPA, genetic testing and VWF:FVIII are used to characterize the subtypes of the disease.</p> | <p>This question was judged to be a priority among many candidate questions to address in these guidelines.</p> |

**Test accuracy**  
How accurate is the test?

| JUDGEMENT                                                                                                                                                                      | RESEARCH EVIDENCE                                                                                                                                                                                                                                                                                                                                                                                                                                                                                                                                                                                                                                                                                                                                                                                                                                                                                                                                                                                                                                                                                                                                                                                                                                                                                                                                                                                                          | ADDITIONAL CONSIDERATIONS |                                                     |                  |                 |            |                              |                                   |                              |                                   |               |  |                |  |               |  |                 |      |                 |      |                 |      |                                  |               |              |                  |                  |            |            |         |                          |                                                                                                                                                                                                                                                                                                                                                   |
|--------------------------------------------------------------------------------------------------------------------------------------------------------------------------------|----------------------------------------------------------------------------------------------------------------------------------------------------------------------------------------------------------------------------------------------------------------------------------------------------------------------------------------------------------------------------------------------------------------------------------------------------------------------------------------------------------------------------------------------------------------------------------------------------------------------------------------------------------------------------------------------------------------------------------------------------------------------------------------------------------------------------------------------------------------------------------------------------------------------------------------------------------------------------------------------------------------------------------------------------------------------------------------------------------------------------------------------------------------------------------------------------------------------------------------------------------------------------------------------------------------------------------------------------------------------------------------------------------------------------|---------------------------|-----------------------------------------------------|------------------|-----------------|------------|------------------------------|-----------------------------------|------------------------------|-----------------------------------|---------------|--|----------------|--|---------------|--|-----------------|------|-----------------|------|-----------------|------|----------------------------------|---------------|--------------|------------------|------------------|------------|------------|---------|--------------------------|---------------------------------------------------------------------------------------------------------------------------------------------------------------------------------------------------------------------------------------------------------------------------------------------------------------------------------------------------|
| <ul style="list-style-type: none"> <li>○ Very inaccurate</li> <li>○ Inaccurate</li> <li>● Accurate</li> <li>○ Very accurate</li> <li>○ Varies</li> <li>○ Don't know</li> </ul> | <p>Different studies report different RIPA concentrations. The higher the concentration the higher the sensitivity, and the lower the concentration the higher the specificity. Genotype was considered to be the reference standard and correlation was made with RIPA results, providing the sensitivity of RIPA.</p> <p>The methods used in selecting patients led to the difference in the frequency (around 60%, unlike the majority that has 100%). It can also be due to some genotypes being more common and more picked up than others.</p> <table border="1" style="width: 100%; border-collapse: collapse; text-align: center;"> <thead> <tr> <th rowspan="3">Test result</th> <th colspan="6">Number of results per 1000 patients tested (95% CI)</th> <th rowspan="3">No of participants (studies)</th> <th rowspan="3">Certainty of the evidence (GRADE)</th> </tr> <tr> <th colspan="2">Prevalence 1%</th> <th colspan="2">Prevalence 50%</th> <th colspan="2">Prevalence 0%</th> </tr> <tr> <th>Genetic testing</th> <th>RIPA</th> <th>Genetic testing</th> <th>RIPA</th> <th>Genetic testing</th> <th>RIPA</th> </tr> </thead> <tbody> <tr> <td>True positives patients with VWD</td> <td>10 (10 to 10)</td> <td>10 (6 to 10)</td> <td>500 (500 to 500)</td> <td>495 (300 to 500)</td> <td>0 (0 to 0)</td> <td>0 (0 to 0)</td> <td>296 (9)</td> <td>⊕⊕○○<br/>LOW<sup>a</sup></td> </tr> </tbody> </table> | Test result               | Number of results per 1000 patients tested (95% CI) |                  |                 |            |                              |                                   | No of participants (studies) | Certainty of the evidence (GRADE) | Prevalence 1% |  | Prevalence 50% |  | Prevalence 0% |  | Genetic testing | RIPA | Genetic testing | RIPA | Genetic testing | RIPA | True positives patients with VWD | 10 (10 to 10) | 10 (6 to 10) | 500 (500 to 500) | 495 (300 to 500) | 0 (0 to 0) | 0 (0 to 0) | 296 (9) | ⊕⊕○○<br>LOW <sup>a</sup> | <p>Many mutations for type 2B VWD are known, but not all of them. In fact, type 2B reflects a gain of function mutation so there would be less mutations that can create this gain of function unlike loss of function mutation in other subtypes (e.g. type 2N VWD) leading to the certainty about genetic testing for type 2B to be higher.</p> |
| Test result                                                                                                                                                                    | Number of results per 1000 patients tested (95% CI)                                                                                                                                                                                                                                                                                                                                                                                                                                                                                                                                                                                                                                                                                                                                                                                                                                                                                                                                                                                                                                                                                                                                                                                                                                                                                                                                                                        |                           |                                                     |                  |                 |            | No of participants (studies) | Certainty of the evidence (GRADE) |                              |                                   |               |  |                |  |               |  |                 |      |                 |      |                 |      |                                  |               |              |                  |                  |            |            |         |                          |                                                                                                                                                                                                                                                                                                                                                   |
|                                                                                                                                                                                | Prevalence 1%                                                                                                                                                                                                                                                                                                                                                                                                                                                                                                                                                                                                                                                                                                                                                                                                                                                                                                                                                                                                                                                                                                                                                                                                                                                                                                                                                                                                              |                           | Prevalence 50%                                      |                  | Prevalence 0%   |            |                              |                                   |                              |                                   |               |  |                |  |               |  |                 |      |                 |      |                 |      |                                  |               |              |                  |                  |            |            |         |                          |                                                                                                                                                                                                                                                                                                                                                   |
|                                                                                                                                                                                | Genetic testing                                                                                                                                                                                                                                                                                                                                                                                                                                                                                                                                                                                                                                                                                                                                                                                                                                                                                                                                                                                                                                                                                                                                                                                                                                                                                                                                                                                                            | RIPA                      | Genetic testing                                     | RIPA             | Genetic testing | RIPA       |                              |                                   |                              |                                   |               |  |                |  |               |  |                 |      |                 |      |                 |      |                                  |               |              |                  |                  |            |            |         |                          |                                                                                                                                                                                                                                                                                                                                                   |
| True positives patients with VWD                                                                                                                                               | 10 (10 to 10)                                                                                                                                                                                                                                                                                                                                                                                                                                                                                                                                                                                                                                                                                                                                                                                                                                                                                                                                                                                                                                                                                                                                                                                                                                                                                                                                                                                                              | 10 (6 to 10)              | 500 (500 to 500)                                    | 495 (300 to 500) | 0 (0 to 0)      | 0 (0 to 0) | 296 (9)                      | ⊕⊕○○<br>LOW <sup>a</sup>          |                              |                                   |               |  |                |  |               |  |                 |      |                 |      |                 |      |                                  |               |              |                  |                  |            |            |         |                          |                                                                                                                                                                                                                                                                                                                                                   |

|                                                                                                                                            |                                                                                                                                                                                                                                                                                                                                                                                                                                                                                                                                                                                                                                                                                                                                                                                                    |            |                                 |              |                                  |            |                               |  |                                                                           |            |            |            |              |            |            |                               |  |                               |  |                               |  |                                 |  |                                 |  |                                  |  |  |  |
|--------------------------------------------------------------------------------------------------------------------------------------------|----------------------------------------------------------------------------------------------------------------------------------------------------------------------------------------------------------------------------------------------------------------------------------------------------------------------------------------------------------------------------------------------------------------------------------------------------------------------------------------------------------------------------------------------------------------------------------------------------------------------------------------------------------------------------------------------------------------------------------------------------------------------------------------------------|------------|---------------------------------|--------------|----------------------------------|------------|-------------------------------|--|---------------------------------------------------------------------------|------------|------------|------------|--------------|------------|------------|-------------------------------|--|-------------------------------|--|-------------------------------|--|---------------------------------|--|---------------------------------|--|----------------------------------|--|--|--|
|                                                                                                                                            | <table border="1"> <tr> <td>type 2B</td> <td colspan="2">0 fewer TP in Genetic testing</td> <td colspan="2">5 more TP in Genetic testing</td> <td colspan="2">0 fewer TP in Genetic testing</td> </tr> <tr> <td rowspan="3">False negatives patients incorrectly classified as not having VWD type 2B</td> <td>0 (0 to 0)</td> <td>0 (0 to 4)</td> <td>0 (0 to 0)</td> <td>5 (0 to 200)</td> <td>0 (0 to 0)</td> <td>0 (0 to 0)</td> </tr> <tr> <td colspan="2">0 fewer FN in Genetic testing</td> <td colspan="2">5 fewer FN in Genetic testing</td> <td colspan="2">0 fewer FN in Genetic testing</td> </tr> <tr> <td colspan="2">990 fewer FP in Genetic testing</td> <td colspan="2">500 fewer FP in Genetic testing</td> <td colspan="2">1000 fewer FP in Genetic testing</td> </tr> </table> | type 2B    | 0 fewer TP in Genetic testing   |              | 5 more TP in Genetic testing     |            | 0 fewer TP in Genetic testing |  | False negatives patients incorrectly classified as not having VWD type 2B | 0 (0 to 0) | 0 (0 to 4) | 0 (0 to 0) | 5 (0 to 200) | 0 (0 to 0) | 0 (0 to 0) | 0 fewer FN in Genetic testing |  | 5 fewer FN in Genetic testing |  | 0 fewer FN in Genetic testing |  | 990 fewer FP in Genetic testing |  | 500 fewer FP in Genetic testing |  | 1000 fewer FP in Genetic testing |  |  |  |
| type 2B                                                                                                                                    | 0 fewer TP in Genetic testing                                                                                                                                                                                                                                                                                                                                                                                                                                                                                                                                                                                                                                                                                                                                                                      |            | 5 more TP in Genetic testing    |              | 0 fewer TP in Genetic testing    |            |                               |  |                                                                           |            |            |            |              |            |            |                               |  |                               |  |                               |  |                                 |  |                                 |  |                                  |  |  |  |
| False negatives patients incorrectly classified as not having VWD type 2B                                                                  | 0 (0 to 0)                                                                                                                                                                                                                                                                                                                                                                                                                                                                                                                                                                                                                                                                                                                                                                                         | 0 (0 to 4) | 0 (0 to 0)                      | 5 (0 to 200) | 0 (0 to 0)                       | 0 (0 to 0) |                               |  |                                                                           |            |            |            |              |            |            |                               |  |                               |  |                               |  |                                 |  |                                 |  |                                  |  |  |  |
|                                                                                                                                            | 0 fewer FN in Genetic testing                                                                                                                                                                                                                                                                                                                                                                                                                                                                                                                                                                                                                                                                                                                                                                      |            | 5 fewer FN in Genetic testing   |              | 0 fewer FN in Genetic testing    |            |                               |  |                                                                           |            |            |            |              |            |            |                               |  |                               |  |                               |  |                                 |  |                                 |  |                                  |  |  |  |
|                                                                                                                                            | 990 fewer FP in Genetic testing                                                                                                                                                                                                                                                                                                                                                                                                                                                                                                                                                                                                                                                                                                                                                                    |            | 500 fewer FP in Genetic testing |              | 1000 fewer FP in Genetic testing |            |                               |  |                                                                           |            |            |            |              |            |            |                               |  |                               |  |                               |  |                                 |  |                                 |  |                                  |  |  |  |
| <p>a. Serious study population bias because of Case-Control design, and serious reference standard and/or index test bias in 9 studies</p> |                                                                                                                                                                                                                                                                                                                                                                                                                                                                                                                                                                                                                                                                                                                                                                                                    |            |                                 |              |                                  |            |                               |  |                                                                           |            |            |            |              |            |            |                               |  |                               |  |                               |  |                                 |  |                                 |  |                                  |  |  |  |
| <p>Refer to the Appendix at the end of the document.</p>                                                                                   |                                                                                                                                                                                                                                                                                                                                                                                                                                                                                                                                                                                                                                                                                                                                                                                                    |            |                                 |              |                                  |            |                               |  |                                                                           |            |            |            |              |            |            |                               |  |                               |  |                               |  |                                 |  |                                 |  |                                  |  |  |  |

### Desirable Effects

How substantial are the desirable anticipated effects?

| JUDGEMENT                                                                                                                                                 | RESEARCH EVIDENCE                                                                                                                                                                                                                                                                                                                                                                                                                                                                                                                                                                                                                                                                                                                                                                                                                                                                                                                                                                                                                                 | ADDITIONAL CONSIDERATIONS                                                                                                                 |
|-----------------------------------------------------------------------------------------------------------------------------------------------------------|---------------------------------------------------------------------------------------------------------------------------------------------------------------------------------------------------------------------------------------------------------------------------------------------------------------------------------------------------------------------------------------------------------------------------------------------------------------------------------------------------------------------------------------------------------------------------------------------------------------------------------------------------------------------------------------------------------------------------------------------------------------------------------------------------------------------------------------------------------------------------------------------------------------------------------------------------------------------------------------------------------------------------------------------------|-------------------------------------------------------------------------------------------------------------------------------------------|
| <ul style="list-style-type: none"> <li>○ Trivial</li> <li>○ Small</li> <li>● Moderate</li> <li>○ Large</li> <li>○ Varies</li> <li>○ Don't know</li> </ul> | <p><b>True Positive:</b> These are patients who have VWD type 2B, and who received preventive and appropriate treatment. They benefit from decreasing the risk of bleeding with treatment and they suffer the side effects of treatment.</p> <p><b>True Negative:</b> These are patients who did not have VWD type 2B, and who were correctly identified as not having the disease. They will appropriately not receive treatment for VWD type 2B, and not suffer the side effects of treatment, but may benefit from treatment for other bleeding disorders.</p> <p><b>False Negative:</b> These are patients who have VWD type 2B, but the diagnosis was missed and will be sent home without appropriate treatment. They face the risks of prolonged and heavy bleeding due to not receiving treatment. They will be considered for other bleeding disorders.</p> <p><b>False Positive:</b> These are patients who did not have VWD type 2B, but they will be labeled as having VWD type 2B and receive unnecessary treatment. They do not</p> | <p>RIPA: get the results fast, and picks up platelet type VWD</p> <p>Genetics: chance of getting a more definitive answer, counseling</p> |

|  |                                                                                                                                                                                                          |  |
|--|----------------------------------------------------------------------------------------------------------------------------------------------------------------------------------------------------------|--|
|  | benefit from the treatment for type 2B. They may benefit from the treatment if they have other bleeding disorders, but they suffer side effects.<br><br>Refer to the Appendix at the end of the document |  |
|--|----------------------------------------------------------------------------------------------------------------------------------------------------------------------------------------------------------|--|

### Undesirable Effects

How substantial are the undesirable anticipated effects?

| JUDGEMENT                                                                                                                                                 | RESEARCH EVIDENCE                                                                                                                                                                                                                                                                                                                                                                                                                                                                                                                                                                                                                                                                                                                                                                                                                                                                                                                                                                                                                                                                                                                                                                                                                                          | ADDITIONAL CONSIDERATIONS |
|-----------------------------------------------------------------------------------------------------------------------------------------------------------|------------------------------------------------------------------------------------------------------------------------------------------------------------------------------------------------------------------------------------------------------------------------------------------------------------------------------------------------------------------------------------------------------------------------------------------------------------------------------------------------------------------------------------------------------------------------------------------------------------------------------------------------------------------------------------------------------------------------------------------------------------------------------------------------------------------------------------------------------------------------------------------------------------------------------------------------------------------------------------------------------------------------------------------------------------------------------------------------------------------------------------------------------------------------------------------------------------------------------------------------------------|---------------------------|
| <ul style="list-style-type: none"> <li>○ Large</li> <li>○ Moderate</li> <li>○ Small</li> <li>● Trivial</li> <li>○ Varies</li> <li>○ Don't know</li> </ul> | <p><b>True Positive:</b> These are patients who have VWD type 2B, and who received preventive and appropriate treatment. They benefit from decreasing the risk of bleeding with treatment and they suffer the side effects of treatment.</p> <p><b>True Negative:</b> These are patients who did not have VWD type 2B, and who were correctly identified as not having the disease. They will appropriately not receive treatment for VWD type 2B, and not suffer the side effects of treatment, but may benefit from treatment for other bleeding disorders.</p> <p><b>False Negative:</b> These are patients who have VWD type 2B, but the diagnosis was missed and will be sent home without appropriate treatment. They face the risks of prolonged and heavy bleeding due to not receiving treatment. They will be considered for other bleeding disorders.</p> <p><b>False Positive:</b> These are patients who did not have VWD type 2B, but they will be labeled as having VWD type 2B and receive unnecessary treatment. They do not benefit from the treatment for type 2B. They may benefit from the treatment if they have other bleeding disorders, but they suffer side effects.</p> <p>Refer to the Appendix at the end of the document</p> |                           |

### Certainty of the evidence of test accuracy

What is the overall certainty of the evidence of test accuracy?

| JUDGEMENT                                                                                                                                      | RESEARCH EVIDENCE                                | ADDITIONAL CONSIDERATIONS |
|------------------------------------------------------------------------------------------------------------------------------------------------|--------------------------------------------------|---------------------------|
| <ul style="list-style-type: none"> <li>○ Very low</li> <li>● Low</li> <li>○ Moderate</li> <li>○ High</li> <li>○ No included studies</li> </ul> | Refer to the Appendix at the end of the document |                           |

### Certainty of the evidence of test's effects

What is the overall certainty of the evidence for any critical or important direct benefits, adverse effects or burden of the test?

| JUDGEMENT                                                                                                                                                                                     | RESEARCH EVIDENCE                                                                                                                                          | ADDITIONAL CONSIDERATIONS                                                                                                                                                                                                                                                                                                                           |
|-----------------------------------------------------------------------------------------------------------------------------------------------------------------------------------------------|------------------------------------------------------------------------------------------------------------------------------------------------------------|-----------------------------------------------------------------------------------------------------------------------------------------------------------------------------------------------------------------------------------------------------------------------------------------------------------------------------------------------------|
| <ul style="list-style-type: none"> <li>○ Very low</li> <li>○ Low</li> <li>○ Moderate</li> <li>○ High</li> <li>● No included studies</li> </ul>                                                | <p>Test's effects are not applicable since the intervention consists of a blood test that has no important direct benefits, adverse effects or burden.</p> |                                                                                                                                                                                                                                                                                                                                                     |
| <p><b>Certainty of the evidence of management's effects</b><br/>           What is the overall certainty of the evidence of effects of the management that is guided by the test results?</p> |                                                                                                                                                            |                                                                                                                                                                                                                                                                                                                                                     |
| JUDGEMENT                                                                                                                                                                                     | RESEARCH EVIDENCE                                                                                                                                          | ADDITIONAL CONSIDERATIONS                                                                                                                                                                                                                                                                                                                           |
| <ul style="list-style-type: none"> <li>○ Very low</li> <li>○ Low</li> <li>○ Moderate</li> <li>○ High</li> <li>● No included studies</li> </ul>                                                |                                                                                                                                                            |                                                                                                                                                                                                                                                                                                                                                     |
| <p><b>Certainty of the evidence of test result/management</b><br/>           How certain is the link between test results and management decisions?</p>                                       |                                                                                                                                                            |                                                                                                                                                                                                                                                                                                                                                     |
| JUDGEMENT                                                                                                                                                                                     | RESEARCH EVIDENCE                                                                                                                                          | ADDITIONAL CONSIDERATIONS                                                                                                                                                                                                                                                                                                                           |
| <ul style="list-style-type: none"> <li>○ Very low</li> <li>○ Low</li> <li>○ Moderate</li> <li>○ High</li> <li>● No included studies</li> </ul>                                                |                                                                                                                                                            | <p>The cut off between types 1 and 2 is mostly for classification purposes. It is not a critical factor when deciding on treatment. Desmopressin is more likely not to work for type 2 A and 2 M, and is relatively contraindicated for type 2 B. However, if the choice of treatment is not Desmopressin, the labeling will not have an effect</p> |
| <p><b>Certainty of effects</b><br/>           What is the overall certainty of the evidence of effects of the test?</p>                                                                       |                                                                                                                                                            |                                                                                                                                                                                                                                                                                                                                                     |
| JUDGEMENT                                                                                                                                                                                     | RESEARCH EVIDENCE                                                                                                                                          | ADDITIONAL CONSIDERATIONS                                                                                                                                                                                                                                                                                                                           |
| <ul style="list-style-type: none"> <li>● Very low</li> <li>○ Low</li> <li>○ Moderate</li> <li>○ High</li> </ul>                                                                               | <p>Refer to the Appendix at the end of the document</p>                                                                                                    |                                                                                                                                                                                                                                                                                                                                                     |

| ○ No included studies                                                                                                                                                                                                                                            |                          |                                                                                                                                                                                                                                                                                                                                                                                                                                                                                                                                                                                                                                                                                                                                                                                                                                                                                                                                                                                                                                                                                                                                                                                                                                                                                                                                                                         |
|------------------------------------------------------------------------------------------------------------------------------------------------------------------------------------------------------------------------------------------------------------------|--------------------------|-------------------------------------------------------------------------------------------------------------------------------------------------------------------------------------------------------------------------------------------------------------------------------------------------------------------------------------------------------------------------------------------------------------------------------------------------------------------------------------------------------------------------------------------------------------------------------------------------------------------------------------------------------------------------------------------------------------------------------------------------------------------------------------------------------------------------------------------------------------------------------------------------------------------------------------------------------------------------------------------------------------------------------------------------------------------------------------------------------------------------------------------------------------------------------------------------------------------------------------------------------------------------------------------------------------------------------------------------------------------------|
| <b>Values</b><br>Is there important uncertainty about or variability in how much people value the main outcomes?                                                                                                                                                 |                          |                                                                                                                                                                                                                                                                                                                                                                                                                                                                                                                                                                                                                                                                                                                                                                                                                                                                                                                                                                                                                                                                                                                                                                                                                                                                                                                                                                         |
| <b>JUDGEMENT</b>                                                                                                                                                                                                                                                 | <b>RESEARCH EVIDENCE</b> | <b>ADDITIONAL CONSIDERATIONS</b>                                                                                                                                                                                                                                                                                                                                                                                                                                                                                                                                                                                                                                                                                                                                                                                                                                                                                                                                                                                                                                                                                                                                                                                                                                                                                                                                        |
| <ul style="list-style-type: none"> <li>● Important uncertainty or variability</li> <li>○ Possibly important uncertainty or variability</li> <li>○ Probably no important uncertainty or variability</li> <li>○ No important uncertainty or variability</li> </ul> |                          | <p>Some individuals may be concerned regarding the impact of genetic testing on the determination of parentage (if family testing performed), along with normal privacy issues around genetic testing, as patients may have fears of what the sample may later be used to test for. Patients want to know that their genetic information is secure and anonymized.</p> <p>It is usually more complex to understand genetic testing. Anxiety might emerge for patients who have a mutation and information availability can impact other generations, who do not get consented in the process of diagnostic genetic testing. Patients want a test that is the most reliable. One concern is whether genetic testing will affect future ability to obtain health insurance (pre-existing condition). On the other hand, some patients find it very rewarding to know if they have a VWF mutation, especially when taking part in a study that would be published and help others.</p> <p>Regarding RIPA, the test must be done on a fresh sample, so the patient has to go to the lab performing the test since the sample can't be shipped. Time and need to travel to a specialized laboratory is a patient concern in some instances, as opposed to genetic testing where the sample can be sent out. Also, testing may require the patient to reattend the clinic</p> |

|  |  |                                                                                                                                                                                                                                                                                                                                                                                                                                                                             |
|--|--|-----------------------------------------------------------------------------------------------------------------------------------------------------------------------------------------------------------------------------------------------------------------------------------------------------------------------------------------------------------------------------------------------------------------------------------------------------------------------------|
|  |  | <p>more than once.<br/>         Patients are very familiar with having blood drawn for lab testing for any reason. Well-trained phlebotomists at blood disorder treatment centers are efficient and have a good technique which means little or no bruising from blood draws for specialized hematology laboratory tests. Patients care to have assays that can be trusted that will lead to an accurate diagnosis and don't have to be repeated on multiple occasions.</p> |
|--|--|-----------------------------------------------------------------------------------------------------------------------------------------------------------------------------------------------------------------------------------------------------------------------------------------------------------------------------------------------------------------------------------------------------------------------------------------------------------------------------|

**Balance of effects**  
 Does the balance between desirable and undesirable effects favor the intervention or the comparison?

| <b>JUDGEMENT</b>                                                                                                                                                                                                                                                                                               | <b>RESEARCH EVIDENCE</b>                                | <b>ADDITIONAL CONSIDERATIONS</b> |
|----------------------------------------------------------------------------------------------------------------------------------------------------------------------------------------------------------------------------------------------------------------------------------------------------------------|---------------------------------------------------------|----------------------------------|
| <ul style="list-style-type: none"> <li>○ Favors the comparison</li> <li>○ Probably favors the comparison</li> <li>○ Does not favor either the intervention or the comparison</li> <li>● Probably favors the intervention</li> <li>○ Favors the intervention</li> <li>○ Varies</li> <li>○ Don't know</li> </ul> | <p>Refer to the Appendix at the end of the document</p> |                                  |

**Resources required**  
 How large are the resource requirements (costs)?

| <b>JUDGEMENT</b> | <b>RESEARCH EVIDENCE</b> | <b>ADDITIONAL CONSIDERATIONS</b> |
|------------------|--------------------------|----------------------------------|
|------------------|--------------------------|----------------------------------|

| <ul style="list-style-type: none"> <li>○ Large costs</li> <li>○ Moderate costs</li> <li>● Negligible costs and savings</li> <li>○ Moderate savings</li> <li>○ Large savings</li> <li>○ Varies</li> <li>○ Don't know</li> </ul> | <p>* Genetic testing cost depends on how many exons have to be sequenced, and the sequencing is usually targeted to specific exons.</p> <table border="1" data-bbox="449 220 1031 388"> <thead> <tr> <th></th> <th></th> <th>Genetic testing</th> <th>RIPA</th> </tr> </thead> <tbody> <tr> <td>USA</td> <td>\$</td> <td>350-2000</td> <td>300-500</td> </tr> <tr> <td>Australia</td> <td>\$</td> <td>500</td> <td>500</td> </tr> <tr> <td>Europe</td> <td>€</td> <td>1000</td> <td>100</td> </tr> </tbody> </table> <p>There is considerable variability in cost among different jurisdictions. Cost is also affected by different factors including insurance plans. The estimate provided are based on the clinical experts best estimates.</p> |                 |         | Genetic testing | RIPA | USA | \$ | 350-2000 | 300-500 | Australia | \$ | 500 | 500 | Europe | € | 1000 | 100 |  |
|--------------------------------------------------------------------------------------------------------------------------------------------------------------------------------------------------------------------------------|----------------------------------------------------------------------------------------------------------------------------------------------------------------------------------------------------------------------------------------------------------------------------------------------------------------------------------------------------------------------------------------------------------------------------------------------------------------------------------------------------------------------------------------------------------------------------------------------------------------------------------------------------------------------------------------------------------------------------------------------------|-----------------|---------|-----------------|------|-----|----|----------|---------|-----------|----|-----|-----|--------|---|------|-----|--|
|                                                                                                                                                                                                                                |                                                                                                                                                                                                                                                                                                                                                                                                                                                                                                                                                                                                                                                                                                                                                    | Genetic testing | RIPA    |                 |      |     |    |          |         |           |    |     |     |        |   |      |     |  |
| USA                                                                                                                                                                                                                            | \$                                                                                                                                                                                                                                                                                                                                                                                                                                                                                                                                                                                                                                                                                                                                                 | 350-2000        | 300-500 |                 |      |     |    |          |         |           |    |     |     |        |   |      |     |  |
| Australia                                                                                                                                                                                                                      | \$                                                                                                                                                                                                                                                                                                                                                                                                                                                                                                                                                                                                                                                                                                                                                 | 500             | 500     |                 |      |     |    |          |         |           |    |     |     |        |   |      |     |  |
| Europe                                                                                                                                                                                                                         | €                                                                                                                                                                                                                                                                                                                                                                                                                                                                                                                                                                                                                                                                                                                                                  | 1000            | 100     |                 |      |     |    |          |         |           |    |     |     |        |   |      |     |  |

**Certainty of evidence of required resources**  
 What is the certainty of the evidence of resource requirements (costs)?

| <b>JUDGEMENT</b>                                                                                                                               | <b>RESEARCH EVIDENCE</b>                        | <b>ADDITIONAL CONSIDERATIONS</b> |
|------------------------------------------------------------------------------------------------------------------------------------------------|-------------------------------------------------|----------------------------------|
| <ul style="list-style-type: none"> <li>○ Very low</li> <li>○ Low</li> <li>● Moderate</li> <li>○ High</li> <li>○ No included studies</li> </ul> | <p>Taylor, 2015 used for genetic diagnosis.</p> |                                  |

**Cost effectiveness**  
 Does the cost-effectiveness of the intervention favor the intervention or the comparison?

| <b>JUDGEMENT</b> | <b>RESEARCH EVIDENCE</b> | <b>ADDITIONAL CONSIDERATIONS</b> |
|------------------|--------------------------|----------------------------------|
|------------------|--------------------------|----------------------------------|



|                                                                                                                                                                                                                                                                                                                         |  |  |
|-------------------------------------------------------------------------------------------------------------------------------------------------------------------------------------------------------------------------------------------------------------------------------------------------------------------------|--|--|
| <ul style="list-style-type: none"> <li>○ Favors the comparison</li> <li>○ Probably favors the comparison</li> <li>○ Does not favor either the intervention or the comparison</li> <li>○ Probably favors the intervention</li> <li>○ Favors the intervention</li> <li>○ Varies</li> <li>● No included studies</li> </ul> |  |  |
|-------------------------------------------------------------------------------------------------------------------------------------------------------------------------------------------------------------------------------------------------------------------------------------------------------------------------|--|--|

**Equity**  
What would be the impact on health equity?

| <b>JUDGEMENT</b>                                                                                                                                                                                                 | <b>RESEARCH EVIDENCE</b> | <b>ADDITIONAL CONSIDERATIONS</b>                                                                                                                                                                                                                                                                                                                                                                                                                                                                                                                                                                                                                                                                                                                                       |
|------------------------------------------------------------------------------------------------------------------------------------------------------------------------------------------------------------------|--------------------------|------------------------------------------------------------------------------------------------------------------------------------------------------------------------------------------------------------------------------------------------------------------------------------------------------------------------------------------------------------------------------------------------------------------------------------------------------------------------------------------------------------------------------------------------------------------------------------------------------------------------------------------------------------------------------------------------------------------------------------------------------------------------|
| <ul style="list-style-type: none"> <li>○ Reduced</li> <li>● Probably reduced</li> <li>○ Probably no impact</li> <li>○ Probably increased</li> <li>○ Increased</li> <li>○ Varies</li> <li>○ Don't know</li> </ul> |                          | <p>Genetic testing is not always covered by insurance, most insurance companies require prior authorization for genetic testing in the US, and decisions are made by insurance companies on a case-by-case basis. In many instances, research studies offer free genetic testing.</p> <p>RIPA are covered by insurance but may have a very high deductible.</p> <p>In New Zealand, all residents get blood tests for free. This is also applicable in the UK since there is no practical restriction on requesting these tests.</p> <p>RIPA and genetic testing is covered in Canada.</p> <p>Patients with access problems and those without health insurance are disadvantaged. Genetic testing is becoming more accessible and gives the confirmatory diagnosis.</p> |

**Acceptability**  
Is the intervention acceptable to key stakeholders?

| JUDGEMENT                                                                                                                                                    | RESEARCH EVIDENCE | ADDITIONAL CONSIDERATIONS                                                                                                                                                                                                                                                                                                                                                                                                                                                                                                                                                                                                                                                          |
|--------------------------------------------------------------------------------------------------------------------------------------------------------------|-------------------|------------------------------------------------------------------------------------------------------------------------------------------------------------------------------------------------------------------------------------------------------------------------------------------------------------------------------------------------------------------------------------------------------------------------------------------------------------------------------------------------------------------------------------------------------------------------------------------------------------------------------------------------------------------------------------|
| <ul style="list-style-type: none"> <li>○ No</li> <li>○ Probably no</li> <li>● Probably yes</li> <li>○ Yes</li> <li>○ Varies</li> <li>○ Don't know</li> </ul> |                   | <p>Generally, patients accept having genetic testing and prefer it over other assays if they believe it could impact their personal diagnosis and/or management by providing definite answers. However, some patients believe that genetic testing is not necessary to make the diagnosis. It will not change management and is costly; also it is difficult to perform and may not always reveal a mutation/known mutation. Rarely the testing is turned down because of concern over privacy and if there is a genetic counselor available to discuss the test with them. Appropriate counseling and education are required, in addition to confirmation of results privacy.</p> |

**Feasibility**  
Is the intervention feasible to implement?

| JUDGEMENT                                                                                                                                                    | RESEARCH EVIDENCE | ADDITIONAL CONSIDERATIONS                                                                                                                                                                                                                                                                                                                                                                                                                                                                                                                                                                                                                                                                                                                 |
|--------------------------------------------------------------------------------------------------------------------------------------------------------------|-------------------|-------------------------------------------------------------------------------------------------------------------------------------------------------------------------------------------------------------------------------------------------------------------------------------------------------------------------------------------------------------------------------------------------------------------------------------------------------------------------------------------------------------------------------------------------------------------------------------------------------------------------------------------------------------------------------------------------------------------------------------------|
| <ul style="list-style-type: none"> <li>○ No</li> <li>○ Probably no</li> <li>● Probably yes</li> <li>○ Yes</li> <li>○ Varies</li> <li>○ Don't know</li> </ul> |                   | <p>Although genetic testing is not available in all hospitals, most patients have access to it as it can be sent out to reference labs. However, the process of genetic testing may take much longer, so patients will have to wait longer for results. So patient access to the hospital may be a feasibility issue, considering rural and remote patients and repeated visits required to diagnose, which is important when testing is needed to guide treatment for active bleed. To note, more data on genotype-phenotype correlation is needed. Relying on genetic testing alone is not safe - it may reveal a variant whose significance is completely unknown - then functional testing would be needed anyway in such a case.</p> |

|  |  |                                                                                                                                                                                                                                                                                                                                                                                                                     |
|--|--|---------------------------------------------------------------------------------------------------------------------------------------------------------------------------------------------------------------------------------------------------------------------------------------------------------------------------------------------------------------------------------------------------------------------|
|  |  | RIPA is not available in all hospitals since a fresh sample and platelet aggregation studies are needed to perform the test, which is considered to be difficult. It is usually available in research-active departments and specialized laboratories but limited availability otherwise. When available, the test is performed at specific times and days only, which creates feasibility issues around this test. |
|--|--|---------------------------------------------------------------------------------------------------------------------------------------------------------------------------------------------------------------------------------------------------------------------------------------------------------------------------------------------------------------------------------------------------------------------|

### SUMMARY OF JUDGEMENTS

|                                                     | JUDGEMENT        |             |                     |                |  |        |                            |
|-----------------------------------------------------|------------------|-------------|---------------------|----------------|--|--------|----------------------------|
| PROBLEM                                             | No               | Probably no | <b>Probably yes</b> | Yes            |  | Varies | Don't know                 |
| TEST ACCURACY                                       | Very inaccurate  | Inaccurate  | <b>Accurate</b>     | Very accurate  |  | Varies | Don't know                 |
| DESIRABLE EFFECTS                                   | Trivial          | Small       | <b>Moderate</b>     | Large          |  | Varies | Don't know                 |
| UNDESIRABLE EFFECTS                                 | Large            | Moderate    | Small               | <b>Trivial</b> |  | Varies | Don't know                 |
| CERTAINTY OF THE EVIDENCE OF TEST ACCURACY          | Very low         | <b>Low</b>  | Moderate            | High           |  |        | No included studies        |
| CERTAINTY OF THE EVIDENCE OF TEST'S EFFECTS         | Very low         | Low         | Moderate            | High           |  |        | <b>No included studies</b> |
| CERTAINTY OF THE EVIDENCE OF MANAGEMENT'S EFFECTS   | Very low         | Low         | Moderate            | High           |  |        | <b>No included studies</b> |
| CERTAINTY OF THE EVIDENCE OF TEST RESULT/MANAGEMENT | Very low         | Low         | Moderate            | High           |  |        | <b>No included studies</b> |
| CERTAINTY OF EFFECTS                                | <b>Very low</b>  | Low         | Moderate            | High           |  |        | No included studies        |
| VALUES                                              | <b>Important</b> | Possibly    | Probably no         | No important   |  |        |                            |

|                                             | JUDGEMENT                  |                                      |                                                          |                                         |                         |        |                            |
|---------------------------------------------|----------------------------|--------------------------------------|----------------------------------------------------------|-----------------------------------------|-------------------------|--------|----------------------------|
|                                             | uncertainty or variability | important uncertainty or variability | important uncertainty or variability                     | uncertainty or variability              |                         |        |                            |
| BALANCE OF EFFECTS                          | Favors the comparison      | Probably favors the comparison       | Does not favor either the intervention or the comparison | <b>Probably favors the intervention</b> | Favors the intervention | Varies | Don't know                 |
| RESOURCES REQUIRED                          | Large costs                | Moderate costs                       | <b>Negligible costs and savings</b>                      | Moderate savings                        | Large savings           | Varies | Don't know                 |
| CERTAINTY OF EVIDENCE OF REQUIRED RESOURCES | Very low                   | Low                                  | <b>Moderate</b>                                          | High                                    |                         |        | No included studies        |
| COST EFFECTIVENESS                          | Favors the comparison      | Probably favors the comparison       | Does not favor either the intervention or the comparison | Probably favors the intervention        | Favors the intervention | Varies | <b>No included studies</b> |
| EQUITY                                      | Reduced                    | <b>Probably reduced</b>              | Probably no impact                                       | Probably increased                      | Increased               | Varies | Don't know                 |
| ACCEPTABILITY                               | No                         | Probably no                          | <b>Probably yes</b>                                      | Yes                                     |                         | Varies | Don't know                 |
| FEASIBILITY                                 | No                         | Probably no                          | <b>Probably yes</b>                                      | Yes                                     |                         | Varies | Don't know                 |

#### TYPE OF RECOMMENDATION

|                                                     |                                                          |                                                                               |                                                             |                                                 |
|-----------------------------------------------------|----------------------------------------------------------|-------------------------------------------------------------------------------|-------------------------------------------------------------|-------------------------------------------------|
| Strong recommendation against the intervention<br>○ | Conditional recommendation against the intervention<br>○ | Conditional recommendation for either the intervention or the comparison<br>○ | <b>Conditional recommendation for the intervention</b><br>● | Strong recommendation for the intervention<br>○ |
|-----------------------------------------------------|----------------------------------------------------------|-------------------------------------------------------------------------------|-------------------------------------------------------------|-------------------------------------------------|

#### CONCLUSIONS

Recommendation

The panel suggests targeted genetic testing, when available, over RIPA (ristocetin induced platelet agglutination) to diagnose Type 2B VWD in patients suspected of Type 2A or 2B in need of additional testing. (Please see Diagnostic algorithm xxx)  
(Conditional recommendation based on low certainty in the evidence)

Remark:

- Confirmatory testing with the other assay (or additional assays) is commonly performed.

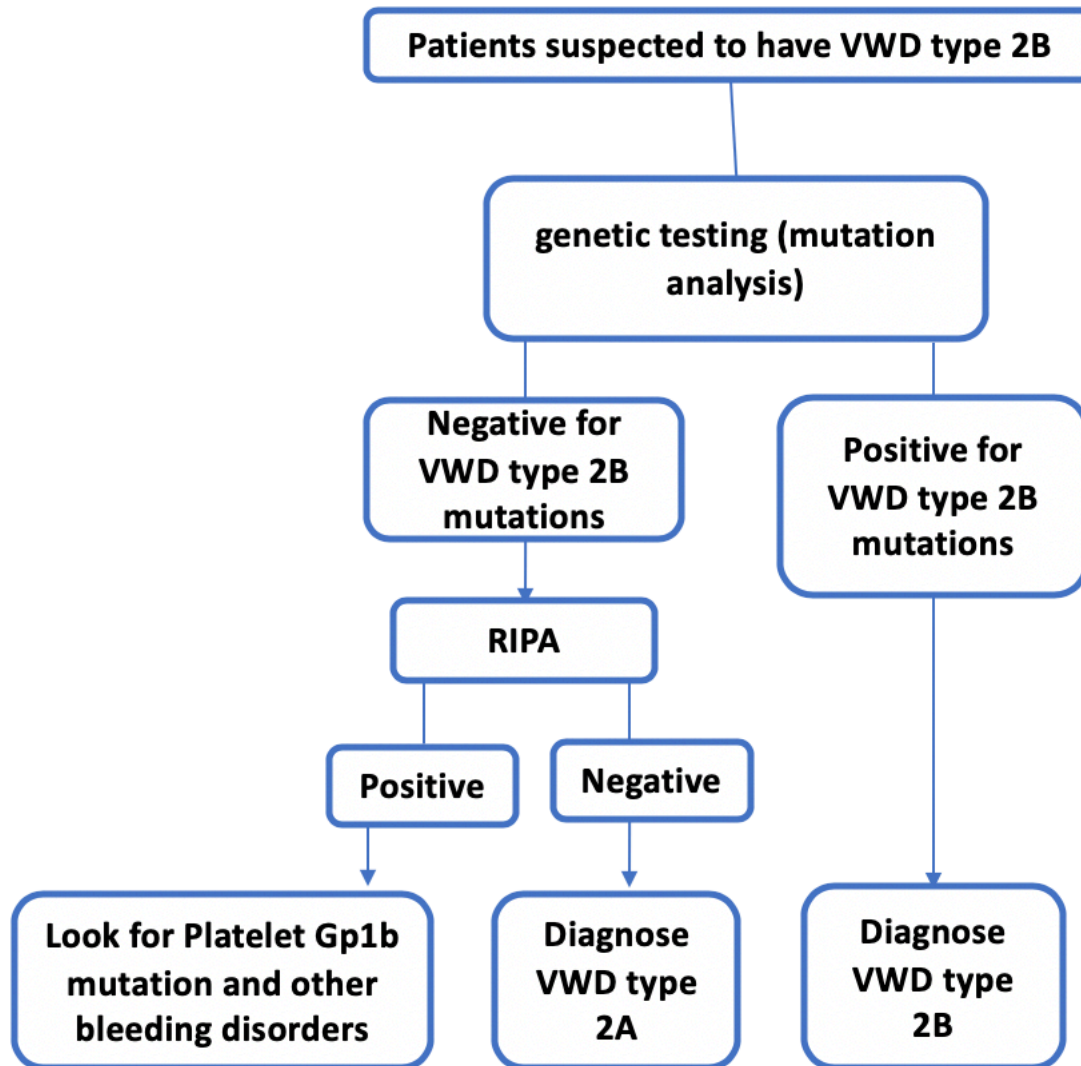

## Justification

The guideline panel determined that there is low certainty in the evidence for a net health benefit from using genetic testing over RIPA in patients suspected of VWD type 2A, 2B in need for additional testing. Other EtD criteria were generally in favor of using genetic testing so that the desirable consequences were greater than the undesirable consequences.

## Subgroup considerations

## Implementation considerations

## Monitoring and evaluation

## Research priorities

Diagnostic test accuracy for RIPA

### APPENDIX

#### 1. Risk of bias:

| Author | Risk of bias population selection | Risk of bias index test | Risk of bias reference test | Flow and timing risk of bias |
|--------|-----------------------------------|-------------------------|-----------------------------|------------------------------|
|--------|-----------------------------------|-------------------------|-----------------------------|------------------------------|

|                 |      |      |      |     |
|-----------------|------|------|------|-----|
| Woods, 2017     | High | Low  | Low  | Low |
| Borras, 2017    | Low  | Low  | High | Low |
| Veyradier, 2016 | High | Low  | High | Low |
| Shen, 2016      | Low  | High | Low  | Low |
| Batlle, 2016    | Low  | Low  | High | Low |
| Laderas, 2015   | Low  | High | High | Low |
| Kaur, 2014      | High | High | High | Low |
| Hamilton, 2011  | High | High | Low  | Low |
| Federici, 2009  | High | Low  | Low  | Low |
| Caron, 2006     | High | Low  | Low  | Low |
| Facey, 2000     | High | Low  | Low  | Low |
| Casana, 1998    | High | High | Low  | Low |
| Wood, 1996      | Low  | Low  | High | Low |
| Cooney, 1991    | High | Low  | High | Low |

## 2. Outcomes:

### ➤ Identified mutations:

| Studies         | Mutations Identified                                                                                                       |
|-----------------|----------------------------------------------------------------------------------------------------------------------------|
| Freitas, 2019   | Arg1341Gln, Arg1308Cys and Pro1266Leu                                                                                      |
| Woods, 2017     | p.Y1258C, p.P1266L, p.M1304V, p.R1306W, p.R1308C, p.S1310F, p.V1316M                                                       |
| Borras, 2017    | p.Arg1306Trp, p.Arg1308Arg, p.Val1316Met, p.Pro1266Leu and p.Pro1266Gln, p.Arg1306Gln                                      |
| Veyradier, 2016 | M1304dup, R1306Q/P/W, R1308C, I1309V, S1310F/P, V1316M, P1337L, R1341L/Q/W, I1372S, L1360F/P, A1461V, P1266L/Q, H1268D/N/Q |
| Shen, 2016      | p.Arg1306Trp, p.Val1316Met and p.Arg1308Cys                                                                                |
| Batlle, 2016    | p.Arg1308Cys, p.Arg1306Trp, p.Val1316Met, p.Pro1266Leu, p.Arg1306Gln, p.Pro1266Gln                                         |
| Laderas, 2015   | p.R1306Q, p.R1306W, p.R1308C, p.R1315H and p.R1341Q                                                                        |
| Kaur, 2014      | Arg1341Gln, His1268Asn, Val1316Met, Arg1306Trp                                                                             |
| Federici, 2009  | P1266Q/L, H1268D, R1306W, R1308C/L, I1309V, V1316M, P1337L, R1341Q/W                                                       |
| Caron, 2006     | H1268D, R1306W, R1306Q, R1306L, R1308C, V1316M, R1341Q and A1461V                                                          |

|              |                                                |
|--------------|------------------------------------------------|
| Facey, 2000  | Arg543Trp, Arg545Cys, Arg543Leu                |
| Casana, 1998 | R1308C, V1316M, P1337L, R1306W, R1341W         |
| Wood, 1996   | Arg543Trp, Val553Met, Ser547Phe, Arg578Gln     |
| Cooney, 1991 | Arg543Trp, Arg545Cys, Val553Met, and Arg578Gln |



- *Phenotype genotype correlations:* The correlation between genotype and phenotype was assessed by experts from central laboratories who contrasted the results of the phenotypic test panel and the genetic analysis on the basis of the effect and localization of mutations and previous descriptions in the literature and/or databases.

| Author, year    | RIPA | Genotype | Frequency/Sensitivity |
|-----------------|------|----------|-----------------------|
| Borras, 2017    | 12   | 35       | 34%                   |
| Veyradier, 2016 | 112  | 112      | 100%                  |
| Laderas, 2015   | 3    | 5        | 60%                   |
| Federici, 2009  | 67   | 67       | 100%                  |
| Caron, 2006     | 31   | 31       | 100%                  |
| Facey, 2000     | 13   | 13       | 100%                  |
| Wood, 1996      | 7    | 7        | 100%                  |

| Genetic testing |                             | RIPA        |                             |
|-----------------|-----------------------------|-------------|-----------------------------|
| Sensitivity     | 1.00 (95% CI: 1.00 to 1.00) | Sensitivity | 0.99 (95% CI: 0.60 to 1.00) |

| Prevalences | 1% | 50% |
|-------------|----|-----|
|             |    |     |

| Outcome                                                                               | No of studies (No of patients) | Study design                       | Factors that may decrease certainty of evidence |              |               |             |                  | Effect per 1,000 patients tested        |                                      |                                          |                  | Test accuracy CoE |
|---------------------------------------------------------------------------------------|--------------------------------|------------------------------------|-------------------------------------------------|--------------|---------------|-------------|------------------|-----------------------------------------|--------------------------------------|------------------------------------------|------------------|-------------------|
|                                                                                       |                                |                                    | Risk of bias                                    | Indirectness | Inconsistency | Imprecision | Publication bias | pre-test probability of 1% <sup>b</sup> |                                      | pre-test probability of 50% <sup>c</sup> |                  |                   |
|                                                                                       |                                |                                    |                                                 |              |               |             |                  | Genetic testing                         | RIPA                                 | Genetic testing                          | RIPA             |                   |
| <b>True positives</b><br>(patients with VWD type 2B)                                  | 9 studies<br>296 patients      | cohort & case-control type studies | very serious <sup>a</sup>                       | not serious  | not serious   | not serious | none             | 10 (10 to 10)                           | 10 (6 to 10)                         | 500 (500 to 500)                         | 495 (300 to 500) | ⊕⊕○○<br>LOW       |
| <b>0 fewer TP in Genetic testing</b>                                                  |                                |                                    |                                                 |              |               |             |                  | <b>5 more TP in Genetic testing</b>     |                                      |                                          |                  |                   |
| 0 (0 to 0)                                                                            |                                |                                    |                                                 |              |               |             |                  | 0 (0 to 4)                              | 0 (0 to 0)                           | 5 (0 to 200)                             |                  |                   |
| <b>False negatives</b><br>(patients incorrectly classified as not having VWD type 2B) |                                |                                    |                                                 |              |               |             |                  | <b>0 fewer FN in Genetic testing</b>    | <b>5 fewer FN in Genetic testing</b> |                                          |                  |                   |

*Explanations*

- a. Serious study population bias because of Case-Control design, and serious reference standard and/or index test bias in 9 studies
- b. Typically seen in patients investigated for VWD because of a personal history of abnormal laboratory test (e.g., increased PTT).
- c. Typically seen in patients investigated for VWD as a first degree relative for a patient with VWD type 2N.

| Studies         | Correlation                                                                                                                                                                                                                                                                                                                                                                                                                                                                                                                                                                                                                                                                                                                                                                                                                                                                                                                                                                                                                                                                                                          |
|-----------------|----------------------------------------------------------------------------------------------------------------------------------------------------------------------------------------------------------------------------------------------------------------------------------------------------------------------------------------------------------------------------------------------------------------------------------------------------------------------------------------------------------------------------------------------------------------------------------------------------------------------------------------------------------------------------------------------------------------------------------------------------------------------------------------------------------------------------------------------------------------------------------------------------------------------------------------------------------------------------------------------------------------------------------------------------------------------------------------------------------------------|
| Woods, 2017     | <p>p.P1266L, 100% at 0.4 mg/ml</p> <p>p.M1304V, 66.6% at 0.5 and 33.4% at 0.4</p> <p>p.R1306W, 20% at 0.6, 0.5, 0.4 and 40% at 0.3</p> <p>p.R1308C, 25% at 0.7, 50% at 0.6, 12.5% at 0.4, 12.5% at 0.2</p> <p>p.S1310F, 33.3% at 0.7 and 66.6% at 0.4</p> <p>p.V1316M, 10% at 0.7, 0.6, 0.3, and 50% at 0.5, and 20% at 0.2</p> <p>p.Y1258C, 100% at 0.3</p>                                                                                                                                                                                                                                                                                                                                                                                                                                                                                                                                                                                                                                                                                                                                                         |
| Borras, 2017    | <ul style="list-style-type: none"> <li>- 35 patients were diagnosed as having type 2B VWD by molecular diagnosis.</li> <li>- A good phenotype-genotype correlation could be established <b>for all patients</b>, as most showed a loss of high- molecular-weight multimers and discordance between VWF:Ag and VWF:RCo levels (mean ratio=0.51; range 0.19-1.1) and a classical type 2B mutation.</li> </ul>                                                                                                                                                                                                                                                                                                                                                                                                                                                                                                                                                                                                                                                                                                          |
| Veyradier, 2016 | 100% correlation for 112 (17%) that exhibited type 2B VWD including 95 patients with a “classical” type 2B and 17 patients with a type 2B “New York”                                                                                                                                                                                                                                                                                                                                                                                                                                                                                                                                                                                                                                                                                                                                                                                                                                                                                                                                                                 |
| Batlle, 2016    | <ul style="list-style-type: none"> <li>- 35 patients were diagnosed as having type 2B VWD by molecular diagnosis.</li> <li>- A good phenotype-genotype correlation could be established for all patients, as most showed a loss of high- molecular-weight multimers and discordance between VWF:Ag and VWF:RCo levels (mean ratio=0.51; range 0.19-1.1) and a classical type 2B mutation.</li> </ul>                                                                                                                                                                                                                                                                                                                                                                                                                                                                                                                                                                                                                                                                                                                 |
| Laderas, 2015   | RIPA was positive in 3 of 5 mutations identified p.R1306Q, p.R1306W, and p.R1308C                                                                                                                                                                                                                                                                                                                                                                                                                                                                                                                                                                                                                                                                                                                                                                                                                                                                                                                                                                                                                                    |
| Hamilton, 2011  | <p>48/110 had A1 domain mutations consistent with type 2B VWD. Seventeen cases carried platelet GP1BA mutations consistent with PT-VWD.</p> <p>In both the Australian and UK cases, apart from normal family members, there has not been any case where the phenotypic diagnosis has not matched the genotype finding, and ultimately making either a correct type 2B VWD, or its alternative PT-VWD, diagnosis possible.</p> <p>In Brazil, RIPA was performed in 14/18 cases, showing an enhanced response in 12, yet genetic analysis identified 2B VWD mutations in only three cases.</p> <p>In Canada, Apart from two normal family members, 9/40 were mutation negative for both VWF and GP1BA and only two cases showed GP1BA mutations.</p> <p>In the three cases from Switzerland, the 2B VWD phenotype matched the genetic analysis identifying known 2B VWD mutations.</p> <p>In Sweden, one case had a VWF mutation R1308P coinciding with 2B VWD and enhanced RIPA, but both parents of this index cases were completely normal, both phenotypically and genotypically with respect to the VWF gene.</p> |
| Federici, 2009  | All mutations were captured at a mean RIPA concentration of 0.6 (0.3-0.8)                                                                                                                                                                                                                                                                                                                                                                                                                                                                                                                                                                                                                                                                                                                                                                                                                                                                                                                                                                                                                                            |

|              |                                                                                                                                                                                                                                                                                 |
|--------------|---------------------------------------------------------------------------------------------------------------------------------------------------------------------------------------------------------------------------------------------------------------------------------|
| Caron, 2006  | All 31 cases displayed a positive RIPA at 0.5 mg/ml ristocetin concentration.                                                                                                                                                                                                   |
| Facey, 2000  | In all cases, RIPA occurred at concentrations of 0.5 mg/ml of ristocetin, while in one individual it occurred at 0.25 mg/ml of ristocetin. The RIPA results demonstrated increased platelet sensitivity to reduced levels of ristocetin, a finding consistent with type 2B VWD. |
| Wood, 1996   | RIPA was increased in all 7 patients studied, but the concentration is not indicated in the study.                                                                                                                                                                              |
| Cooney, 1991 | All mutations were captured were captured as patients had enhanced RIPA at a low concentration of ristocetin (0.2-0.6mg/ml)                                                                                                                                                     |

### References

1. Woods AI, Kempfer, A. C., Paiva, J., Sanchez-Luceros, A., Bermejo, E., Chuit, R., Alberto, M. F., Blanco, A. N., Lazzari, M. A. Phenotypic Parameters in Genotypically Selected Type 2B von Willebrand Disease Patients: A Large, Single-Center Experience Including a New Novel Mutation. *Seminars in Thrombosis and Hemostasis*. 2017;43(1):092-100.
2. Borrás B, J., Perez-Rodriguez, A., Lopez-Fernandez, M. F., Rodriguez-Trillo, A., Loures, E., Cid, A. R., Bonanad, S., Cabrera, N., Moret, A., Parra, R., Mingot-Castellano, M. E., Balda, I., Altisent, C., Perez-Montes, R., Fisac, R. M., Iruin, G., Herrero, S., Soto, I., De Rueda, B., Jimenez-Yuste, V., Alonso, N., Vilarino, D., Arija, O., Campos, R., Paloma, M. J., Bermejo, N., Berruenco, R., Mateo, J., Arribalzaga, K., Marco, P., Palomo, A., Sarmiento, L., Inigo, B., Nieto, M. M., Vidal, R., Martinez, M. P., Aguinaco, R., Cesar, J. M., Ferreiro, M., Garcia-Frade, J., Rodriguez-Huerta, A. M., Cuesta, J., Rodriguez-Gonzalez, R., Garcia-Candel, F., Cornudella, R., Aguilar, C., Vidal, F., Corrales, I. Molecular and clinical profile of von willebrand disease in Spain (PCM-EVW-ES): Comprehensive genetic analysis by next-generation sequencing of 480 patients. *Haematologica*. 2017 Dec;102(12):2005-2014.
3. Veyradier A, Boisseau P., Fressinaud, E., Caron, C., Ternisien, C., Giraud, M., Zawadzki, C., Trossaert, M., Itzhar-Baikian, N., Dreyfus, M., d'Oiron, R., Borel-Derlon, A., Susen, S., Bezieau, S., Denis, C. V., Goudemand, J., French Reference Center for von Willebrand, disease. A Laboratory Phenotype/Genotype Correlation of 1167 French Patients From 670 Families With von Willebrand Disease: A New Epidemiologic Picture. *Medicine (Baltimore)*. 2016;95(11):e3038.
4. Shen MC, Chen, M., Ma, G. C., Chang, S. P., Lin, C. Y., Lin, B. D., Hsieh, H. N. De novo mutation and somatic mosaicism of gene mutation in type 2A, 2B and 2M VWD. *Thrombosis Journal*. 2016;14 (Supplement 1) (no pagination)(36).
5. Batlle J, Perez-Rodriguez, A., Corrales, I., Lopez-Fernandez, M. F., Rodriguez-Trillo, A., Loures, E., Cid, A. R., Bonanad, S., Cabrera, N., Moret, A., Parra, R., Mingot-Castellano, M. E., Balda, I., Altisent, C., Perez-Montes, R., Fisac, R. M., Iruin, G., Herrero, S., Soto, I., De Rueda, B., Jimenez-Yuste, V., Alonso, N., Vilarino, D., Arija, O., Campos, R., Paloma, M. J., Bermejo, N., Toll, T., Mateo, J., Arribalzaga, K., Marco, P., Palomo, A., Sarmiento, L., Inigo, B., Del Mar Nieto, M., Vidal, R., Martinez, M. P., Aguinaco, R., Cesar, J. M., Ferreiro, M., Garcia-Frade, J., Rodriguez-Huerta, A. M., Cuesta, J., Rodriguez-Gonzalez, R., Garcia-Candel, F., Cornudella, R., Aguilar, C., Borrás, N., Vidal, F. Molecular and clinical profile of von willebrand disease in Spain (PCM-EVW-ES): Proposal for a new diagnostic paradigm. *Thrombosis and Haemostasis*. 2016;115(1):40-50.
6. Alvarez-Laderas I, Nunez, R., Jimenez-Barcenás, R., Rodriguez Martorell, F. J., Garcia-Lozano, J. R., de Cos, C., Perez Garrido, R. The spectrum of mutations in Southern Spanish patients with von Willebrand disease. *Haemophilia*. 2015;21(3):e240-242.
7. Kaur H, Ozelo, M., Scovil, S., James, P. D., Othman, M. Systematic analysis of bleeding phenotype in PT-VWD compared to type 2B VWD using an electronic bleeding questionnaire. *Clinical and Applied Thrombosis/Hemostasis*. 2014;20(8):765-771.
8. Hamilton A, Ozelo M, Leggo J, et al. Frequency of platelet type versus type 2B von Willebrand disease. An international registry-based study. *Thromb Haemost*. 2011;105(3):501-508.
9. Federici AB, Mannucci, P. M., Castaman, G., Baronciani, L., Bucciarelli, P., Canciani, M. T., Pecci, A., Lenting, P. J., De Groot, P. G. Clinical and molecular predictors of thrombocytopenia and risk of bleeding in patients with von Willebrand disease type 2B: a cohort study of 67 patients. *Blood*. 2009;113(3):526-534.

10. Facey DA, Favalaro EJ, Maxwell E, Baker R, Hertzberg MS. Type 2B von Willebrand's disease in thirteen individuals from five unrelated Australian families: Phenotype and genotype correlations. *Am J Hematol.* 2000;63(4):197-199.
11. Casana P, Martinez, F., Espinos, C., Haya, S., Lorenzo, J. I., Aznar, J. A. Search for mutations in a segment of the exon 28 of the human von Willebrand factor gene: New mutations, R1315C and R1341W, associated with type 2M and 2B variants. *Am J Hematol.* 1998;59(1):57-63.
12. Wood N, Standen, G. R., Bowen, D. J., Cumming, A., Lush, C., Lee, R., Bidwell, J. UHG-based mutation screening in type 2B von Willebrand's disease: Detection of a candidate mutation Ser547Phe. *Thrombosis and Haemostasis.* 1996;75(2):363-367.
13. Scott JP, Montgomery, R. R. The rapid differentiation of type IIb von Willebrand's disease from platelet-type (pseudo-) von Willebrand's disease by the "neutral" monoclonal antibody binding assay. *American Journal of Clinical Pathology.* 1991;96(6):723-728.
14. Cooney KA, Nichols, W. C., Bruck, M. E., Bahou, W. F., Shapiro, A. D., Bowie, E. J. W., Gralnick, H. R., Ginsburg, D. The molecular defect in type IIB von Willebrand disease: Identification of four potential missense mutations within the putative Gplb binding domain. *Journal of Clinical Investigation.* 1991;87(4):1227-1233.
15. Caron C, Hilbert, L., Vanhoorelbeke, K., Deckmyn, H., Goudemand, J., Mazurier, C. Measurement of von Willebrand factor binding to a recombinant fragment of glycoprotein Ibalpha in an enzyme-linked immunosorbent assay-based method: Performances in patients with type 2B von Willebrand disease. *Br J Haematol.* 2006;133(6):655-663.
16. Freitas SDS, Rezende SM, de Oliveira LC, et al. Genetic variants of VWF gene in type 2 von Willebrand disease. *Haemophilia.* 2019;25(2):e78-e85.

## Question 10

| Should genetic testing vs. FVIII:VWF binding be used to diagnose VWD type 2N in patients suspected of VWD type 2N? |                                                                                                                                                                                                                                                                                                                                                                                                                                                                                                                                                                                                                                                                                                                                                                                                                                                                                                                                                                                                                                                                                                                                                                                                                                                                                                                                                                                                                                                                                                                                                                                                                                                                                                                                                                                                                                                                                                                                                                                                                                                                                                                                                                                                 |
|--------------------------------------------------------------------------------------------------------------------|-------------------------------------------------------------------------------------------------------------------------------------------------------------------------------------------------------------------------------------------------------------------------------------------------------------------------------------------------------------------------------------------------------------------------------------------------------------------------------------------------------------------------------------------------------------------------------------------------------------------------------------------------------------------------------------------------------------------------------------------------------------------------------------------------------------------------------------------------------------------------------------------------------------------------------------------------------------------------------------------------------------------------------------------------------------------------------------------------------------------------------------------------------------------------------------------------------------------------------------------------------------------------------------------------------------------------------------------------------------------------------------------------------------------------------------------------------------------------------------------------------------------------------------------------------------------------------------------------------------------------------------------------------------------------------------------------------------------------------------------------------------------------------------------------------------------------------------------------------------------------------------------------------------------------------------------------------------------------------------------------------------------------------------------------------------------------------------------------------------------------------------------------------------------------------------------------|
| <b>POPULATION:</b>                                                                                                 | Patients suspected of VWD type 2N                                                                                                                                                                                                                                                                                                                                                                                                                                                                                                                                                                                                                                                                                                                                                                                                                                                                                                                                                                                                                                                                                                                                                                                                                                                                                                                                                                                                                                                                                                                                                                                                                                                                                                                                                                                                                                                                                                                                                                                                                                                                                                                                                               |
| <b>INTERVENTION:</b>                                                                                               | Genetic testing                                                                                                                                                                                                                                                                                                                                                                                                                                                                                                                                                                                                                                                                                                                                                                                                                                                                                                                                                                                                                                                                                                                                                                                                                                                                                                                                                                                                                                                                                                                                                                                                                                                                                                                                                                                                                                                                                                                                                                                                                                                                                                                                                                                 |
| <b>COMPARISON:</b>                                                                                                 | FVIII:VWF binding                                                                                                                                                                                                                                                                                                                                                                                                                                                                                                                                                                                                                                                                                                                                                                                                                                                                                                                                                                                                                                                                                                                                                                                                                                                                                                                                                                                                                                                                                                                                                                                                                                                                                                                                                                                                                                                                                                                                                                                                                                                                                                                                                                               |
| <b>PURPOSE OF THE TEST:</b>                                                                                        | Identify VWD type 2N patients                                                                                                                                                                                                                                                                                                                                                                                                                                                                                                                                                                                                                                                                                                                                                                                                                                                                                                                                                                                                                                                                                                                                                                                                                                                                                                                                                                                                                                                                                                                                                                                                                                                                                                                                                                                                                                                                                                                                                                                                                                                                                                                                                                   |
| <b>ROLE OF THE TEST:</b>                                                                                           | Identify VWD type 2N patients                                                                                                                                                                                                                                                                                                                                                                                                                                                                                                                                                                                                                                                                                                                                                                                                                                                                                                                                                                                                                                                                                                                                                                                                                                                                                                                                                                                                                                                                                                                                                                                                                                                                                                                                                                                                                                                                                                                                                                                                                                                                                                                                                                   |
| <b>LINKED TREATMENTS:</b>                                                                                          | Tranexemic acid, factor replacement                                                                                                                                                                                                                                                                                                                                                                                                                                                                                                                                                                                                                                                                                                                                                                                                                                                                                                                                                                                                                                                                                                                                                                                                                                                                                                                                                                                                                                                                                                                                                                                                                                                                                                                                                                                                                                                                                                                                                                                                                                                                                                                                                             |
| <b>ANTICIPATED OUTCOMES:</b>                                                                                       | VWF:FVIII – False positive, VWF:FVIII– False negative, VWF:FVIII – True positive, VWF:FVIII – True negative<br>Major bleeding, transfusion and treatment, blood loss, gastrointestinal bleeding, symptom severity, minor bleeding, mortality.                                                                                                                                                                                                                                                                                                                                                                                                                                                                                                                                                                                                                                                                                                                                                                                                                                                                                                                                                                                                                                                                                                                                                                                                                                                                                                                                                                                                                                                                                                                                                                                                                                                                                                                                                                                                                                                                                                                                                   |
| <b>SETTING:</b>                                                                                                    | Outpatient                                                                                                                                                                                                                                                                                                                                                                                                                                                                                                                                                                                                                                                                                                                                                                                                                                                                                                                                                                                                                                                                                                                                                                                                                                                                                                                                                                                                                                                                                                                                                                                                                                                                                                                                                                                                                                                                                                                                                                                                                                                                                                                                                                                      |
| <b>PERSPECTIVE:</b>                                                                                                | Clinical recommendation – population perspective                                                                                                                                                                                                                                                                                                                                                                                                                                                                                                                                                                                                                                                                                                                                                                                                                                                                                                                                                                                                                                                                                                                                                                                                                                                                                                                                                                                                                                                                                                                                                                                                                                                                                                                                                                                                                                                                                                                                                                                                                                                                                                                                                |
| <b>BACKGROUND:</b>                                                                                                 | <p>Von Willebrand disease (VWD) is the most common inherited bleeding disorder known in humans: while estimated to affect between 0.1 and 1% of the general population, many are never diagnosed. VWD diagnosis and classification require numerous laboratory tests. (Pathare, 2018). Type 2 VWD accounts for 25% of cases and results from the expression of a functionally abnormal VWF molecule (Lavin 2017). Diagnosis and classification of VWD require correlation between clinical findings and laboratory results. Recommended initial laboratory tests include measurements of plasma VWF antigen (VWF:Ag), VWF-platelet GP Ib binding activity (e.g. VWF:RCo) and FVIII:C (Chenn, 2011). The ratio of VWF:RCo/VWF:Ag is used to distinguish type 2 from other VWD types. More tests like multimer analysis, RIPA, genetic testing and VWF:FVIII are used to characterize the subtypes of the disease.</p> <p>Type 2N von Willebrand disease is a rare subtype of VWD in which a mutation (mostly in exons 18-20) of the VWF gene leads to impaired binding of the VWF molecule to FVIII, and consequent shortened half-life of FVIII. Routine laboratory assays will show reduced FVIII levels, but normal VWF, mimicking a diagnosis of haemophilia A. Differences in the clinical approach to management of patients with type 2N VWD and Haemophilia A, together with the implications for genetic counselling for this autosomal defect, reinforce the need to differentiate these disorders with reliable FVIII binding assays (Jennings, 2015).</p> <p>Sometimes, different workers ascribe the same mutation to differing types of VWD, and different types of VWD will seemingly arise from mutations in close proximity on the VWF gene. Genetic testing for VWD is not fool-proof, is likely to be very costly, and has not as yet been shown to be cost-effective in the diagnostic setting. VWD can arise from genetic events unrelated to the VWF gene, and the expression of VWF and the clinical severity in individual patients can be influenced by several epigenetic events. Most of these additional complexities currently remain unknown (Favaloro, 2008).</p> |
| <b>SUBGROUPS:</b>                                                                                                  |                                                                                                                                                                                                                                                                                                                                                                                                                                                                                                                                                                                                                                                                                                                                                                                                                                                                                                                                                                                                                                                                                                                                                                                                                                                                                                                                                                                                                                                                                                                                                                                                                                                                                                                                                                                                                                                                                                                                                                                                                                                                                                                                                                                                 |

**CONFLICT OF INTERESTS:**

ASH conflict of interest declaration and management policies were applied, and the following panel members were voting panel members (determining the direction and strength of the recommendation): Sandra Haberichter, Jeroen Eikenboom, Barbara Konkle, Robert Sidonio Jr, Simon McRae, Robert Montgomery, James O'Donnell, Claire McLintock, Barbara Ameer, Nicolas Giraud, Nikole Scappe, Vicki Jacobs-Pratt, Paula James, Nathan Connell.

No panel members recused as a result of risk of conflicts of interest.

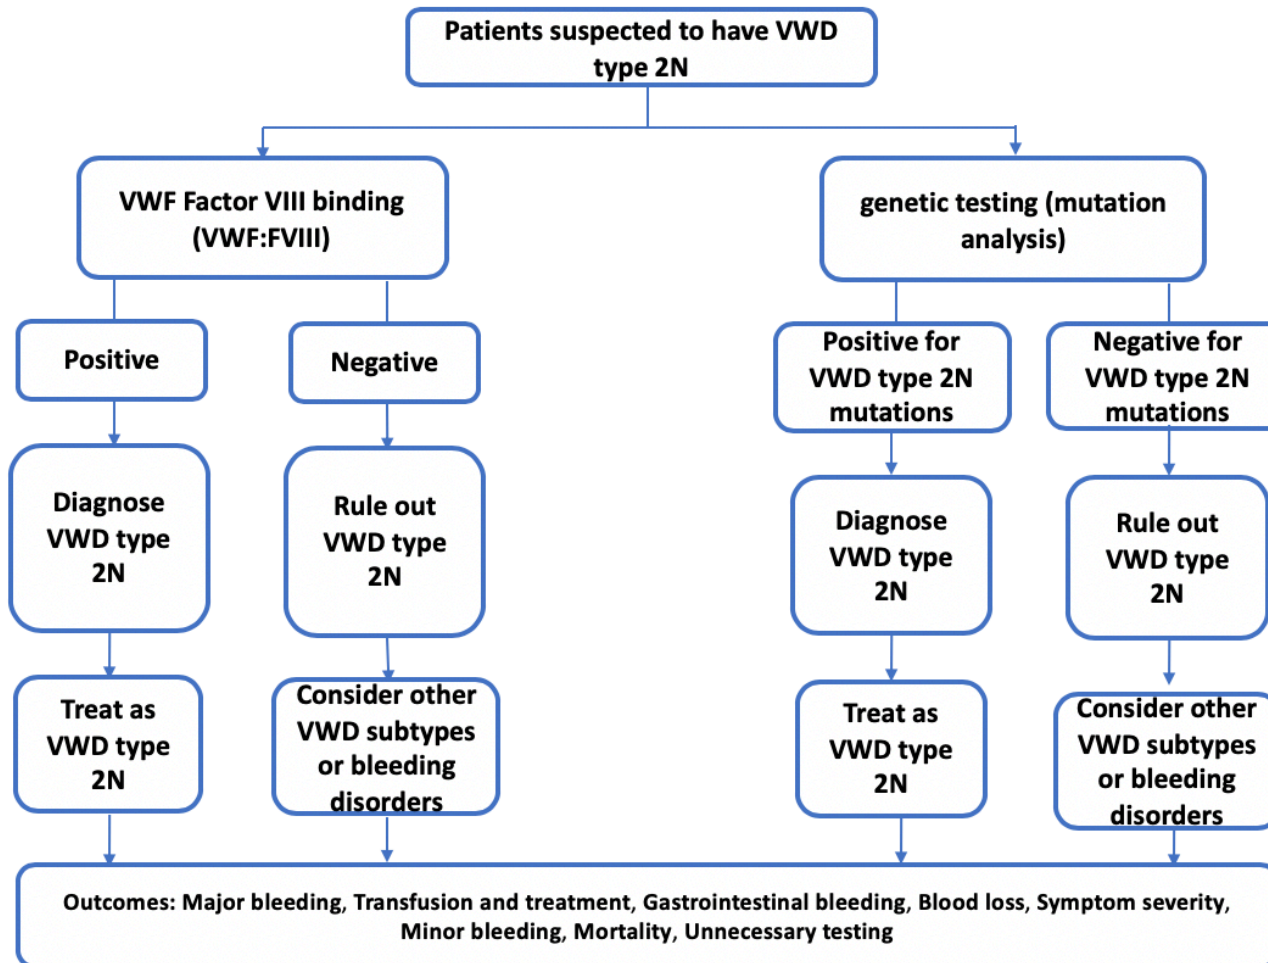

**ASSESSMENT****Problem**  
Is the problem a priority?

| <b>JUDGEMENT</b>                                                                                                                                                                                                                                                                                | <b>RESEARCH EVIDENCE</b>                                                                                                                                                                                                                                                                                                                                                                                                                                                                                                                                                                                                                                                                                                                                                                                                                                                                                                                                                                                                                                                                                                                                                                                                                                                                                                                                                   | <b>ADDITIONAL CONSIDERATIONS</b>                                                                                |
|-------------------------------------------------------------------------------------------------------------------------------------------------------------------------------------------------------------------------------------------------------------------------------------------------|----------------------------------------------------------------------------------------------------------------------------------------------------------------------------------------------------------------------------------------------------------------------------------------------------------------------------------------------------------------------------------------------------------------------------------------------------------------------------------------------------------------------------------------------------------------------------------------------------------------------------------------------------------------------------------------------------------------------------------------------------------------------------------------------------------------------------------------------------------------------------------------------------------------------------------------------------------------------------------------------------------------------------------------------------------------------------------------------------------------------------------------------------------------------------------------------------------------------------------------------------------------------------------------------------------------------------------------------------------------------------|-----------------------------------------------------------------------------------------------------------------|
| <ul style="list-style-type: none"> <li><input type="radio"/> No</li> <li><input type="radio"/> Probably no</li> <li><input type="radio"/> Probably yes</li> <li><input checked="" type="radio"/> Yes</li> <li><input type="radio"/> Varies</li> <li><input type="radio"/> Don't know</li> </ul> | <p>Von Willebrand disease (VWD) is the most common inherited bleeding disorder known in humans: while estimated to affect between 0.1 and 1% of the general population, many are never diagnosed. VWD diagnosis and classification require numerous laboratory tests. (Pathare, 2018). Type 2 VWD accounts for 25% of cases and results from the expression of a functionally abnormal VWF molecule (Lavin 2017). Diagnosis and classification of VWD require correlation between clinical findings and laboratory results. Recommended initial laboratory tests include measurements of plasma VWF antigen (VWF:Ag), VWF-platelet GP Ib binding activity (e.g. VWF:RCo) and FVIII:C (Chenn, 2011).</p> <p>Type 2N von Willebrand disease is a rare subtype of VWD in which a mutation (mostly in exons 18-20) of the VWF gene leads to impaired binding of the VWF molecule to FVIII, and consequent shortened half-life of FVIII. Routine laboratory assays will show reduced FVIII levels, but normal VWF (or low), potentially mimicking a diagnosis of hemophilia A. Differences in the clinical approach to management of patients with type 2N VWD and Haemophilia A, together with the implications for genetic counseling for this autosomal defect, reinforce the need to differentiate these disorders with reliable FVIII binding assays (Jennings, 2015).</p> | <p>This question was judged to be a priority among many candidate questions to address in these guidelines.</p> |

**Test accuracy**  
How accurate is the test?

| <b>JUDGEMENT</b>                                                                                                                                                                                                                                                                                                  | <b>RESEARCH EVIDENCE</b>                                                                                                                                                                                                                                                                                                                                                          | <b>ADDITIONAL CONSIDERATIONS</b> |
|-------------------------------------------------------------------------------------------------------------------------------------------------------------------------------------------------------------------------------------------------------------------------------------------------------------------|-----------------------------------------------------------------------------------------------------------------------------------------------------------------------------------------------------------------------------------------------------------------------------------------------------------------------------------------------------------------------------------|----------------------------------|
| <ul style="list-style-type: none"> <li><input type="radio"/> Very inaccurate</li> <li><input type="radio"/> Inaccurate</li> <li><input type="radio"/> Accurate</li> <li><input type="radio"/> Very accurate</li> <li><input type="radio"/> Varies</li> <li><input checked="" type="radio"/> Don't know</li> </ul> | <p>There is not test accuracy results due to the lack of agreed-on reference standard for type 2N VWD.</p> <p>In all studies, homozygous type 2N VWD patients had binding ratios &lt;0.12, heterozygous carriers had intermediate binding ratios of 0.44–0.61, and healthy control subjects had ratios of 0.73–1.42.</p> <p>Refer to the Appendix at the end of the document.</p> |                                  |

**Desirable Effects**  
How substantial are the desirable anticipated effects?

| <b>JUDGEMENT</b> | <b>RESEARCH EVIDENCE</b> | <b>ADDITIONAL CONSIDERATIONS</b> |
|------------------|--------------------------|----------------------------------|
|                  |                          |                                  |

|                                                                                                                                                           |                                                                                                                                                                                                                                                                                                                                                                                                                                                                                                                                                                                                                                                                                                                                                                                                                                                                                                                                                                                                                                                                                                                                                                                                                                                            |                                                      |
|-----------------------------------------------------------------------------------------------------------------------------------------------------------|------------------------------------------------------------------------------------------------------------------------------------------------------------------------------------------------------------------------------------------------------------------------------------------------------------------------------------------------------------------------------------------------------------------------------------------------------------------------------------------------------------------------------------------------------------------------------------------------------------------------------------------------------------------------------------------------------------------------------------------------------------------------------------------------------------------------------------------------------------------------------------------------------------------------------------------------------------------------------------------------------------------------------------------------------------------------------------------------------------------------------------------------------------------------------------------------------------------------------------------------------------|------------------------------------------------------|
| <ul style="list-style-type: none"> <li>○ Trivial</li> <li>○ Small</li> <li>○ Moderate</li> <li>○ Large</li> <li>○ Varies</li> <li>● Don't know</li> </ul> | <p><b>True Positive:</b> These are patients who have VWD type 2N, and who received preventive and appropriate treatment. They benefit from decreasing the risk of bleeding with treatment and they suffer the side effects of treatment.</p> <p><b>True Negative:</b> These are patients who did not have VWD type 2N, and who were correctly identified as not having the disease. They will appropriately not receive treatment for VWD type 2N, and not suffer the side effects of treatment, but may benefit from treatment for other bleeding disorders.</p> <p><b>False Negative:</b> These are patients who have VWD type 2N, but the diagnosis was missed and will be sent home without appropriate treatment. They face the risks of prolonged and heavy bleeding due to not receiving treatment. They will be considered for other bleeding disorders.</p> <p><b>False Positive:</b> These are patients who did not have VWD type 2N, but they will be labeled as having VWD type 2N and receive unnecessary treatment. They do not benefit from the treatment for type 2N. They may benefit from the treatment if they have other bleeding disorders, but they suffer side effects.</p> <p>Refer to the Appendix at the end of the document</p> | <p>Counseling.<br/>Picking up unknown mutations.</p> |
|-----------------------------------------------------------------------------------------------------------------------------------------------------------|------------------------------------------------------------------------------------------------------------------------------------------------------------------------------------------------------------------------------------------------------------------------------------------------------------------------------------------------------------------------------------------------------------------------------------------------------------------------------------------------------------------------------------------------------------------------------------------------------------------------------------------------------------------------------------------------------------------------------------------------------------------------------------------------------------------------------------------------------------------------------------------------------------------------------------------------------------------------------------------------------------------------------------------------------------------------------------------------------------------------------------------------------------------------------------------------------------------------------------------------------------|------------------------------------------------------|

### Undesirable Effects

How substantial are the undesirable anticipated effects?

| JUDGEMENT                                                                                                                                                 | RESEARCH EVIDENCE                                                                                                                                                                                                                                                                                                                                                                                                                                                                                                                                                                                                                                                                                                                                                                                                                                                                                                                                                                                                                                                                                                                                                                                  | ADDITIONAL CONSIDERATIONS                                                                                                                                                         |
|-----------------------------------------------------------------------------------------------------------------------------------------------------------|----------------------------------------------------------------------------------------------------------------------------------------------------------------------------------------------------------------------------------------------------------------------------------------------------------------------------------------------------------------------------------------------------------------------------------------------------------------------------------------------------------------------------------------------------------------------------------------------------------------------------------------------------------------------------------------------------------------------------------------------------------------------------------------------------------------------------------------------------------------------------------------------------------------------------------------------------------------------------------------------------------------------------------------------------------------------------------------------------------------------------------------------------------------------------------------------------|-----------------------------------------------------------------------------------------------------------------------------------------------------------------------------------|
| <ul style="list-style-type: none"> <li>○ Large</li> <li>○ Moderate</li> <li>○ Small</li> <li>○ Trivial</li> <li>○ Varies</li> <li>● Don't know</li> </ul> | <p><b>True Positive:</b> These are patients who have VWD type 2N, and who received preventive and appropriate treatment. They benefit from decreasing the risk of bleeding with treatment and they suffer the side effects of treatment.</p> <p><b>True Negative:</b> These are patients who did not have VWD type 2N, and who were correctly identified as not having the disease. They will appropriately not receive treatment for VWD type 2N, and not suffer the side effects of treatment, but may benefit from treatment for other bleeding disorders.</p> <p><b>False Negative:</b> These are patients who have VWD type 2N, but the diagnosis was missed and will be sent home without appropriate treatment. They face the risks of prolonged and heavy bleeding due to not receiving treatment. They will be considered for other bleeding disorders.</p> <p><b>False Positive:</b> These are patients who did not have VWD type 2N, but they will be labeled as having VWD type 2N and receive unnecessary treatment. They do not benefit from the treatment for type 2N. They may benefit from the treatment if they have other bleeding disorders, but they suffer side effects.</p> | <p>Missing the diagnosis in 2N.<br/>Serious implications for family counseling<br/>Serious implications on treatment; wrong ineffective treatment so the patients will bleed.</p> |



|  |                                                  |  |
|--|--------------------------------------------------|--|
|  | Refer to the Appendix at the end of the document |  |
|--|--------------------------------------------------|--|

**Certainty of the evidence of test accuracy**  
 What is the overall certainty of the evidence of test accuracy?

| JUDGEMENT                                                                                                                                      | RESEARCH EVIDENCE                                | ADDITIONAL CONSIDERATIONS                                                                                                                                                                                                                                                                                                                                                                                    |
|------------------------------------------------------------------------------------------------------------------------------------------------|--------------------------------------------------|--------------------------------------------------------------------------------------------------------------------------------------------------------------------------------------------------------------------------------------------------------------------------------------------------------------------------------------------------------------------------------------------------------------|
| <ul style="list-style-type: none"> <li>○ Very low</li> <li>○ Low</li> <li>○ Moderate</li> <li>○ High</li> <li>● No included studies</li> </ul> | Refer to the Appendix at the end of the document | <p>The reference standard was considered to be mutation analysis, however, sometimes the mutation captured was never defined as VWD type 2N, in that case the phenotype that is defined by binding deficiency needs to be done to identify type 2N. Some patients would have antibodies to VWF that prevents its binding to FVIII and those patients would have a positive VWF:FVIII but no VWD type 2N.</p> |

**Certainty of the evidence of test's effects**  
 What is the overall certainty of the evidence for any critical or important direct benefits, adverse effects or burden of the test?

| JUDGEMENT                                                                                                                                      | RESEARCH EVIDENCE | ADDITIONAL CONSIDERATIONS                                                                                                                                                                                                                                                                                                                                                                                                                                                                                                                                                                                              |
|------------------------------------------------------------------------------------------------------------------------------------------------|-------------------|------------------------------------------------------------------------------------------------------------------------------------------------------------------------------------------------------------------------------------------------------------------------------------------------------------------------------------------------------------------------------------------------------------------------------------------------------------------------------------------------------------------------------------------------------------------------------------------------------------------------|
| <ul style="list-style-type: none"> <li>○ Very low</li> <li>○ Low</li> <li>○ Moderate</li> <li>○ High</li> <li>● No included studies</li> </ul> |                   | <p>Genetic testing will help counseling patients and will help pick up other mutations. Given this condition is an autosomal recessive disease, counseling would be different than other subtypes. Doing only VWF:FVIII will indicate the presence of the type 2N phenotype, in that case the patient might be homozygous (meaning their child can only be heterozygous for type 2N), but the patient can also be heterozygous with the second allele indicating VWD type 1 (the child can have VWD type 1 in that case or be heterozygous for type 2N). Having said that, VWF:FVIII is not enough for counseling.</p> |

**Certainty of the evidence of management's effects**

What is the overall certainty of the evidence of effects of the management that is guided by the test results?

| JUDGEMENT                                                                                                                                      | RESEARCH EVIDENCE                                                                                                                                                                                                                                                                                                                                                                                                                                                  | ADDITIONAL CONSIDERATIONS |
|------------------------------------------------------------------------------------------------------------------------------------------------|--------------------------------------------------------------------------------------------------------------------------------------------------------------------------------------------------------------------------------------------------------------------------------------------------------------------------------------------------------------------------------------------------------------------------------------------------------------------|---------------------------|
| <ul style="list-style-type: none"> <li>○ Very low</li> <li>○ Low</li> <li>○ Moderate</li> <li>○ High</li> <li>● No included studies</li> </ul> | <p>While a clear-cut diagnosis is easy in severe von Willebrand factor reductions, the advantage of pursuing a definite diagnosis in mild or dubious cases should be weighed against the risk of over-medicalization. Identifying patients with VWD type 2 will help to give a treatment that will correct the dual defect of hemostasis caused by the abnormal/reduced von Willebrand factor and the concomitant deficiency of factor VIII. (Castaman, 2013).</p> |                           |

**Certainty of the evidence of test result/management**

How certain is the link between test results and management decisions?

| JUDGEMENT                                                                                                                                      | RESEARCH EVIDENCE | ADDITIONAL CONSIDERATIONS                                                                                                                                                                                                                                                                                                                                                                                      |
|------------------------------------------------------------------------------------------------------------------------------------------------|-------------------|----------------------------------------------------------------------------------------------------------------------------------------------------------------------------------------------------------------------------------------------------------------------------------------------------------------------------------------------------------------------------------------------------------------|
| <ul style="list-style-type: none"> <li>○ Very low</li> <li>○ Low</li> <li>○ Moderate</li> <li>○ High</li> <li>● No included studies</li> </ul> |                   | <p>If the choice of treatment is not desmopressin, the labeling will not have an effect. In fact, there is a limitation of using desmopressin in VWD type 2N because the levels of FVIII would drop quickly after administering the drug because the circulating VWF would not be carrying FVIII appropriately, that is why factor and tranexamic acid are more used in this particular group of patients.</p> |

**Certainty of effects**

What is the overall certainty of the evidence of effects of the test?

| JUDGEMENT                                                                                                                                      | RESEARCH EVIDENCE                                       | ADDITIONAL CONSIDERATIONS |
|------------------------------------------------------------------------------------------------------------------------------------------------|---------------------------------------------------------|---------------------------|
| <ul style="list-style-type: none"> <li>○ Very low</li> <li>● Low</li> <li>○ Moderate</li> <li>○ High</li> <li>○ No included studies</li> </ul> | <p>Refer to the Appendix at the end of the document</p> |                           |

**Values**

Is there important uncertainty about or variability in how much people value the main outcomes?

| JUDGEMENT | RESEARCH EVIDENCE | ADDITIONAL CONSIDERATIONS |
|-----------|-------------------|---------------------------|
|           |                   |                           |

|                                                                                                                                                                                                                                                                  |  |                                                                                                                                                                                                                                                                                                                                                                                                                                                                                                                                                                                                                                                                                                                                                                                                                                                                                                                                                                                                                                                                                                                                                                                                                                                                                                                                                                                                                                                                                                                                                                                                                                                          |
|------------------------------------------------------------------------------------------------------------------------------------------------------------------------------------------------------------------------------------------------------------------|--|----------------------------------------------------------------------------------------------------------------------------------------------------------------------------------------------------------------------------------------------------------------------------------------------------------------------------------------------------------------------------------------------------------------------------------------------------------------------------------------------------------------------------------------------------------------------------------------------------------------------------------------------------------------------------------------------------------------------------------------------------------------------------------------------------------------------------------------------------------------------------------------------------------------------------------------------------------------------------------------------------------------------------------------------------------------------------------------------------------------------------------------------------------------------------------------------------------------------------------------------------------------------------------------------------------------------------------------------------------------------------------------------------------------------------------------------------------------------------------------------------------------------------------------------------------------------------------------------------------------------------------------------------------|
| <ul style="list-style-type: none"> <li>● Important uncertainty or variability</li> <li>○ Possibly important uncertainty or variability</li> <li>○ Probably no important uncertainty or variability</li> <li>○ No important uncertainty or variability</li> </ul> |  | <p>Some individuals may be concerned regarding the impact of genetic testing on the determination of parentage (if family testing performed), along with normal privacy issues around genetic testing, as patients may have fears of what the sample may later be used to test for. Patients want to know that their genetic information is secure and anonymized. It is usually more complex to understand genetic testing. Anxiety might emerge for patients who have a mutation and information availability can impact other generations, who do not get consented in the process of diagnostic genetic testing.</p> <p>Patients want a test that is the most reliable. One concern is whether genetic testing will affect future ability to obtain health insurance (pre-existing condition) or life insurance if they have no bleeding disorder but had a genetic mutation identified.</p> <p>On the other hand, some patients find it very rewarding to know if they have a VWF mutation, especially when taking part in a study that would be published and help others.</p> <p>Patients are very familiar with having blood drawn for lab testing for any reason. Well-trained phlebotomists at blood disorder treatment centers are efficient and have a good technique which means little or no bruising from blood draws for specialized hematology laboratory tests. Patients care to have assays that can be trusted that will lead to an accurate diagnosis and don't have to be repeated on multiple occasions. So, patient concerns or preferences that are specific to VWF:FVIII binding are not different than other blood tests.</p> |
|------------------------------------------------------------------------------------------------------------------------------------------------------------------------------------------------------------------------------------------------------------------|--|----------------------------------------------------------------------------------------------------------------------------------------------------------------------------------------------------------------------------------------------------------------------------------------------------------------------------------------------------------------------------------------------------------------------------------------------------------------------------------------------------------------------------------------------------------------------------------------------------------------------------------------------------------------------------------------------------------------------------------------------------------------------------------------------------------------------------------------------------------------------------------------------------------------------------------------------------------------------------------------------------------------------------------------------------------------------------------------------------------------------------------------------------------------------------------------------------------------------------------------------------------------------------------------------------------------------------------------------------------------------------------------------------------------------------------------------------------------------------------------------------------------------------------------------------------------------------------------------------------------------------------------------------------|

**Balance of effects**  
Does the balance between desirable and undesirable effects favor the intervention or the comparison?

|                  |                          |                                  |
|------------------|--------------------------|----------------------------------|
| <b>JUDGEMENT</b> | <b>RESEARCH EVIDENCE</b> | <b>ADDITIONAL CONSIDERATIONS</b> |
|------------------|--------------------------|----------------------------------|

|                                                                                                                                                                                                                                                                                                                |                                                         |                                                                                                                                                                                                                      |
|----------------------------------------------------------------------------------------------------------------------------------------------------------------------------------------------------------------------------------------------------------------------------------------------------------------|---------------------------------------------------------|----------------------------------------------------------------------------------------------------------------------------------------------------------------------------------------------------------------------|
| <ul style="list-style-type: none"> <li>○ Favors the comparison</li> <li>○ Probably favors the comparison</li> <li>● Does not favor either the intervention or the comparison</li> <li>○ Probably favors the intervention</li> <li>○ Favors the intervention</li> <li>○ Varies</li> <li>○ Don't know</li> </ul> | <p>Refer to the Appendix at the end of the document</p> | <p>The panel agreed that these tests can be complimentary: FVIII:VWF is a straightforward laboratory test, however genetic counseling is better when doing genetic testing as opposed to the phenotypic testing.</p> |
|----------------------------------------------------------------------------------------------------------------------------------------------------------------------------------------------------------------------------------------------------------------------------------------------------------------|---------------------------------------------------------|----------------------------------------------------------------------------------------------------------------------------------------------------------------------------------------------------------------------|

### Resources required

How large are the resource requirements (costs)?

| JUDGEMENT                                                                                                                                                                                                                      | RESEARCH EVIDENCE                                                                                                                                                                                                                                                                                                                                                                                                                                                                                                                                                                                                                                                                                                                                  | ADDITIONAL CONSIDERATIONS |           |                 |           |     |    |          |     |           |    |     |     |        |   |      |     |  |
|--------------------------------------------------------------------------------------------------------------------------------------------------------------------------------------------------------------------------------|----------------------------------------------------------------------------------------------------------------------------------------------------------------------------------------------------------------------------------------------------------------------------------------------------------------------------------------------------------------------------------------------------------------------------------------------------------------------------------------------------------------------------------------------------------------------------------------------------------------------------------------------------------------------------------------------------------------------------------------------------|---------------------------|-----------|-----------------|-----------|-----|----|----------|-----|-----------|----|-----|-----|--------|---|------|-----|--|
| <ul style="list-style-type: none"> <li>○ Large costs</li> <li>● Moderate costs</li> <li>○ Negligible costs and savings</li> <li>○ Moderate savings</li> <li>○ Large savings</li> <li>○ Varies</li> <li>○ Don't know</li> </ul> | <p>*Genetic testing cost depends on how many exons have to be sequenced, and the sequencing is usually targeted to specific exons.</p> <table border="1" data-bbox="348 889 905 1052"> <thead> <tr> <th></th> <th></th> <th>Genetic testing</th> <th>VWF:FVIII</th> </tr> </thead> <tbody> <tr> <td>USA</td> <td>\$</td> <td>350-2000</td> <td>150</td> </tr> <tr> <td>Australia</td> <td>\$</td> <td>500</td> <td>240</td> </tr> <tr> <td>Europe</td> <td>€</td> <td>1000</td> <td>100</td> </tr> </tbody> </table> <p>There is considerable variability in cost among different jurisdictions. Cost is also affected by different factors including insurance plans. The estimate provided are based on the clinical experts best estimates.</p> |                           |           | Genetic testing | VWF:FVIII | USA | \$ | 350-2000 | 150 | Australia | \$ | 500 | 240 | Europe | € | 1000 | 100 |  |
|                                                                                                                                                                                                                                |                                                                                                                                                                                                                                                                                                                                                                                                                                                                                                                                                                                                                                                                                                                                                    | Genetic testing           | VWF:FVIII |                 |           |     |    |          |     |           |    |     |     |        |   |      |     |  |
| USA                                                                                                                                                                                                                            | \$                                                                                                                                                                                                                                                                                                                                                                                                                                                                                                                                                                                                                                                                                                                                                 | 350-2000                  | 150       |                 |           |     |    |          |     |           |    |     |     |        |   |      |     |  |
| Australia                                                                                                                                                                                                                      | \$                                                                                                                                                                                                                                                                                                                                                                                                                                                                                                                                                                                                                                                                                                                                                 | 500                       | 240       |                 |           |     |    |          |     |           |    |     |     |        |   |      |     |  |
| Europe                                                                                                                                                                                                                         | €                                                                                                                                                                                                                                                                                                                                                                                                                                                                                                                                                                                                                                                                                                                                                  | 1000                      | 100       |                 |           |     |    |          |     |           |    |     |     |        |   |      |     |  |

### Certainty of evidence of required resources

What is the certainty of the evidence of resource requirements (costs)?

| JUDGEMENT | RESEARCH EVIDENCE | ADDITIONAL CONSIDERATIONS |
|-----------|-------------------|---------------------------|
|-----------|-------------------|---------------------------|

|                                                                                                                                                |                                                 |  |
|------------------------------------------------------------------------------------------------------------------------------------------------|-------------------------------------------------|--|
| <ul style="list-style-type: none"> <li>○ Very low</li> <li>○ Low</li> <li>● Moderate</li> <li>○ High</li> <li>○ No included studies</li> </ul> | <p>Kaylor, 2015 used for genetic diagnosis.</p> |  |
|------------------------------------------------------------------------------------------------------------------------------------------------|-------------------------------------------------|--|

**Cost effectiveness**

Does the cost-effectiveness of the intervention favor the intervention or the comparison?

| <b>JUDGEMENT</b>                                                                                                                                                                                                                                                                                                        | <b>RESEARCH EVIDENCE</b> | <b>ADDITIONAL CONSIDERATIONS</b> |
|-------------------------------------------------------------------------------------------------------------------------------------------------------------------------------------------------------------------------------------------------------------------------------------------------------------------------|--------------------------|----------------------------------|
| <ul style="list-style-type: none"> <li>○ Favors the comparison</li> <li>○ Probably favors the comparison</li> <li>○ Does not favor either the intervention or the comparison</li> <li>○ Probably favors the intervention</li> <li>○ Favors the intervention</li> <li>○ Varies</li> <li>● No included studies</li> </ul> |                          |                                  |

**Equity**

What would be the impact on health equity?

| <b>JUDGEMENT</b>                                                                        | <b>RESEARCH EVIDENCE</b> | <b>ADDITIONAL CONSIDERATIONS</b>                                                                                                                   |
|-----------------------------------------------------------------------------------------|--------------------------|----------------------------------------------------------------------------------------------------------------------------------------------------|
| <ul style="list-style-type: none"> <li>○ Reduced</li> <li>● Probably reduced</li> </ul> |                          | <p>Genetic testing is not always covered by insurance, most insurance companies require prior authorization for genetic testing in the US, and</p> |

|                                                                                                                                                                   |  |                                                                                                                                                                                                                                                                                                                                                                                                                                                                                                                                                                                                                                                      |
|-------------------------------------------------------------------------------------------------------------------------------------------------------------------|--|------------------------------------------------------------------------------------------------------------------------------------------------------------------------------------------------------------------------------------------------------------------------------------------------------------------------------------------------------------------------------------------------------------------------------------------------------------------------------------------------------------------------------------------------------------------------------------------------------------------------------------------------------|
| <ul style="list-style-type: none"> <li>○ Probably no impact</li> <li>○ Probably increased</li> <li>○ Increased</li> <li>○ Varies</li> <li>○ Don't know</li> </ul> |  | <p>decisions are made by insurance companies on a case-by-case basis. In many instances, research studies offer free genetic testing.</p> <p>VWF:FVIII are covered by insurance but may have a very high deductible.</p> <p>In New Zealand, all residents get blood tests for free. This is also applicable in the UK since there is no practical restriction on requesting these tests. All assays are covered in Canada. Genetic testing is paid for in Australia.</p> <p>People with access problems and people with no health insurance are disadvantaged. Genetic testing is becoming more accessible and gives the confirmatory diagnosis.</p> |
|-------------------------------------------------------------------------------------------------------------------------------------------------------------------|--|------------------------------------------------------------------------------------------------------------------------------------------------------------------------------------------------------------------------------------------------------------------------------------------------------------------------------------------------------------------------------------------------------------------------------------------------------------------------------------------------------------------------------------------------------------------------------------------------------------------------------------------------------|

**Acceptability**  
Is the intervention acceptable to key stakeholders?

| JUDGEMENT                                                                                                                                                    | RESEARCH EVIDENCE | ADDITIONAL CONSIDERATIONS                                                                                                                                                                                                                                                                                                                                                                                                                                                                                                                                                                                                                                                          |
|--------------------------------------------------------------------------------------------------------------------------------------------------------------|-------------------|------------------------------------------------------------------------------------------------------------------------------------------------------------------------------------------------------------------------------------------------------------------------------------------------------------------------------------------------------------------------------------------------------------------------------------------------------------------------------------------------------------------------------------------------------------------------------------------------------------------------------------------------------------------------------------|
| <ul style="list-style-type: none"> <li>○ No</li> <li>○ Probably no</li> <li>● Probably yes</li> <li>○ Yes</li> <li>○ Varies</li> <li>○ Don't know</li> </ul> |                   | <p>Generally, patients accept having genetic testing and prefer it over other assays if they believe it could impact their personal diagnosis and/or management by providing definite answers. However, some patients believe that genetic testing is not necessary to make the diagnosis. It will not change management and is costly; also it is difficult to perform and may not always reveal a mutation/known mutation. Rarely the testing is turned down because of concern over privacy and if there is a genetic counselor available to discuss the test with them. Appropriate counseling and education are required, in addition to confirmation of results privacy.</p> |

**Feasibility**  
Is the intervention feasible to implement?

| JUDGEMENT                                              | RESEARCH EVIDENCE                                                                    | ADDITIONAL CONSIDERATIONS                                 |
|--------------------------------------------------------|--------------------------------------------------------------------------------------|-----------------------------------------------------------|
| <ul style="list-style-type: none"> <li>○ No</li> </ul> | <p>VWF:FVIII binding requires very trained staff with experience with the assay.</p> | <p>Although genetic testing and VWF:FVIII binding are</p> |

|                                                                                                                                                |                         |                                                                                                                                                                                                                                                                                                                                                                                                                                                                                                                                                                                                                                                                                                     |
|------------------------------------------------------------------------------------------------------------------------------------------------|-------------------------|-----------------------------------------------------------------------------------------------------------------------------------------------------------------------------------------------------------------------------------------------------------------------------------------------------------------------------------------------------------------------------------------------------------------------------------------------------------------------------------------------------------------------------------------------------------------------------------------------------------------------------------------------------------------------------------------------------|
| <ul style="list-style-type: none"> <li>○ Probably no</li> <li>● Probably yes</li> <li>○ Yes</li> <li>○ Varies</li> <li>○ Don't know</li> </ul> | <p>(Jennings, 2015)</p> | <p>not available in all hospitals, but most patients have access to it as they are sent out tests. However the process of genetic testing may take much longer, so patients will have to wait longer for results. So patient access to the hospital may be a feasibility issue, considering rural and remote patients and repeated visits required to diagnose, which is important when testing is needed to guide treatment for active bleed. To note, more data on genotype-phenotype correlation is needed. Relying on genetic testing alone is not safe - it may reveal a variant whose significance is completely unknown - then functional testing would be needed anyway in such a case.</p> |
|------------------------------------------------------------------------------------------------------------------------------------------------|-------------------------|-----------------------------------------------------------------------------------------------------------------------------------------------------------------------------------------------------------------------------------------------------------------------------------------------------------------------------------------------------------------------------------------------------------------------------------------------------------------------------------------------------------------------------------------------------------------------------------------------------------------------------------------------------------------------------------------------------|

#### SUMMARY OF JUDGEMENTS

|                                                     | JUDGEMENT       |             |              |               |  |        |                            |
|-----------------------------------------------------|-----------------|-------------|--------------|---------------|--|--------|----------------------------|
| PROBLEM                                             | No              | Probably no | Probably yes | Yes           |  | Varies | Don't know                 |
| TEST ACCURACY                                       | Very inaccurate | Inaccurate  | Accurate     | Very accurate |  | Varies | <b>Don't know</b>          |
| DESIRABLE EFFECTS                                   | Trivial         | Small       | Moderate     | Large         |  | Varies | <b>Don't know</b>          |
| UNDESIRABLE EFFECTS                                 | Large           | Moderate    | Small        | Trivial       |  | Varies | <b>Don't know</b>          |
| CERTAINTY OF THE EVIDENCE OF TEST ACCURACY          | Very low        | Low         | Moderate     | High          |  |        | <b>No included studies</b> |
| CERTAINTY OF THE EVIDENCE OF TEST'S EFFECTS         | Very low        | Low         | Moderate     | High          |  |        | <b>No included studies</b> |
| CERTAINTY OF THE EVIDENCE OF MANAGEMENT'S EFFECTS   | Very low        | Low         | Moderate     | High          |  |        | <b>No included studies</b> |
| CERTAINTY OF THE EVIDENCE OF TEST RESULT/MANAGEMENT | Very low        | Low         | Moderate     | High          |  |        | <b>No included studies</b> |

|                                             | JUDGEMENT                                   |                                               |                                                                 |                                         |                         |        |                            |
|---------------------------------------------|---------------------------------------------|-----------------------------------------------|-----------------------------------------------------------------|-----------------------------------------|-------------------------|--------|----------------------------|
| CERTAINTY OF EFFECTS                        | Very low                                    | <b>Low</b>                                    | Moderate                                                        | High                                    |                         |        | No included studies        |
| VALUES                                      | <b>Important uncertainty or variability</b> | Possibly important uncertainty or variability | Probably no important uncertainty or variability                | No important uncertainty or variability |                         |        |                            |
| BALANCE OF EFFECTS                          | Favors the comparison                       | Probably favors the comparison                | <b>Does not favor either the intervention or the comparison</b> | Probably favors the intervention        | Favors the intervention | Varies | Don't know                 |
| RESOURCES REQUIRED                          | Large costs                                 | <b>Moderate costs</b>                         | Negligible costs and savings                                    | Moderate savings                        | Large savings           | Varies | Don't know                 |
| CERTAINTY OF EVIDENCE OF REQUIRED RESOURCES | Very low                                    | Low                                           | <b>Moderate</b>                                                 | High                                    |                         |        | No included studies        |
| COST EFFECTIVENESS                          | Favors the comparison                       | Probably favors the comparison                | Does not favor either the intervention or the comparison        | Probably favors the intervention        | Favors the intervention | Varies | <b>No included studies</b> |
| EQUITY                                      | Reduced                                     | <b>Probably reduced</b>                       | Probably no impact                                              | Probably increased                      | Increased               | Varies | Don't know                 |
| ACCEPTABILITY                               | No                                          | Probably no                                   | <b>Probably yes</b>                                             | Yes                                     |                         | Varies | Don't know                 |
| FEASIBILITY                                 | No                                          | Probably no                                   | <b>Probably yes</b>                                             | Yes                                     |                         | Varies | Don't know                 |

#### TYPE OF RECOMMENDATION

|                                                     |                                                          |                                                                                      |                                                      |                                                 |
|-----------------------------------------------------|----------------------------------------------------------|--------------------------------------------------------------------------------------|------------------------------------------------------|-------------------------------------------------|
| Strong recommendation against the intervention<br>○ | Conditional recommendation against the intervention<br>○ | <b>Conditional recommendation for either the intervention or the comparison</b><br>● | Conditional recommendation for the intervention<br>○ | Strong recommendation for the intervention<br>○ |
|-----------------------------------------------------|----------------------------------------------------------|--------------------------------------------------------------------------------------|------------------------------------------------------|-------------------------------------------------|

#### CONCLUSIONS



## Recommendation

The panel suggests using either VWF:FVIII (VWF FVIII binding assay) or targeted genetic testing, in patients with suspected Type 2N VWD in need of additional testing. (Please see Diagnostic algorithm xxx).

(Conditional recommendation based on low certainty in the evidence)

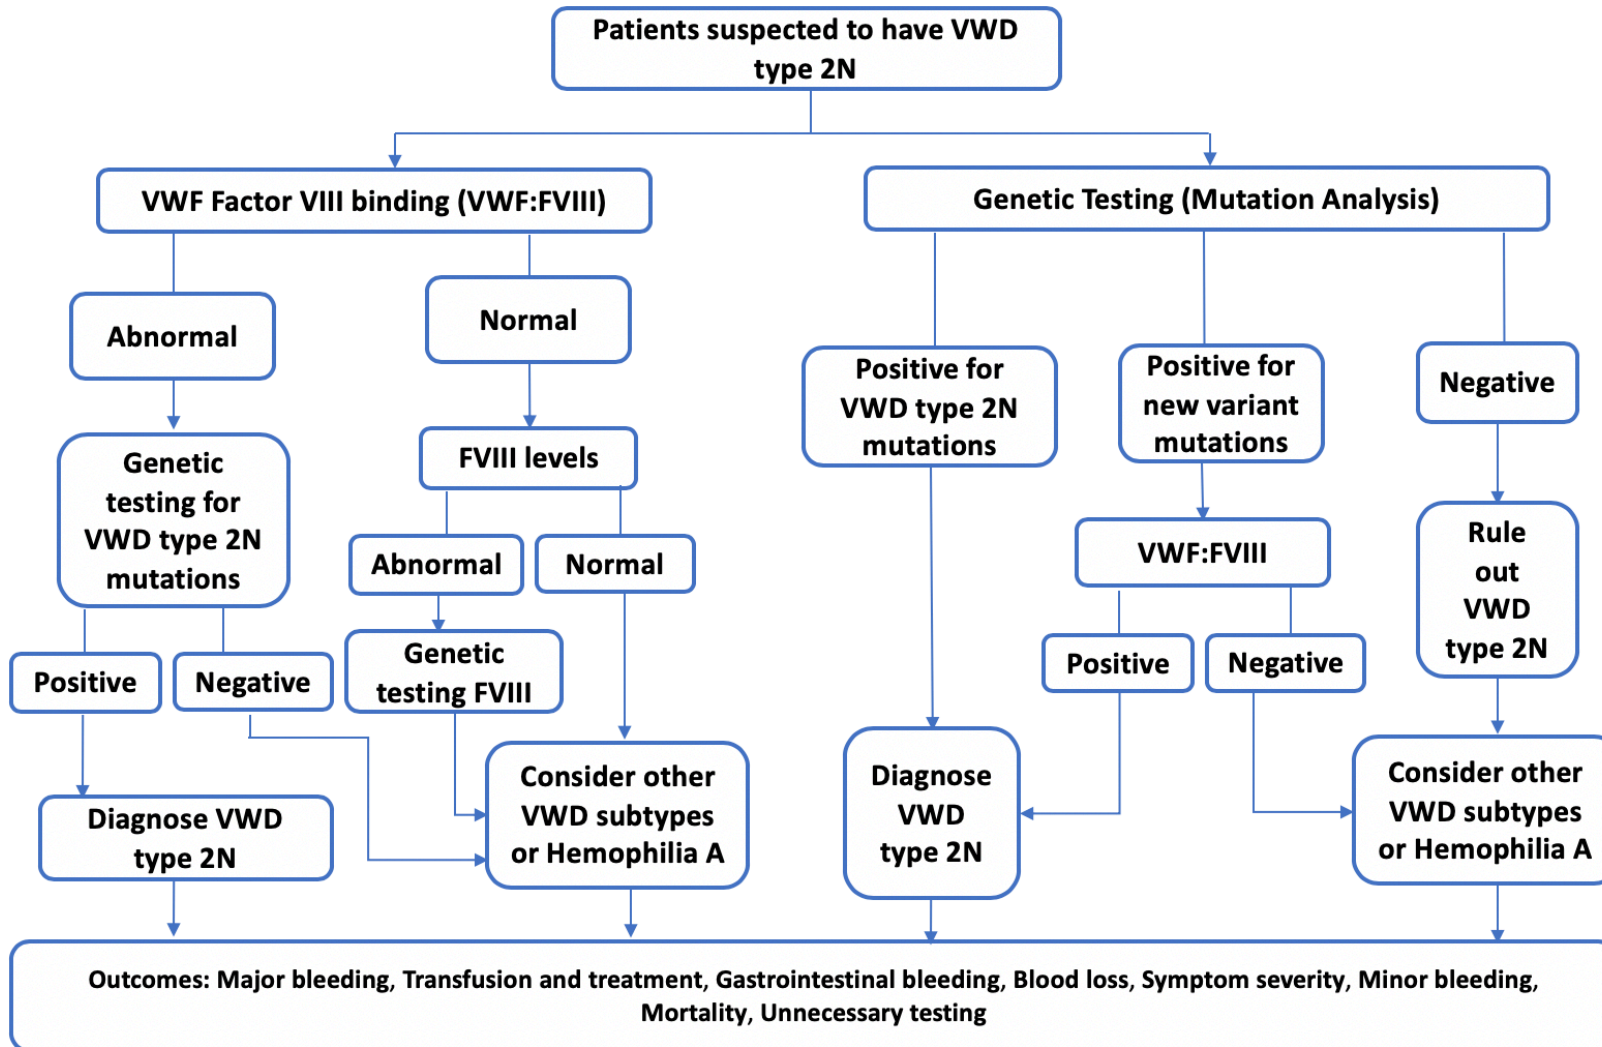

## Justification

The guideline panel determined that there is low certainty in the evidence for either a health benefit or harm from using FVIII:VWF assay over genetic testing in patients with suspected type 2N VWD in need for additional testing for classification. The panel agreed that these tests can be complementary: FVIII:VWF is a straightforward laboratory test, however genetic counseling is better when doing genetic testing as opposed to the phenotypic testing. Other EtD criteria were generally not favor of using either assays for classification so that the desirable consequences were equal to the undesirable consequences.

### Subgroup considerations

### Implementation considerations

### Monitoring and evaluation

### Research priorities

Research around a reference standard for type 2N VWD.

#### APPENDIX

##### 1. Risk of bias:

| Author       | Risk of bias population selection | Risk of bias index test | Risk of bias reference test | Flow and timing Rsk of bias |
|--------------|-----------------------------------|-------------------------|-----------------------------|-----------------------------|
| Batlle, 2006 | High                              | Low                     | High                        | Low                         |
| Borras, 2017 | High                              | Low                     | High                        | Low                         |

|                     |      |      |      |     |
|---------------------|------|------|------|-----|
| Casonato, 2018      | Low  | Low  | High | Low |
| Veyradier, 2016     | High | High | Low  | Low |
| Costa Pinto, 2014   | High | High | Low  | Low |
| Wang, 2013          | Low  | High | Low  | Low |
| Hamoshire, 2013     | High | High | Low  | Low |
| Veyradier, 2011     | High | Low  | High | Low |
| Zhukov, 2009        | High | Low  | High | Low |
| Corrales, 2009      | High | High | High | Low |
| Casanato, 2007      | High | Low  | High | Low |
| Taylor, 2002        | Low  | Low  | High | Low |
| Rodgers, 2002       | High | High | Low  | Low |
| Caron, 2002         | High | Low  | Low  | Low |
| Casonato, 1998      | High | Low  | High | Low |
| Bowen, 1998         | Low  | High | High | Low |
| Schneppenheim, 1996 | Low  | Low  | High | Low |

## 2. Outcomes:

➤ *Mutation detection:*

| Article           | Mutations                                                                          |
|-------------------|------------------------------------------------------------------------------------|
| Borras, 2017      | p.Arg816Trp, p.Arg854Gln                                                           |
| Battle, 2016      | p.Arg816Trp and p.Arg854Gln                                                        |
| Casonato, 2018    | p.R854Q, p.P812Rfs*31, p.G2352_2360del or the new p.C524Y, p.R760C                 |
| Veyradier, 2016   | R768Q, C788Y, T791M, L809P, R816W, R854Q, G887R, C1060R                            |
| Costa Pinto, 2014 | R816W, R854Q                                                                       |
| Wang, 2013        | P812L, R854Q, R924Q,                                                               |
| Hamoshire, 2013   | (p.C788R, p.C1225G)                                                                |
| Veyradier, 2011   | Arg854Gln, Arg816Trp, Cys788Tyr, Cys1070Arg, Thr791Met, Leu884PhefsX19, Cys1060Arg |
| Zhukov, 2009      | R854Q, H817Q, H817Q/R1342C                                                         |
| Corrales, 2009    | R816W                                                                              |
| Casanato, 2007    | R854Q, R760C                                                                       |
| Taylor, 2002      | R53W, R91Q                                                                         |
| Rodgers, 2002     | R854Q                                                                              |
| Caron, 2002       | R816W, R854Q, C858F, C804F,                                                        |
| Casonato, 1998    | R53W, R91Q                                                                         |
| Bowen, 1998       | R854Q, R952Q, R816W, H817Q, C858F                                                  |

|                     |                  |
|---------------------|------------------|
| Schneppenheim, 1996 | E24K, T28M, R91Q |
|---------------------|------------------|

➤ *Correlation results:*

| Author, year      | Results: In all studies homozygous VWD2N patients had binding ratios <0.12, heterozygous carriers had intermediate binding ratios of 0.44–0.61, and healthy control subjects had ratios of 0.73–1.42                                                                                                                                                                                                                                                                                                                                                                                                                                                         |
|-------------------|--------------------------------------------------------------------------------------------------------------------------------------------------------------------------------------------------------------------------------------------------------------------------------------------------------------------------------------------------------------------------------------------------------------------------------------------------------------------------------------------------------------------------------------------------------------------------------------------------------------------------------------------------------------|
| Batlle, 2016      | 9 patients were type 2N VWD and 11 patients were carriers of type 2N VWD. Regarding the 2N VWD patients, five were homozygous for a 2N mutation, and four were compound heterozygous in trans for p.Gln895His and a nonsense or missense mutation.                                                                                                                                                                                                                                                                                                                                                                                                           |
| Borras, 2017      |                                                                                                                                                                                                                                                                                                                                                                                                                                                                                                                                                                                                                                                              |
| Casonato, 2018    | Genetic analysis demonstrated that all the patients with VWF:FVIII B ratios below 0.3 were carrying the p.R854Q mutation at homozygous or compound heterozygous level with a quantitative VWF defect. There were also 51 patients with a VWF:FVIII B ratio below 0.74, but above 0.3. 34/51 (67%) were heterozygous for the p.R854Q mutation, and one was carrying the p.R760C mutation at heterozygous level; two of the 34 patients were also haemophilia A carriers, and one suffered from haemophilia A. The other 16 patients revealed no mutations in the main FVIII binding domain of VWF.                                                            |
| Veyradier, 2016   | 100% correlation for the 81 type 2N VWD patients. in type 2N, 22 truncating mutations leading to a silent allele were also found (type 2N/3 patients) including one-third also found in our type 3 VWD patients                                                                                                                                                                                                                                                                                                                                                                                                                                              |
| Costa Pinto, 2014 | All type 2N VWD patients (n = 5) showed normal VWF:RCo/VWF:Ag ratios and VWF:FVIII B <0.8.                                                                                                                                                                                                                                                                                                                                                                                                                                                                                                                                                                   |
| Hamoshire, 2013   | When compared against normal plasma (100%), patient plasma had reduced FVIII binding capacity (VWF:FVIII B) similar to that observed in plasma from a known type 2N patient homozygous for p.T791M (p.C788R homozygote 0% (heterozygote 49%) vs. 1.3%; p.C1225G homozygote 7.1% vs. 7.1%)                                                                                                                                                                                                                                                                                                                                                                    |
| Veyradier, 2011   | The mean FVIII:C/VWF:Ag ratio is 0.26 which is mainly representative of the homozygous Arg854Gln subgroup (mean FVIII:C/VWF:Ag ratio at 0.27). The values range between 0.04 and 0.47. 9 heterozygous carriers for a 2N mutation includes 8 subjects with a Arg854Gln mutation and 1 subject with a Cys1060Arg mutation. In all of them, the FVIII:C/VWF:Ag ratio is normal, higher than 0.6. All patients with type 2N VWD exhibit a severely decreased VWF:FVIII B with values lower than 15%, and No control subject (healthy subjects, haemophilia A, haemophilia carriers or VWD patients other than type 2N) exhibit a markedly decreased VWF:FVIII B. |

|                     |                                                                                                                                                                                                                                                                                                                                                                                                                                                                                                                                                                                                                      |
|---------------------|----------------------------------------------------------------------------------------------------------------------------------------------------------------------------------------------------------------------------------------------------------------------------------------------------------------------------------------------------------------------------------------------------------------------------------------------------------------------------------------------------------------------------------------------------------------------------------------------------------------------|
| Zhukov, 2009        | All samples from subjects with homozygous or heterozygous mutation showed abnormal VWF- FVIII binding, and three distinct ratio ranges were observed: homozygous VWD2N patients had binding ratios <0.12, heterozygous carriers had intermediate binding ratios of 0.44–0.61, and healthy control subjects had ratios of 0.73–1.42<br>Special precautions must be taken when reporting patient results in the 0.65–0.72 range, which is probably the assay’s true equivocal zone; rare outliers of both normal and heterozygous individuals occasionally fall in this range, as do results from compromised samples. |
| Casanato, 2007      | all the type 2N carriers identified in the present study had a reduced VWF:FVIII to VWF:Ag ratio, regardless of the FVIII/VWF:Ag ratio or VWF:FVIII values. The mean VWF:FVIII ratio was 0.56±0.10 vs normal >0.75 and no relationship was demonstrable between VWF:FVIII and FVIII/VWF:Ag.                                                                                                                                                                                                                                                                                                                          |
| Taylor, 2002        | The homozygous R53W sample exhibited minimal FVIII binding activity, whilst the heterozygous R91Qr gave a result of 0.43 compared with the PNP reference plasma value of 1.0                                                                                                                                                                                                                                                                                                                                                                                                                                         |
| Rodgers, 2002       | patients with very low factor VIII binding were clearly identified, and all control subjects with hemophilia were clearly identified as having normal factor VIII binding.                                                                                                                                                                                                                                                                                                                                                                                                                                           |
| Caron, 2002         | A total of 15 unrelated patients were diagnosed as being affected with type 2N VWD because their VWF:FVIII was found to be markedly decreased (9.65 ± 2.75%, n = 14) or nul (n = 1). 5 patients exhibited intermediate FVIII binding capacity (VWF:FVIII = 57.2 ± 6.8%), similar but slightly greater (P = 0.015) than that obtained with the NP/2N mixture.                                                                                                                                                                                                                                                         |
| Schneppenheim, 1996 | All 5 patients and their families (total of 68) with VWD type 2N homogenous and heterogenous mutations had a VWF:FVIII level of <60, (if homogenous <8) except for 1 patient with WT   R91Q genotype had a level of 63.                                                                                                                                                                                                                                                                                                                                                                                              |

|                 |                             |                   |                             |
|-----------------|-----------------------------|-------------------|-----------------------------|
| Genetic testing |                             | FVIII:VWF binding |                             |
| Sensitivity     | 1.00 (95% CI: 1.00 to 1.00) | Sensitivity       | 1.00 (95% CI: 1.00 to 1.00) |

|             |    |     |
|-------------|----|-----|
| Prevalences | 1% | 50% |
|-------------|----|-----|

| Outcome                                           | No of studies (No of patients) | Study design               | Factors that may decrease certainty of evidence |              |               |             |                  | Effect per 1,000 patients tested        |                   |                                          |                   | Test accuracy CoE |
|---------------------------------------------------|--------------------------------|----------------------------|-------------------------------------------------|--------------|---------------|-------------|------------------|-----------------------------------------|-------------------|------------------------------------------|-------------------|-------------------|
|                                                   |                                |                            |                                                 |              |               |             |                  | pre-test probability of 1% <sup>b</sup> |                   | pre-test probability of 50% <sup>c</sup> |                   |                   |
|                                                   |                                |                            | Risk of bias                                    | Indirectness | Inconsistency | Imprecision | Publication bias | Genetic testing be used                 | FVIII:VWF binding | Genetic testing be used                  | FVIII:VWF binding |                   |
| <b>True positives</b> (patients with VWD type 2N) | 10 studies<br>178 patients     | cohort & case-control type | very serious <sup>a</sup>                       | not serious  | not serious   | not serious | none             | 10 (10 to 10)                           | 10 (10 to 10)     | 500 (500 to 500)                         | 500 (500 to 500)  | ⊕⊕○○<br>LOW       |
|                                                   |                                |                            |                                                 |              |               |             |                  | <b>0 fewer TP in Genetic testing be</b> |                   | <b>0 fewer TP in Genetic testing be</b>  |                   |                   |

| Outcome                                                                               | No of studies (No of patients) | Study design | Factors that may decrease certainty of evidence |              |               |             |                  | Effect per 1,000 patients tested        |                   |                                          |                   | Test accuracy CoE |
|---------------------------------------------------------------------------------------|--------------------------------|--------------|-------------------------------------------------|--------------|---------------|-------------|------------------|-----------------------------------------|-------------------|------------------------------------------|-------------------|-------------------|
|                                                                                       |                                |              |                                                 |              |               |             |                  | pre-test probability of 1% <sup>b</sup> |                   | pre-test probability of 50% <sup>c</sup> |                   |                   |
|                                                                                       |                                |              | Risk of bias                                    | Indirectness | Inconsistency | Imprecision | Publication bias | Genetic testing be used                 | FVIII:VWF binding | Genetic testing be used                  | FVIII:VWF binding |                   |
|                                                                                       |                                | studies      |                                                 |              |               |             |                  |                                         |                   |                                          |                   |                   |
| <b>False negatives</b><br>(patients incorrectly classified as not having VWD type 2N) |                                |              |                                                 |              |               |             |                  |                                         |                   |                                          |                   |                   |
|                                                                                       |                                |              |                                                 |              |               |             |                  |                                         |                   |                                          |                   |                   |
|                                                                                       |                                |              |                                                 |              |               |             |                  |                                         |                   |                                          |                   |                   |

#### Explanations

- Serious patient selection bias due to case-control study design and serious bias with the reference standard and/or index test in all studies
- Typically seen in patients investigated for VWD because of a personal history of abnormal laboratory test (e.g., increased PTT).
- Typically seen in patients investigated for VWD as a first degree relative for a patient with VWD type 2N.

#### References

- Casonato A. G. E, Sarolo, L., Daidone, V. Type 2N von Willebrand disease: Characterization and diagnostic difficulties. 2018. *Haemophilia* 2018;24: 134–140.
- Borras B, J., Perez-Rodriguez, A., Lopez-Fernandez, M. F., Rodriguez-Trillo, A., Loures, E., Cid, A. R., Bonanad, S., Cabrera, N., Moret, A., Parra, R., Mingot-Castellano, M. E., Balda, I., Altisent, C., Perez-Montes, R., Fisac, R. M., Iruin, G., Herrero, S., Soto, I., De Rueda, B., Jimenez-Yuste, V., Alonso, N., Vilarino, D., Arijia, O., Campos, R., Paloma, M. J., Bermejo, N., Berruenco, R., Mateo, J., Arribalzaga, K., Marco, P., Palomo, A., Sarmiento, L., Inigo, B., Nieto, M. M., Vidal, R., Martinez, M. P., Aguinaco, R., Cesar, J. M., Ferreiro, M., Garcia-Frade, J., Rodriguez-Huerta, A. M., Cuesta, J., Rodriguez-Gonzalez, R., Garcia-Candel, F., Cornudella, R., Aguilar, C., Vidal, F., Corrales, I. Molecular and clinical profile of von willebrand disease in Spain (PCM-EVW-ES): Comprehensive genetic analysis by next-generation sequencing of 480 patients. *Haematologica*. 2017 Dec;102(12):2005-2014
- Veyradier A, Boisseau P., Fressinaud, E., Caron, C., Ternisien, C., Giraud, M., Zawadzki, C., Trossaert, M., Itzhar-Baikian, N., Dreyfus, M., d'Oiron, R., Borel-Derlon, A., Susen, S., Bezieau, S., Denis, C. V., Goudemand, J., French Reference Center for von Willebrand, disease. A Laboratory Phenotype/Genotype Correlation of 1167 French Patients From 670 Families With von Willebrand Disease: A New Epidemiologic Picture. *Medicine (Baltimore)*. 2016;95(11):e3038.
- Batlle J, Perez-Rodriguez, A., Corrales, I., Lopez-Fernandez, M. F., Rodriguez-Trillo, A., Loures, E., Cid, A. R., Bonanad, S., Cabrera, N., Moret, A., Parra, R., Mingot-Castellano, M. E., Balda, I., Altisent, C., Perez-Montes, R., Fisac, R. M., Iruin, G., Herrero, S., Soto, I., De Rueda, B., Jimenez-Yuste, V., Alonso, N., Vilarino, D., Arijia, O., Campos, R., Paloma, M. J., Bermejo, N., Toll, T., Mateo, J., Arribalzaga, K., Marco, P., Palomo, A., Sarmiento, L., Inigo, B., Del Mar Nieto, M., Vidal, R., Martinez, M. P., Aguinaco, R., Cesar, J. M., Ferreiro, M., Garcia-Frade, J., Rodriguez-Huerta, A. M., Cuesta, J.,

- Rodriguez-Gonzalez, R., Garcia-Candel, F., Cornudella, R., Aguilar, C., Borrás, N., Vidal, F. Molecular and clinical profile of von willebrand disease in Spain (PCM-EVW-ES): Proposal for a new diagnostic paradigm. *Thrombosis and Haemostasis*. 2016;115(1):40-50.
5. Costa-Pinto J, Perez-Rodriguez, A., Gomez-del-Castillo, M. D. C., Loures, E., Rodriguez-Trillo, A., Batlle, J., Lopez-Fernandez, M. F. Diagnosis of inherited von Willebrand disease: Comparison of two methodologies and analysis of the discrepancies. *Haemophilia*. 2014;20(4):559-567.
  6. Wang QY, Song, J., Gibbs, R. A., Boerwinkle, E., Dong, J. F., Yu, F. L. Characterizing polymorphisms and allelic diversity of von Willebrand factor gene in the 1000 Genomes. *Journal of Thrombosis and Haemostasis*. 2013;11(2):261-269.
  7. Hampshire DJ, Abuzenadah, A. M., Cartwright, A., Al-Shammari, N. S., Coyle, R. E., Eckert, M., Al-Buhairan, A. M., Messenger, S. L., Budde, U., Gursel, T., Ingerslev, J., Peake, I. R., Goodeve, A. C. Identification and characterisation of mutations associated with von willebrand disease in a Turkish patient cohort. *Thrombosis and Haemostasis*. 2013;110(2):264-274.
  8. Veyradier A, Caron, C., Ternisien, C., Wolf, M., Trossaert, M., Fressinaud, E., Goudemand, J. Validation of the first commercial ELISA for type 2N von Willebrand's disease diagnosis. *Haemophilia : the official journal of the World Federation of Hemophilia*. 2011;17(6):944-951.
  9. Zhukov O, Popov, J., Ramos, R., Vause, C., Ruden, S., Sferruzza, A., Dlott, J., Sahud, M. Measurement of von willebrand factor-FVIII binding activity in patients with suspected von willebrand disease type 2N: Application of an ELISA-based assay in a reference laboratory. *Haemophilia*. 2009;15(3):788-796.
  10. Corrales I, Ramirez, L., Aitisent, C., Parra, R., Vidal, F. Rapid molecular diagnosis of von Willebrand disease by direct sequencing. Detection of 12 novel putative mutations in VWF gene. *Thrombosis and Haemostasis*. 2009;101(3):570-576.
  11. Casonato A, Pontara, E., Sartorello, F., Cattini, M. G., Perutelli, P., Bertomoro, A., Gallinaro, L., Pagnan, A. Identifying carriers of type 2N von Willebrand disease: Procedures and significance. *Clinical and Applied Thrombosis/Hemostasis*. 2007;13(2):194-200.
  12. Taylor SL, Bromidge, E., Savidge, G. F., Alhaq, A. Evaluation of an automated screening assay for von Willebrand disease type 2N. *Clinical and Laboratory Haematology*. 2002;24(6):369-375.
  13. Rodgers SE, Lerda, N. V., Favaloro, E. J., Duncan, E. M., Casey, G. J., Quinn, D. M., Hertzberg, M., Lloyd, J. V. Identification of von Willebrand disease type 2N (Normandy) in Australia: A cross-laboratory investigation using different methods. *American Journal of Clinical Pathology*. 2002;118(2):269-276.
  14. Caron C, Mazurier, C., Goudemand, J. Large experience with a factor VIII binding assay of plasma von Willebrand factor using commercial reagents. *Br J Haematol*. 2002;117(3):716-718.
  15. Casonato A, Pontara, E., Zerbinati, P., Zucchetto, A., Girolami, A. The evaluation of factor VIII binding activity of von Willebrand factor by means of an ELISA method: Significance and practical implications. *American Journal of Clinical Pathology*. 1998;109(3):347-352.
  16. Bowen DJ, Standen, G. R., Mazurier, C., Gaucher, C., Cumming, A., Keeney, S., Bidwell, J. Type 2N von Willebrand disease: Rapid genetic diagnosis of G2811A (R854Q), C2696T (R816W), T2701A (H817Q) and G2823T (C858F) - Detection of a novel candidate type 2N mutation: C2810T (R854W). *Thrombosis and Haemostasis*. 1998;80(1):32-36.
  17. Schneppenheim R, Budde, U., Krey, S., Drewke, E., Bergmann, F., Lechler, E., Oldenburg, J., Schwaab, R. Results of a screening for von Willebrand disease type 2N in patients with suspected haemophilia A or von Willebrand disease type 1. *Thrombosis and Haemostasis*. 1996;76(4):598-602.
